# Supplementary material for: The rapid developmental rise of somatic inhibition disengages hippocampal dynamics from self-motion
Source: eLife journal article supplement (doi:10.7554/elife.78116), 2022-07-20
Supplement: supp [file activation_ratio_all_moves_table.xlsx]

## Sheet: Sheet1
	Behavior	Mvt Onset Frame	Activity ratio	Celltype	Session	SubjectID	Group
0	Xcplx_mvt	158	63.6364	All	p10_190921_191001_191001_a000	190921_191001	P10
1	Xcplx_mvt	1217	49.1525	All	p10_190921_191001_191001_a000	190921_191001	P10
2	Xcplx_mvt	1295	56.6038	All	p10_190921_191001_191001_a000	190921_191001	P10
3	Xcplx_mvt	1496	23.5294	All	p10_190921_191001_191001_a000	190921_191001	P10
4	Xcplx_mvt	1602	29.1667	All	p10_190921_191001_191001_a000	190921_191001	P10
5	Xcplx_mvt	1645	66.6667	All	p10_190921_191001_191001_a000	190921_191001	P10
6	Xcplx_mvt	2160	7.35294	All	p10_190921_191001_191001_a000	190921_191001	P10
7	Xcplx_mvt	2237	34.2857	All	p10_190921_191001_191001_a000	190921_191001	P10
8	Xcplx_mvt	2393	35.1852	All	p10_190921_191001_191001_a000	190921_191001	P10
9	Xcplx_mvt	2983	65.1163	All	p10_190921_191001_191001_a000	190921_191001	P10
10	Xcplx_mvt	3072	53.3333	All	p10_190921_191001_191001_a000	190921_191001	P10
11	Xcplx_mvt	3108	88.4615	All	p10_190921_191001_191001_a000	190921_191001	P10
12	Xcplx_mvt	3660	29.8246	All	p10_190921_191001_191001_a000	190921_191001	P10
13	Xcplx_mvt	4335	26.3158	All	p10_190921_191001_191001_a000	190921_191001	P10
14	Xcplx_mvt	4592	56	All	p10_190921_191001_191001_a000	190921_191001	P10
15	Xcplx_mvt	5063	37.5	All	p10_190921_191001_191001_a000	190921_191001	P10
16	Xcplx_mvt	5211	42.8571	All	p10_190921_191001_191001_a000	190921_191001	P10
17	Xcplx_mvt	5391	38.961	All	p10_190921_191001_191001_a000	190921_191001	P10
18	Xcplx_mvt	5670	44.4444	All	p10_190921_191001_191001_a000	190921_191001	P10
19	Xcplx_mvt	5477	29.8246	All	p10_190921_191001_191001_a000	190921_191001	P10
20	Xcplx_mvt	6093	53.8462	All	p10_190921_191001_191001_a000	190921_191001	P10
21	Xcplx_mvt	6674	38.8889	All	p10_190921_191001_191001_a000	190921_191001	P10
22	Xcplx_mvt	6862	35.9375	All	p10_190921_191001_191001_a000	190921_191001	P10
23	Xcplx_mvt	7022	33.3333	All	p10_190921_191001_191001_a000	190921_191001	P10
24	Xcplx_mvt	7559	53.4483	All	p10_190921_191001_191001_a000	190921_191001	P10
25	Xcplx_mvt	7908	37.8049	All	p10_190921_191001_191001_a000	190921_191001	P10
26	Xcplx_mvt	8067	24.5902	All	p10_190921_191001_191001_a000	190921_191001	P10
27	Xcplx_mvt	8131	55.814	All	p10_190921_191001_191001_a000	190921_191001	P10
28	Xcplx_mvt	8496	10.2041	All	p10_190921_191001_191001_a000	190921_191001	P10
29	Xcplx_mvt	8634	47.1698	All	p10_190921_191001_191001_a000	190921_191001	P10
30	Xcplx_mvt	8799	22.6415	All	p10_190921_191001_191001_a000	190921_191001	P10
31	Xcplx_mvt	8945	43.1034	All	p10_190921_191001_191001_a000	190921_191001	P10
32	Xcplx_mvt	9035	40.5405	All	p10_190921_191001_191001_a000	190921_191001	P10
33	Xcplx_mvt	9176	39.4737	All	p10_190921_191001_191001_a000	190921_191001	P10
34	Xcplx_mvt	9252	25.4902	All	p10_190921_191001_191001_a000	190921_191001	P10
35	Xcplx_mvt	9380	28.3019	All	p10_190921_191001_191001_a000	190921_191001	P10
36	Xcplx_mvt	9660	61.2903	All	p10_190921_191001_191001_a000	190921_191001	P10
37	Xcplx_mvt	9915	49.2958	All	p10_190921_191001_191001_a000	190921_191001	P10
38	Xcplx_mvt	10212	32.4324	All	p10_190921_191001_191001_a000	190921_191001	P10
39	Xcplx_mvt	10570	40	All	p10_190921_191001_191001_a000	190921_191001	P10
40	Xcplx_mvt	10632	26.087	All	p10_190921_191001_191001_a000	190921_191001	P10
41	Xcplx_mvt	10755	39.1304	All	p10_190921_191001_191001_a000	190921_191001	P10
42	Xcplx_mvt	10711	12.5	All	p10_190921_191001_191001_a000	190921_191001	P10
43	Xcplx_mvt	10903	15.5556	All	p10_190921_191001_191001_a000	190921_191001	P10
44	Xcplx_mvt	11064	79.4118	All	p10_190921_191001_191001_a000	190921_191001	P10
45	Xcplx_mvt	11208	47.619	All	p10_190921_191001_191001_a000	190921_191001	P10
46	Xcplx_mvt	11258	19.4444	All	p10_190921_191001_191001_a000	190921_191001	P10
47	Xcplx_mvt	11023	48.7179	All	p10_190921_191001_191001_a000	190921_191001	P10
48	Xcplx_mvt	11342	52.5	All	p10_190921_191001_191001_a000	190921_191001	P10
49	Xcplx_mvt	11810	88.8889	All	p10_190921_191001_191001_a000	190921_191001	P10
50	Xcplx_mvt	11599	65.7895	All	p10_190921_191001_191001_a000	190921_191001	P10
51	Xcplx_mvt	12235	47.8261	All	p10_190921_191001_191001_a000	190921_191001	P10
52	Xcplx_mvt	11939	47.1698	All	p10_190921_191001_191001_a000	190921_191001	P10
53	Xrun	3170	42.5532	All	p10_190921_191001_191001_a000	190921_191001	P10
54	Xrun	11316	78.2609	All	p10_190921_191001_191001_a000	190921_191001	P10
55	Xstartle	755	22.2222	All	p10_190921_191001_191001_a000	190921_191001	P10
56	Xstartle	1766	48.7805	All	p10_190921_191001_191001_a000	190921_191001	P10
57	Xstartle	1881	33.3333	All	p10_190921_191001_191001_a000	190921_191001	P10
58	Xstartle	2025	35.0877	All	p10_190921_191001_191001_a000	190921_191001	P10
59	Xstartle	2626	32.2581	All	p10_190921_191001_191001_a000	190921_191001	P10
60	Xstartle	2915	39.1304	All	p10_190921_191001_191001_a000	190921_191001	P10
61	Xstartle	3581	25	All	p10_190921_191001_191001_a000	190921_191001	P10
62	Xstartle	3698	65	All	p10_190921_191001_191001_a000	190921_191001	P10
63	Xstartle	5978	29.4118	All	p10_190921_191001_191001_a000	190921_191001	P10
64	Xstartle	7191	60.4167	All	p10_190921_191001_191001_a000	190921_191001	P10
65	Xtwitch	250	58.0645	All	p10_190921_191001_191001_a000	190921_191001	P10
66	Xtwitch	4416	37.5	All	p10_190921_191001_191001_a000	190921_191001	P10
67	Xtwitch	5760	36.9231	All	p10_190921_191001_191001_a000	190921_191001	P10
68	Xtwitch	5913	19.2982	All	p10_190921_191001_191001_a000	190921_191001	P10
69	Xtwitch	6034	24.3902	All	p10_190921_191001_191001_a000	190921_191001	P10
70	Xtwitch	6255	34.0426	All	p10_190921_191001_191001_a000	190921_191001	P10
71	Xtwitch	6343	29.8507	All	p10_190921_191001_191001_a000	190921_191001	P10
72	Xtwitch	6472	26.6667	All	p10_190921_191001_191001_a000	190921_191001	P10
73	Xtwitch	7273	40.7407	All	p10_190921_191001_191001_a000	190921_191001	P10
74	Xtwitch	7405	23.5294	All	p10_190921_191001_191001_a000	190921_191001	P10
75	Xtwitch	7725	53.1915	All	p10_190921_191001_191001_a000	190921_191001	P10
76	Xtwitch	7815	26.8293	All	p10_190921_191001_191001_a000	190921_191001	P10
77	Xtwitch	10377	22.2222	All	p10_190921_191001_191001_a000	190921_191001	P10
78	Xtwitch	10822	26.5306	All	p10_190921_191001_191001_a000	190921_191001	P10
79	Xtwitch	10974	37.5	All	p10_190921_191001_191001_a000	190921_191001	P10
80	Xtwitch	11874	35.4839	All	p10_190921_191001_191001_a000	190921_191001	P10
81	Xtwitch	12358	55.1724	All	p10_190921_191001_191001_a000	190921_191001	P10
82	Xtwitch	12409	40	All	p10_190921_191001_191001_a000	190921_191001	P10
83	Xcomplexe_movements	388	29	All	p11_190921_191002_191002_a001	190921_191002	P11
84	Xcomplexe_movements	659	51.7857	All	p11_190921_191002_191002_a001	190921_191002	P11
85	Xcomplexe_movements	716	35.443	All	p11_190921_191002_191002_a001	190921_191002	P11
86	Xcomplexe_movements	1178	33.3333	All	p11_190921_191002_191002_a001	190921_191002	P11
87	Xcomplexe_movements	1664	86.7925	All	p11_190921_191002_191002_a001	190921_191002	P11
88	Xcomplexe_movements	1720	57.1429	All	p11_190921_191002_191002_a001	190921_191002	P11
89	Xcomplexe_movements	1940	53.2258	All	p11_190921_191002_191002_a001	190921_191002	P11
90	Xcomplexe_movements	2179	22.9885	All	p11_190921_191002_191002_a001	190921_191002	P11
91	Xcomplexe_movements	2866	25.6757	All	p11_190921_191002_191002_a001	190921_191002	P11
92	Xcomplexe_movements	3594	30.4348	All	p11_190921_191002_191002_a001	190921_191002	P11
93	Xcomplexe_movements	3704	81.8182	All	p11_190921_191002_191002_a001	190921_191002	P11
94	Xcomplexe_movements	4099	41.9753	All	p11_190921_191002_191002_a001	190921_191002	P11
95	Xcomplexe_movements	4595	20.4545	All	p11_190921_191002_191002_a001	190921_191002	P11
96	Xcomplexe_movements	4693	30	All	p11_190921_191002_191002_a001	190921_191002	P11
97	Xcomplexe_movements	5791	29.4118	All	p11_190921_191002_191002_a001	190921_191002	P11
98	Xcomplexe_movements	6207	41.8182	All	p11_190921_191002_191002_a001	190921_191002	P11
99	Xcomplexe_movements	7391	46.9388	All	p11_190921_191002_191002_a001	190921_191002	P11
100	Xcomplexe_movements	10297	94.5946	All	p11_190921_191002_191002_a001	190921_191002	P11
101	Xcomplexe_movements	10384	20	All	p11_190921_191002_191002_a001	190921_191002	P11
102	Xcomplexe_movements	10769	31.4815	All	p11_190921_191002_191002_a001	190921_191002	P11
103	Xcomplexe_movements	10962	24.3902	All	p11_190921_191002_191002_a001	190921_191002	P11
104	Xrun_walk	380	41.5842	All	p11_190921_191002_191002_a001	190921_191002	P11
105	Xrun_walk	479	42.1053	All	p11_190921_191002_191002_a001	190921_191002	P11
106	Xrun_walk	680	57.8947	All	p11_190921_191002_191002_a001	190921_191002	P11
107	Xrun_walk	1162	83.1325	All	p11_190921_191002_191002_a001	190921_191002	P11
108	Xstartles	2038	34.9206	All	p11_190921_191002_191002_a001	190921_191002	P11
109	Xstartles	2701	45.4545	All	p11_190921_191002_191002_a001	190921_191002	P11
110	Xstartles	5488	17.4603	All	p11_190921_191002_191002_a001	190921_191002	P11
111	Xstartles	5534	46.6667	All	p11_190921_191002_191002_a001	190921_191002	P11
112	Xstartles	7591	23.7288	All	p11_190921_191002_191002_a001	190921_191002	P11
113	Xstartles	11471	34.2857	All	p11_190921_191002_191002_a001	190921_191002	P11
114	Xtwitches	945	22.5806	All	p11_190921_191002_191002_a001	190921_191002	P11
115	Xtwitches	2126	39.3617	All	p11_190921_191002_191002_a001	190921_191002	P11
116	Xtwitches	2151	21.0526	All	p11_190921_191002_191002_a001	190921_191002	P11
117	Xtwitches	2764	10.3448	All	p11_190921_191002_191002_a001	190921_191002	P11
118	Xtwitches	3162	30.8642	All	p11_190921_191002_191002_a001	190921_191002	P11
119	Xtwitches	3375	27.6923	All	p11_190921_191002_191002_a001	190921_191002	P11
120	Xtwitches	5027	32.3529	All	p11_190921_191002_191002_a001	190921_191002	P11
121	Xtwitches	5658	37.7049	All	p11_190921_191002_191002_a001	190921_191002	P11
122	Xtwitches	6117	92.0635	All	p11_190921_191002_191002_a001	190921_191002	P11
123	Xtwitches	6474	47	All	p11_190921_191002_191002_a001	190921_191002	P11
124	Xtwitches	6735	23.8095	All	p11_190921_191002_191002_a001	190921_191002	P11
125	Xtwitches	7375	43.1034	All	p11_190921_191002_191002_a001	190921_191002	P11
126	Xtwitches	8158	14.2857	All	p11_190921_191002_191002_a001	190921_191002	P11
127	Xtwitches	8783	33.3333	All	p11_190921_191002_191002_a001	190921_191002	P11
128	Xtwitches	8946	38.7755	All	p11_190921_191002_191002_a001	190921_191002	P11
129	Xtwitches	9065	15.3846	All	p11_190921_191002_191002_a001	190921_191002	P11
130	Xtwitches	9144	48.4375	All	p11_190921_191002_191002_a001	190921_191002	P11
131	Xtwitches	9499	12.5	All	p11_190921_191002_191002_a001	190921_191002	P11
132	Xtwitches	9652	45.283	All	p11_190921_191002_191002_a001	190921_191002	P11
133	Xtwitches	11281	36.6337	All	p11_190921_191002_191002_a001	190921_191002	P11
134	Xtwitches	11582	42.3077	All	p11_190921_191002_191002_a001	190921_191002	P11
135	Xtwitches	11635	53.5714	All	p11_190921_191002_191002_a001	190921_191002	P11
136	Xtwitches	11812	22	All	p11_190921_191002_191002_a001	190921_191002	P11
137	Xtwitches	12013	27.5362	All	p11_190921_191002_191002_a001	190921_191002	P11
138	Xtwitches	12138	64.8649	All	p11_190921_191002_191002_a001	190921_191002	P11
139	Xtwitches	12361	42.1875	All	p11_190921_191002_191002_a001	190921_191002	P11
140	long_movement	160	26.087	All	p12_171029_171110_171110_a000	171029_171110	P12
141	long_movement	680	42.5532	All	p12_171029_171110_171110_a000	171029_171110	P12
142	long_movement	1515	36.1702	All	p12_171029_171110_171110_a000	171029_171110	P12
143	long_movement	1910	83.3333	All	p12_171029_171110_171110_a000	171029_171110	P12
144	long_movement	2281	36.7347	All	p12_171029_171110_171110_a000	171029_171110	P12
145	long_movement	2765	58.3333	All	p12_171029_171110_171110_a000	171029_171110	P12
146	long_movement	3006	23.913	All	p12_171029_171110_171110_a000	171029_171110	P12
147	long_movement	3348	28.3333	All	p12_171029_171110_171110_a000	171029_171110	P12
148	long_movement	3519	41.8605	All	p12_171029_171110_171110_a000	171029_171110	P12
149	long_movement	3701	19.469	All	p12_171029_171110_171110_a000	171029_171110	P12
150	long_movement	4016	33.3333	All	p12_171029_171110_171110_a000	171029_171110	P12
151	long_movement	4711	35.8974	All	p12_171029_171110_171110_a000	171029_171110	P12
152	long_movement	5189	33.3333	All	p12_171029_171110_171110_a000	171029_171110	P12
153	long_movement	5360	20.5128	All	p12_171029_171110_171110_a000	171029_171110	P12
154	long_movement	5785	42.8571	All	p12_171029_171110_171110_a000	171029_171110	P12
155	long_movement	5913	38.6667	All	p12_171029_171110_171110_a000	171029_171110	P12
156	long_movement	6381	42.4658	All	p12_171029_171110_171110_a000	171029_171110	P12
157	long_movement	6603	36.2416	All	p12_171029_171110_171110_a000	171029_171110	P12
158	long_movement	6872	30.4878	All	p12_171029_171110_171110_a000	171029_171110	P12
159	long_movement	7270	36.1446	All	p12_171029_171110_171110_a000	171029_171110	P12
160	long_movement	7581	33.3333	All	p12_171029_171110_171110_a000	171029_171110	P12
161	long_movement	7692	62.5	All	p12_171029_171110_171110_a000	171029_171110	P12
162	long_movement	8101	58.9474	All	p12_171029_171110_171110_a000	171029_171110	P12
163	long_movement	8453	66.4062	All	p12_171029_171110_171110_a000	171029_171110	P12
164	long_movement	8632	51.3514	All	p12_171029_171110_171110_a000	171029_171110	P12
165	long_movement	8925	47	All	p12_171029_171110_171110_a000	171029_171110	P12
166	long_movement	9140	60.241	All	p12_171029_171110_171110_a000	171029_171110	P12
167	long_movement	9375	43.8017	All	p12_171029_171110_171110_a000	171029_171110	P12
168	long_movement	9535	65.7143	All	p12_171029_171110_171110_a000	171029_171110	P12
169	long_movement	9660	45.5696	All	p12_171029_171110_171110_a000	171029_171110	P12
170	long_movement	9870	59.4059	All	p12_171029_171110_171110_a000	171029_171110	P12
171	long_movement	10257	42.8571	All	p12_171029_171110_171110_a000	171029_171110	P12
172	long_movement	10860	27.4194	All	p12_171029_171110_171110_a000	171029_171110	P12
173	long_movement	11565	44.7761	All	p12_171029_171110_171110_a000	171029_171110	P12
174	long_movement	11968	36.9565	All	p12_171029_171110_171110_a000	171029_171110	P12
175	Cmplx_movements	771	56	All	p12_190828_190909_190909_a000	190828_190909	P12
176	Cmplx_movements	1099	34.2857	All	p12_190828_190909_190909_a000	190828_190909	P12
177	Cmplx_movements	1153	68.2927	All	p12_190828_190909_190909_a000	190828_190909	P12
178	Cmplx_movements	1641	30	All	p12_190828_190909_190909_a000	190828_190909	P12
179	Cmplx_movements	1785	46.7742	All	p12_190828_190909_190909_a000	190828_190909	P12
180	Cmplx_movements	2227	42.8571	All	p12_190828_190909_190909_a000	190828_190909	P12
181	Cmplx_movements	2426	62.2642	All	p12_190828_190909_190909_a000	190828_190909	P12
182	Cmplx_movements	3181	32.8571	All	p12_190828_190909_190909_a000	190828_190909	P12
183	Cmplx_movements	3665	42.1687	All	p12_190828_190909_190909_a000	190828_190909	P12
184	Cmplx_movements	3702	60	All	p12_190828_190909_190909_a000	190828_190909	P12
185	Cmplx_movements	3955	25.3731	All	p12_190828_190909_190909_a000	190828_190909	P12
186	Cmplx_movements	4186	36.2319	All	p12_190828_190909_190909_a000	190828_190909	P12
187	Cmplx_movements	4296	23.0769	All	p12_190828_190909_190909_a000	190828_190909	P12
188	Cmplx_movements	4428	34.5455	All	p12_190828_190909_190909_a000	190828_190909	P12
189	Cmplx_movements	4563	51.1628	All	p12_190828_190909_190909_a000	190828_190909	P12
190	Cmplx_movements	4658	41.6667	All	p12_190828_190909_190909_a000	190828_190909	P12
191	Cmplx_movements	8657	36.2069	All	p12_190828_190909_190909_a000	190828_190909	P12
192	Cmplx_movements	9033	42.6966	All	p12_190828_190909_190909_a000	190828_190909	P12
193	Cmplx_movements	9630	40	All	p12_190828_190909_190909_a000	190828_190909	P12
194	Cmplx_movements	9818	29.5082	All	p12_190828_190909_190909_a000	190828_190909	P12
195	Cmplx_movements	10171	46.5517	All	p12_190828_190909_190909_a000	190828_190909	P12
196	Cmplx_movements	10429	52.1739	All	p12_190828_190909_190909_a000	190828_190909	P12
197	Cmplx_movements	10899	49.1525	All	p12_190828_190909_190909_a000	190828_190909	P12
198	Cmplx_movements	11080	31.3953	All	p12_190828_190909_190909_a000	190828_190909	P12
199	Cmplx_movements	11431	34.8837	All	p12_190828_190909_190909_a000	190828_190909	P12
200	Cmplx_movements	11621	54.1667	All	p12_190828_190909_190909_a000	190828_190909	P12
201	Cmplx_movements	11677	54.1667	All	p12_190828_190909_190909_a000	190828_190909	P12
202	Cmplx_movements	11936	57.1429	All	p12_190828_190909_190909_a000	190828_190909	P12
203	Cmplx_movements	12030	55.5556	All	p12_190828_190909_190909_a000	190828_190909	P12
204	Startle	526	32	All	p12_190828_190909_190909_a000	190828_190909	P12
205	Startle	5728	48.8889	All	p12_190828_190909_190909_a000	190828_190909	P12
206	Startle	5909	30	All	p12_190828_190909_190909_a000	190828_190909	P12
207	Startle	6390	44.898	All	p12_190828_190909_190909_a000	190828_190909	P12
208	Startle	7450	43.5484	All	p12_190828_190909_190909_a000	190828_190909	P12
209	Startle	8855	34.5455	All	p12_190828_190909_190909_a000	190828_190909	P12
210	Startle	8958	35	All	p12_190828_190909_190909_a000	190828_190909	P12
211	Startle	9232	33.3333	All	p12_190828_190909_190909_a000	190828_190909	P12
212	Startle	9311	35.6322	All	p12_190828_190909_190909_a000	190828_190909	P12
213	Startle	9900	32.1429	All	p12_190828_190909_190909_a000	190828_190909	P12
214	Startle	9973	26.087	All	p12_190828_190909_190909_a000	190828_190909	P12
215	Startle	10885	58.3333	All	p12_190828_190909_190909_a000	190828_190909	P12
216	Twitches	371	23.6842	All	p12_190828_190909_190909_a000	190828_190909	P12
217	Twitches	646	26.087	All	p12_190828_190909_190909_a000	190828_190909	P12
218	Twitches	739	29.8507	All	p12_190828_190909_190909_a000	190828_190909	P12
219	Twitches	1908	31.3433	All	p12_190828_190909_190909_a000	190828_190909	P12
220	Twitches	2012	57.7778	All	p12_190828_190909_190909_a000	190828_190909	P12
221	Twitches	2586	42.3729	All	p12_190828_190909_190909_a000	190828_190909	P12
222	Twitches	3350	22.2222	All	p12_190828_190909_190909_a000	190828_190909	P12
223	Twitches	3419	40.8163	All	p12_190828_190909_190909_a000	190828_190909	P12
224	Twitches	3527	31.1688	All	p12_190828_190909_190909_a000	190828_190909	P12
225	Twitches	3646	66.6667	All	p12_190828_190909_190909_a000	190828_190909	P12
226	Twitches	4716	35	All	p12_190828_190909_190909_a000	190828_190909	P12
227	Twitches	4932	44	All	p12_190828_190909_190909_a000	190828_190909	P12
228	Twitches	5209	26.087	All	p12_190828_190909_190909_a000	190828_190909	P12
229	Twitches	5415	31.1475	All	p12_190828_190909_190909_a000	190828_190909	P12
230	Twitches	5519	32.4675	All	p12_190828_190909_190909_a000	190828_190909	P12
231	Twitches	5540	45.1613	All	p12_190828_190909_190909_a000	190828_190909	P12
232	Twitches	5560	45.8333	All	p12_190828_190909_190909_a000	190828_190909	P12
233	Twitches	5971	48.5714	All	p12_190828_190909_190909_a000	190828_190909	P12
234	Twitches	6033	39.6226	All	p12_190828_190909_190909_a000	190828_190909	P12
235	Twitches	6082	40.4762	All	p12_190828_190909_190909_a000	190828_190909	P12
236	Twitches	6243	28.75	All	p12_190828_190909_190909_a000	190828_190909	P12
237	Twitches	6476	26.5625	All	p12_190828_190909_190909_a000	190828_190909	P12
238	Twitches	6603	27.907	All	p12_190828_190909_190909_a000	190828_190909	P12
239	Twitches	6902	34.8837	All	p12_190828_190909_190909_a000	190828_190909	P12
240	Twitches	6922	63.4146	All	p12_190828_190909_190909_a000	190828_190909	P12
241	Twitches	7298	42.1875	All	p12_190828_190909_190909_a000	190828_190909	P12
242	Twitches	7443	44.4444	All	p12_190828_190909_190909_a000	190828_190909	P12
243	Twitches	7618	32.1429	All	p12_190828_190909_190909_a000	190828_190909	P12
244	Twitches	7710	31.8182	All	p12_190828_190909_190909_a000	190828_190909	P12
245	Twitches	7854	48.9362	All	p12_190828_190909_190909_a000	190828_190909	P12
246	Twitches	7926	32.6531	All	p12_190828_190909_190909_a000	190828_190909	P12
247	Twitches	8102	27.7778	All	p12_190828_190909_190909_a000	190828_190909	P12
248	Twitches	8304	44.7368	All	p12_190828_190909_190909_a000	190828_190909	P12
249	Twitches	9375	43.4783	All	p12_190828_190909_190909_a000	190828_190909	P12
250	Twitches	9432	48.4375	All	p12_190828_190909_190909_a000	190828_190909	P12
251	Twitches	10052	25.3521	All	p12_190828_190909_190909_a000	190828_190909	P12
252	Twitches	10097	44.186	All	p12_190828_190909_190909_a000	190828_190909	P12
253	Walk-Run	11828	49.0566	All	p12_190828_190909_190909_a000	190828_190909	P12
254	Walk-Run	11920	65.3846	All	p12_190828_190909_190909_a000	190828_190909	P12
255	Walk-Run	11987	62.5	All	p12_190828_190909_190909_a000	190828_190909	P12
256	Walk-Run	12183	60.7843	All	p12_190828_190909_190909_a000	190828_190909	P12
257	Walk-Run	12362	73.8095	All	p12_190828_190909_190909_a000	190828_190909	P12
258	Cmplx_movements	3125	37.7049	All	p12_190828_190909_190909_a001	190828_190909	P12
259	Cmplx_movements	3250	50	All	p12_190828_190909_190909_a001	190828_190909	P12
260	Cmplx_movements	4185	39	All	p12_190828_190909_190909_a001	190828_190909	P12
261	Cmplx_movements	5613	36.9565	All	p12_190828_190909_190909_a001	190828_190909	P12
262	Cmplx_movements	5955	20.9877	All	p12_190828_190909_190909_a001	190828_190909	P12
263	Cmplx_movements	6129	59.6154	All	p12_190828_190909_190909_a001	190828_190909	P12
264	Cmplx_movements	6836	28.8288	All	p12_190828_190909_190909_a001	190828_190909	P12
265	Cmplx_movements	6950	25.3968	All	p12_190828_190909_190909_a001	190828_190909	P12
266	Cmplx_movements	7096	28.7671	All	p12_190828_190909_190909_a001	190828_190909	P12
267	Cmplx_movements	7247	23.7288	All	p12_190828_190909_190909_a001	190828_190909	P12
268	Cmplx_movements	7377	42.5	All	p12_190828_190909_190909_a001	190828_190909	P12
269	Cmplx_movements	8420	74.4681	All	p12_190828_190909_190909_a001	190828_190909	P12
270	Cmplx_movements	8591	39.6226	All	p12_190828_190909_190909_a001	190828_190909	P12
271	Cmplx_movements	8714	26.3889	All	p12_190828_190909_190909_a001	190828_190909	P12
272	Cmplx_movements	8827	65.1163	All	p12_190828_190909_190909_a001	190828_190909	P12
273	Cmplx_movements	9451	42.623	All	p12_190828_190909_190909_a001	190828_190909	P12
274	Cmplx_movements	9656	50	All	p12_190828_190909_190909_a001	190828_190909	P12
275	Cmplx_movements	10032	38.3721	All	p12_190828_190909_190909_a001	190828_190909	P12
276	Cmplx_movements	10136	40.4255	All	p12_190828_190909_190909_a001	190828_190909	P12
277	Cmplx_movements	10752	69.8113	All	p12_190828_190909_190909_a001	190828_190909	P12
278	Cmplx_movements	10985	68.0556	All	p12_190828_190909_190909_a001	190828_190909	P12
279	Cmplx_movements	11443	30.7692	All	p12_190828_190909_190909_a001	190828_190909	P12
280	Cmplx_movements	12142	62.5	All	p12_190828_190909_190909_a001	190828_190909	P12
281	Cmplx_movements	12337	27.0492	All	p12_190828_190909_190909_a001	190828_190909	P12
282	Startle	320	47.619	All	p12_190828_190909_190909_a001	190828_190909	P12
283	Startle	3064	47.3684	All	p12_190828_190909_190909_a001	190828_190909	P12
284	Startle	3119	60.9375	All	p12_190828_190909_190909_a001	190828_190909	P12
285	Startle	3324	37.3333	All	p12_190828_190909_190909_a001	190828_190909	P12
286	Startle	4331	35.4839	All	p12_190828_190909_190909_a001	190828_190909	P12
287	Startle	4611	25.9259	All	p12_190828_190909_190909_a001	190828_190909	P12
288	Startle	4962	29.4737	All	p12_190828_190909_190909_a001	190828_190909	P12
289	Startle	6739	41.4634	All	p12_190828_190909_190909_a001	190828_190909	P12
290	Startle	7634	31.5068	All	p12_190828_190909_190909_a001	190828_190909	P12
291	Startle	12120	40	All	p12_190828_190909_190909_a001	190828_190909	P12
292	Twitches	846	35.8974	All	p12_190828_190909_190909_a001	190828_190909	P12
293	Twitches	1005	26.5957	All	p12_190828_190909_190909_a001	190828_190909	P12
294	Twitches	1479	40.8163	All	p12_190828_190909_190909_a001	190828_190909	P12
295	Twitches	1548	46.8085	All	p12_190828_190909_190909_a001	190828_190909	P12
296	Twitches	1564	35.7143	All	p12_190828_190909_190909_a001	190828_190909	P12
297	Twitches	1652	36.3636	All	p12_190828_190909_190909_a001	190828_190909	P12
298	Twitches	1800	38.2979	All	p12_190828_190909_190909_a001	190828_190909	P12
299	Twitches	1898	41.3462	All	p12_190828_190909_190909_a001	190828_190909	P12
300	Twitches	1973	35.7143	All	p12_190828_190909_190909_a001	190828_190909	P12
301	Twitches	2029	71.6418	All	p12_190828_190909_190909_a001	190828_190909	P12
302	Twitches	2051	37.7193	All	p12_190828_190909_190909_a001	190828_190909	P12
303	Twitches	2125	55.7377	All	p12_190828_190909_190909_a001	190828_190909	P12
304	Twitches	2164	58.0645	All	p12_190828_190909_190909_a001	190828_190909	P12
305	Twitches	2438	50	All	p12_190828_190909_190909_a001	190828_190909	P12
306	Twitches	2670	55.9322	All	p12_190828_190909_190909_a001	190828_190909	P12
307	Twitches	2702	56.4103	All	p12_190828_190909_190909_a001	190828_190909	P12
308	Twitches	2780	50.7042	All	p12_190828_190909_190909_a001	190828_190909	P12
309	Twitches	2874	26.5823	All	p12_190828_190909_190909_a001	190828_190909	P12
310	Twitches	3375	71.1111	All	p12_190828_190909_190909_a001	190828_190909	P12
311	Twitches	3478	34.375	All	p12_190828_190909_190909_a001	190828_190909	P12
312	Twitches	3745	40	All	p12_190828_190909_190909_a001	190828_190909	P12
313	Twitches	3762	60	All	p12_190828_190909_190909_a001	190828_190909	P12
314	Twitches	4028	48.9362	All	p12_190828_190909_190909_a001	190828_190909	P12
315	Twitches	4103	42.029	All	p12_190828_190909_190909_a001	190828_190909	P12
316	Twitches	4124	46.0317	All	p12_190828_190909_190909_a001	190828_190909	P12
317	Twitches	5093	27.7778	All	p12_190828_190909_190909_a001	190828_190909	P12
318	Twitches	5222	53.8462	All	p12_190828_190909_190909_a001	190828_190909	P12
319	Twitches	5761	31.1475	All	p12_190828_190909_190909_a001	190828_190909	P12
320	Twitches	8118	34.9398	All	p12_190828_190909_190909_a001	190828_190909	P12
321	Twitches	8283	35.3659	All	p12_190828_190909_190909_a001	190828_190909	P12
322	Twitches	8396	50	All	p12_190828_190909_190909_a001	190828_190909	P12
323	Twitches	8983	26.7327	All	p12_190828_190909_190909_a001	190828_190909	P12
324	Twitches	9277	34.9206	All	p12_190828_190909_190909_a001	190828_190909	P12
325	Twitches	9419	59.1304	All	p12_190828_190909_190909_a001	190828_190909	P12
326	Xcomplexe_movements	827	45.122	All	p12_190911_190923_190923_a001	190911_190923	P12
327	Xcomplexe_movements	2960	46.875	All	p12_190911_190923_190923_a001	190911_190923	P12
328	Xcomplexe_movements	2980	42.8571	All	p12_190911_190923_190923_a001	190911_190923	P12
329	Xcomplexe_movements	3034	59.5745	All	p12_190911_190923_190923_a001	190911_190923	P12
330	Xcomplexe_movements	3077	53.3333	All	p12_190911_190923_190923_a001	190911_190923	P12
331	Xcomplexe_movements	4548	52.809	All	p12_190911_190923_190923_a001	190911_190923	P12
332	Xcomplexe_movements	5740	56.3107	All	p12_190911_190923_190923_a001	190911_190923	P12
333	Xcomplexe_movements	5777	65.8537	All	p12_190911_190923_190923_a001	190911_190923	P12
334	Xcomplexe_movements	6265	39.1304	All	p12_190911_190923_190923_a001	190911_190923	P12
335	Xcomplexe_movements	6485	56.7164	All	p12_190911_190923_190923_a001	190911_190923	P12
336	Xcomplexe_movements	8055	43	All	p12_190911_190923_190923_a001	190911_190923	P12
337	Xcomplexe_movements	8300	40.5405	All	p12_190911_190923_190923_a001	190911_190923	P12
338	Xcomplexe_movements	8432	44.1558	All	p12_190911_190923_190923_a001	190911_190923	P12
339	Xcomplexe_movements	8763	53.7313	All	p12_190911_190923_190923_a001	190911_190923	P12
340	Xcomplexe_movements	10252	38.3562	All	p12_190911_190923_190923_a001	190911_190923	P12
341	Xcomplexe_movements	10337	63.0435	All	p12_190911_190923_190923_a001	190911_190923	P12
342	Xcomplexe_movements	10594	35.2941	All	p12_190911_190923_190923_a001	190911_190923	P12
343	Xcomplexe_movements	10771	41.791	All	p12_190911_190923_190923_a001	190911_190923	P12
344	Xcomplexe_movements	11513	37.9747	All	p12_190911_190923_190923_a001	190911_190923	P12
345	Xcomplexe_movements	11694	21.9512	All	p12_190911_190923_190923_a001	190911_190923	P12
346	Xcomplexe_movements	12029	41.3793	All	p12_190911_190923_190923_a001	190911_190923	P12
347	Xrun_walk	3012	46.5116	All	p12_190911_190923_190923_a001	190911_190923	P12
348	Xrun_walk	3066	50.9434	All	p12_190911_190923_190923_a001	190911_190923	P12
349	Xrun_walk	10313	40	All	p12_190911_190923_190923_a001	190911_190923	P12
350	Xrun_walk	10353	53.125	All	p12_190911_190923_190923_a001	190911_190923	P12
351	Xstartles	3986	39.4737	All	p12_190911_190923_190923_a001	190911_190923	P12
352	Xstartles	4734	29.5775	All	p12_190911_190923_190923_a001	190911_190923	P12
353	Xstartles	4882	44.4444	All	p12_190911_190923_190923_a001	190911_190923	P12
354	Xstartles	5511	51.7647	All	p12_190911_190923_190923_a001	190911_190923	P12
355	Xstartles	5572	48.6111	All	p12_190911_190923_190923_a001	190911_190923	P12
356	Xstartles	5990	38.6667	All	p12_190911_190923_190923_a001	190911_190923	P12
357	Xstartles	6205	43.2836	All	p12_190911_190923_190923_a001	190911_190923	P12
358	Xstartles	6600	52.2388	All	p12_190911_190923_190923_a001	190911_190923	P12
359	Xstartles	7018	51.4286	All	p12_190911_190923_190923_a001	190911_190923	P12
360	Xstartles	8542	49.2308	All	p12_190911_190923_190923_a001	190911_190923	P12
361	Xstartles	8694	34.8485	All	p12_190911_190923_190923_a001	190911_190923	P12
362	Xstartles	8968	28.8889	All	p12_190911_190923_190923_a001	190911_190923	P12
363	Xstartles	9036	40.2299	All	p12_190911_190923_190923_a001	190911_190923	P12
364	Xstartles	9533	34.4828	All	p12_190911_190923_190923_a001	190911_190923	P12
365	Xstartles	9573	50.6667	All	p12_190911_190923_190923_a001	190911_190923	P12
366	Xstartles	10928	35.7143	All	p12_190911_190923_190923_a001	190911_190923	P12
367	Xstartles	11350	30.7692	All	p12_190911_190923_190923_a001	190911_190923	P12
368	Xstartles	12452	51.9481	All	p12_190911_190923_190923_a001	190911_190923	P12
369	Xtwitches	544	34.5455	All	p12_190911_190923_190923_a001	190911_190923	P12
370	Xtwitches	1157	42.3729	All	p12_190911_190923_190923_a001	190911_190923	P12
371	Xtwitches	1269	44.5783	All	p12_190911_190923_190923_a001	190911_190923	P12
372	Xtwitches	1398	81.25	All	p12_190911_190923_190923_a001	190911_190923	P12
373	Xtwitches	1536	44.1558	All	p12_190911_190923_190923_a001	190911_190923	P12
374	Xtwitches	1644	30.8824	All	p12_190911_190923_190923_a001	190911_190923	P12
375	Xtwitches	1768	26.1538	All	p12_190911_190923_190923_a001	190911_190923	P12
376	Xtwitches	1909	60.4651	All	p12_190911_190923_190923_a001	190911_190923	P12
377	Xtwitches	1999	36.6667	All	p12_190911_190923_190923_a001	190911_190923	P12
378	Xtwitches	2189	26.9663	All	p12_190911_190923_190923_a001	190911_190923	P12
379	Xtwitches	2286	38.7097	All	p12_190911_190923_190923_a001	190911_190923	P12
380	Xtwitches	2709	42.6667	All	p12_190911_190923_190923_a001	190911_190923	P12
381	Xtwitches	2865	25.6098	All	p12_190911_190923_190923_a001	190911_190923	P12
382	Xtwitches	2934	49.505	All	p12_190911_190923_190923_a001	190911_190923	P12
383	Xtwitches	3924	27.2727	All	p12_190911_190923_190923_a001	190911_190923	P12
384	Xtwitches	4137	43.2432	All	p12_190911_190923_190923_a001	190911_190923	P12
385	Xtwitches	4228	31.3433	All	p12_190911_190923_190923_a001	190911_190923	P12
386	Xtwitches	4397	30.8824	All	p12_190911_190923_190923_a001	190911_190923	P12
387	Xtwitches	4476	42.3529	All	p12_190911_190923_190923_a001	190911_190923	P12
388	Xtwitches	5152	28.3784	All	p12_190911_190923_190923_a001	190911_190923	P12
389	Xtwitches	5221	44	All	p12_190911_190923_190923_a001	190911_190923	P12
390	Xtwitches	5278	36.9048	All	p12_190911_190923_190923_a001	190911_190923	P12
391	Xtwitches	5372	36.3636	All	p12_190911_190923_190923_a001	190911_190923	P12
392	Xtwitches	5924	34.2105	All	p12_190911_190923_190923_a001	190911_190923	P12
393	Xtwitches	6072	35.5263	All	p12_190911_190923_190923_a001	190911_190923	P12
394	Xtwitches	6102	66.6667	All	p12_190911_190923_190923_a001	190911_190923	P12
395	Xtwitches	6111	73.2673	All	p12_190911_190923_190923_a001	190911_190923	P12
396	Xtwitches	6358	44.4444	All	p12_190911_190923_190923_a001	190911_190923	P12
397	Xtwitches	6662	36.1446	All	p12_190911_190923_190923_a001	190911_190923	P12
398	Xtwitches	6785	38.9831	All	p12_190911_190923_190923_a001	190911_190923	P12
399	Xtwitches	6870	32.2581	All	p12_190911_190923_190923_a001	190911_190923	P12
400	Xtwitches	7092	32.9787	All	p12_190911_190923_190923_a001	190911_190923	P12
401	Xtwitches	7196	66.1017	All	p12_190911_190923_190923_a001	190911_190923	P12
402	Xtwitches	7233	43.2432	All	p12_190911_190923_190923_a001	190911_190923	P12
403	Xtwitches	7409	44.5545	All	p12_190911_190923_190923_a001	190911_190923	P12
404	Xtwitches	7413	44.086	All	p12_190911_190923_190923_a001	190911_190923	P12
405	Xtwitches	7993	48.7805	All	p12_190911_190923_190923_a001	190911_190923	P12
406	Xtwitches	8245	49.3671	All	p12_190911_190923_190923_a001	190911_190923	P12
407	Xtwitches	8610	34.0659	All	p12_190911_190923_190923_a001	190911_190923	P12
408	Xtwitches	8641	58.9744	All	p12_190911_190923_190923_a001	190911_190923	P12
409	Xtwitches	8883	30.4348	All	p12_190911_190923_190923_a001	190911_190923	P12
410	Xtwitches	9203	40	All	p12_190911_190923_190923_a001	190911_190923	P12
411	Xtwitches	9308	34.4086	All	p12_190911_190923_190923_a001	190911_190923	P12
412	Xtwitches	9458	41.6667	All	p12_190911_190923_190923_a001	190911_190923	P12
413	Xtwitches	9485	46.5116	All	p12_190911_190923_190923_a001	190911_190923	P12
414	Xtwitches	9869	29.1667	All	p12_190911_190923_190923_a001	190911_190923	P12
415	Xtwitches	10084	62.6506	All	p12_190911_190923_190923_a001	190911_190923	P12
416	Xtwitches	10107	31.7073	All	p12_190911_190923_190923_a001	190911_190923	P12
417	Xtwitches	10166	39.759	All	p12_190911_190923_190923_a001	190911_190923	P12
418	Xtwitches	11437	33.75	All	p12_190911_190923_190923_a001	190911_190923	P12
419	Xtwitches	11689	36.3636	All	p12_190911_190923_190923_a001	190911_190923	P12
420	Xtwitches	12199	30.5556	All	p12_190911_190923_190923_a001	190911_190923	P12
421	Xtwitches	12277	30.5556	All	p12_190911_190923_190923_a001	190911_190923	P12
422	Xtwitches	12356	40.9091	All	p12_190911_190923_190923_a001	190911_190923	P12
423	Cmplx_movements	64	36.3636	All	p12_190921_191003_191003_a001	190921_191003	P12
424	Cmplx_movements	353	50	All	p12_190921_191003_191003_a001	190921_191003	P12
425	Cmplx_movements	1060	25	All	p12_190921_191003_191003_a001	190921_191003	P12
426	Cmplx_movements	1856	18.75	All	p12_190921_191003_191003_a001	190921_191003	P12
427	Cmplx_movements	3003	28.5714	All	p12_190921_191003_191003_a001	190921_191003	P12
428	Cmplx_movements	3290	51.2821	All	p12_190921_191003_191003_a001	190921_191003	P12
429	Cmplx_movements	3559	41.9355	All	p12_190921_191003_191003_a001	190921_191003	P12
430	Cmplx_movements	3992	34.1463	All	p12_190921_191003_191003_a001	190921_191003	P12
431	Cmplx_movements	4124	37.5	All	p12_190921_191003_191003_a001	190921_191003	P12
432	Cmplx_movements	4504	33.3333	All	p12_190921_191003_191003_a001	190921_191003	P12
433	Cmplx_movements	4821	50	All	p12_190921_191003_191003_a001	190921_191003	P12
434	Cmplx_movements	4953	53.4884	All	p12_190921_191003_191003_a001	190921_191003	P12
435	Cmplx_movements	5381	54.8387	All	p12_190921_191003_191003_a001	190921_191003	P12
436	Cmplx_movements	5510	46.6667	All	p12_190921_191003_191003_a001	190921_191003	P12
437	Cmplx_movements	5670	37.8378	All	p12_190921_191003_191003_a001	190921_191003	P12
438	Cmplx_movements	5829	42.8571	All	p12_190921_191003_191003_a001	190921_191003	P12
439	Cmplx_movements	6346	40.4255	All	p12_190921_191003_191003_a001	190921_191003	P12
440	Cmplx_movements	6438	18.5185	All	p12_190921_191003_191003_a001	190921_191003	P12
441	Cmplx_movements	6514	37.5	All	p12_190921_191003_191003_a001	190921_191003	P12
442	Cmplx_movements	6629	55.2632	All	p12_190921_191003_191003_a001	190921_191003	P12
443	Cmplx_movements	6826	35.1351	All	p12_190921_191003_191003_a001	190921_191003	P12
444	Cmplx_movements	6956	41.4634	All	p12_190921_191003_191003_a001	190921_191003	P12
445	Cmplx_movements	7341	21.6216	All	p12_190921_191003_191003_a001	190921_191003	P12
446	Cmplx_movements	9629	54.8387	All	p12_190921_191003_191003_a001	190921_191003	P12
447	Cmplx_movements	9752	53.8462	All	p12_190921_191003_191003_a001	190921_191003	P12
448	Cmplx_movements	11230	51.8519	All	p12_190921_191003_191003_a001	190921_191003	P12
449	Cmplx_movements	11283	27.907	All	p12_190921_191003_191003_a001	190921_191003	P12
450	Cmplx_movements	12186	45.4545	All	p12_190921_191003_191003_a001	190921_191003	P12
451	Startle	1637	38.2353	All	p12_190921_191003_191003_a001	190921_191003	P12
452	Startle	3859	34.8837	All	p12_190921_191003_191003_a001	190921_191003	P12
453	Startle	3932	46.3415	All	p12_190921_191003_191003_a001	190921_191003	P12
454	Startle	5764	33.3333	All	p12_190921_191003_191003_a001	190921_191003	P12
455	Startle	5917	46.3415	All	p12_190921_191003_191003_a001	190921_191003	P12
456	Startle	5990	45.283	All	p12_190921_191003_191003_a001	190921_191003	P12
457	Startle	6107	44.6809	All	p12_190921_191003_191003_a001	190921_191003	P12
458	Startle	7017	40.4255	All	p12_190921_191003_191003_a001	190921_191003	P12
459	Startle	7157	32.6531	All	p12_190921_191003_191003_a001	190921_191003	P12
460	Startle	7201	16.129	All	p12_190921_191003_191003_a001	190921_191003	P12
461	Startle	10096	53.8462	All	p12_190921_191003_191003_a001	190921_191003	P12
462	Startle	10229	86.9565	All	p12_190921_191003_191003_a001	190921_191003	P12
463	Startle	10529	25.7143	All	p12_190921_191003_191003_a001	190921_191003	P12
464	Twitches	526	52.6316	All	p12_190921_191003_191003_a001	190921_191003	P12
465	Twitches	1301	54.902	All	p12_190921_191003_191003_a001	190921_191003	P12
466	Twitches	1488	50	All	p12_190921_191003_191003_a001	190921_191003	P12
467	Twitches	7084	31.25	All	p12_190921_191003_191003_a001	190921_191003	P12
468	Twitches	7260	48.0769	All	p12_190921_191003_191003_a001	190921_191003	P12
469	Twitches	7453	60	All	p12_190921_191003_191003_a001	190921_191003	P12
470	Twitches	7971	21.9512	All	p12_190921_191003_191003_a001	190921_191003	P12
471	Twitches	8082	54.5455	All	p12_190921_191003_191003_a001	190921_191003	P12
472	Twitches	8225	26.6667	All	p12_190921_191003_191003_a001	190921_191003	P12
473	Twitches	8275	24.5283	All	p12_190921_191003_191003_a001	190921_191003	P12
474	Twitches	9558	56.25	All	p12_190921_191003_191003_a001	190921_191003	P12
475	Twitches	10020	25	All	p12_190921_191003_191003_a001	190921_191003	P12
476	Twitches	10201	50.9434	All	p12_190921_191003_191003_a001	190921_191003	P12
477	Twitches	10583	52.6316	All	p12_190921_191003_191003_a001	190921_191003	P12
478	Twitches	10842	40.5405	All	p12_190921_191003_191003_a001	190921_191003	P12
479	Twitches	10958	41.0256	All	p12_190921_191003_191003_a001	190921_191003	P12
480	Twitches	11214	48.4848	All	p12_190921_191003_191003_a001	190921_191003	P12
481	Twitches	11404	50	All	p12_190921_191003_191003_a001	190921_191003	P12
482	Twitches	11664	63.4146	All	p12_190921_191003_191003_a001	190921_191003	P12
483	Twitches	12060	63.2353	All	p12_190921_191003_191003_a001	190921_191003	P12
484	Twitches	12180	30.3371	All	p12_190921_191003_191003_a001	190921_191003	P12
485	Twitches	12344	78.8732	All	p12_190921_191003_191003_a001	190921_191003	P12
486	Twitches	12377	37.5	All	p12_190921_191003_191003_a001	190921_191003	P12
487	Twitches	12473	50	All	p12_190921_191003_191003_a001	190921_191003	P12
488	Xcomplexe_movements	735	35.1064	All	p12_191122_191204_191204_a000	191122_191204	P12
489	Xcomplexe_movements	1703	33.6634	All	p12_191122_191204_191204_a000	191122_191204	P12
490	Xcomplexe_movements	3005	43.0556	All	p12_191122_191204_191204_a000	191122_191204	P12
491	Xcomplexe_movements	3555	32.3944	All	p12_191122_191204_191204_a000	191122_191204	P12
492	Xcomplexe_movements	3957	24.1071	All	p12_191122_191204_191204_a000	191122_191204	P12
493	Xcomplexe_movements	4449	39.0244	All	p12_191122_191204_191204_a000	191122_191204	P12
494	Xcomplexe_movements	5347	22.8261	All	p12_191122_191204_191204_a000	191122_191204	P12
495	Xcomplexe_movements	5630	23.6111	All	p12_191122_191204_191204_a000	191122_191204	P12
496	Xcomplexe_movements	5841	32.4561	All	p12_191122_191204_191204_a000	191122_191204	P12
497	Xcomplexe_movements	6441	31.3953	All	p12_191122_191204_191204_a000	191122_191204	P12
498	Xcomplexe_movements	6738	23.5294	All	p12_191122_191204_191204_a000	191122_191204	P12
499	Xcomplexe_movements	6919	45.7447	All	p12_191122_191204_191204_a000	191122_191204	P12
500	Xcomplexe_movements	7065	40	All	p12_191122_191204_191204_a000	191122_191204	P12
501	Xcomplexe_movements	7404	33.0579	All	p12_191122_191204_191204_a000	191122_191204	P12
502	Xcomplexe_movements	7472	63.4921	All	p12_191122_191204_191204_a000	191122_191204	P12
503	Xcomplexe_movements	8106	34.1772	All	p12_191122_191204_191204_a000	191122_191204	P12
504	Xcomplexe_movements	8312	31.3953	All	p12_191122_191204_191204_a000	191122_191204	P12
505	Xcomplexe_movements	9357	36.7347	All	p12_191122_191204_191204_a000	191122_191204	P12
506	Xcomplexe_movements	9719	40.9836	All	p12_191122_191204_191204_a000	191122_191204	P12
507	Xcomplexe_movements	10659	32.6087	All	p12_191122_191204_191204_a000	191122_191204	P12
508	Xcomplexe_movements	10947	45.7143	All	p12_191122_191204_191204_a000	191122_191204	P12
509	Xcomplexe_movements	11035	59.7222	All	p12_191122_191204_191204_a000	191122_191204	P12
510	Xcomplexe_movements	11111	37.931	All	p12_191122_191204_191204_a000	191122_191204	P12
511	Xrun_walk	7114	45	All	p12_191122_191204_191204_a000	191122_191204	P12
512	Xrun_walk	7447	56.3218	All	p12_191122_191204_191204_a000	191122_191204	P12
513	Xrun_walk	8420	66.1017	All	p12_191122_191204_191204_a000	191122_191204	P12
514	Xrun_walk	10891	25	All	p12_191122_191204_191204_a000	191122_191204	P12
515	Xrun_walk	11010	41.8919	All	p12_191122_191204_191204_a000	191122_191204	P12
516	Xrun_walk	11066	57.5	All	p12_191122_191204_191204_a000	191122_191204	P12
517	Xstartles	2211	31.4961	All	p12_191122_191204_191204_a000	191122_191204	P12
518	Xstartles	9295	11.828	All	p12_191122_191204_191204_a000	191122_191204	P12
519	Xtwitches	902	21.1111	All	p12_191122_191204_191204_a000	191122_191204	P12
520	Xtwitches	1400	43.956	All	p12_191122_191204_191204_a000	191122_191204	P12
521	Xtwitches	2564	28.2051	All	p12_191122_191204_191204_a000	191122_191204	P12
522	Xtwitches	2828	32.6087	All	p12_191122_191204_191204_a000	191122_191204	P12
523	Xtwitches	4335	15.8333	All	p12_191122_191204_191204_a000	191122_191204	P12
524	Xtwitches	5115	26.8116	All	p12_191122_191204_191204_a000	191122_191204	P12
525	Xtwitches	5625	25.8929	All	p12_191122_191204_191204_a000	191122_191204	P12
526	Xtwitches	6057	25.8824	All	p12_191122_191204_191204_a000	191122_191204	P12
527	Xtwitches	6123	31.4815	All	p12_191122_191204_191204_a000	191122_191204	P12
528	Xtwitches	6208	46	All	p12_191122_191204_191204_a000	191122_191204	P12
529	Xtwitches	6272	40.4255	All	p12_191122_191204_191204_a000	191122_191204	P12
530	Xtwitches	6435	28	All	p12_191122_191204_191204_a000	191122_191204	P12
531	Xtwitches	7793	36.1702	All	p12_191122_191204_191204_a000	191122_191204	P12
532	Xtwitches	9165	29.3651	All	p12_191122_191204_191204_a000	191122_191204	P12
533	Xtwitches	10498	29.6296	All	p12_191122_191204_191204_a000	191122_191204	P12
534	Xtwitches	10641	29.0598	All	p12_191122_191204_191204_a000	191122_191204	P12
535	Xtwitches	10765	43.5294	All	p12_191122_191204_191204_a000	191122_191204	P12
536	Xtwitches	10825	35.7798	All	p12_191122_191204_191204_a000	191122_191204	P12
537	Xtwitches	11390	38.2716	All	p12_191122_191204_191204_a000	191122_191204	P12
538	Xtwitches	11696	25	All	p12_191122_191204_191204_a000	191122_191204	P12
539	Xtwitches	11883	44	All	p12_191122_191204_191204_a000	191122_191204	P12
540	Xtwitches	12274	50.9804	All	p12_191122_191204_191204_a000	191122_191204	P12
541	Xtwitches	12426	47.2727	All	p12_191122_191204_191204_a000	191122_191204	P12
542	Xcomplexe_movements	449	44.898	All	p12_191122_191204_191204_a001	191122_191204	P12
543	Xcomplexe_movements	678	45.7447	All	p12_191122_191204_191204_a001	191122_191204	P12
544	Xcomplexe_movements	1312	45.5696	All	p12_191122_191204_191204_a001	191122_191204	P12
545	Xcomplexe_movements	1625	40.4255	All	p12_191122_191204_191204_a001	191122_191204	P12
546	Xcomplexe_movements	1719	45.679	All	p12_191122_191204_191204_a001	191122_191204	P12
547	Xcomplexe_movements	2444	44.4444	All	p12_191122_191204_191204_a001	191122_191204	P12
548	Xcomplexe_movements	3324	49.4505	All	p12_191122_191204_191204_a001	191122_191204	P12
549	Xcomplexe_movements	3391	21.4286	All	p12_191122_191204_191204_a001	191122_191204	P12
550	Xcomplexe_movements	3537	42.8571	All	p12_191122_191204_191204_a001	191122_191204	P12
551	Xcomplexe_movements	3664	39.726	All	p12_191122_191204_191204_a001	191122_191204	P12
552	Xcomplexe_movements	4557	57.1429	All	p12_191122_191204_191204_a001	191122_191204	P12
553	Xcomplexe_movements	4844	50	All	p12_191122_191204_191204_a001	191122_191204	P12
554	Xcomplexe_movements	5166	32.5301	All	p12_191122_191204_191204_a001	191122_191204	P12
555	Xcomplexe_movements	5685	61.3208	All	p12_191122_191204_191204_a001	191122_191204	P12
556	Xcomplexe_movements	5921	44.5652	All	p12_191122_191204_191204_a001	191122_191204	P12
557	Xcomplexe_movements	6743	31.1111	All	p12_191122_191204_191204_a001	191122_191204	P12
558	Xcomplexe_movements	6836	46.0317	All	p12_191122_191204_191204_a001	191122_191204	P12
559	Xcomplexe_movements	6900	41.5094	All	p12_191122_191204_191204_a001	191122_191204	P12
560	Xcomplexe_movements	7543	31.3253	All	p12_191122_191204_191204_a001	191122_191204	P12
561	Xcomplexe_movements	7670	39.3443	All	p12_191122_191204_191204_a001	191122_191204	P12
562	Xcomplexe_movements	8026	39.4231	All	p12_191122_191204_191204_a001	191122_191204	P12
563	Xcomplexe_movements	8072	70.4918	All	p12_191122_191204_191204_a001	191122_191204	P12
564	Xcomplexe_movements	8129	39.3258	All	p12_191122_191204_191204_a001	191122_191204	P12
565	Xcomplexe_movements	8533	34.4262	All	p12_191122_191204_191204_a001	191122_191204	P12
566	Xcomplexe_movements	8646	51.3889	All	p12_191122_191204_191204_a001	191122_191204	P12
567	Xcomplexe_movements	8714	57.6923	All	p12_191122_191204_191204_a001	191122_191204	P12
568	Xcomplexe_movements	8739	68	All	p12_191122_191204_191204_a001	191122_191204	P12
569	Xcomplexe_movements	8972	34.4828	All	p12_191122_191204_191204_a001	191122_191204	P12
570	Xcomplexe_movements	9283	42.6829	All	p12_191122_191204_191204_a001	191122_191204	P12
571	Xcomplexe_movements	9369	48.6486	All	p12_191122_191204_191204_a001	191122_191204	P12
572	Xcomplexe_movements	9409	43.038	All	p12_191122_191204_191204_a001	191122_191204	P12
573	Xcomplexe_movements	9666	35.6589	All	p12_191122_191204_191204_a001	191122_191204	P12
574	Xcomplexe_movements	11000	54.1176	All	p12_191122_191204_191204_a001	191122_191204	P12
575	Xcomplexe_movements	11432	41.0256	All	p12_191122_191204_191204_a001	191122_191204	P12
576	Xcomplexe_movements	11797	55.4054	All	p12_191122_191204_191204_a001	191122_191204	P12
577	Xrun_walk	3352	44.3038	All	p12_191122_191204_191204_a001	191122_191204	P12
578	Xrun_walk	8111	56.3107	All	p12_191122_191204_191204_a001	191122_191204	P12
579	Xrun_walk	8613	63.4146	All	p12_191122_191204_191204_a001	191122_191204	P12
580	Xrun_walk	8689	61.2245	All	p12_191122_191204_191204_a001	191122_191204	P12
581	Xrun_walk	8723	53.9474	All	p12_191122_191204_191204_a001	191122_191204	P12
582	Xrun_walk	9336	69.1358	All	p12_191122_191204_191204_a001	191122_191204	P12
583	Xrun_walk	9393	53.9326	All	p12_191122_191204_191204_a001	191122_191204	P12
584	Xstartles	1032	39.7849	All	p12_191122_191204_191204_a001	191122_191204	P12
585	Xstartles	1161	26.7857	All	p12_191122_191204_191204_a001	191122_191204	P12
586	Xstartles	1943	29.3578	All	p12_191122_191204_191204_a001	191122_191204	P12
587	Xstartles	2013	38.843	All	p12_191122_191204_191204_a001	191122_191204	P12
588	Xstartles	3316	50	All	p12_191122_191204_191204_a001	191122_191204	P12
589	Xstartles	3892	43.3333	All	p12_191122_191204_191204_a001	191122_191204	P12
590	Xstartles	4258	28.0992	All	p12_191122_191204_191204_a001	191122_191204	P12
591	Xstartles	5350	32.6087	All	p12_191122_191204_191204_a001	191122_191204	P12
592	Xstartles	5403	27.1739	All	p12_191122_191204_191204_a001	191122_191204	P12
593	Xstartles	5456	36.1111	All	p12_191122_191204_191204_a001	191122_191204	P12
594	Xstartles	5583	44.4444	All	p12_191122_191204_191204_a001	191122_191204	P12
595	Xstartles	6138	57.3913	All	p12_191122_191204_191204_a001	191122_191204	P12
596	Xstartles	6338	36.2745	All	p12_191122_191204_191204_a001	191122_191204	P12
597	Xstartles	6381	43.5484	All	p12_191122_191204_191204_a001	191122_191204	P12
598	Xstartles	6463	56.5217	All	p12_191122_191204_191204_a001	191122_191204	P12
599	Xstartles	6637	42.029	All	p12_191122_191204_191204_a001	191122_191204	P12
600	Xstartles	6677	40.2062	All	p12_191122_191204_191204_a001	191122_191204	P12
601	Xstartles	7434	30.4348	All	p12_191122_191204_191204_a001	191122_191204	P12
602	Xstartles	7962	30.1205	All	p12_191122_191204_191204_a001	191122_191204	P12
603	Xstartles	12376	35.1351	All	p12_191122_191204_191204_a001	191122_191204	P12
604	Xtwitches	100	28.5714	All	p12_191122_191204_191204_a001	191122_191204	P12
605	Xtwitches	149	39	All	p12_191122_191204_191204_a001	191122_191204	P12
606	Xtwitches	249	43.8202	All	p12_191122_191204_191204_a001	191122_191204	P12
607	Xtwitches	390	31.3253	All	p12_191122_191204_191204_a001	191122_191204	P12
608	Xtwitches	620	44.3299	All	p12_191122_191204_191204_a001	191122_191204	P12
609	Xtwitches	673	53.0612	All	p12_191122_191204_191204_a001	191122_191204	P12
610	Xtwitches	982	43.75	All	p12_191122_191204_191204_a001	191122_191204	P12
611	Xtwitches	2093	40	All	p12_191122_191204_191204_a001	191122_191204	P12
612	Xtwitches	2121	58.9286	All	p12_191122_191204_191204_a001	191122_191204	P12
613	Xtwitches	2167	38.6667	All	p12_191122_191204_191204_a001	191122_191204	P12
614	Xtwitches	2218	37.5	All	p12_191122_191204_191204_a001	191122_191204	P12
615	Xtwitches	2296	32.6087	All	p12_191122_191204_191204_a001	191122_191204	P12
616	Xtwitches	2346	45.8333	All	p12_191122_191204_191204_a001	191122_191204	P12
617	Xtwitches	2396	42.3913	All	p12_191122_191204_191204_a001	191122_191204	P12
618	Xtwitches	2784	23.5294	All	p12_191122_191204_191204_a001	191122_191204	P12
619	Xtwitches	3818	45.8333	All	p12_191122_191204_191204_a001	191122_191204	P12
620	Xtwitches	4379	32.7103	All	p12_191122_191204_191204_a001	191122_191204	P12
621	Xtwitches	5271	61.6667	All	p12_191122_191204_191204_a001	191122_191204	P12
622	Xtwitches	5993	32.0388	All	p12_191122_191204_191204_a001	191122_191204	P12
623	Xtwitches	6051	58.427	All	p12_191122_191204_191204_a001	191122_191204	P12
624	Xtwitches	6098	41.8605	All	p12_191122_191204_191204_a001	191122_191204	P12
625	Xtwitches	6205	37.1795	All	p12_191122_191204_191204_a001	191122_191204	P12
626	Xtwitches	6246	37.2093	All	p12_191122_191204_191204_a001	191122_191204	P12
627	Xtwitches	6558	20.8696	All	p12_191122_191204_191204_a001	191122_191204	P12
628	Xtwitches	7137	34.8684	All	p12_191122_191204_191204_a001	191122_191204	P12
629	Xtwitches	7299	28.866	All	p12_191122_191204_191204_a001	191122_191204	P12
630	Xtwitches	7384	47.2222	All	p12_191122_191204_191204_a001	191122_191204	P12
631	Xtwitches	7778	30.6931	All	p12_191122_191204_191204_a001	191122_191204	P12
632	Xtwitches	8392	34.1463	All	p12_191122_191204_191204_a001	191122_191204	P12
633	long_movement	96	75	All	p5_190320_190325_190325_a000	190320_190325	P5
634	long_movement	1849	78.5714	All	p5_190320_190325_190325_a000	190320_190325	P5
635	long_movement	2088	58.75	All	p5_190320_190325_190325_a000	190320_190325	P5
636	long_movement	4487	81.8182	All	p5_190320_190325_190325_a000	190320_190325	P5
637	long_movement	4576	90	All	p5_190320_190325_190325_a000	190320_190325	P5
638	long_movement	5055	76.1905	All	p5_190320_190325_190325_a000	190320_190325	P5
639	long_movement	5544	75.6757	All	p5_190320_190325_190325_a000	190320_190325	P5
640	long_movement	5663	87.0968	All	p5_190320_190325_190325_a000	190320_190325	P5
641	long_movement	6233	92	All	p5_190320_190325_190325_a000	190320_190325	P5
642	long_movement	7026	83.0769	All	p5_190320_190325_190325_a000	190320_190325	P5
643	long_movement	9199	91.3043	All	p5_190320_190325_190325_a000	190320_190325	P5
644	long_movement	11713	90	All	p5_190320_190325_190325_a000	190320_190325	P5
645	long_movement	11955	72.7273	All	p5_190320_190325_190325_a000	190320_190325	P5
646	long_movement	12406	75	All	p5_190320_190325_190325_a000	190320_190325	P5
647	twitches	265	54.5455	All	p5_190320_190325_190325_a000	190320_190325	P5
648	twitches	329	87.5	All	p5_190320_190325_190325_a000	190320_190325	P5
649	twitches	473	64	All	p5_190320_190325_190325_a000	190320_190325	P5
650	twitches	882	71.0526	All	p5_190320_190325_190325_a000	190320_190325	P5
651	twitches	943	76.4706	All	p5_190320_190325_190325_a000	190320_190325	P5
652	twitches	1284	48.1481	All	p5_190320_190325_190325_a000	190320_190325	P5
653	twitches	1310	63.1579	All	p5_190320_190325_190325_a000	190320_190325	P5
654	twitches	1514	69.2308	All	p5_190320_190325_190325_a000	190320_190325	P5
655	twitches	1591	77.7778	All	p5_190320_190325_190325_a000	190320_190325	P5
656	twitches	2551	92.8571	All	p5_190320_190325_190325_a000	190320_190325	P5
657	twitches	2741	88	All	p5_190320_190325_190325_a000	190320_190325	P5
658	twitches	2819	70.8333	All	p5_190320_190325_190325_a000	190320_190325	P5
659	twitches	2838	56.0976	All	p5_190320_190325_190325_a000	190320_190325	P5
660	twitches	2991	52	All	p5_190320_190325_190325_a000	190320_190325	P5
661	twitches	3464	50.7042	All	p5_190320_190325_190325_a000	190320_190325	P5
662	twitches	3531	91.6667	All	p5_190320_190325_190325_a000	190320_190325	P5
663	twitches	3750	80.9524	All	p5_190320_190325_190325_a000	190320_190325	P5
664	twitches	3926	95.8333	All	p5_190320_190325_190325_a000	190320_190325	P5
665	twitches	4000	95	All	p5_190320_190325_190325_a000	190320_190325	P5
666	twitches	4345	80.9524	All	p5_190320_190325_190325_a000	190320_190325	P5
667	twitches	4669	64.2857	All	p5_190320_190325_190325_a000	190320_190325	P5
668	twitches	4714	92.5926	All	p5_190320_190325_190325_a000	190320_190325	P5
669	twitches	4819	76.9231	All	p5_190320_190325_190325_a000	190320_190325	P5
670	twitches	4882	94.7368	All	p5_190320_190325_190325_a000	190320_190325	P5
671	twitches	4965	61.4035	All	p5_190320_190325_190325_a000	190320_190325	P5
672	twitches	5205	83.3333	All	p5_190320_190325_190325_a000	190320_190325	P5
673	twitches	5294	70	All	p5_190320_190325_190325_a000	190320_190325	P5
674	twitches	5768	85.7143	All	p5_190320_190325_190325_a000	190320_190325	P5
675	twitches	5854	85.7143	All	p5_190320_190325_190325_a000	190320_190325	P5
676	twitches	5917	84.2105	All	p5_190320_190325_190325_a000	190320_190325	P5
677	twitches	6366	74.4186	All	p5_190320_190325_190325_a000	190320_190325	P5
678	twitches	7222	84	All	p5_190320_190325_190325_a000	190320_190325	P5
679	twitches	7292	100	All	p5_190320_190325_190325_a000	190320_190325	P5
680	twitches	7634	93.75	All	p5_190320_190325_190325_a000	190320_190325	P5
681	twitches	8001	82.6087	All	p5_190320_190325_190325_a000	190320_190325	P5
682	twitches	8170	63.6364	All	p5_190320_190325_190325_a000	190320_190325	P5
683	twitches	8342	80	All	p5_190320_190325_190325_a000	190320_190325	P5
684	twitches	8578	81.25	All	p5_190320_190325_190325_a000	190320_190325	P5
685	twitches	8669	73.3333	All	p5_190320_190325_190325_a000	190320_190325	P5
686	twitches	8740	76	All	p5_190320_190325_190325_a000	190320_190325	P5
687	twitches	8802	96	All	p5_190320_190325_190325_a000	190320_190325	P5
688	twitches	9425	86.3636	All	p5_190320_190325_190325_a000	190320_190325	P5
689	twitches	9579	71.875	All	p5_190320_190325_190325_a000	190320_190325	P5
690	twitches	9648	88	All	p5_190320_190325_190325_a000	190320_190325	P5
691	twitches	9801	56.25	All	p5_190320_190325_190325_a000	190320_190325	P5
692	twitches	9855	69.6429	All	p5_190320_190325_190325_a000	190320_190325	P5
693	twitches	10060	77.2727	All	p5_190320_190325_190325_a000	190320_190325	P5
694	twitches	10117	100	All	p5_190320_190325_190325_a000	190320_190325	P5
695	twitches	10169	93.3333	All	p5_190320_190325_190325_a000	190320_190325	P5
696	twitches	10249	72.4138	All	p5_190320_190325_190325_a000	190320_190325	P5
697	twitches	10410	80.9524	All	p5_190320_190325_190325_a000	190320_190325	P5
698	twitches	10465	83.3333	All	p5_190320_190325_190325_a000	190320_190325	P5
699	twitches	10543	80	All	p5_190320_190325_190325_a000	190320_190325	P5
700	twitches	10870	72.2222	All	p5_190320_190325_190325_a000	190320_190325	P5
701	twitches	11062	73.3333	All	p5_190320_190325_190325_a000	190320_190325	P5
702	twitches	11446	81.25	All	p5_190320_190325_190325_a000	190320_190325	P5
703	twitches	11552	90.4762	All	p5_190320_190325_190325_a000	190320_190325	P5
704	twitches	12135	88.5714	All	p5_190320_190325_190325_a000	190320_190325	P5
705	twitches	12354	56.7568	All	p5_190320_190325_190325_a000	190320_190325	P5
706	unclassified_movement	193	51.4286	All	p5_190320_190325_190325_a000	190320_190325	P5
707	unclassified_movement	403	70.8333	All	p5_190320_190325_190325_a000	190320_190325	P5
708	unclassified_movement	572	67.8571	All	p5_190320_190325_190325_a000	190320_190325	P5
709	unclassified_movement	644	86.6667	All	p5_190320_190325_190325_a000	190320_190325	P5
710	unclassified_movement	762	93.3333	All	p5_190320_190325_190325_a000	190320_190325	P5
711	unclassified_movement	1371	68.75	All	p5_190320_190325_190325_a000	190320_190325	P5
712	unclassified_movement	1760	66.6667	All	p5_190320_190325_190325_a000	190320_190325	P5
713	unclassified_movement	1983	57.6923	All	p5_190320_190325_190325_a000	190320_190325	P5
714	unclassified_movement	2189	90.9091	All	p5_190320_190325_190325_a000	190320_190325	P5
715	unclassified_movement	2244	100	All	p5_190320_190325_190325_a000	190320_190325	P5
716	unclassified_movement	2291	73.3333	All	p5_190320_190325_190325_a000	190320_190325	P5
717	unclassified_movement	2362	71.4286	All	p5_190320_190325_190325_a000	190320_190325	P5
718	unclassified_movement	2631	61.5385	All	p5_190320_190325_190325_a000	190320_190325	P5
719	unclassified_movement	2895	78.0488	All	p5_190320_190325_190325_a000	190320_190325	P5
720	unclassified_movement	3086	89.7959	All	p5_190320_190325_190325_a000	190320_190325	P5
721	unclassified_movement	3261	63.7681	All	p5_190320_190325_190325_a000	190320_190325	P5
722	unclassified_movement	3618	85.7143	All	p5_190320_190325_190325_a000	190320_190325	P5
723	unclassified_movement	3818	75	All	p5_190320_190325_190325_a000	190320_190325	P5
724	unclassified_movement	4268	94.4444	All	p5_190320_190325_190325_a000	190320_190325	P5
725	unclassified_movement	5137	83.3333	All	p5_190320_190325_190325_a000	190320_190325	P5
726	unclassified_movement	5431	38.4615	All	p5_190320_190325_190325_a000	190320_190325	P5
727	unclassified_movement	5500	62.5	All	p5_190320_190325_190325_a000	190320_190325	P5
728	unclassified_movement	5968	70.2703	All	p5_190320_190325_190325_a000	190320_190325	P5
729	unclassified_movement	6118	100	All	p5_190320_190325_190325_a000	190320_190325	P5
730	unclassified_movement	6448	83.3333	All	p5_190320_190325_190325_a000	190320_190325	P5
731	unclassified_movement	6528	82.1429	All	p5_190320_190325_190325_a000	190320_190325	P5
732	unclassified_movement	7424	77.5	All	p5_190320_190325_190325_a000	190320_190325	P5
733	unclassified_movement	7564	87.5	All	p5_190320_190325_190325_a000	190320_190325	P5
734	unclassified_movement	7719	73.0769	All	p5_190320_190325_190325_a000	190320_190325	P5
735	unclassified_movement	7836	50	All	p5_190320_190325_190325_a000	190320_190325	P5
736	unclassified_movement	8087	95	All	p5_190320_190325_190325_a000	190320_190325	P5
737	unclassified_movement	8365	51.4706	All	p5_190320_190325_190325_a000	190320_190325	P5
738	unclassified_movement	8878	94.1176	All	p5_190320_190325_190325_a000	190320_190325	P5
739	unclassified_movement	9342	64.8148	All	p5_190320_190325_190325_a000	190320_190325	P5
740	unclassified_movement	9488	92.3077	All	p5_190320_190325_190325_a000	190320_190325	P5
741	unclassified_movement	10341	66.6667	All	p5_190320_190325_190325_a000	190320_190325	P5
742	unclassified_movement	10652	75.5556	All	p5_190320_190325_190325_a000	190320_190325	P5
743	unclassified_movement	10768	54.8387	All	p5_190320_190325_190325_a000	190320_190325	P5
744	unclassified_movement	10988	75.3425	All	p5_190320_190325_190325_a000	190320_190325	P5
745	unclassified_movement	11192	74.359	All	p5_190320_190325_190325_a000	190320_190325	P5
746	unclassified_movement	11358	68.5185	All	p5_190320_190325_190325_a000	190320_190325	P5
747	unclassified_movement	11625	85.7143	All	p5_190320_190325_190325_a000	190320_190325	P5
748	long_movement	49	83.3333	All	p5_190320_190325_190325_a001	190320_190325	P5
749	long_movement	2250	78.5714	All	p5_190320_190325_190325_a001	190320_190325	P5
750	long_movement	2263	76.3158	All	p5_190320_190325_190325_a001	190320_190325	P5
751	long_movement	2356	75	All	p5_190320_190325_190325_a001	190320_190325	P5
752	long_movement	2425	91.6667	All	p5_190320_190325_190325_a001	190320_190325	P5
753	long_movement	2558	94.7368	All	p5_190320_190325_190325_a001	190320_190325	P5
754	long_movement	3201	76.9231	All	p5_190320_190325_190325_a001	190320_190325	P5
755	long_movement	3508	96.7742	All	p5_190320_190325_190325_a001	190320_190325	P5
756	long_movement	3588	96.6667	All	p5_190320_190325_190325_a001	190320_190325	P5
757	long_movement	3870	96.1538	All	p5_190320_190325_190325_a001	190320_190325	P5
758	long_movement	4608	100	All	p5_190320_190325_190325_a001	190320_190325	P5
759	long_movement	4776	91.6667	All	p5_190320_190325_190325_a001	190320_190325	P5
760	long_movement	4881	100	All	p5_190320_190325_190325_a001	190320_190325	P5
761	long_movement	5660	63.0435	All	p5_190320_190325_190325_a001	190320_190325	P5
762	long_movement	5725	85.7143	All	p5_190320_190325_190325_a001	190320_190325	P5
763	long_movement	5988	65.8537	All	p5_190320_190325_190325_a001	190320_190325	P5
764	long_movement	6081	100	All	p5_190320_190325_190325_a001	190320_190325	P5
765	long_movement	6309	100	All	p5_190320_190325_190325_a001	190320_190325	P5
766	long_movement	6539	78.5714	All	p5_190320_190325_190325_a001	190320_190325	P5
767	long_movement	7170	96	All	p5_190320_190325_190325_a001	190320_190325	P5
768	long_movement	7342	83.7838	All	p5_190320_190325_190325_a001	190320_190325	P5
769	long_movement	7462	100	All	p5_190320_190325_190325_a001	190320_190325	P5
770	long_movement	7569	94.5946	All	p5_190320_190325_190325_a001	190320_190325	P5
771	long_movement	8183	85.1852	All	p5_190320_190325_190325_a001	190320_190325	P5
772	long_movement	8708	78.5047	All	p5_190320_190325_190325_a001	190320_190325	P5
773	long_movement	8788	91.3043	All	p5_190320_190325_190325_a001	190320_190325	P5
774	long_movement	9214	88.3721	All	p5_190320_190325_190325_a001	190320_190325	P5
775	long_movement	9531	96.5517	All	p5_190320_190325_190325_a001	190320_190325	P5
776	long_movement	9749	88.8889	All	p5_190320_190325_190325_a001	190320_190325	P5
777	long_movement	9974	89.1892	All	p5_190320_190325_190325_a001	190320_190325	P5
778	long_movement	10172	14.2857	All	p5_190320_190325_190325_a001	190320_190325	P5
779	long_movement	10918	73.0769	All	p5_190320_190325_190325_a001	190320_190325	P5
780	long_movement	10996	76.7857	All	p5_190320_190325_190325_a001	190320_190325	P5
781	long_movement	11305	88.4615	All	p5_190320_190325_190325_a001	190320_190325	P5
782	twitches	686	85.7143	All	p5_190320_190325_190325_a001	190320_190325	P5
783	twitches	772	94.4444	All	p5_190320_190325_190325_a001	190320_190325	P5
784	twitches	885	100	All	p5_190320_190325_190325_a001	190320_190325	P5
785	twitches	1004	100	All	p5_190320_190325_190325_a001	190320_190325	P5
786	twitches	1150	88.8889	All	p5_190320_190325_190325_a001	190320_190325	P5
787	twitches	1265	96.2963	All	p5_190320_190325_190325_a001	190320_190325	P5
788	twitches	1343	100	All	p5_190320_190325_190325_a001	190320_190325	P5
789	twitches	1419	61.1111	All	p5_190320_190325_190325_a001	190320_190325	P5
790	twitches	1433	50	All	p5_190320_190325_190325_a001	190320_190325	P5
791	twitches	1539	100	All	p5_190320_190325_190325_a001	190320_190325	P5
792	twitches	1593	62.5	All	p5_190320_190325_190325_a001	190320_190325	P5
793	twitches	1644	87.5	All	p5_190320_190325_190325_a001	190320_190325	P5
794	twitches	1729	90	All	p5_190320_190325_190325_a001	190320_190325	P5
795	twitches	1817	83.3333	All	p5_190320_190325_190325_a001	190320_190325	P5
796	twitches	1900	100	All	p5_190320_190325_190325_a001	190320_190325	P5
797	twitches	1996	92.8571	All	p5_190320_190325_190325_a001	190320_190325	P5
798	twitches	2049	83.3333	All	p5_190320_190325_190325_a001	190320_190325	P5
799	twitches	2141	91.6667	All	p5_190320_190325_190325_a001	190320_190325	P5
800	twitches	2235	83.3333	All	p5_190320_190325_190325_a001	190320_190325	P5
801	twitches	2740	95.6522	All	p5_190320_190325_190325_a001	190320_190325	P5
802	twitches	2803	100	All	p5_190320_190325_190325_a001	190320_190325	P5
803	twitches	2862	91.6667	All	p5_190320_190325_190325_a001	190320_190325	P5
804	twitches	2941	100	All	p5_190320_190325_190325_a001	190320_190325	P5
805	twitches	3058	94.4444	All	p5_190320_190325_190325_a001	190320_190325	P5
806	twitches	3092	57.1429	All	p5_190320_190325_190325_a001	190320_190325	P5
807	twitches	3122	35.2941	All	p5_190320_190325_190325_a001	190320_190325	P5
808	twitches	3314	93.75	All	p5_190320_190325_190325_a001	190320_190325	P5
809	twitches	3391	100	All	p5_190320_190325_190325_a001	190320_190325	P5
810	twitches	3731	80	All	p5_190320_190325_190325_a001	190320_190325	P5
811	twitches	3798	100	All	p5_190320_190325_190325_a001	190320_190325	P5
812	twitches	3963	83.3333	All	p5_190320_190325_190325_a001	190320_190325	P5
813	twitches	4157	42.3077	All	p5_190320_190325_190325_a001	190320_190325	P5
814	twitches	4240	100	All	p5_190320_190325_190325_a001	190320_190325	P5
815	twitches	4355	88.8889	All	p5_190320_190325_190325_a001	190320_190325	P5
816	twitches	4483	88.2353	All	p5_190320_190325_190325_a001	190320_190325	P5
817	twitches	4487	89.1892	All	p5_190320_190325_190325_a001	190320_190325	P5
818	twitches	4517	34.6154	All	p5_190320_190325_190325_a001	190320_190325	P5
819	twitches	4960	89.4737	All	p5_190320_190325_190325_a001	190320_190325	P5
820	twitches	5048	87.5	All	p5_190320_190325_190325_a001	190320_190325	P5
821	twitches	5126	81.8182	All	p5_190320_190325_190325_a001	190320_190325	P5
822	twitches	5195	100	All	p5_190320_190325_190325_a001	190320_190325	P5
823	twitches	5376	100	All	p5_190320_190325_190325_a001	190320_190325	P5
824	twitches	5474	94.7368	All	p5_190320_190325_190325_a001	190320_190325	P5
825	twitches	5617	98.1132	All	p5_190320_190325_190325_a001	190320_190325	P5
826	twitches	6430	83.3333	All	p5_190320_190325_190325_a001	190320_190325	P5
827	twitches	6659	100	All	p5_190320_190325_190325_a001	190320_190325	P5
828	twitches	6741	86.6667	All	p5_190320_190325_190325_a001	190320_190325	P5
829	twitches	6819	79.1667	All	p5_190320_190325_190325_a001	190320_190325	P5
830	twitches	6895	100	All	p5_190320_190325_190325_a001	190320_190325	P5
831	twitches	6998	100	All	p5_190320_190325_190325_a001	190320_190325	P5
832	twitches	7102	88.8889	All	p5_190320_190325_190325_a001	190320_190325	P5
833	twitches	7279	57.1429	All	p5_190320_190325_190325_a001	190320_190325	P5
834	twitches	7674	100	All	p5_190320_190325_190325_a001	190320_190325	P5
835	twitches	8027	83.3333	All	p5_190320_190325_190325_a001	190320_190325	P5
836	twitches	8127	100	All	p5_190320_190325_190325_a001	190320_190325	P5
837	twitches	8498	66.6667	All	p5_190320_190325_190325_a001	190320_190325	P5
838	twitches	8563	91.6667	All	p5_190320_190325_190325_a001	190320_190325	P5
839	twitches	8670	100	All	p5_190320_190325_190325_a001	190320_190325	P5
840	twitches	9881	66.6667	All	p5_190320_190325_190325_a001	190320_190325	P5
841	twitches	10147	55.4795	All	p5_190320_190325_190325_a001	190320_190325	P5
842	twitches	10446	84.2105	All	p5_190320_190325_190325_a001	190320_190325	P5
843	twitches	10578	88.2353	All	p5_190320_190325_190325_a001	190320_190325	P5
844	twitches	10670	83.3333	All	p5_190320_190325_190325_a001	190320_190325	P5
845	twitches	11318	58.5366	All	p5_190320_190325_190325_a001	190320_190325	P5
846	twitches	11418	100	All	p5_190320_190325_190325_a001	190320_190325	P5
847	twitches	11495	69.5652	All	p5_190320_190325_190325_a001	190320_190325	P5
848	twitches	11575	96.6667	All	p5_190320_190325_190325_a001	190320_190325	P5
849	twitches	11642	85.7143	All	p5_190320_190325_190325_a001	190320_190325	P5
850	twitches	11715	64.2857	All	p5_190320_190325_190325_a001	190320_190325	P5
851	twitches	11901	79.1667	All	p5_190320_190325_190325_a001	190320_190325	P5
852	twitches	11974	90	All	p5_190320_190325_190325_a001	190320_190325	P5
853	twitches	12047	95.4545	All	p5_190320_190325_190325_a001	190320_190325	P5
854	twitches	12084	94.1176	All	p5_190320_190325_190325_a001	190320_190325	P5
855	twitches	12270	95.2381	All	p5_190320_190325_190325_a001	190320_190325	P5
856	twitches	12355	92.5926	All	p5_190320_190325_190325_a001	190320_190325	P5
857	twitches	12400	80	All	p5_190320_190325_190325_a001	190320_190325	P5
858	twitches	12471	100	All	p5_190320_190325_190325_a001	190320_190325	P5
859	unclassified_movement	559	73.6842	All	p5_190320_190325_190325_a001	190320_190325	P5
860	unclassified_movement	1961	0	All	p5_190320_190325_190325_a001	190320_190325	P5
861	unclassified_movement	4498	57.1429	All	p5_190320_190325_190325_a001	190320_190325	P5
862	unclassified_movement	5291	88.2353	All	p5_190320_190325_190325_a001	190320_190325	P5
863	unclassified_movement	5602	94.4444	All	p5_190320_190325_190325_a001	190320_190325	P5
864	unclassified_movement	5950	89.6552	All	p5_190320_190325_190325_a001	190320_190325	P5
865	unclassified_movement	5964	50	All	p5_190320_190325_190325_a001	190320_190325	P5
866	unclassified_movement	7788	90	All	p5_190320_190325_190325_a001	190320_190325	P5
867	unclassified_movement	7912	94.4444	All	p5_190320_190325_190325_a001	190320_190325	P5
868	unclassified_movement	8328	100	All	p5_190320_190325_190325_a001	190320_190325	P5
869	unclassified_movement	9095	83.7838	All	p5_190320_190325_190325_a001	190320_190325	P5
870	unclassified_movement	11846	100	All	p5_190320_190325_190325_a001	190320_190325	P5
871	unclassified_movement	12195	71.0526	All	p5_190320_190325_190325_a001	190320_190325	P5
872	Xcomplexe_movements	5358	86.25	All	p5_191205_191210_0_191210_a000	191205_191210_0	P5
873	Xcomplexe_movements	7821	57.6271	All	p5_191205_191210_0_191210_a000	191205_191210_0	P5
874	Xcomplexe_movements	7866	56.8966	All	p5_191205_191210_0_191210_a000	191205_191210_0	P5
875	Xcomplexe_movements	8039	89.5349	All	p5_191205_191210_0_191210_a000	191205_191210_0	P5
876	Xcomplexe_movements	8158	82.6087	All	p5_191205_191210_0_191210_a000	191205_191210_0	P5
877	Xcomplexe_movements	8327	95.3846	All	p5_191205_191210_0_191210_a000	191205_191210_0	P5
878	Xcomplexe_movements	8476	58.209	All	p5_191205_191210_0_191210_a000	191205_191210_0	P5
879	Xcomplexe_movements	8648	82.8947	All	p5_191205_191210_0_191210_a000	191205_191210_0	P5
880	Xcomplexe_movements	8931	63.0631	All	p5_191205_191210_0_191210_a000	191205_191210_0	P5
881	Xcomplexe_movements	9126	84.2857	All	p5_191205_191210_0_191210_a000	191205_191210_0	P5
882	Xcomplexe_movements	11097	95.9459	All	p5_191205_191210_0_191210_a000	191205_191210_0	P5
883	Xcomplexe_movements	11172	84	All	p5_191205_191210_0_191210_a000	191205_191210_0	P5
884	Xcomplexe_movements	11512	94.1176	All	p5_191205_191210_0_191210_a000	191205_191210_0	P5
885	Xcomplexe_movements	11599	86.8421	All	p5_191205_191210_0_191210_a000	191205_191210_0	P5
886	Xcomplexe_movements	11650	56.8966	All	p5_191205_191210_0_191210_a000	191205_191210_0	P5
887	Xcomplexe_movements	11753	77.7778	All	p5_191205_191210_0_191210_a000	191205_191210_0	P5
888	Xcomplexe_movements	11896	42.5197	All	p5_191205_191210_0_191210_a000	191205_191210_0	P5
889	Xcomplexe_movements	11951	92.4528	All	p5_191205_191210_0_191210_a000	191205_191210_0	P5
890	Xcomplexe_movements	12099	67.5	All	p5_191205_191210_0_191210_a000	191205_191210_0	P5
891	Xcomplexe_movements	12202	70.5882	All	p5_191205_191210_0_191210_a000	191205_191210_0	P5
892	Xcomplexe_movements	12217	57.3171	All	p5_191205_191210_0_191210_a000	191205_191210_0	P5
893	Xcomplexe_movements	12258	73.6842	All	p5_191205_191210_0_191210_a000	191205_191210_0	P5
894	Xcomplexe_movements	12327	64.7059	All	p5_191205_191210_0_191210_a000	191205_191210_0	P5
895	Xcomplexe_movements	12441	79.0323	All	p5_191205_191210_0_191210_a000	191205_191210_0	P5
896	Xstartles	7137	80.3571	All	p5_191205_191210_0_191210_a000	191205_191210_0	P5
897	Xstartles	7564	66.0377	All	p5_191205_191210_0_191210_a000	191205_191210_0	P5
898	Xstartles	9351	91.4894	All	p5_191205_191210_0_191210_a000	191205_191210_0	P5
899	Xstartles	9423	87.3786	All	p5_191205_191210_0_191210_a000	191205_191210_0	P5
900	Xstartles	10072	59.1716	All	p5_191205_191210_0_191210_a000	191205_191210_0	P5
901	Xstartles	10084	27.9503	All	p5_191205_191210_0_191210_a000	191205_191210_0	P5
902	Xstartles	10281	92.7273	All	p5_191205_191210_0_191210_a000	191205_191210_0	P5
903	Xstartles	10554	94.3396	All	p5_191205_191210_0_191210_a000	191205_191210_0	P5
904	Xstartles	10603	96.9697	All	p5_191205_191210_0_191210_a000	191205_191210_0	P5
905	Xstartles	10669	87.9518	All	p5_191205_191210_0_191210_a000	191205_191210_0	P5
906	Xstartles	10995	81.8182	All	p5_191205_191210_0_191210_a000	191205_191210_0	P5
907	Xtwitches	345	69.6078	All	p5_191205_191210_0_191210_a000	191205_191210_0	P5
908	Xtwitches	739	91.3793	All	p5_191205_191210_0_191210_a000	191205_191210_0	P5
909	Xtwitches	1180	97.6744	All	p5_191205_191210_0_191210_a000	191205_191210_0	P5
910	Xtwitches	1540	69.8113	All	p5_191205_191210_0_191210_a000	191205_191210_0	P5
911	Xtwitches	1544	57.5758	All	p5_191205_191210_0_191210_a000	191205_191210_0	P5
912	Xtwitches	2184	80.5825	All	p5_191205_191210_0_191210_a000	191205_191210_0	P5
913	Xtwitches	2187	57.9439	All	p5_191205_191210_0_191210_a000	191205_191210_0	P5
914	Xtwitches	2193	41.0714	All	p5_191205_191210_0_191210_a000	191205_191210_0	P5
915	Xtwitches	2230	75.4717	All	p5_191205_191210_0_191210_a000	191205_191210_0	P5
916	Xtwitches	2372	90.1408	All	p5_191205_191210_0_191210_a000	191205_191210_0	P5
917	Xtwitches	2552	83.3333	All	p5_191205_191210_0_191210_a000	191205_191210_0	P5
918	Xtwitches	2700	33.3333	All	p5_191205_191210_0_191210_a000	191205_191210_0	P5
919	Xtwitches	2779	84.6154	All	p5_191205_191210_0_191210_a000	191205_191210_0	P5
920	Xtwitches	2857	47.541	All	p5_191205_191210_0_191210_a000	191205_191210_0	P5
921	Xtwitches	2950	40	All	p5_191205_191210_0_191210_a000	191205_191210_0	P5
922	Xtwitches	2953	40	All	p5_191205_191210_0_191210_a000	191205_191210_0	P5
923	Xtwitches	2969	70.3704	All	p5_191205_191210_0_191210_a000	191205_191210_0	P5
924	Xtwitches	3358	55.2632	All	p5_191205_191210_0_191210_a000	191205_191210_0	P5
925	Xtwitches	3493	42.8571	All	p5_191205_191210_0_191210_a000	191205_191210_0	P5
926	Xtwitches	3607	25	All	p5_191205_191210_0_191210_a000	191205_191210_0	P5
927	Xtwitches	3727	48.9362	All	p5_191205_191210_0_191210_a000	191205_191210_0	P5
928	Xtwitches	3880	71.831	All	p5_191205_191210_0_191210_a000	191205_191210_0	P5
929	Xtwitches	4002	30	All	p5_191205_191210_0_191210_a000	191205_191210_0	P5
930	Xtwitches	4147	23.5294	All	p5_191205_191210_0_191210_a000	191205_191210_0	P5
931	Xtwitches	4172	54.5455	All	p5_191205_191210_0_191210_a000	191205_191210_0	P5
932	Xtwitches	4269	77.7778	All	p5_191205_191210_0_191210_a000	191205_191210_0	P5
933	Xtwitches	4464	39.2857	All	p5_191205_191210_0_191210_a000	191205_191210_0	P5
934	Xtwitches	4613	81.8182	All	p5_191205_191210_0_191210_a000	191205_191210_0	P5
935	Xtwitches	4722	45.9459	All	p5_191205_191210_0_191210_a000	191205_191210_0	P5
936	Xtwitches	4882	50	All	p5_191205_191210_0_191210_a000	191205_191210_0	P5
937	Xtwitches	4934	74.2268	All	p5_191205_191210_0_191210_a000	191205_191210_0	P5
938	Xtwitches	5043	61.194	All	p5_191205_191210_0_191210_a000	191205_191210_0	P5
939	Xtwitches	5185	55.4545	All	p5_191205_191210_0_191210_a000	191205_191210_0	P5
940	Xtwitches	5226	74.1935	All	p5_191205_191210_0_191210_a000	191205_191210_0	P5
941	Xtwitches	5452	92.7711	All	p5_191205_191210_0_191210_a000	191205_191210_0	P5
942	Xtwitches	5618	83.0769	All	p5_191205_191210_0_191210_a000	191205_191210_0	P5
943	Xtwitches	5757	66.4122	All	p5_191205_191210_0_191210_a000	191205_191210_0	P5
944	Xtwitches	5849	85.2459	All	p5_191205_191210_0_191210_a000	191205_191210_0	P5
945	Xtwitches	5964	93.1507	All	p5_191205_191210_0_191210_a000	191205_191210_0	P5
946	Xtwitches	6037	86.4198	All	p5_191205_191210_0_191210_a000	191205_191210_0	P5
947	Xtwitches	6161	83.5443	All	p5_191205_191210_0_191210_a000	191205_191210_0	P5
948	Xtwitches	6288	76.0331	All	p5_191205_191210_0_191210_a000	191205_191210_0	P5
949	Xtwitches	6503	77.3585	All	p5_191205_191210_0_191210_a000	191205_191210_0	P5
950	Xtwitches	6605	92.1569	All	p5_191205_191210_0_191210_a000	191205_191210_0	P5
951	Xtwitches	6704	82.8125	All	p5_191205_191210_0_191210_a000	191205_191210_0	P5
952	Xtwitches	6726	46.0526	All	p5_191205_191210_0_191210_a000	191205_191210_0	P5
953	Xtwitches	6733	61.1111	All	p5_191205_191210_0_191210_a000	191205_191210_0	P5
954	Xtwitches	6892	80	All	p5_191205_191210_0_191210_a000	191205_191210_0	P5
955	Xtwitches	6983	88.1356	All	p5_191205_191210_0_191210_a000	191205_191210_0	P5
956	Xtwitches	7052	77.3585	All	p5_191205_191210_0_191210_a000	191205_191210_0	P5
957	Xtwitches	7369	74.1379	All	p5_191205_191210_0_191210_a000	191205_191210_0	P5
958	Xtwitches	7478	87.3239	All	p5_191205_191210_0_191210_a000	191205_191210_0	P5
959	Xtwitches	7683	91.954	All	p5_191205_191210_0_191210_a000	191205_191210_0	P5
960	Xtwitches	7704	34.8837	All	p5_191205_191210_0_191210_a000	191205_191210_0	P5
961	Xtwitches	7790	86.6667	All	p5_191205_191210_0_191210_a000	191205_191210_0	P5
962	Xtwitches	7810	31.4607	All	p5_191205_191210_0_191210_a000	191205_191210_0	P5
963	Xtwitches	9224	87.1795	All	p5_191205_191210_0_191210_a000	191205_191210_0	P5
964	Xtwitches	9276	84.7059	All	p5_191205_191210_0_191210_a000	191205_191210_0	P5
965	Xtwitches	9282	58.3333	All	p5_191205_191210_0_191210_a000	191205_191210_0	P5
966	Xtwitches	9523	78.0952	All	p5_191205_191210_0_191210_a000	191205_191210_0	P5
967	Xtwitches	9727	50.7692	All	p5_191205_191210_0_191210_a000	191205_191210_0	P5
968	Xtwitches	9709	86.3636	All	p5_191205_191210_0_191210_a000	191205_191210_0	P5
969	Xtwitches	9760	81.4815	All	p5_191205_191210_0_191210_a000	191205_191210_0	P5
970	Xtwitches	9858	77.2277	All	p5_191205_191210_0_191210_a000	191205_191210_0	P5
971	Xtwitches	9948	37.594	All	p5_191205_191210_0_191210_a000	191205_191210_0	P5
972	Xtwitches	10206	64.5833	All	p5_191205_191210_0_191210_a000	191205_191210_0	P5
973	Xtwitches	10368	82.5688	All	p5_191205_191210_0_191210_a000	191205_191210_0	P5
974	Xtwitches	10474	73.913	All	p5_191205_191210_0_191210_a000	191205_191210_0	P5
975	Xtwitches	10742	85	All	p5_191205_191210_0_191210_a000	191205_191210_0	P5
976	Xtwitches	10886	77.2277	All	p5_191205_191210_0_191210_a000	191205_191210_0	P5
977	Xtwitches	10932	82.0513	All	p5_191205_191210_0_191210_a000	191205_191210_0	P5
978	Xtwitches	11339	54.8077	All	p5_191205_191210_0_191210_a000	191205_191210_0	P5
979	Xtwitches	11420	85.4167	All	p5_191205_191210_0_191210_a000	191205_191210_0	P5
980	complex_mvt	779	94.5946	All	p5_191205_191210_0_191210_a001	191205_191210_0	P5
981	complex_mvt	790	38.6364	All	p5_191205_191210_0_191210_a001	191205_191210_0	P5
982	complex_mvt	1247	64.7059	All	p5_191205_191210_0_191210_a001	191205_191210_0	P5
983	complex_mvt	1418	92	All	p5_191205_191210_0_191210_a001	191205_191210_0	P5
984	complex_mvt	1472	54.5455	All	p5_191205_191210_0_191210_a001	191205_191210_0	P5
985	complex_mvt	1551	83.871	All	p5_191205_191210_0_191210_a001	191205_191210_0	P5
986	complex_mvt	1674	100	All	p5_191205_191210_0_191210_a001	191205_191210_0	P5
987	complex_mvt	1735	84.8485	All	p5_191205_191210_0_191210_a001	191205_191210_0	P5
988	complex_mvt	1780	38.7755	All	p5_191205_191210_0_191210_a001	191205_191210_0	P5
989	complex_mvt	1905	84.6154	All	p5_191205_191210_0_191210_a001	191205_191210_0	P5
990	complex_mvt	1960	85.3659	All	p5_191205_191210_0_191210_a001	191205_191210_0	P5
991	complex_mvt	2122	90.3226	All	p5_191205_191210_0_191210_a001	191205_191210_0	P5
992	complex_mvt	2195	82.8571	All	p5_191205_191210_0_191210_a001	191205_191210_0	P5
993	complex_mvt	2734	79.4118	All	p5_191205_191210_0_191210_a001	191205_191210_0	P5
994	complex_mvt	2786	75.8621	All	p5_191205_191210_0_191210_a001	191205_191210_0	P5
995	complex_mvt	2913	100	All	p5_191205_191210_0_191210_a001	191205_191210_0	P5
996	complex_mvt	3053	60.8696	All	p5_191205_191210_0_191210_a001	191205_191210_0	P5
997	complex_mvt	3094	96.5517	All	p5_191205_191210_0_191210_a001	191205_191210_0	P5
998	complex_mvt	4001	81.8182	All	p5_191205_191210_0_191210_a001	191205_191210_0	P5
999	complex_mvt	4068	72	All	p5_191205_191210_0_191210_a001	191205_191210_0	P5
1000	complex_mvt	4186	87.7551	All	p5_191205_191210_0_191210_a001	191205_191210_0	P5
1001	complex_mvt	4325	83.3333	All	p5_191205_191210_0_191210_a001	191205_191210_0	P5
1002	complex_mvt	4685	71.4286	All	p5_191205_191210_0_191210_a001	191205_191210_0	P5
1003	complex_mvt	4726	91.1765	All	p5_191205_191210_0_191210_a001	191205_191210_0	P5
1004	complex_mvt	4914	64.4444	All	p5_191205_191210_0_191210_a001	191205_191210_0	P5
1005	complex_mvt	5057	97.7273	All	p5_191205_191210_0_191210_a001	191205_191210_0	P5
1006	complex_mvt	5182	89.2857	All	p5_191205_191210_0_191210_a001	191205_191210_0	P5
1007	complex_mvt	5596	89.7436	All	p5_191205_191210_0_191210_a001	191205_191210_0	P5
1008	complex_mvt	5753	84.2105	All	p5_191205_191210_0_191210_a001	191205_191210_0	P5
1009	complex_mvt	5835	69.2308	All	p5_191205_191210_0_191210_a001	191205_191210_0	P5
1010	complex_mvt	5875	79.4118	All	p5_191205_191210_0_191210_a001	191205_191210_0	P5
1011	complex_mvt	5912	97.2222	All	p5_191205_191210_0_191210_a001	191205_191210_0	P5
1012	complex_mvt	5992	86	All	p5_191205_191210_0_191210_a001	191205_191210_0	P5
1013	complex_mvt	6107	75	All	p5_191205_191210_0_191210_a001	191205_191210_0	P5
1014	complex_mvt	6172	94.4444	All	p5_191205_191210_0_191210_a001	191205_191210_0	P5
1015	complex_mvt	6258	76.6667	All	p5_191205_191210_0_191210_a001	191205_191210_0	P5
1016	complex_mvt	6290	86.4865	All	p5_191205_191210_0_191210_a001	191205_191210_0	P5
1017	complex_mvt	6503	84.375	All	p5_191205_191210_0_191210_a001	191205_191210_0	P5
1018	complex_mvt	6535	80	All	p5_191205_191210_0_191210_a001	191205_191210_0	P5
1019	complex_mvt	6603	81.8182	All	p5_191205_191210_0_191210_a001	191205_191210_0	P5
1020	complex_mvt	6704	76.1905	All	p5_191205_191210_0_191210_a001	191205_191210_0	P5
1021	complex_mvt	7090	85.7143	All	p5_191205_191210_0_191210_a001	191205_191210_0	P5
1022	complex_mvt	7147	70.9677	All	p5_191205_191210_0_191210_a001	191205_191210_0	P5
1023	complex_mvt	7241	66.6667	All	p5_191205_191210_0_191210_a001	191205_191210_0	P5
1024	complex_mvt	7301	67.7419	All	p5_191205_191210_0_191210_a001	191205_191210_0	P5
1025	complex_mvt	7390	78.7234	All	p5_191205_191210_0_191210_a001	191205_191210_0	P5
1026	complex_mvt	7431	100	All	p5_191205_191210_0_191210_a001	191205_191210_0	P5
1027	complex_mvt	7519	100	All	p5_191205_191210_0_191210_a001	191205_191210_0	P5
1028	complex_mvt	7598	84.0909	All	p5_191205_191210_0_191210_a001	191205_191210_0	P5
1029	complex_mvt	7644	79.4872	All	p5_191205_191210_0_191210_a001	191205_191210_0	P5
1030	complex_mvt	7681	82.6087	All	p5_191205_191210_0_191210_a001	191205_191210_0	P5
1031	complex_mvt	7755	52.2727	All	p5_191205_191210_0_191210_a001	191205_191210_0	P5
1032	complex_mvt	7858	78.9474	All	p5_191205_191210_0_191210_a001	191205_191210_0	P5
1033	complex_mvt	7896	60	All	p5_191205_191210_0_191210_a001	191205_191210_0	P5
1034	complex_mvt	7930	82.6923	All	p5_191205_191210_0_191210_a001	191205_191210_0	P5
1035	complex_mvt	8042	85.7143	All	p5_191205_191210_0_191210_a001	191205_191210_0	P5
1036	complex_mvt	8121	87.1795	All	p5_191205_191210_0_191210_a001	191205_191210_0	P5
1037	complex_mvt	8185	81.8182	All	p5_191205_191210_0_191210_a001	191205_191210_0	P5
1038	complex_mvt	8216	53.8462	All	p5_191205_191210_0_191210_a001	191205_191210_0	P5
1039	complex_mvt	8259	66.6667	All	p5_191205_191210_0_191210_a001	191205_191210_0	P5
1040	complex_mvt	8412	72.2222	All	p5_191205_191210_0_191210_a001	191205_191210_0	P5
1041	complex_mvt	8488	87.8049	All	p5_191205_191210_0_191210_a001	191205_191210_0	P5
1042	complex_mvt	8534	66.6667	All	p5_191205_191210_0_191210_a001	191205_191210_0	P5
1043	complex_mvt	8669	93.3333	All	p5_191205_191210_0_191210_a001	191205_191210_0	P5
1044	complex_mvt	8743	69.5652	All	p5_191205_191210_0_191210_a001	191205_191210_0	P5
1045	complex_mvt	8856	68.5185	All	p5_191205_191210_0_191210_a001	191205_191210_0	P5
1046	complex_mvt	9027	78.5714	All	p5_191205_191210_0_191210_a001	191205_191210_0	P5
1047	complex_mvt	9069	72.4138	All	p5_191205_191210_0_191210_a001	191205_191210_0	P5
1048	complex_mvt	9119	56.8627	All	p5_191205_191210_0_191210_a001	191205_191210_0	P5
1049	complex_mvt	9194	60.5263	All	p5_191205_191210_0_191210_a001	191205_191210_0	P5
1050	complex_mvt	9327	92.3077	All	p5_191205_191210_0_191210_a001	191205_191210_0	P5
1051	complex_mvt	9790	67.6471	All	p5_191205_191210_0_191210_a001	191205_191210_0	P5
1052	complex_mvt	9915	74.4186	All	p5_191205_191210_0_191210_a001	191205_191210_0	P5
1053	complex_mvt	10051	66.6667	All	p5_191205_191210_0_191210_a001	191205_191210_0	P5
1054	complex_mvt	10106	45.614	All	p5_191205_191210_0_191210_a001	191205_191210_0	P5
1055	complex_mvt	10215	65.3061	All	p5_191205_191210_0_191210_a001	191205_191210_0	P5
1056	complex_mvt	10233	46.2963	All	p5_191205_191210_0_191210_a001	191205_191210_0	P5
1057	complex_mvt	10298	48.0769	All	p5_191205_191210_0_191210_a001	191205_191210_0	P5
1058	complex_mvt	10399	74.4681	All	p5_191205_191210_0_191210_a001	191205_191210_0	P5
1059	complex_mvt	10471	80	All	p5_191205_191210_0_191210_a001	191205_191210_0	P5
1060	complex_mvt	10501	61.7021	All	p5_191205_191210_0_191210_a001	191205_191210_0	P5
1061	complex_mvt	10561	92.5	All	p5_191205_191210_0_191210_a001	191205_191210_0	P5
1062	complex_mvt	10633	86.1111	All	p5_191205_191210_0_191210_a001	191205_191210_0	P5
1063	complex_mvt	10709	80.9524	All	p5_191205_191210_0_191210_a001	191205_191210_0	P5
1064	complex_mvt	10804	86.6667	All	p5_191205_191210_0_191210_a001	191205_191210_0	P5
1065	complex_mvt	10851	64.4444	All	p5_191205_191210_0_191210_a001	191205_191210_0	P5
1066	complex_mvt	10946	70.8333	All	p5_191205_191210_0_191210_a001	191205_191210_0	P5
1067	complex_mvt	11015	83.3333	All	p5_191205_191210_0_191210_a001	191205_191210_0	P5
1068	complex_mvt	11127	65.7143	All	p5_191205_191210_0_191210_a001	191205_191210_0	P5
1069	complex_mvt	11232	82.2222	All	p5_191205_191210_0_191210_a001	191205_191210_0	P5
1070	complex_mvt	11274	81.4815	All	p5_191205_191210_0_191210_a001	191205_191210_0	P5
1071	complex_mvt	11429	58.9744	All	p5_191205_191210_0_191210_a001	191205_191210_0	P5
1072	complex_mvt	11469	50	All	p5_191205_191210_0_191210_a001	191205_191210_0	P5
1073	complex_mvt	11534	71.1538	All	p5_191205_191210_0_191210_a001	191205_191210_0	P5
1074	complex_mvt	11590	60.8696	All	p5_191205_191210_0_191210_a001	191205_191210_0	P5
1075	complex_mvt	11635	34.7826	All	p5_191205_191210_0_191210_a001	191205_191210_0	P5
1076	complex_mvt	11687	82.5	All	p5_191205_191210_0_191210_a001	191205_191210_0	P5
1077	complex_mvt	11720	57.6923	All	p5_191205_191210_0_191210_a001	191205_191210_0	P5
1078	complex_mvt	11824	78.125	All	p5_191205_191210_0_191210_a001	191205_191210_0	P5
1079	complex_mvt	11914	62.963	All	p5_191205_191210_0_191210_a001	191205_191210_0	P5
1080	complex_mvt	11956	88.6364	All	p5_191205_191210_0_191210_a001	191205_191210_0	P5
1081	complex_mvt	12012	77.2727	All	p5_191205_191210_0_191210_a001	191205_191210_0	P5
1082	complex_mvt	12084	65.3846	All	p5_191205_191210_0_191210_a001	191205_191210_0	P5
1083	complex_mvt	12127	88	All	p5_191205_191210_0_191210_a001	191205_191210_0	P5
1084	complex_mvt	12233	80.8511	All	p5_191205_191210_0_191210_a001	191205_191210_0	P5
1085	complex_mvt	12335	81.25	All	p5_191205_191210_0_191210_a001	191205_191210_0	P5
1086	complex_mvt	12433	74.4681	All	p5_191205_191210_0_191210_a001	191205_191210_0	P5
1087	complex_mvt	200	80	All	p5_191205_191210_0_191210_a001	191205_191210_0	P5
1088	complex_mvt	9509	70.2128	All	p5_191205_191210_0_191210_a001	191205_191210_0	P5
1089	complex_mvt	9622	66.6667	All	p5_191205_191210_0_191210_a001	191205_191210_0	P5
1090	complex_mvt	9703	50	All	p5_191205_191210_0_191210_a001	191205_191210_0	P5
1091	mvt_forelimb_left	2673	23.5294	All	p5_191205_191210_0_191210_a001	191205_191210_0	P5
1092	mvt_forelimb_left	4449	40	All	p5_191205_191210_0_191210_a001	191205_191210_0	P5
1093	mvt_forelimb_left	6064	36.3636	All	p5_191205_191210_0_191210_a001	191205_191210_0	P5
1094	mvt_forelimb_left	8984	41.9355	All	p5_191205_191210_0_191210_a001	191205_191210_0	P5
1095	mvt_forelimb_left	9475	90	All	p5_191205_191210_0_191210_a001	191205_191210_0	P5
1096	mvt_forelimb_left	9724	33.3333	All	p5_191205_191210_0_191210_a001	191205_191210_0	P5
1097	mvt_forelimb_left	10170	38.0952	All	p5_191205_191210_0_191210_a001	191205_191210_0	P5
1098	mvt_forelimb_left	11194	41.3793	All	p5_191205_191210_0_191210_a001	191205_191210_0	P5
1099	mvt_forelimb_left	11273	92.3077	All	p5_191205_191210_0_191210_a001	191205_191210_0	P5
1100	mvt_forelimb_left	11366	18.75	All	p5_191205_191210_0_191210_a001	191205_191210_0	P5
1101	mvt_forelimb_left	11480	42.8571	All	p5_191205_191210_0_191210_a001	191205_191210_0	P5
1102	mvt_forelimb_left	11714	60.8696	All	p5_191205_191210_0_191210_a001	191205_191210_0	P5
1103	mvt_forelimb_left	12398	32	All	p5_191205_191210_0_191210_a001	191205_191210_0	P5
1104	mvt_forelimb_right	324	30	All	p5_191205_191210_0_191210_a001	191205_191210_0	P5
1105	mvt_forelimb_right	1104	11.1111	All	p5_191205_191210_0_191210_a001	191205_191210_0	P5
1106	mvt_forelimb_right	1394	27.2727	All	p5_191205_191210_0_191210_a001	191205_191210_0	P5
1107	mvt_forelimb_right	2584	25	All	p5_191205_191210_0_191210_a001	191205_191210_0	P5
1108	mvt_forelimb_right	2647	47.3684	All	p5_191205_191210_0_191210_a001	191205_191210_0	P5
1109	mvt_forelimb_right	2814	28.5714	All	p5_191205_191210_0_191210_a001	191205_191210_0	P5
1110	mvt_forelimb_right	3409	7.14286	All	p5_191205_191210_0_191210_a001	191205_191210_0	P5
1111	mvt_forelimb_right	3603	41.6667	All	p5_191205_191210_0_191210_a001	191205_191210_0	P5
1112	mvt_forelimb_right	7590	77.4194	All	p5_191205_191210_0_191210_a001	191205_191210_0	P5
1113	mvt_forelimb_right	9722	33.3333	All	p5_191205_191210_0_191210_a001	191205_191210_0	P5
1114	mvt_forelimb_right	10172	40	All	p5_191205_191210_0_191210_a001	191205_191210_0	P5
1115	mvt_forelimb_right	11364	20	All	p5_191205_191210_0_191210_a001	191205_191210_0	P5
1116	mvt_forelimb_right	116	17.6471	All	p5_191205_191210_0_191210_a001	191205_191210_0	P5
1117	mvt_forelimb_right	385	100	All	p5_191205_191210_0_191210_a001	191205_191210_0	P5
1118	mvt_forelimb_right	527	25.9259	All	p5_191205_191210_0_191210_a001	191205_191210_0	P5
1119	mvt_forelimb_right	617	29.2683	All	p5_191205_191210_0_191210_a001	191205_191210_0	P5
1120	mvt_forelimb_right	662	77.2727	All	p5_191205_191210_0_191210_a001	191205_191210_0	P5
1121	mvt_forelimb_right	743	80	All	p5_191205_191210_0_191210_a001	191205_191210_0	P5
1122	mvt_forelimb_right	939	5.55556	All	p5_191205_191210_0_191210_a001	191205_191210_0	P5
1123	mvt_forelimb_right	957	94.7368	All	p5_191205_191210_0_191210_a001	191205_191210_0	P5
1124	mvt_forelimb_right	991	70	All	p5_191205_191210_0_191210_a001	191205_191210_0	P5
1125	mvt_forelimb_right	1202	0	All	p5_191205_191210_0_191210_a001	191205_191210_0	P5
1126	mvt_forelimb_right	3741	34.7826	All	p5_191205_191210_0_191210_a001	191205_191210_0	P5
1127	mvt_hindlimb_left	8449	78.5714	All	p5_191205_191210_0_191210_a001	191205_191210_0	P5
1128	mvt_hindlimb_left	9479	45.4545	All	p5_191205_191210_0_191210_a001	191205_191210_0	P5
1129	mvt_hindlimb_left	10166	36	All	p5_191205_191210_0_191210_a001	191205_191210_0	P5
1130	mvt_hindlimb_left	11910	48.5714	All	p5_191205_191210_0_191210_a001	191205_191210_0	P5
1131	mvt_hindlimb_right	9478	40	All	p5_191205_191210_0_191210_a001	191205_191210_0	P5
1132	mvt_hindlimb_right	10171	40	All	p5_191205_191210_0_191210_a001	191205_191210_0	P5
1133	mvt_hindlimb_right	12400	30.7692	All	p5_191205_191210_0_191210_a001	191205_191210_0	P5
1134	startle	920	95.4545	All	p5_191205_191210_0_191210_a001	191205_191210_0	P5
1135	startle	1007	75.8621	All	p5_191205_191210_0_191210_a001	191205_191210_0	P5
1136	startle	1159	37.5	All	p5_191205_191210_0_191210_a001	191205_191210_0	P5
1137	startle	1187	85.7143	All	p5_191205_191210_0_191210_a001	191205_191210_0	P5
1138	startle	2038	84.8485	All	p5_191205_191210_0_191210_a001	191205_191210_0	P5
1139	startle	2052	25.641	All	p5_191205_191210_0_191210_a001	191205_191210_0	P5
1140	startle	2083	72.973	All	p5_191205_191210_0_191210_a001	191205_191210_0	P5
1141	startle	2234	62.2222	All	p5_191205_191210_0_191210_a001	191205_191210_0	P5
1142	startle	2315	65.625	All	p5_191205_191210_0_191210_a001	191205_191210_0	P5
1143	startle	2394	77.7778	All	p5_191205_191210_0_191210_a001	191205_191210_0	P5
1144	startle	2531	85.7143	All	p5_191205_191210_0_191210_a001	191205_191210_0	P5
1145	startle	2564	100	All	p5_191205_191210_0_191210_a001	191205_191210_0	P5
1146	startle	2609	85.7143	All	p5_191205_191210_0_191210_a001	191205_191210_0	P5
1147	startle	2659	58.3333	All	p5_191205_191210_0_191210_a001	191205_191210_0	P5
1148	startle	2873	70.2703	All	p5_191205_191210_0_191210_a001	191205_191210_0	P5
1149	startle	2964	95	All	p5_191205_191210_0_191210_a001	191205_191210_0	P5
1150	startle	3194	88	All	p5_191205_191210_0_191210_a001	191205_191210_0	P5
1151	startle	3261	82.6087	All	p5_191205_191210_0_191210_a001	191205_191210_0	P5
1152	startle	3292	100	All	p5_191205_191210_0_191210_a001	191205_191210_0	P5
1153	startle	3403	33.3333	All	p5_191205_191210_0_191210_a001	191205_191210_0	P5
1154	startle	3442	72	All	p5_191205_191210_0_191210_a001	191205_191210_0	P5
1155	startle	3496	93.1034	All	p5_191205_191210_0_191210_a001	191205_191210_0	P5
1156	startle	3575	58.3333	All	p5_191205_191210_0_191210_a001	191205_191210_0	P5
1157	startle	3615	58.8235	All	p5_191205_191210_0_191210_a001	191205_191210_0	P5
1158	startle	3673	77.4194	All	p5_191205_191210_0_191210_a001	191205_191210_0	P5
1159	startle	3727	78.0488	All	p5_191205_191210_0_191210_a001	191205_191210_0	P5
1160	startle	3767	69.2308	All	p5_191205_191210_0_191210_a001	191205_191210_0	P5
1161	startle	3853	85	All	p5_191205_191210_0_191210_a001	191205_191210_0	P5
1162	startle	3943	65	All	p5_191205_191210_0_191210_a001	191205_191210_0	P5
1163	startle	4422	85.3659	All	p5_191205_191210_0_191210_a001	191205_191210_0	P5
1164	startle	4440	35.8491	All	p5_191205_191210_0_191210_a001	191205_191210_0	P5
1165	startle	4507	88.2353	All	p5_191205_191210_0_191210_a001	191205_191210_0	P5
1166	startle	4604	92.6829	All	p5_191205_191210_0_191210_a001	191205_191210_0	P5
1167	startle	4609	46.5116	All	p5_191205_191210_0_191210_a001	191205_191210_0	P5
1168	startle	4654	86.4865	All	p5_191205_191210_0_191210_a001	191205_191210_0	P5
1169	startle	5481	95.8333	All	p5_191205_191210_0_191210_a001	191205_191210_0	P5
1170	startle	5516	88.4615	All	p5_191205_191210_0_191210_a001	191205_191210_0	P5
1171	startle	8380	74.5098	All	p5_191205_191210_0_191210_a001	191205_191210_0	P5
1172	startle	9743	60.8696	All	p5_191205_191210_0_191210_a001	191205_191210_0	P5
1173	startle	47	75	All	p5_191205_191210_0_191210_a001	191205_191210_0	P5
1174	startle	98	51.8519	All	p5_191205_191210_0_191210_a001	191205_191210_0	P5
1175	startle	266	87.5	All	p5_191205_191210_0_191210_a001	191205_191210_0	P5
1176	startle	349	71.0526	All	p5_191205_191210_0_191210_a001	191205_191210_0	P5
1177	startle	479	60	All	p5_191205_191210_0_191210_a001	191205_191210_0	P5
1178	startle	516	75.8621	All	p5_191205_191210_0_191210_a001	191205_191210_0	P5
1179	startle	673	90.3226	All	p5_191205_191210_0_191210_a001	191205_191210_0	P5
1180	startle	716	70	All	p5_191205_191210_0_191210_a001	191205_191210_0	P5
1181	startle	963	78.9474	All	p5_191205_191210_0_191210_a001	191205_191210_0	P5
1182	startle	3917	81.4815	All	p5_191205_191210_0_191210_a001	191205_191210_0	P5
1183	twitch_forelimb_left	316	23.8095	All	p5_191205_191210_0_191210_a001	191205_191210_0	P5
1184	twitch_forelimb_left	1072	62.2222	All	p5_191205_191210_0_191210_a001	191205_191210_0	P5
1185	twitch_forelimb_left	2631	40.4255	All	p5_191205_191210_0_191210_a001	191205_191210_0	P5
1186	twitch_forelimb_left	2636	34.1463	All	p5_191205_191210_0_191210_a001	191205_191210_0	P5
1187	twitch_forelimb_left	8022	62.5	All	p5_191205_191210_0_191210_a001	191205_191210_0	P5
1188	twitch_forelimb_left	172	89.2857	All	p5_191205_191210_0_191210_a001	191205_191210_0	P5
1189	twitch_forelimb_left	303	70	All	p5_191205_191210_0_191210_a001	191205_191210_0	P5
1190	twitch_forelimb_left	521	48.3871	All	p5_191205_191210_0_191210_a001	191205_191210_0	P5
1191	twitch_forelimb_left	584	76.6667	All	p5_191205_191210_0_191210_a001	191205_191210_0	P5
1192	twitch_forelimb_left	606	55.7692	All	p5_191205_191210_0_191210_a001	191205_191210_0	P5
1193	twitch_forelimb_left	883	72	All	p5_191205_191210_0_191210_a001	191205_191210_0	P5
1194	twitch_forelimb_left	2634	42.5532	All	p5_191205_191210_0_191210_a001	191205_191210_0	P5
1195	twitch_forelimb_left	3924	45.8333	All	p5_191205_191210_0_191210_a001	191205_191210_0	P5
1196	twitch_forelimb_right	1041	76.9231	All	p5_191205_191210_0_191210_a001	191205_191210_0	P5
1197	twitch_forelimb_right	1072	62.2222	All	p5_191205_191210_0_191210_a001	191205_191210_0	P5
1198	twitch_forelimb_right	2090	28.5714	All	p5_191205_191210_0_191210_a001	191205_191210_0	P5
1199	twitch_forelimb_right	2556	100	All	p5_191205_191210_0_191210_a001	191205_191210_0	P5
1200	twitch_forelimb_right	2632	36.3636	All	p5_191205_191210_0_191210_a001	191205_191210_0	P5
1201	twitch_forelimb_right	2637	26.8293	All	p5_191205_191210_0_191210_a001	191205_191210_0	P5
1202	twitch_forelimb_right	3349	38.2979	All	p5_191205_191210_0_191210_a001	191205_191210_0	P5
1203	twitch_forelimb_right	3820	59.0909	All	p5_191205_191210_0_191210_a001	191205_191210_0	P5
1204	twitch_forelimb_right	4659	42.1053	All	p5_191205_191210_0_191210_a001	191205_191210_0	P5
1205	twitch_forelimb_right	52	64.2857	All	p5_191205_191210_0_191210_a001	191205_191210_0	P5
1206	twitch_forelimb_right	67	25	All	p5_191205_191210_0_191210_a001	191205_191210_0	P5
1207	twitch_forelimb_right	107	36.3636	All	p5_191205_191210_0_191210_a001	191205_191210_0	P5
1208	twitch_forelimb_right	172	89.2857	All	p5_191205_191210_0_191210_a001	191205_191210_0	P5
1209	twitch_forelimb_right	303	70	All	p5_191205_191210_0_191210_a001	191205_191210_0	P5
1210	twitch_forelimb_right	307	33.3333	All	p5_191205_191210_0_191210_a001	191205_191210_0	P5
1211	twitch_forelimb_right	470	100	All	p5_191205_191210_0_191210_a001	191205_191210_0	P5
1212	twitch_forelimb_right	501	87.5	All	p5_191205_191210_0_191210_a001	191205_191210_0	P5
1213	twitch_forelimb_right	519	53.3333	All	p5_191205_191210_0_191210_a001	191205_191210_0	P5
1214	twitch_forelimb_right	584	76.6667	All	p5_191205_191210_0_191210_a001	191205_191210_0	P5
1215	twitch_forelimb_right	606	54	All	p5_191205_191210_0_191210_a001	191205_191210_0	P5
1216	twitch_forelimb_right	887	33.3333	All	p5_191205_191210_0_191210_a001	191205_191210_0	P5
1217	twitch_forelimb_right	1017	32	All	p5_191205_191210_0_191210_a001	191205_191210_0	P5
1218	twitch_forelimb_right	2666	19.0476	All	p5_191205_191210_0_191210_a001	191205_191210_0	P5
1219	twitch_forelimb_right	3504	34.4828	All	p5_191205_191210_0_191210_a001	191205_191210_0	P5
1220	twitch_forelimb_right	3663	88.8889	All	p5_191205_191210_0_191210_a001	191205_191210_0	P5
1221	twitch_forelimb_right	3686	7.14286	All	p5_191205_191210_0_191210_a001	191205_191210_0	P5
1222	twitch_hindlimb_left	2351	69.2308	All	p5_191205_191210_0_191210_a001	191205_191210_0	P5
1223	twitch_hindlimb_left	2358	42.8571	All	p5_191205_191210_0_191210_a001	191205_191210_0	P5
1224	twitch_hindlimb_left	2632	36.3636	All	p5_191205_191210_0_191210_a001	191205_191210_0	P5
1225	twitch_hindlimb_left	2636	34.1463	All	p5_191205_191210_0_191210_a001	191205_191210_0	P5
1226	twitch_hindlimb_left	8022	62.5	All	p5_191205_191210_0_191210_a001	191205_191210_0	P5
1227	twitch_hindlimb_left	303	70	All	p5_191205_191210_0_191210_a001	191205_191210_0	P5
1228	twitch_hindlimb_left	2606	90.625	All	p5_191205_191210_0_191210_a001	191205_191210_0	P5
1229	twitch_hindlimb_left	3349	38.2979	All	p5_191205_191210_0_191210_a001	191205_191210_0	P5
1230	twitch_hindlimb_left	3923	46.1538	All	p5_191205_191210_0_191210_a001	191205_191210_0	P5
1231	twitch_hindlimb_right	607	52	All	p5_191205_191210_0_191210_a001	191205_191210_0	P5
1232	twitch_hindlimb_right	2634	40	All	p5_191205_191210_0_191210_a001	191205_191210_0	P5
1233	twitch_hindlimb_right	586	75	All	p5_191205_191210_0_191210_a001	191205_191210_0	P5
1234	twitch_hindlimb_right	718	63.1579	All	p5_191205_191210_0_191210_a001	191205_191210_0	P5
1235	twitch_tail	607	52	All	p5_191205_191210_0_191210_a001	191205_191210_0	P5
1236	twitch_tail	1072	62.2222	All	p5_191205_191210_0_191210_a001	191205_191210_0	P5
1237	twitch_tail	2480	50	All	p5_191205_191210_0_191210_a001	191205_191210_0	P5
1238	twitch_tail	10171	40	All	p5_191205_191210_0_191210_a001	191205_191210_0	P5
1239	twitch_tail	12400	30.7692	All	p5_191205_191210_0_191210_a001	191205_191210_0	P5
1240	twitch_tail	21	66.6667	All	p5_191205_191210_0_191210_a001	191205_191210_0	P5
1241	twitch_tail	171	93.1034	All	p5_191205_191210_0_191210_a001	191205_191210_0	P5
1242	twitch_tail	303	70	All	p5_191205_191210_0_191210_a001	191205_191210_0	P5
1243	twitch_tail	584	76.6667	All	p5_191205_191210_0_191210_a001	191205_191210_0	P5
1244	twitch_tail	2393	85.7143	All	p5_191205_191210_0_191210_a001	191205_191210_0	P5
1245	twitch_tail	3347	38.6364	All	p5_191205_191210_0_191210_a001	191205_191210_0	P5
1246	Xcomplexe_movements	53	77.4194	All	p5_191205_191210_1_191210_a000	191205_191210_1	P5
1247	Xstartles	835	100	All	p5_191205_191210_1_191210_a000	191205_191210_1	P5
1248	Xstartles	2908	62.7907	All	p5_191205_191210_1_191210_a000	191205_191210_1	P5
1249	Xstartles	3419	65	All	p5_191205_191210_1_191210_a000	191205_191210_1	P5
1250	Xstartles	3435	30.2083	All	p5_191205_191210_1_191210_a000	191205_191210_1	P5
1251	Xstartles	4805	80.303	All	p5_191205_191210_1_191210_a000	191205_191210_1	P5
1252	Xstartles	6781	86.9565	All	p5_191205_191210_1_191210_a000	191205_191210_1	P5
1253	Xstartles	7024	23.8095	All	p5_191205_191210_1_191210_a000	191205_191210_1	P5
1254	Xstartles	7159	39.3701	All	p5_191205_191210_1_191210_a000	191205_191210_1	P5
1255	Xstartles	7223	78.2609	All	p5_191205_191210_1_191210_a000	191205_191210_1	P5
1256	Xstartles	7521	52.6316	All	p5_191205_191210_1_191210_a000	191205_191210_1	P5
1257	Xstartles	9310	85.7143	All	p5_191205_191210_1_191210_a000	191205_191210_1	P5
1258	Xstartles	10137	88.8	All	p5_191205_191210_1_191210_a000	191205_191210_1	P5
1259	Xstartles	10827	89.8148	All	p5_191205_191210_1_191210_a000	191205_191210_1	P5
1260	Xstartles	10836	42.735	All	p5_191205_191210_1_191210_a000	191205_191210_1	P5
1261	Xstartles	10847	10.4167	All	p5_191205_191210_1_191210_a000	191205_191210_1	P5
1262	Xstartles	11252	84.6154	All	p5_191205_191210_1_191210_a000	191205_191210_1	P5
1263	Xstartles	11339	46.9136	All	p5_191205_191210_1_191210_a000	191205_191210_1	P5
1264	Xstartles	11552	56	All	p5_191205_191210_1_191210_a000	191205_191210_1	P5
1265	Xstartles	11657	73.8462	All	p5_191205_191210_1_191210_a000	191205_191210_1	P5
1266	Xstartles	12115	45.6897	All	p5_191205_191210_1_191210_a000	191205_191210_1	P5
1267	Xstartles	12167	83.0769	All	p5_191205_191210_1_191210_a000	191205_191210_1	P5
1268	Xtwitches	433	79.2453	All	p5_191205_191210_1_191210_a000	191205_191210_1	P5
1269	Xtwitches	593	70.1754	All	p5_191205_191210_1_191210_a000	191205_191210_1	P5
1270	Xtwitches	1124	84.3373	All	p5_191205_191210_1_191210_a000	191205_191210_1	P5
1271	Xtwitches	1680	62.9213	All	p5_191205_191210_1_191210_a000	191205_191210_1	P5
1272	Xtwitches	1806	44.4444	All	p5_191205_191210_1_191210_a000	191205_191210_1	P5
1273	Xtwitches	1910	78.3133	All	p5_191205_191210_1_191210_a000	191205_191210_1	P5
1274	Xtwitches	1913	75	All	p5_191205_191210_1_191210_a000	191205_191210_1	P5
1275	Xtwitches	2099	90.9836	All	p5_191205_191210_1_191210_a000	191205_191210_1	P5
1276	Xtwitches	2474	63.6364	All	p5_191205_191210_1_191210_a000	191205_191210_1	P5
1277	Xtwitches	2571	79.7297	All	p5_191205_191210_1_191210_a000	191205_191210_1	P5
1278	Xtwitches	2719	82.9787	All	p5_191205_191210_1_191210_a000	191205_191210_1	P5
1279	Xtwitches	2867	97.3214	All	p5_191205_191210_1_191210_a000	191205_191210_1	P5
1280	Xtwitches	3092	24.5283	All	p5_191205_191210_1_191210_a000	191205_191210_1	P5
1281	Xtwitches	3161	61.3208	All	p5_191205_191210_1_191210_a000	191205_191210_1	P5
1282	Xtwitches	3371	44.7761	All	p5_191205_191210_1_191210_a000	191205_191210_1	P5
1283	Xtwitches	3574	87.6543	All	p5_191205_191210_1_191210_a000	191205_191210_1	P5
1284	Xtwitches	3708	40.5797	All	p5_191205_191210_1_191210_a000	191205_191210_1	P5
1285	Xtwitches	3787	76.2295	All	p5_191205_191210_1_191210_a000	191205_191210_1	P5
1286	Xtwitches	3799	51.0791	All	p5_191205_191210_1_191210_a000	191205_191210_1	P5
1287	Xtwitches	4131	52.5424	All	p5_191205_191210_1_191210_a000	191205_191210_1	P5
1288	Xtwitches	4241	81.25	All	p5_191205_191210_1_191210_a000	191205_191210_1	P5
1289	Xtwitches	4575	85.5072	All	p5_191205_191210_1_191210_a000	191205_191210_1	P5
1290	Xtwitches	4677	81.0127	All	p5_191205_191210_1_191210_a000	191205_191210_1	P5
1291	Xtwitches	4684	50.2674	All	p5_191205_191210_1_191210_a000	191205_191210_1	P5
1292	Xtwitches	4957	88.1579	All	p5_191205_191210_1_191210_a000	191205_191210_1	P5
1293	Xtwitches	5042	86.1111	All	p5_191205_191210_1_191210_a000	191205_191210_1	P5
1294	Xtwitches	5052	24.0385	All	p5_191205_191210_1_191210_a000	191205_191210_1	P5
1295	Xtwitches	5172	76.0274	All	p5_191205_191210_1_191210_a000	191205_191210_1	P5
1296	Xtwitches	5177	42.8571	All	p5_191205_191210_1_191210_a000	191205_191210_1	P5
1297	Xtwitches	5279	90	All	p5_191205_191210_1_191210_a000	191205_191210_1	P5
1298	Xtwitches	5356	84.9057	All	p5_191205_191210_1_191210_a000	191205_191210_1	P5
1299	Xtwitches	5426	88.0597	All	p5_191205_191210_1_191210_a000	191205_191210_1	P5
1300	Xtwitches	5564	65.0407	All	p5_191205_191210_1_191210_a000	191205_191210_1	P5
1301	Xtwitches	5700	84.2466	All	p5_191205_191210_1_191210_a000	191205_191210_1	P5
1302	Xtwitches	5870	73.1959	All	p5_191205_191210_1_191210_a000	191205_191210_1	P5
1303	Xtwitches	6060	51.2605	All	p5_191205_191210_1_191210_a000	191205_191210_1	P5
1304	Xtwitches	6211	93.1507	All	p5_191205_191210_1_191210_a000	191205_191210_1	P5
1305	Xtwitches	6366	13.1148	All	p5_191205_191210_1_191210_a000	191205_191210_1	P5
1306	Xtwitches	6513	60.8247	All	p5_191205_191210_1_191210_a000	191205_191210_1	P5
1307	Xtwitches	6693	46.281	All	p5_191205_191210_1_191210_a000	191205_191210_1	P5
1308	Xtwitches	6947	50.4854	All	p5_191205_191210_1_191210_a000	191205_191210_1	P5
1309	Xtwitches	6953	51.9608	All	p5_191205_191210_1_191210_a000	191205_191210_1	P5
1310	Xtwitches	7007	91.6667	All	p5_191205_191210_1_191210_a000	191205_191210_1	P5
1311	Xtwitches	7147	58.2734	All	p5_191205_191210_1_191210_a000	191205_191210_1	P5
1312	Xtwitches	7334	50.9434	All	p5_191205_191210_1_191210_a000	191205_191210_1	P5
1313	Xtwitches	7407	79.0123	All	p5_191205_191210_1_191210_a000	191205_191210_1	P5
1314	Xtwitches	7460	42.9577	All	p5_191205_191210_1_191210_a000	191205_191210_1	P5
1315	Xtwitches	7471	35	All	p5_191205_191210_1_191210_a000	191205_191210_1	P5
1316	Xtwitches	7674	87.5	All	p5_191205_191210_1_191210_a000	191205_191210_1	P5
1317	Xtwitches	7783	76.1905	All	p5_191205_191210_1_191210_a000	191205_191210_1	P5
1318	Xtwitches	7858	44.2623	All	p5_191205_191210_1_191210_a000	191205_191210_1	P5
1319	Xtwitches	7875	57.1429	All	p5_191205_191210_1_191210_a000	191205_191210_1	P5
1320	Xtwitches	7884	28.7234	All	p5_191205_191210_1_191210_a000	191205_191210_1	P5
1321	Xtwitches	8068	91.2621	All	p5_191205_191210_1_191210_a000	191205_191210_1	P5
1322	Xtwitches	8191	63.4921	All	p5_191205_191210_1_191210_a000	191205_191210_1	P5
1323	Xtwitches	8431	53.5211	All	p5_191205_191210_1_191210_a000	191205_191210_1	P5
1324	Xtwitches	8467	81.5217	All	p5_191205_191210_1_191210_a000	191205_191210_1	P5
1325	Xtwitches	8565	82.6087	All	p5_191205_191210_1_191210_a000	191205_191210_1	P5
1326	Xtwitches	8639	70	All	p5_191205_191210_1_191210_a000	191205_191210_1	P5
1327	Xtwitches	8656	77.8947	All	p5_191205_191210_1_191210_a000	191205_191210_1	P5
1328	Xtwitches	8737	83.871	All	p5_191205_191210_1_191210_a000	191205_191210_1	P5
1329	Xtwitches	8818	71.4286	All	p5_191205_191210_1_191210_a000	191205_191210_1	P5
1330	Xtwitches	8851	58.6777	All	p5_191205_191210_1_191210_a000	191205_191210_1	P5
1331	Xtwitches	8909	53.9062	All	p5_191205_191210_1_191210_a000	191205_191210_1	P5
1332	Xtwitches	9002	77.5	All	p5_191205_191210_1_191210_a000	191205_191210_1	P5
1333	Xtwitches	9021	40.5941	All	p5_191205_191210_1_191210_a000	191205_191210_1	P5
1334	Xtwitches	9139	44	All	p5_191205_191210_1_191210_a000	191205_191210_1	P5
1335	Xtwitches	9233	58.7302	All	p5_191205_191210_1_191210_a000	191205_191210_1	P5
1336	Xtwitches	9411	45.3704	All	p5_191205_191210_1_191210_a000	191205_191210_1	P5
1337	Xtwitches	9512	46.8085	All	p5_191205_191210_1_191210_a000	191205_191210_1	P5
1338	Xtwitches	9584	71.4286	All	p5_191205_191210_1_191210_a000	191205_191210_1	P5
1339	Xtwitches	9665	80.1282	All	p5_191205_191210_1_191210_a000	191205_191210_1	P5
1340	Xtwitches	9825	53.4884	All	p5_191205_191210_1_191210_a000	191205_191210_1	P5
1341	Xtwitches	9856	74.1007	All	p5_191205_191210_1_191210_a000	191205_191210_1	P5
1342	Xtwitches	9864	40.9396	All	p5_191205_191210_1_191210_a000	191205_191210_1	P5
1343	Xtwitches	10032	69.5122	All	p5_191205_191210_1_191210_a000	191205_191210_1	P5
1344	Xtwitches	10238	48.5149	All	p5_191205_191210_1_191210_a000	191205_191210_1	P5
1345	Xtwitches	10297	81.5789	All	p5_191205_191210_1_191210_a000	191205_191210_1	P5
1346	Xtwitches	10395	79	All	p5_191205_191210_1_191210_a000	191205_191210_1	P5
1347	Xtwitches	10491	83.5821	All	p5_191205_191210_1_191210_a000	191205_191210_1	P5
1348	Xtwitches	10563	85	All	p5_191205_191210_1_191210_a000	191205_191210_1	P5
1349	Xtwitches	10705	60.9023	All	p5_191205_191210_1_191210_a000	191205_191210_1	P5
1350	Xtwitches	11127	91.8919	All	p5_191205_191210_1_191210_a000	191205_191210_1	P5
1351	Xtwitches	11320	62.1951	All	p5_191205_191210_1_191210_a000	191205_191210_1	P5
1352	Xtwitches	11448	83.8384	All	p5_191205_191210_1_191210_a000	191205_191210_1	P5
1353	Xtwitches	11762	91.5789	All	p5_191205_191210_1_191210_a000	191205_191210_1	P5
1354	Xtwitches	11903	92.1875	All	p5_191205_191210_1_191210_a000	191205_191210_1	P5
1355	Xtwitches	11934	51.0067	All	p5_191205_191210_1_191210_a000	191205_191210_1	P5
1356	Xtwitches	12011	88.5246	All	p5_191205_191210_1_191210_a000	191205_191210_1	P5
1357	Xtwitches	12104	80.3922	All	p5_191205_191210_1_191210_a000	191205_191210_1	P5
1358	Xtwitches	12255	76.9231	All	p5_191205_191210_1_191210_a000	191205_191210_1	P5
1359	Xtwitches	12328	72.093	All	p5_191205_191210_1_191210_a000	191205_191210_1	P5
1360	Xtwitches	12421	92.7835	All	p5_191205_191210_1_191210_a000	191205_191210_1	P5
1361	Xcomplexe_movements	1221	55.8824	All	p5_191205_191210_1_191210_a001	191205_191210_1	P5
1362	Xcomplexe_movements	3151	68.1818	All	p5_191205_191210_1_191210_a001	191205_191210_1	P5
1363	Xcomplexe_movements	3203	48.1481	All	p5_191205_191210_1_191210_a001	191205_191210_1	P5
1364	Xcomplexe_movements	9046	52.6316	All	p5_191205_191210_1_191210_a001	191205_191210_1	P5
1365	Xcomplexe_movements	9085	50	All	p5_191205_191210_1_191210_a001	191205_191210_1	P5
1366	Xcomplexe_movements	9767	91.3043	All	p5_191205_191210_1_191210_a001	191205_191210_1	P5
1367	Xcomplexe_movements	9868	90.9091	All	p5_191205_191210_1_191210_a001	191205_191210_1	P5
1368	Xstartles	418	56.25	All	p5_191205_191210_1_191210_a001	191205_191210_1	P5
1369	Xstartles	456	71.4286	All	p5_191205_191210_1_191210_a001	191205_191210_1	P5
1370	Xstartles	695	46.1538	All	p5_191205_191210_1_191210_a001	191205_191210_1	P5
1371	Xstartles	1088	70	All	p5_191205_191210_1_191210_a001	191205_191210_1	P5
1372	Xstartles	1299	81.8182	All	p5_191205_191210_1_191210_a001	191205_191210_1	P5
1373	Xstartles	2165	73.0769	All	p5_191205_191210_1_191210_a001	191205_191210_1	P5
1374	Xstartles	2187	59.0909	All	p5_191205_191210_1_191210_a001	191205_191210_1	P5
1375	Xstartles	2237	95	All	p5_191205_191210_1_191210_a001	191205_191210_1	P5
1376	Xstartles	2326	87.0968	All	p5_191205_191210_1_191210_a001	191205_191210_1	P5
1377	Xstartles	2380	92	All	p5_191205_191210_1_191210_a001	191205_191210_1	P5
1378	Xstartles	3103	53.3333	All	p5_191205_191210_1_191210_a001	191205_191210_1	P5
1379	Xstartles	3145	75	All	p5_191205_191210_1_191210_a001	191205_191210_1	P5
1380	Xstartles	3755	61.9048	All	p5_191205_191210_1_191210_a001	191205_191210_1	P5
1381	Xstartles	4068	85.7143	All	p5_191205_191210_1_191210_a001	191205_191210_1	P5
1382	Xstartles	4203	78.5714	All	p5_191205_191210_1_191210_a001	191205_191210_1	P5
1383	Xstartles	4532	100	All	p5_191205_191210_1_191210_a001	191205_191210_1	P5
1384	Xstartles	4542	35	All	p5_191205_191210_1_191210_a001	191205_191210_1	P5
1385	Xstartles	4585	83.3333	All	p5_191205_191210_1_191210_a001	191205_191210_1	P5
1386	Xstartles	4767	87.5	All	p5_191205_191210_1_191210_a001	191205_191210_1	P5
1387	Xstartles	5168	92.3077	All	p5_191205_191210_1_191210_a001	191205_191210_1	P5
1388	Xstartles	5180	50	All	p5_191205_191210_1_191210_a001	191205_191210_1	P5
1389	Xstartles	5187	50	All	p5_191205_191210_1_191210_a001	191205_191210_1	P5
1390	Xstartles	5204	47.3684	All	p5_191205_191210_1_191210_a001	191205_191210_1	P5
1391	Xstartles	5363	100	All	p5_191205_191210_1_191210_a001	191205_191210_1	P5
1392	Xstartles	5664	88.8889	All	p5_191205_191210_1_191210_a001	191205_191210_1	P5
1393	Xstartles	5802	58.8235	All	p5_191205_191210_1_191210_a001	191205_191210_1	P5
1394	Xstartles	6113	76.4706	All	p5_191205_191210_1_191210_a001	191205_191210_1	P5
1395	Xstartles	6142	50	All	p5_191205_191210_1_191210_a001	191205_191210_1	P5
1396	Xstartles	6533	100	All	p5_191205_191210_1_191210_a001	191205_191210_1	P5
1397	Xstartles	6749	50	All	p5_191205_191210_1_191210_a001	191205_191210_1	P5
1398	Xstartles	6937	48.9362	All	p5_191205_191210_1_191210_a001	191205_191210_1	P5
1399	Xstartles	7365	88.2353	All	p5_191205_191210_1_191210_a001	191205_191210_1	P5
1400	Xstartles	7621	83.3333	All	p5_191205_191210_1_191210_a001	191205_191210_1	P5
1401	Xstartles	7731	81.8182	All	p5_191205_191210_1_191210_a001	191205_191210_1	P5
1402	Xstartles	8010	70	All	p5_191205_191210_1_191210_a001	191205_191210_1	P5
1403	Xstartles	8400	88.8889	All	p5_191205_191210_1_191210_a001	191205_191210_1	P5
1404	Xstartles	8479	100	All	p5_191205_191210_1_191210_a001	191205_191210_1	P5
1405	Xstartles	9116	62.5	All	p5_191205_191210_1_191210_a001	191205_191210_1	P5
1406	Xstartles	9188	71.4286	All	p5_191205_191210_1_191210_a001	191205_191210_1	P5
1407	Xstartles	9318	94.7368	All	p5_191205_191210_1_191210_a001	191205_191210_1	P5
1408	Xstartles	9421	60	All	p5_191205_191210_1_191210_a001	191205_191210_1	P5
1409	Xstartles	9619	76.9231	All	p5_191205_191210_1_191210_a001	191205_191210_1	P5
1410	Xstartles	9735	58.0645	All	p5_191205_191210_1_191210_a001	191205_191210_1	P5
1411	Xstartles	9942	64.7059	All	p5_191205_191210_1_191210_a001	191205_191210_1	P5
1412	Xtwitches	65	54.5455	All	p5_191205_191210_1_191210_a001	191205_191210_1	P5
1413	Xtwitches	162	100	All	p5_191205_191210_1_191210_a001	191205_191210_1	P5
1414	Xtwitches	214	52	All	p5_191205_191210_1_191210_a001	191205_191210_1	P5
1415	Xtwitches	215	50	All	p5_191205_191210_1_191210_a001	191205_191210_1	P5
1416	Xtwitches	337	36.1111	All	p5_191205_191210_1_191210_a001	191205_191210_1	P5
1417	Xtwitches	404	78.5714	All	p5_191205_191210_1_191210_a001	191205_191210_1	P5
1418	Xtwitches	690	64.2857	All	p5_191205_191210_1_191210_a001	191205_191210_1	P5
1419	Xtwitches	702	23.0769	All	p5_191205_191210_1_191210_a001	191205_191210_1	P5
1420	Xtwitches	898	76.4706	All	p5_191205_191210_1_191210_a001	191205_191210_1	P5
1421	Xtwitches	1000	84.2105	All	p5_191205_191210_1_191210_a001	191205_191210_1	P5
1422	Xtwitches	1114	42.8571	All	p5_191205_191210_1_191210_a001	191205_191210_1	P5
1423	Xtwitches	1189	100	All	p5_191205_191210_1_191210_a001	191205_191210_1	P5
1424	Xtwitches	1576	58.0645	All	p5_191205_191210_1_191210_a001	191205_191210_1	P5
1425	Xtwitches	1687	92.8571	All	p5_191205_191210_1_191210_a001	191205_191210_1	P5
1426	Xtwitches	1934	62.7907	All	p5_191205_191210_1_191210_a001	191205_191210_1	P5
1427	Xtwitches	2040	100	All	p5_191205_191210_1_191210_a001	191205_191210_1	P5
1428	Xtwitches	2116	100	All	p5_191205_191210_1_191210_a001	191205_191210_1	P5
1429	Xtwitches	2334	40.625	All	p5_191205_191210_1_191210_a001	191205_191210_1	P5
1430	Xtwitches	2558	78.7879	All	p5_191205_191210_1_191210_a001	191205_191210_1	P5
1431	Xtwitches	2607	80.9524	All	p5_191205_191210_1_191210_a001	191205_191210_1	P5
1432	Xtwitches	2698	76.1905	All	p5_191205_191210_1_191210_a001	191205_191210_1	P5
1433	Xtwitches	2764	86.6667	All	p5_191205_191210_1_191210_a001	191205_191210_1	P5
1434	Xtwitches	2793	40	All	p5_191205_191210_1_191210_a001	191205_191210_1	P5
1435	Xtwitches	2830	55.1724	All	p5_191205_191210_1_191210_a001	191205_191210_1	P5
1436	Xtwitches	2951	78.9474	All	p5_191205_191210_1_191210_a001	191205_191210_1	P5
1437	Xtwitches	3075	74.2857	All	p5_191205_191210_1_191210_a001	191205_191210_1	P5
1438	Xtwitches	3332	52.7778	All	p5_191205_191210_1_191210_a001	191205_191210_1	P5
1439	Xtwitches	3421	66.6667	All	p5_191205_191210_1_191210_a001	191205_191210_1	P5
1440	Xtwitches	3483	100	All	p5_191205_191210_1_191210_a001	191205_191210_1	P5
1441	Xtwitches	3517	90	All	p5_191205_191210_1_191210_a001	191205_191210_1	P5
1442	Xtwitches	3719	66.6667	All	p5_191205_191210_1_191210_a001	191205_191210_1	P5
1443	Xtwitches	3741	48.1481	All	p5_191205_191210_1_191210_a001	191205_191210_1	P5
1444	Xtwitches	3854	34.7826	All	p5_191205_191210_1_191210_a001	191205_191210_1	P5
1445	Xtwitches	3946	90	All	p5_191205_191210_1_191210_a001	191205_191210_1	P5
1446	Xtwitches	3974	60	All	p5_191205_191210_1_191210_a001	191205_191210_1	P5
1447	Xtwitches	4029	63.1579	All	p5_191205_191210_1_191210_a001	191205_191210_1	P5
1448	Xtwitches	4147	35	All	p5_191205_191210_1_191210_a001	191205_191210_1	P5
1449	Xtwitches	4156	46.1538	All	p5_191205_191210_1_191210_a001	191205_191210_1	P5
1450	Xtwitches	4281	92.3077	All	p5_191205_191210_1_191210_a001	191205_191210_1	P5
1451	Xtwitches	4306	72.7273	All	p5_191205_191210_1_191210_a001	191205_191210_1	P5
1452	Xtwitches	4404	67.7419	All	p5_191205_191210_1_191210_a001	191205_191210_1	P5
1453	Xtwitches	4447	68.75	All	p5_191205_191210_1_191210_a001	191205_191210_1	P5
1454	Xtwitches	4492	92.3077	All	p5_191205_191210_1_191210_a001	191205_191210_1	P5
1455	Xtwitches	4554	19.0476	All	p5_191205_191210_1_191210_a001	191205_191210_1	P5
1456	Xtwitches	4684	72.2222	All	p5_191205_191210_1_191210_a001	191205_191210_1	P5
1457	Xtwitches	4704	28	All	p5_191205_191210_1_191210_a001	191205_191210_1	P5
1458	Xtwitches	4726	61.9048	All	p5_191205_191210_1_191210_a001	191205_191210_1	P5
1459	Xtwitches	4736	57.8947	All	p5_191205_191210_1_191210_a001	191205_191210_1	P5
1460	Xtwitches	4887	92.8571	All	p5_191205_191210_1_191210_a001	191205_191210_1	P5
1461	Xtwitches	4927	78.125	All	p5_191205_191210_1_191210_a001	191205_191210_1	P5
1462	Xtwitches	5098	83.3333	All	p5_191205_191210_1_191210_a001	191205_191210_1	P5
1463	Xtwitches	5107	33.3333	All	p5_191205_191210_1_191210_a001	191205_191210_1	P5
1464	Xtwitches	5300	82.3529	All	p5_191205_191210_1_191210_a001	191205_191210_1	P5
1465	Xtwitches	5447	95	All	p5_191205_191210_1_191210_a001	191205_191210_1	P5
1466	Xtwitches	5540	85.7143	All	p5_191205_191210_1_191210_a001	191205_191210_1	P5
1467	Xtwitches	5585	56.25	All	p5_191205_191210_1_191210_a001	191205_191210_1	P5
1468	Xtwitches	5705	75	All	p5_191205_191210_1_191210_a001	191205_191210_1	P5
1469	Xtwitches	5715	86.6667	All	p5_191205_191210_1_191210_a001	191205_191210_1	P5
1470	Xtwitches	5738	45.4545	All	p5_191205_191210_1_191210_a001	191205_191210_1	P5
1471	Xtwitches	5759	90.4762	All	p5_191205_191210_1_191210_a001	191205_191210_1	P5
1472	Xtwitches	5763	78.9474	All	p5_191205_191210_1_191210_a001	191205_191210_1	P5
1473	Xtwitches	5769	38.0952	All	p5_191205_191210_1_191210_a001	191205_191210_1	P5
1474	Xtwitches	5917	50	All	p5_191205_191210_1_191210_a001	191205_191210_1	P5
1475	Xtwitches	5954	57.1429	All	p5_191205_191210_1_191210_a001	191205_191210_1	P5
1476	Xtwitches	6082	82.6087	All	p5_191205_191210_1_191210_a001	191205_191210_1	P5
1477	Xtwitches	6282	78.5714	All	p5_191205_191210_1_191210_a001	191205_191210_1	P5
1478	Xtwitches	6296	65.2174	All	p5_191205_191210_1_191210_a001	191205_191210_1	P5
1479	Xtwitches	6479	53.1915	All	p5_191205_191210_1_191210_a001	191205_191210_1	P5
1480	Xtwitches	6625	85	All	p5_191205_191210_1_191210_a001	191205_191210_1	P5
1481	Xtwitches	6657	42.8571	All	p5_191205_191210_1_191210_a001	191205_191210_1	P5
1482	Xtwitches	6836	84.2105	All	p5_191205_191210_1_191210_a001	191205_191210_1	P5
1483	Xtwitches	7014	66.6667	All	p5_191205_191210_1_191210_a001	191205_191210_1	P5
1484	Xtwitches	7096	82.6087	All	p5_191205_191210_1_191210_a001	191205_191210_1	P5
1485	Xtwitches	7196	75.8621	All	p5_191205_191210_1_191210_a001	191205_191210_1	P5
1486	Xtwitches	7283	83.3333	All	p5_191205_191210_1_191210_a001	191205_191210_1	P5
1487	Xtwitches	7458	87.5	All	p5_191205_191210_1_191210_a001	191205_191210_1	P5
1488	Xtwitches	7465	53.125	All	p5_191205_191210_1_191210_a001	191205_191210_1	P5
1489	Xtwitches	7526	42.8571	All	p5_191205_191210_1_191210_a001	191205_191210_1	P5
1490	Xtwitches	7555	64.2857	All	p5_191205_191210_1_191210_a001	191205_191210_1	P5
1491	Xtwitches	7685	81.25	All	p5_191205_191210_1_191210_a001	191205_191210_1	P5
1492	Xtwitches	7814	85.7143	All	p5_191205_191210_1_191210_a001	191205_191210_1	P5
1493	Xtwitches	7848	50	All	p5_191205_191210_1_191210_a001	191205_191210_1	P5
1494	Xtwitches	7867	76	All	p5_191205_191210_1_191210_a001	191205_191210_1	P5
1495	Xtwitches	7907	62.963	All	p5_191205_191210_1_191210_a001	191205_191210_1	P5
1496	Xtwitches	7933	56	All	p5_191205_191210_1_191210_a001	191205_191210_1	P5
1497	Xtwitches	7940	27.2727	All	p5_191205_191210_1_191210_a001	191205_191210_1	P5
1498	Xtwitches	8115	69.697	All	p5_191205_191210_1_191210_a001	191205_191210_1	P5
1499	Xtwitches	8233	62.8571	All	p5_191205_191210_1_191210_a001	191205_191210_1	P5
1500	Xtwitches	8241	52.7778	All	p5_191205_191210_1_191210_a001	191205_191210_1	P5
1501	Xtwitches	8247	30.5556	All	p5_191205_191210_1_191210_a001	191205_191210_1	P5
1502	Xtwitches	8336	80	All	p5_191205_191210_1_191210_a001	191205_191210_1	P5
1503	Xtwitches	8564	91.6667	All	p5_191205_191210_1_191210_a001	191205_191210_1	P5
1504	Xtwitches	8627	60	All	p5_191205_191210_1_191210_a001	191205_191210_1	P5
1505	Xtwitches	8715	85.7143	All	p5_191205_191210_1_191210_a001	191205_191210_1	P5
1506	Xtwitches	8803	73.3333	All	p5_191205_191210_1_191210_a001	191205_191210_1	P5
1507	Xtwitches	8836	51.4286	All	p5_191205_191210_1_191210_a001	191205_191210_1	P5
1508	Xtwitches	8938	90	All	p5_191205_191210_1_191210_a001	191205_191210_1	P5
1509	Xtwitches	9019	75	All	p5_191205_191210_1_191210_a001	191205_191210_1	P5
1510	Xtwitches	9038	53.8462	All	p5_191205_191210_1_191210_a001	191205_191210_1	P5
1511	Xtwitches	9251	54.5455	All	p5_191205_191210_1_191210_a001	191205_191210_1	P5
1512	Xtwitches	9509	21.7391	All	p5_191205_191210_1_191210_a001	191205_191210_1	P5
1513	Xtwitches	9563	90	All	p5_191205_191210_1_191210_a001	191205_191210_1	P5
1514	Xtwitches	9725	68	All	p5_191205_191210_1_191210_a001	191205_191210_1	P5
1515	complex_mvt	509	84.2105	All	p5_200306_200311_200311_a000	200306_200311	P5
1516	complex_mvt	4112	36.3014	All	p5_200306_200311_200311_a000	200306_200311	P5
1517	complex_mvt	4349	75.1825	All	p5_200306_200311_200311_a000	200306_200311	P5
1518	complex_mvt	4398	77.1084	All	p5_200306_200311_200311_a000	200306_200311	P5
1519	complex_mvt	6366	8.33333	All	p5_200306_200311_200311_a000	200306_200311	P5
1520	complex_mvt	6402	84.2105	All	p5_200306_200311_200311_a000	200306_200311	P5
1521	complex_mvt	6615	35.0515	All	p5_200306_200311_200311_a000	200306_200311	P5
1522	complex_mvt	8364	39.8601	All	p5_200306_200311_200311_a000	200306_200311	P5
1523	complex_mvt	8439	78.6667	All	p5_200306_200311_200311_a000	200306_200311	P5
1524	complex_mvt	8614	37.1134	All	p5_200306_200311_200311_a000	200306_200311	P5
1525	complex_mvt	9110	40	All	p5_200306_200311_200311_a000	200306_200311	P5
1526	complex_mvt	10040	60	All	p5_200306_200311_200311_a000	200306_200311	P5
1527	complex_mvt	10072	86.5672	All	p5_200306_200311_200311_a000	200306_200311	P5
1528	complex_mvt	10422	52.9412	All	p5_200306_200311_200311_a000	200306_200311	P5
1529	complex_mvt	10455	82.4561	All	p5_200306_200311_200311_a000	200306_200311	P5
1530	complex_mvt	11492	73.2394	All	p5_200306_200311_200311_a000	200306_200311	P5
1531	complex_mvt	12002	100	All	p5_200306_200311_200311_a000	200306_200311	P5
1532	complex_mvt	12202	26.2712	All	p5_200306_200311_200311_a000	200306_200311	P5
1533	mvt_forelimb_left	1120	20	All	p5_200306_200311_200311_a000	200306_200311	P5
1534	mvt_forelimb_left	1134	75	All	p5_200306_200311_200311_a000	200306_200311	P5
1535	mvt_forelimb_left	1162	100	All	p5_200306_200311_200311_a000	200306_200311	P5
1536	mvt_forelimb_left	1725	11.3924	All	p5_200306_200311_200311_a000	200306_200311	P5
1537	mvt_forelimb_left	1961	100	All	p5_200306_200311_200311_a000	200306_200311	P5
1538	mvt_forelimb_left	2849	41.6667	All	p5_200306_200311_200311_a000	200306_200311	P5
1539	mvt_forelimb_left	2855	18.9189	All	p5_200306_200311_200311_a000	200306_200311	P5
1540	mvt_forelimb_left	3123	80	All	p5_200306_200311_200311_a000	200306_200311	P5
1541	mvt_forelimb_left	3141	93.5484	All	p5_200306_200311_200311_a000	200306_200311	P5
1542	mvt_forelimb_left	3153	83.8983	All	p5_200306_200311_200311_a000	200306_200311	P5
1543	mvt_forelimb_left	3696	74.7368	All	p5_200306_200311_200311_a000	200306_200311	P5
1544	mvt_forelimb_left	4713	14.0845	All	p5_200306_200311_200311_a000	200306_200311	P5
1545	mvt_forelimb_left	4978	29.4479	All	p5_200306_200311_200311_a000	200306_200311	P5
1546	startle	167	45.9677	All	p5_200306_200311_200311_a000	200306_200311	P5
1547	startle	463	59.375	All	p5_200306_200311_200311_a000	200306_200311	P5
1548	startle	1245	56.6434	All	p5_200306_200311_200311_a000	200306_200311	P5
1549	startle	2095	95.8333	All	p5_200306_200311_200311_a000	200306_200311	P5
1550	startle	2459	77.7778	All	p5_200306_200311_200311_a000	200306_200311	P5
1551	startle	2844	76.3158	All	p5_200306_200311_200311_a000	200306_200311	P5
1552	startle	2898	88.5246	All	p5_200306_200311_200311_a000	200306_200311	P5
1553	startle	3455	74.6269	All	p5_200306_200311_200311_a000	200306_200311	P5
1554	startle	3495	94.4444	All	p5_200306_200311_200311_a000	200306_200311	P5
1555	startle	3585	47.1698	All	p5_200306_200311_200311_a000	200306_200311	P5
1556	startle	4252	87.7551	All	p5_200306_200311_200311_a000	200306_200311	P5
1557	startle	4343	97.5309	All	p5_200306_200311_200311_a000	200306_200311	P5
1558	startle	4550	81.9672	All	p5_200306_200311_200311_a000	200306_200311	P5
1559	startle	4799	96.0784	All	p5_200306_200311_200311_a000	200306_200311	P5
1560	startle	4972	50	All	p5_200306_200311_200311_a000	200306_200311	P5
1561	startle	5142	90.9091	All	p5_200306_200311_200311_a000	200306_200311	P5
1562	startle	5203	58.4906	All	p5_200306_200311_200311_a000	200306_200311	P5
1563	startle	5448	90.5405	All	p5_200306_200311_200311_a000	200306_200311	P5
1564	startle	5695	77.5	All	p5_200306_200311_200311_a000	200306_200311	P5
1565	startle	5814	67.0455	All	p5_200306_200311_200311_a000	200306_200311	P5
1566	startle	6035	90.4762	All	p5_200306_200311_200311_a000	200306_200311	P5
1567	startle	6334	77.0115	All	p5_200306_200311_200311_a000	200306_200311	P5
1568	startle	6476	95	All	p5_200306_200311_200311_a000	200306_200311	P5
1569	startle	7580	81.1881	All	p5_200306_200311_200311_a000	200306_200311	P5
1570	startle	7606	26.2295	All	p5_200306_200311_200311_a000	200306_200311	P5
1571	startle	7715	95.082	All	p5_200306_200311_200311_a000	200306_200311	P5
1572	startle	7815	96.9697	All	p5_200306_200311_200311_a000	200306_200311	P5
1573	startle	8115	80.8219	All	p5_200306_200311_200311_a000	200306_200311	P5
1574	startle	8194	73.4375	All	p5_200306_200311_200311_a000	200306_200311	P5
1575	startle	8346	57.9268	All	p5_200306_200311_200311_a000	200306_200311	P5
1576	startle	8513	63.0769	All	p5_200306_200311_200311_a000	200306_200311	P5
1577	startle	8866	95.3125	All	p5_200306_200311_200311_a000	200306_200311	P5
1578	startle	8927	89.2857	All	p5_200306_200311_200311_a000	200306_200311	P5
1579	startle	8989	100	All	p5_200306_200311_200311_a000	200306_200311	P5
1580	startle	9022	73.0769	All	p5_200306_200311_200311_a000	200306_200311	P5
1581	startle	9104	61.6541	All	p5_200306_200311_200311_a000	200306_200311	P5
1582	startle	9253	54.3689	All	p5_200306_200311_200311_a000	200306_200311	P5
1583	startle	9306	52.2727	All	p5_200306_200311_200311_a000	200306_200311	P5
1584	startle	9395	61.165	All	p5_200306_200311_200311_a000	200306_200311	P5
1585	startle	9484	92.5926	All	p5_200306_200311_200311_a000	200306_200311	P5
1586	startle	9575	87.0588	All	p5_200306_200311_200311_a000	200306_200311	P5
1587	startle	9921	91.8919	All	p5_200306_200311_200311_a000	200306_200311	P5
1588	startle	10329	82.6087	All	p5_200306_200311_200311_a000	200306_200311	P5
1589	startle	10952	65.4206	All	p5_200306_200311_200311_a000	200306_200311	P5
1590	startle	11042	80	All	p5_200306_200311_200311_a000	200306_200311	P5
1591	startle	11205	50	All	p5_200306_200311_200311_a000	200306_200311	P5
1592	startle	11376	78.9474	All	p5_200306_200311_200311_a000	200306_200311	P5
1593	startle	11487	92.8571	All	p5_200306_200311_200311_a000	200306_200311	P5
1594	startle	11717	52.6316	All	p5_200306_200311_200311_a000	200306_200311	P5
1595	startle	11790	100	All	p5_200306_200311_200311_a000	200306_200311	P5
1596	startle	11837	94.4444	All	p5_200306_200311_200311_a000	200306_200311	P5
1597	startle	12093	100	All	p5_200306_200311_200311_a000	200306_200311	P5
1598	twitch_forelimb_left	151	68.3673	All	p5_200306_200311_200311_a000	200306_200311	P5
1599	twitch_forelimb_left	177	34.2105	All	p5_200306_200311_200311_a000	200306_200311	P5
1600	twitch_forelimb_left	182	29.4118	All	p5_200306_200311_200311_a000	200306_200311	P5
1601	twitch_forelimb_left	188	36.3636	All	p5_200306_200311_200311_a000	200306_200311	P5
1602	twitch_forelimb_left	428	69.6296	All	p5_200306_200311_200311_a000	200306_200311	P5
1603	twitch_forelimb_left	432	61.9403	All	p5_200306_200311_200311_a000	200306_200311	P5
1604	twitch_forelimb_left	436	45.3237	All	p5_200306_200311_200311_a000	200306_200311	P5
1605	twitch_forelimb_left	441	32.2835	All	p5_200306_200311_200311_a000	200306_200311	P5
1606	twitch_forelimb_left	498	73.3333	All	p5_200306_200311_200311_a000	200306_200311	P5
1607	twitch_forelimb_left	748	49.2063	All	p5_200306_200311_200311_a000	200306_200311	P5
1608	twitch_forelimb_left	751	40	All	p5_200306_200311_200311_a000	200306_200311	P5
1609	twitch_forelimb_left	778	38.2353	All	p5_200306_200311_200311_a000	200306_200311	P5
1610	twitch_forelimb_left	883	87.5	All	p5_200306_200311_200311_a000	200306_200311	P5
1611	twitch_forelimb_left	1064	72.8571	All	p5_200306_200311_200311_a000	200306_200311	P5
1612	twitch_forelimb_left	1078	32.8358	All	p5_200306_200311_200311_a000	200306_200311	P5
1613	twitch_forelimb_left	1084	18.9655	All	p5_200306_200311_200311_a000	200306_200311	P5
1614	twitch_forelimb_left	1140	50	All	p5_200306_200311_200311_a000	200306_200311	P5
1615	twitch_forelimb_left	1243	63.7681	All	p5_200306_200311_200311_a000	200306_200311	P5
1616	twitch_forelimb_left	1248	50.3401	All	p5_200306_200311_200311_a000	200306_200311	P5
1617	twitch_forelimb_left	1252	35.5072	All	p5_200306_200311_200311_a000	200306_200311	P5
1618	twitch_forelimb_left	1280	6.25	All	p5_200306_200311_200311_a000	200306_200311	P5
1619	twitch_forelimb_left	1458	58.4416	All	p5_200306_200311_200311_a000	200306_200311	P5
1620	twitch_forelimb_left	1497	49.4318	All	p5_200306_200311_200311_a000	200306_200311	P5
1621	twitch_forelimb_left	1508	19.2308	All	p5_200306_200311_200311_a000	200306_200311	P5
1622	twitch_forelimb_left	1712	80.4348	All	p5_200306_200311_200311_a000	200306_200311	P5
1623	twitch_forelimb_left	1825	60.2151	All	p5_200306_200311_200311_a000	200306_200311	P5
1624	twitch_forelimb_left	1891	38.7931	All	p5_200306_200311_200311_a000	200306_200311	P5
1625	twitch_forelimb_left	2041	62.0482	All	p5_200306_200311_200311_a000	200306_200311	P5
1626	twitch_forelimb_left	2052	34.6154	All	p5_200306_200311_200311_a000	200306_200311	P5
1627	twitch_forelimb_left	2302	68.4211	All	p5_200306_200311_200311_a000	200306_200311	P5
1628	twitch_forelimb_left	2638	65.7534	All	p5_200306_200311_200311_a000	200306_200311	P5
1629	twitch_forelimb_left	2640	57.377	All	p5_200306_200311_200311_a000	200306_200311	P5
1630	twitch_forelimb_left	2735	86.9565	All	p5_200306_200311_200311_a000	200306_200311	P5
1631	twitch_forelimb_left	2871	36.3636	All	p5_200306_200311_200311_a000	200306_200311	P5
1632	twitch_forelimb_left	3040	83.0508	All	p5_200306_200311_200311_a000	200306_200311	P5
1633	twitch_forelimb_left	3095	48.3871	All	p5_200306_200311_200311_a000	200306_200311	P5
1634	twitch_forelimb_left	3175	52.8302	All	p5_200306_200311_200311_a000	200306_200311	P5
1635	twitch_forelimb_left	3205	51.0067	All	p5_200306_200311_200311_a000	200306_200311	P5
1636	twitch_forelimb_left	3209	31.5436	All	p5_200306_200311_200311_a000	200306_200311	P5
1637	twitch_forelimb_left	3366	34.7222	All	p5_200306_200311_200311_a000	200306_200311	P5
1638	twitch_forelimb_left	3422	80.3279	All	p5_200306_200311_200311_a000	200306_200311	P5
1639	twitch_forelimb_left	3605	24.4444	All	p5_200306_200311_200311_a000	200306_200311	P5
1640	twitch_forelimb_left	3701	75.6098	All	p5_200306_200311_200311_a000	200306_200311	P5
1641	twitch_forelimb_left	3789	71.0526	All	p5_200306_200311_200311_a000	200306_200311	P5
1642	twitch_forelimb_left	3880	68.9394	All	p5_200306_200311_200311_a000	200306_200311	P5
1643	twitch_forelimb_left	3923	90	All	p5_200306_200311_200311_a000	200306_200311	P5
1644	twitch_forelimb_left	3984	82.5	All	p5_200306_200311_200311_a000	200306_200311	P5
1645	twitch_forelimb_left	4095	57.764	All	p5_200306_200311_200311_a000	200306_200311	P5
1646	twitch_forelimb_left	4105	46.875	All	p5_200306_200311_200311_a000	200306_200311	P5
1647	twitch_forelimb_left	4108	42.1384	All	p5_200306_200311_200311_a000	200306_200311	P5
1648	twitch_forelimb_left	4702	55.814	All	p5_200306_200311_200311_a000	200306_200311	P5
1649	twitch_forelimb_left	5018	67.9688	All	p5_200306_200311_200311_a000	200306_200311	P5
1650	twitch_forelimb_left	5306	62.5	All	p5_200306_200311_200311_a000	200306_200311	P5
1651	twitch_forelimb_left	5343	77.451	All	p5_200306_200311_200311_a000	200306_200311	P5
1652	twitch_forelimb_left	5565	52.1127	All	p5_200306_200311_200311_a000	200306_200311	P5
1653	twitch_forelimb_left	5603	71.1712	All	p5_200306_200311_200311_a000	200306_200311	P5
1654	twitch_forelimb_left	5619	63.0058	All	p5_200306_200311_200311_a000	200306_200311	P5
1655	twitch_forelimb_left	5912	41.3793	All	p5_200306_200311_200311_a000	200306_200311	P5
1656	twitch_forelimb_left	5919	21.6418	All	p5_200306_200311_200311_a000	200306_200311	P5
1657	twitch_forelimb_left	5992	30.4878	All	p5_200306_200311_200311_a000	200306_200311	P5
1658	twitch_forelimb_left	6309	79.7101	All	p5_200306_200311_200311_a000	200306_200311	P5
1659	twitch_forelimb_left	6350	35.8696	All	p5_200306_200311_200311_a000	200306_200311	P5
1660	twitch_forelimb_left	6579	64.0244	All	p5_200306_200311_200311_a000	200306_200311	P5
1661	twitch_forelimb_left	6609	54.0984	All	p5_200306_200311_200311_a000	200306_200311	P5
1662	twitch_forelimb_left	7010	59.1549	All	p5_200306_200311_200311_a000	200306_200311	P5
1663	twitch_forelimb_left	7072	25.7143	All	p5_200306_200311_200311_a000	200306_200311	P5
1664	twitch_forelimb_left	7058	89.8305	All	p5_200306_200311_200311_a000	200306_200311	P5
1665	twitch_forelimb_left	7177	64.8148	All	p5_200306_200311_200311_a000	200306_200311	P5
1666	twitch_forelimb_left	7247	28	All	p5_200306_200311_200311_a000	200306_200311	P5
1667	twitch_forelimb_left	7425	27.2727	All	p5_200306_200311_200311_a000	200306_200311	P5
1668	twitch_forelimb_left	7925	49.4382	All	p5_200306_200311_200311_a000	200306_200311	P5
1669	twitch_forelimb_left	9697	59.3023	All	p5_200306_200311_200311_a000	200306_200311	P5
1670	twitch_forelimb_left	9726	15.1515	All	p5_200306_200311_200311_a000	200306_200311	P5
1671	twitch_forelimb_left	9834	54.321	All	p5_200306_200311_200311_a000	200306_200311	P5
1672	twitch_forelimb_left	10253	44.4444	All	p5_200306_200311_200311_a000	200306_200311	P5
1673	twitch_forelimb_left	10710	40.708	All	p5_200306_200311_200311_a000	200306_200311	P5
1674	twitch_forelimb_left	10734	47.2727	All	p5_200306_200311_200311_a000	200306_200311	P5
1675	twitch_forelimb_left	10887	66.0377	All	p5_200306_200311_200311_a000	200306_200311	P5
1676	twitch_forelimb_left	10974	5	All	p5_200306_200311_200311_a000	200306_200311	P5
1677	twitch_forelimb_left	11124	65.7534	All	p5_200306_200311_200311_a000	200306_200311	P5
1678	twitch_forelimb_left	11298	82.4176	All	p5_200306_200311_200311_a000	200306_200311	P5
1679	twitch_forelimb_left	11451	78.9474	All	p5_200306_200311_200311_a000	200306_200311	P5
1680	twitch_forelimb_right	430	71.8519	All	p5_200306_200311_200311_a000	200306_200311	P5
1681	twitch_forelimb_right	433	57.8571	All	p5_200306_200311_200311_a000	200306_200311	P5
1682	twitch_forelimb_right	442	28.3333	All	p5_200306_200311_200311_a000	200306_200311	P5
1683	twitch_forelimb_right	748	49.2063	All	p5_200306_200311_200311_a000	200306_200311	P5
1684	twitch_forelimb_right	758	24.7619	All	p5_200306_200311_200311_a000	200306_200311	P5
1685	twitch_forelimb_right	1497	49.4318	All	p5_200306_200311_200311_a000	200306_200311	P5
1686	twitch_forelimb_right	1712	80.4348	All	p5_200306_200311_200311_a000	200306_200311	P5
1687	twitch_forelimb_right	2040	64.4172	All	p5_200306_200311_200311_a000	200306_200311	P5
1688	twitch_forelimb_right	2735	86.8132	All	p5_200306_200311_200311_a000	200306_200311	P5
1689	twitch_forelimb_right	2736	81.3187	All	p5_200306_200311_200311_a000	200306_200311	P5
1690	twitch_forelimb_right	3204	54.3046	All	p5_200306_200311_200311_a000	200306_200311	P5
1691	twitch_forelimb_right	3371	24.0602	All	p5_200306_200311_200311_a000	200306_200311	P5
1692	twitch_forelimb_right	3790	63.1579	All	p5_200306_200311_200311_a000	200306_200311	P5
1693	twitch_forelimb_right	3924	90	All	p5_200306_200311_200311_a000	200306_200311	P5
1694	twitch_forelimb_right	4108	42.1384	All	p5_200306_200311_200311_a000	200306_200311	P5
1695	twitch_forelimb_right	5603	71.1712	All	p5_200306_200311_200311_a000	200306_200311	P5
1696	twitch_forelimb_right	5622	46.5839	All	p5_200306_200311_200311_a000	200306_200311	P5
1697	twitch_forelimb_right	5912	41.3793	All	p5_200306_200311_200311_a000	200306_200311	P5
1698	twitch_forelimb_right	6139	71.5152	All	p5_200306_200311_200311_a000	200306_200311	P5
1699	twitch_forelimb_right	6264	65.2482	All	p5_200306_200311_200311_a000	200306_200311	P5
1700	twitch_forelimb_right	6609	54.0984	All	p5_200306_200311_200311_a000	200306_200311	P5
1701	twitch_forelimb_right	7010	59.1549	All	p5_200306_200311_200311_a000	200306_200311	P5
1702	twitch_forelimb_right	7059	85.2459	All	p5_200306_200311_200311_a000	200306_200311	P5
1703	twitch_forelimb_right	7178	61.9469	All	p5_200306_200311_200311_a000	200306_200311	P5
1704	twitch_forelimb_right	7371	90.4348	All	p5_200306_200311_200311_a000	200306_200311	P5
1705	twitch_forelimb_right	7982	80.1527	All	p5_200306_200311_200311_a000	200306_200311	P5
1706	twitch_forelimb_right	9697	59.3023	All	p5_200306_200311_200311_a000	200306_200311	P5
1707	twitch_forelimb_right	9725	16.6667	All	p5_200306_200311_200311_a000	200306_200311	P5
1708	twitch_forelimb_right	10254	38.7097	All	p5_200306_200311_200311_a000	200306_200311	P5
1709	twitch_forelimb_right	10706	46.7213	All	p5_200306_200311_200311_a000	200306_200311	P5
1710	twitch_forelimb_right	10974	5	All	p5_200306_200311_200311_a000	200306_200311	P5
1711	twitch_forelimb_right	11124	65.7534	All	p5_200306_200311_200311_a000	200306_200311	P5
1712	twitch_forelimb_right	11298	82.4176	All	p5_200306_200311_200311_a000	200306_200311	P5
1713	twitch_hindlimb_left	40	50	All	p5_200306_200311_200311_a000	200306_200311	P5
1714	twitch_hindlimb_left	181	33.3333	All	p5_200306_200311_200311_a000	200306_200311	P5
1715	twitch_hindlimb_left	188	36.3636	All	p5_200306_200311_200311_a000	200306_200311	P5
1716	twitch_hindlimb_left	436	46.3235	All	p5_200306_200311_200311_a000	200306_200311	P5
1717	twitch_hindlimb_left	442	28.3333	All	p5_200306_200311_200311_a000	200306_200311	P5
1718	twitch_hindlimb_left	749	47.619	All	p5_200306_200311_200311_a000	200306_200311	P5
1719	twitch_hindlimb_left	756	25	All	p5_200306_200311_200311_a000	200306_200311	P5
1720	twitch_hindlimb_left	775	33.3333	All	p5_200306_200311_200311_a000	200306_200311	P5
1721	twitch_hindlimb_left	883	87.5	All	p5_200306_200311_200311_a000	200306_200311	P5
1722	twitch_hindlimb_left	1497	48.8764	All	p5_200306_200311_200311_a000	200306_200311	P5
1723	twitch_hindlimb_left	2052	35.0318	All	p5_200306_200311_200311_a000	200306_200311	P5
1724	twitch_hindlimb_left	2301	69.9248	All	p5_200306_200311_200311_a000	200306_200311	P5
1725	twitch_hindlimb_left	2640	54.6875	All	p5_200306_200311_200311_a000	200306_200311	P5
1726	twitch_hindlimb_left	2646	17.2414	All	p5_200306_200311_200311_a000	200306_200311	P5
1727	twitch_hindlimb_left	2738	68.4211	All	p5_200306_200311_200311_a000	200306_200311	P5
1728	twitch_hindlimb_left	3042	75.4386	All	p5_200306_200311_200311_a000	200306_200311	P5
1729	twitch_hindlimb_left	3095	48.3871	All	p5_200306_200311_200311_a000	200306_200311	P5
1730	twitch_hindlimb_left	3205	51.0067	All	p5_200306_200311_200311_a000	200306_200311	P5
1731	twitch_hindlimb_left	3604	24.4444	All	p5_200306_200311_200311_a000	200306_200311	P5
1732	twitch_hindlimb_left	3699	79.5699	All	p5_200306_200311_200311_a000	200306_200311	P5
1733	twitch_hindlimb_left	3790	63.1579	All	p5_200306_200311_200311_a000	200306_200311	P5
1734	twitch_hindlimb_left	3881	62.2222	All	p5_200306_200311_200311_a000	200306_200311	P5
1735	twitch_hindlimb_left	3924	90	All	p5_200306_200311_200311_a000	200306_200311	P5
1736	twitch_hindlimb_left	3985	86.8421	All	p5_200306_200311_200311_a000	200306_200311	P5
1737	twitch_hindlimb_left	4107	42.6752	All	p5_200306_200311_200311_a000	200306_200311	P5
1738	twitch_hindlimb_left	4704	38.4615	All	p5_200306_200311_200311_a000	200306_200311	P5
1739	twitch_hindlimb_left	6131	94.0678	All	p5_200306_200311_200311_a000	200306_200311	P5
1740	twitch_hindlimb_left	6609	55.8333	All	p5_200306_200311_200311_a000	200306_200311	P5
1741	twitch_hindlimb_left	6812	19.8198	All	p5_200306_200311_200311_a000	200306_200311	P5
1742	twitch_hindlimb_left	7010	59.1549	All	p5_200306_200311_200311_a000	200306_200311	P5
1743	twitch_hindlimb_left	7177	64.8148	All	p5_200306_200311_200311_a000	200306_200311	P5
1744	twitch_hindlimb_left	7984	72.4638	All	p5_200306_200311_200311_a000	200306_200311	P5
1745	twitch_hindlimb_left	9846	20.7407	All	p5_200306_200311_200311_a000	200306_200311	P5
1746	twitch_hindlimb_left	10253	44.4444	All	p5_200306_200311_200311_a000	200306_200311	P5
1747	twitch_hindlimb_left	10974	5	All	p5_200306_200311_200311_a000	200306_200311	P5
1748	twitch_hindlimb_left	11451	78.9474	All	p5_200306_200311_200311_a000	200306_200311	P5
1749	twitch_hindlimb_right	756	25	All	p5_200306_200311_200311_a000	200306_200311	P5
1750	twitch_hindlimb_right	4108	42.1384	All	p5_200306_200311_200311_a000	200306_200311	P5
1751	twitch_hindlimb_right	6610	54.1667	All	p5_200306_200311_200311_a000	200306_200311	P5
1752	twitch_hindlimb_right	8610	51	All	p5_200306_200311_200311_a000	200306_200311	P5
1753	twitch_hindlimb_right	10252	45.9893	All	p5_200306_200311_200311_a000	200306_200311	P5
1754	twitch_hindlimb_right	11298	82.4176	All	p5_200306_200311_200311_a000	200306_200311	P5
1755	twitch_hindlimb_right	11451	78.9474	All	p5_200306_200311_200311_a000	200306_200311	P5
1756	twitch_tail	189	36.5079	All	p5_200306_200311_200311_a000	200306_200311	P5
1757	twitch_tail	431	68.8889	All	p5_200306_200311_200311_a000	200306_200311	P5
1758	twitch_tail	442	28.3333	All	p5_200306_200311_200311_a000	200306_200311	P5
1759	twitch_tail	1243	63.7681	All	p5_200306_200311_200311_a000	200306_200311	P5
1760	twitch_tail	1498	46.9274	All	p5_200306_200311_200311_a000	200306_200311	P5
1761	twitch_tail	1711	79.3478	All	p5_200306_200311_200311_a000	200306_200311	P5
1762	twitch_tail	1823	60.9195	All	p5_200306_200311_200311_a000	200306_200311	P5
1763	twitch_tail	2043	50.6098	All	p5_200306_200311_200311_a000	200306_200311	P5
1764	twitch_tail	2639	65.1515	All	p5_200306_200311_200311_a000	200306_200311	P5
1765	twitch_tail	2736	81.3187	All	p5_200306_200311_200311_a000	200306_200311	P5
1766	twitch_tail	3040	83.0508	All	p5_200306_200311_200311_a000	200306_200311	P5
1767	twitch_tail	3094	61.2903	All	p5_200306_200311_200311_a000	200306_200311	P5
1768	twitch_tail	3205	51.0067	All	p5_200306_200311_200311_a000	200306_200311	P5
1769	twitch_tail	3699	79.5699	All	p5_200306_200311_200311_a000	200306_200311	P5
1770	twitch_tail	3880	68.2171	All	p5_200306_200311_200311_a000	200306_200311	P5
1771	twitch_tail	3924	90	All	p5_200306_200311_200311_a000	200306_200311	P5
1772	twitch_tail	3984	82.5	All	p5_200306_200311_200311_a000	200306_200311	P5
1773	twitch_tail	4107	42.9487	All	p5_200306_200311_200311_a000	200306_200311	P5
1774	twitch_tail	4701	63.6872	All	p5_200306_200311_200311_a000	200306_200311	P5
1775	twitch_tail	5348	69.3878	All	p5_200306_200311_200311_a000	200306_200311	P5
1776	twitch_tail	5621	56.5476	All	p5_200306_200311_200311_a000	200306_200311	P5
1777	twitch_tail	5913	38.7755	All	p5_200306_200311_200311_a000	200306_200311	P5
1778	twitch_tail	5991	47.561	All	p5_200306_200311_200311_a000	200306_200311	P5
1779	twitch_tail	6234	94.1176	All	p5_200306_200311_200311_a000	200306_200311	P5
1780	twitch_tail	6264	65.2482	All	p5_200306_200311_200311_a000	200306_200311	P5
1781	twitch_tail	6609	55.8333	All	p5_200306_200311_200311_a000	200306_200311	P5
1782	twitch_tail	7010	59.1549	All	p5_200306_200311_200311_a000	200306_200311	P5
1783	twitch_tail	7230	82.0225	All	p5_200306_200311_200311_a000	200306_200311	P5
1784	twitch_tail	7372	86.9565	All	p5_200306_200311_200311_a000	200306_200311	P5
1785	twitch_tail	9696	60.479	All	p5_200306_200311_200311_a000	200306_200311	P5
1786	twitch_tail	9725	16.6667	All	p5_200306_200311_200311_a000	200306_200311	P5
1787	twitch_tail	10252	45.9893	All	p5_200306_200311_200311_a000	200306_200311	P5
1788	twitch_tail	10735	50	All	p5_200306_200311_200311_a000	200306_200311	P5
1789	twitch_tail	10889	64.4231	All	p5_200306_200311_200311_a000	200306_200311	P5
1790	twitch_tail	10945	65.3226	All	p5_200306_200311_200311_a000	200306_200311	P5
1791	twitch_tail	11298	82.4176	All	p5_200306_200311_200311_a000	200306_200311	P5
1792	twitch_tail	11450	76.1905	All	p5_200306_200311_200311_a000	200306_200311	P5
1793	twitch_tail	11694	94.4444	All	p5_200306_200311_200311_a000	200306_200311	P5
1794	complex_mvt	70	38.0531	All	p5_200306_200311_200311_a001	200306_200311	P5
1795	complex_mvt	1482	39.2857	All	p5_200306_200311_200311_a001	200306_200311	P5
1796	complex_mvt	1501	15.3846	All	p5_200306_200311_200311_a001	200306_200311	P5
1797	complex_mvt	1880	40	All	p5_200306_200311_200311_a001	200306_200311	P5
1798	complex_mvt	2265	100	All	p5_200306_200311_200311_a001	200306_200311	P5
1799	complex_mvt	2417	28.8462	All	p5_200306_200311_200311_a001	200306_200311	P5
1800	complex_mvt	6145	16.3934	All	p5_200306_200311_200311_a001	200306_200311	P5
1801	mvt_forelimb_left	799	6.25	All	p5_200306_200311_200311_a001	200306_200311	P5
1802	mvt_forelimb_left	816	40	All	p5_200306_200311_200311_a001	200306_200311	P5
1803	mvt_forelimb_left	984	14.2857	All	p5_200306_200311_200311_a001	200306_200311	P5
1804	mvt_forelimb_left	994	23.0769	All	p5_200306_200311_200311_a001	200306_200311	P5
1805	mvt_forelimb_left	1097	90.4762	All	p5_200306_200311_200311_a001	200306_200311	P5
1806	mvt_forelimb_left	1360	26.9663	All	p5_200306_200311_200311_a001	200306_200311	P5
1807	mvt_forelimb_left	1369	20	All	p5_200306_200311_200311_a001	200306_200311	P5
1808	mvt_forelimb_left	2869	96.875	All	p5_200306_200311_200311_a001	200306_200311	P5
1809	mvt_forelimb_left	3782	5.19481	All	p5_200306_200311_200311_a001	200306_200311	P5
1810	mvt_forelimb_left	4870	12.5	All	p5_200306_200311_200311_a001	200306_200311	P5
1811	mvt_forelimb_left	5024	28.5714	All	p5_200306_200311_200311_a001	200306_200311	P5
1812	mvt_forelimb_left	6493	100	All	p5_200306_200311_200311_a001	200306_200311	P5
1813	mvt_hindlimb_right	1225	63.6364	All	p5_200306_200311_200311_a001	200306_200311	P5
1814	startle	57	57.5342	All	p5_200306_200311_200311_a001	200306_200311	P5
1815	startle	196	100	All	p5_200306_200311_200311_a001	200306_200311	P5
1816	startle	609	81.1594	All	p5_200306_200311_200311_a001	200306_200311	P5
1817	startle	1104	77.2727	All	p5_200306_200311_200311_a001	200306_200311	P5
1818	startle	1185	96.7742	All	p5_200306_200311_200311_a001	200306_200311	P5
1819	startle	1426	27.7778	All	p5_200306_200311_200311_a001	200306_200311	P5
1820	startle	1603	100	All	p5_200306_200311_200311_a001	200306_200311	P5
1821	startle	1868	100	All	p5_200306_200311_200311_a001	200306_200311	P5
1822	startle	1969	100	All	p5_200306_200311_200311_a001	200306_200311	P5
1823	startle	2408	98.0392	All	p5_200306_200311_200311_a001	200306_200311	P5
1824	startle	2989	41.6667	All	p5_200306_200311_200311_a001	200306_200311	P5
1825	startle	3178	21.4286	All	p5_200306_200311_200311_a001	200306_200311	P5
1826	startle	4429	42.6966	All	p5_200306_200311_200311_a001	200306_200311	P5
1827	startle	5089	79.3103	All	p5_200306_200311_200311_a001	200306_200311	P5
1828	startle	5382	83.3333	All	p5_200306_200311_200311_a001	200306_200311	P5
1829	startle	7261	83.1169	All	p5_200306_200311_200311_a001	200306_200311	P5
1830	twitch_forelimb_left	54	60.2941	All	p5_200306_200311_200311_a001	200306_200311	P5
1831	twitch_forelimb_left	59	47.5524	All	p5_200306_200311_200311_a001	200306_200311	P5
1832	twitch_forelimb_left	218	35	All	p5_200306_200311_200311_a001	200306_200311	P5
1833	twitch_forelimb_left	390	100	All	p5_200306_200311_200311_a001	200306_200311	P5
1834	twitch_forelimb_left	437	100	All	p5_200306_200311_200311_a001	200306_200311	P5
1835	twitch_forelimb_left	557	84.4828	All	p5_200306_200311_200311_a001	200306_200311	P5
1836	twitch_forelimb_left	606	85.2941	All	p5_200306_200311_200311_a001	200306_200311	P5
1837	twitch_forelimb_left	613	34.3284	All	p5_200306_200311_200311_a001	200306_200311	P5
1838	twitch_forelimb_left	710	77.0833	All	p5_200306_200311_200311_a001	200306_200311	P5
1839	twitch_forelimb_left	874	44.186	All	p5_200306_200311_200311_a001	200306_200311	P5
1840	twitch_forelimb_left	885	90.566	All	p5_200306_200311_200311_a001	200306_200311	P5
1841	twitch_forelimb_left	907	8.69565	All	p5_200306_200311_200311_a001	200306_200311	P5
1842	twitch_forelimb_left	1014	62.5	All	p5_200306_200311_200311_a001	200306_200311	P5
1843	twitch_forelimb_left	1020	92.3077	All	p5_200306_200311_200311_a001	200306_200311	P5
1844	twitch_forelimb_left	1027	97.561	All	p5_200306_200311_200311_a001	200306_200311	P5
1845	twitch_forelimb_left	1035	82.0513	All	p5_200306_200311_200311_a001	200306_200311	P5
1846	twitch_forelimb_left	1058	20.2703	All	p5_200306_200311_200311_a001	200306_200311	P5
1847	twitch_forelimb_left	1089	87.5	All	p5_200306_200311_200311_a001	200306_200311	P5
1848	twitch_forelimb_left	1163	33.3333	All	p5_200306_200311_200311_a001	200306_200311	P5
1849	twitch_forelimb_left	1352	79.3103	All	p5_200306_200311_200311_a001	200306_200311	P5
1850	twitch_forelimb_left	1401	78.3505	All	p5_200306_200311_200311_a001	200306_200311	P5
1851	twitch_forelimb_left	1407	17.3913	All	p5_200306_200311_200311_a001	200306_200311	P5
1852	twitch_forelimb_left	1735	8.10811	All	p5_200306_200311_200311_a001	200306_200311	P5
1853	twitch_forelimb_left	1738	10.3448	All	p5_200306_200311_200311_a001	200306_200311	P5
1854	twitch_forelimb_left	1874	25	All	p5_200306_200311_200311_a001	200306_200311	P5
1855	twitch_forelimb_left	1973	60.4167	All	p5_200306_200311_200311_a001	200306_200311	P5
1856	twitch_forelimb_left	2099	74.359	All	p5_200306_200311_200311_a001	200306_200311	P5
1857	twitch_forelimb_left	2105	26.9841	All	p5_200306_200311_200311_a001	200306_200311	P5
1858	twitch_forelimb_left	2126	85.7143	All	p5_200306_200311_200311_a001	200306_200311	P5
1859	twitch_forelimb_left	2226	71.9101	All	p5_200306_200311_200311_a001	200306_200311	P5
1860	twitch_forelimb_left	2229	77.9221	All	p5_200306_200311_200311_a001	200306_200311	P5
1861	twitch_forelimb_left	2234	13.4328	All	p5_200306_200311_200311_a001	200306_200311	P5
1862	twitch_forelimb_left	2413	58.8235	All	p5_200306_200311_200311_a001	200306_200311	P5
1863	twitch_forelimb_left	2550	79.3814	All	p5_200306_200311_200311_a001	200306_200311	P5
1864	twitch_forelimb_left	2657	46.9388	All	p5_200306_200311_200311_a001	200306_200311	P5
1865	twitch_forelimb_left	2673	68.4211	All	p5_200306_200311_200311_a001	200306_200311	P5
1866	twitch_forelimb_left	2741	90.9091	All	p5_200306_200311_200311_a001	200306_200311	P5
1867	twitch_forelimb_left	2884	78.7234	All	p5_200306_200311_200311_a001	200306_200311	P5
1868	twitch_forelimb_left	2961	87.7778	All	p5_200306_200311_200311_a001	200306_200311	P5
1869	twitch_forelimb_left	3083	28.5714	All	p5_200306_200311_200311_a001	200306_200311	P5
1870	twitch_forelimb_left	3187	16.6667	All	p5_200306_200311_200311_a001	200306_200311	P5
1871	twitch_forelimb_left	3223	78.125	All	p5_200306_200311_200311_a001	200306_200311	P5
1872	twitch_forelimb_left	3228	15.1515	All	p5_200306_200311_200311_a001	200306_200311	P5
1873	twitch_forelimb_left	3313	78.3505	All	p5_200306_200311_200311_a001	200306_200311	P5
1874	twitch_forelimb_left	3315	46.3918	All	p5_200306_200311_200311_a001	200306_200311	P5
1875	twitch_forelimb_left	3319	21.4286	All	p5_200306_200311_200311_a001	200306_200311	P5
1876	twitch_forelimb_left	3440	85.7143	All	p5_200306_200311_200311_a001	200306_200311	P5
1877	twitch_forelimb_left	3496	76.3441	All	p5_200306_200311_200311_a001	200306_200311	P5
1878	twitch_forelimb_left	3504	31.9444	All	p5_200306_200311_200311_a001	200306_200311	P5
1879	twitch_forelimb_left	3611	90.1639	All	p5_200306_200311_200311_a001	200306_200311	P5
1880	twitch_forelimb_left	3639	18.1818	All	p5_200306_200311_200311_a001	200306_200311	P5
1881	twitch_forelimb_left	3758	68.75	All	p5_200306_200311_200311_a001	200306_200311	P5
1882	twitch_forelimb_left	3770	41.9048	All	p5_200306_200311_200311_a001	200306_200311	P5
1883	twitch_forelimb_left	3776	16.8539	All	p5_200306_200311_200311_a001	200306_200311	P5
1884	twitch_forelimb_left	3859	86.3636	All	p5_200306_200311_200311_a001	200306_200311	P5
1885	twitch_forelimb_left	3919	97	All	p5_200306_200311_200311_a001	200306_200311	P5
1886	twitch_forelimb_left	3969	51.3761	All	p5_200306_200311_200311_a001	200306_200311	P5
1887	twitch_forelimb_left	4085	65.2174	All	p5_200306_200311_200311_a001	200306_200311	P5
1888	twitch_forelimb_left	4131	46.9027	All	p5_200306_200311_200311_a001	200306_200311	P5
1889	twitch_forelimb_left	4138	6.81818	All	p5_200306_200311_200311_a001	200306_200311	P5
1890	twitch_forelimb_left	4160	100	All	p5_200306_200311_200311_a001	200306_200311	P5
1891	twitch_forelimb_left	4162	71.4286	All	p5_200306_200311_200311_a001	200306_200311	P5
1892	twitch_forelimb_left	4236	64.6018	All	p5_200306_200311_200311_a001	200306_200311	P5
1893	twitch_forelimb_left	4241	49.1803	All	p5_200306_200311_200311_a001	200306_200311	P5
1894	twitch_forelimb_left	4258	35.2273	All	p5_200306_200311_200311_a001	200306_200311	P5
1895	twitch_forelimb_left	4264	39.7436	All	p5_200306_200311_200311_a001	200306_200311	P5
1896	twitch_forelimb_left	4268	30.7692	All	p5_200306_200311_200311_a001	200306_200311	P5
1897	twitch_forelimb_left	4273	25	All	p5_200306_200311_200311_a001	200306_200311	P5
1898	twitch_forelimb_left	4280	11.4286	All	p5_200306_200311_200311_a001	200306_200311	P5
1899	twitch_forelimb_left	4342	36.1905	All	p5_200306_200311_200311_a001	200306_200311	P5
1900	twitch_forelimb_left	4347	23.6559	All	p5_200306_200311_200311_a001	200306_200311	P5
1901	twitch_forelimb_left	4508	96.4912	All	p5_200306_200311_200311_a001	200306_200311	P5
1902	twitch_forelimb_left	4515	37.2881	All	p5_200306_200311_200311_a001	200306_200311	P5
1903	twitch_forelimb_left	4534	17.6471	All	p5_200306_200311_200311_a001	200306_200311	P5
1904	twitch_forelimb_left	4657	68.75	All	p5_200306_200311_200311_a001	200306_200311	P5
1905	twitch_forelimb_left	4723	75.5556	All	p5_200306_200311_200311_a001	200306_200311	P5
1906	twitch_forelimb_left	4799	85.9649	All	p5_200306_200311_200311_a001	200306_200311	P5
1907	twitch_forelimb_left	4808	81.9672	All	p5_200306_200311_200311_a001	200306_200311	P5
1908	twitch_forelimb_left	4812	72.1311	All	p5_200306_200311_200311_a001	200306_200311	P5
1909	twitch_forelimb_left	4828	18.6441	All	p5_200306_200311_200311_a001	200306_200311	P5
1910	twitch_forelimb_left	4835	35	All	p5_200306_200311_200311_a001	200306_200311	P5
1911	twitch_forelimb_left	4940	42.1769	All	p5_200306_200311_200311_a001	200306_200311	P5
1912	twitch_forelimb_left	4891	60	All	p5_200306_200311_200311_a001	200306_200311	P5
1913	twitch_forelimb_left	4900	55.5556	All	p5_200306_200311_200311_a001	200306_200311	P5
1914	twitch_forelimb_left	4950	44.1667	All	p5_200306_200311_200311_a001	200306_200311	P5
1915	twitch_forelimb_left	5049	100	All	p5_200306_200311_200311_a001	200306_200311	P5
1916	twitch_forelimb_left	5090	71.1864	All	p5_200306_200311_200311_a001	200306_200311	P5
1917	twitch_forelimb_left	5156	61.3636	All	p5_200306_200311_200311_a001	200306_200311	P5
1918	twitch_forelimb_left	5159	43.1818	All	p5_200306_200311_200311_a001	200306_200311	P5
1919	twitch_forelimb_left	5165	14.2857	All	p5_200306_200311_200311_a001	200306_200311	P5
1920	twitch_forelimb_left	5176	17.3913	All	p5_200306_200311_200311_a001	200306_200311	P5
1921	twitch_forelimb_left	5190	53.3333	All	p5_200306_200311_200311_a001	200306_200311	P5
1922	twitch_forelimb_left	5270	94.4444	All	p5_200306_200311_200311_a001	200306_200311	P5
1923	twitch_forelimb_left	5355	50.9804	All	p5_200306_200311_200311_a001	200306_200311	P5
1924	twitch_forelimb_left	5402	22.2222	All	p5_200306_200311_200311_a001	200306_200311	P5
1925	twitch_forelimb_left	5493	90.566	All	p5_200306_200311_200311_a001	200306_200311	P5
1926	twitch_forelimb_left	5501	28.3019	All	p5_200306_200311_200311_a001	200306_200311	P5
1927	twitch_forelimb_left	5522	50	All	p5_200306_200311_200311_a001	200306_200311	P5
1928	twitch_forelimb_left	5612	41.9355	All	p5_200306_200311_200311_a001	200306_200311	P5
1929	twitch_forelimb_left	5616	19.6721	All	p5_200306_200311_200311_a001	200306_200311	P5
1930	twitch_forelimb_left	5707	35.4839	All	p5_200306_200311_200311_a001	200306_200311	P5
1931	twitch_forelimb_left	5741	64	All	p5_200306_200311_200311_a001	200306_200311	P5
1932	twitch_forelimb_left	5748	7.69231	All	p5_200306_200311_200311_a001	200306_200311	P5
1933	twitch_forelimb_left	5847	81.25	All	p5_200306_200311_200311_a001	200306_200311	P5
1934	twitch_forelimb_left	5901	94.7368	All	p5_200306_200311_200311_a001	200306_200311	P5
1935	twitch_forelimb_left	5953	0	All	p5_200306_200311_200311_a001	200306_200311	P5
1936	twitch_forelimb_left	6004	16.3265	All	p5_200306_200311_200311_a001	200306_200311	P5
1937	twitch_forelimb_left	6140	25	All	p5_200306_200311_200311_a001	200306_200311	P5
1938	twitch_forelimb_left	6269	100	All	p5_200306_200311_200311_a001	200306_200311	P5
1939	twitch_forelimb_left	6312	100	All	p5_200306_200311_200311_a001	200306_200311	P5
1940	twitch_forelimb_left	6447	38.7097	All	p5_200306_200311_200311_a001	200306_200311	P5
1941	twitch_forelimb_left	6584	92.8571	All	p5_200306_200311_200311_a001	200306_200311	P5
1942	twitch_forelimb_left	6676	50.7246	All	p5_200306_200311_200311_a001	200306_200311	P5
1943	twitch_forelimb_left	6684	16.4179	All	p5_200306_200311_200311_a001	200306_200311	P5
1944	twitch_forelimb_left	6697	13.6364	All	p5_200306_200311_200311_a001	200306_200311	P5
1945	twitch_forelimb_left	6713	83.3333	All	p5_200306_200311_200311_a001	200306_200311	P5
1946	twitch_forelimb_left	6924	87.1795	All	p5_200306_200311_200311_a001	200306_200311	P5
1947	twitch_forelimb_left	6946	64.5161	All	p5_200306_200311_200311_a001	200306_200311	P5
1948	twitch_forelimb_left	7089	0	All	p5_200306_200311_200311_a001	200306_200311	P5
1949	twitch_forelimb_left	7152	93.75	All	p5_200306_200311_200311_a001	200306_200311	P5
1950	twitch_forelimb_left	7245	67.3469	All	p5_200306_200311_200311_a001	200306_200311	P5
1951	twitch_forelimb_left	7265	43.2432	All	p5_200306_200311_200311_a001	200306_200311	P5
1952	twitch_forelimb_left	7371	37.7358	All	p5_200306_200311_200311_a001	200306_200311	P5
1953	twitch_forelimb_left	7444	51.7241	All	p5_200306_200311_200311_a001	200306_200311	P5
1954	twitch_forelimb_left	7463	81.7204	All	p5_200306_200311_200311_a001	200306_200311	P5
1955	twitch_forelimb_right	557	84.4828	All	p5_200306_200311_200311_a001	200306_200311	P5
1956	twitch_forelimb_right	709	91.6667	All	p5_200306_200311_200311_a001	200306_200311	P5
1957	twitch_forelimb_right	1401	78.3505	All	p5_200306_200311_200311_a001	200306_200311	P5
1958	twitch_forelimb_right	1543	92.8571	All	p5_200306_200311_200311_a001	200306_200311	P5
1959	twitch_forelimb_right	1833	24.2105	All	p5_200306_200311_200311_a001	200306_200311	P5
1960	twitch_forelimb_right	1874	25	All	p5_200306_200311_200311_a001	200306_200311	P5
1961	twitch_forelimb_right	2099	74.359	All	p5_200306_200311_200311_a001	200306_200311	P5
1962	twitch_forelimb_right	2226	71.9101	All	p5_200306_200311_200311_a001	200306_200311	P5
1963	twitch_forelimb_right	2413	58.8235	All	p5_200306_200311_200311_a001	200306_200311	P5
1964	twitch_forelimb_right	2553	53.6842	All	p5_200306_200311_200311_a001	200306_200311	P5
1965	twitch_forelimb_right	2671	74.5763	All	p5_200306_200311_200311_a001	200306_200311	P5
1966	twitch_forelimb_right	3081	32.7273	All	p5_200306_200311_200311_a001	200306_200311	P5
1967	twitch_forelimb_right	3186	25	All	p5_200306_200311_200311_a001	200306_200311	P5
1968	twitch_forelimb_right	3222	81.25	All	p5_200306_200311_200311_a001	200306_200311	P5
1969	twitch_forelimb_right	3441	85.7143	All	p5_200306_200311_200311_a001	200306_200311	P5
1970	twitch_forelimb_right	3503	39.726	All	p5_200306_200311_200311_a001	200306_200311	P5
1971	twitch_forelimb_right	3644	13.4615	All	p5_200306_200311_200311_a001	200306_200311	P5
1972	twitch_forelimb_right	3771	35.6436	All	p5_200306_200311_200311_a001	200306_200311	P5
1973	twitch_forelimb_right	3859	86.3636	All	p5_200306_200311_200311_a001	200306_200311	P5
1974	twitch_forelimb_right	4264	39.7436	All	p5_200306_200311_200311_a001	200306_200311	P5
1975	twitch_forelimb_right	4280	11.4286	All	p5_200306_200311_200311_a001	200306_200311	P5
1976	twitch_forelimb_right	4344	25.4902	All	p5_200306_200311_200311_a001	200306_200311	P5
1977	twitch_forelimb_right	4509	94.7368	All	p5_200306_200311_200311_a001	200306_200311	P5
1978	twitch_forelimb_right	4516	33.8983	All	p5_200306_200311_200311_a001	200306_200311	P5
1979	twitch_forelimb_right	4533	13.0435	All	p5_200306_200311_200311_a001	200306_200311	P5
1980	twitch_forelimb_right	4657	68.75	All	p5_200306_200311_200311_a001	200306_200311	P5
1981	twitch_forelimb_right	4939	39.8693	All	p5_200306_200311_200311_a001	200306_200311	P5
1982	twitch_forelimb_right	5155	69.6629	All	p5_200306_200311_200311_a001	200306_200311	P5
1983	twitch_forelimb_right	5165	14.2857	All	p5_200306_200311_200311_a001	200306_200311	P5
1984	twitch_forelimb_right	5175	14.2857	All	p5_200306_200311_200311_a001	200306_200311	P5
1985	twitch_forelimb_right	5190	53.3333	All	p5_200306_200311_200311_a001	200306_200311	P5
1986	twitch_forelimb_right	5354	60.7843	All	p5_200306_200311_200311_a001	200306_200311	P5
1987	twitch_forelimb_right	5360	19.2308	All	p5_200306_200311_200311_a001	200306_200311	P5
1988	twitch_forelimb_right	5402	22.2222	All	p5_200306_200311_200311_a001	200306_200311	P5
1989	twitch_forelimb_right	5501	28.3019	All	p5_200306_200311_200311_a001	200306_200311	P5
1990	twitch_forelimb_right	5520	40	All	p5_200306_200311_200311_a001	200306_200311	P5
1991	twitch_forelimb_right	5741	64	All	p5_200306_200311_200311_a001	200306_200311	P5
1992	twitch_forelimb_right	5746	11.5385	All	p5_200306_200311_200311_a001	200306_200311	P5
1993	twitch_forelimb_right	5901	94.7368	All	p5_200306_200311_200311_a001	200306_200311	P5
1994	twitch_forelimb_right	6140	27.5862	All	p5_200306_200311_200311_a001	200306_200311	P5
1995	twitch_forelimb_right	6447	38.7097	All	p5_200306_200311_200311_a001	200306_200311	P5
1996	twitch_forelimb_right	6552	68.4211	All	p5_200306_200311_200311_a001	200306_200311	P5
1997	twitch_forelimb_right	6567	11.4754	All	p5_200306_200311_200311_a001	200306_200311	P5
1998	twitch_forelimb_right	6583	92.8571	All	p5_200306_200311_200311_a001	200306_200311	P5
[truncated: 5,375 more rows]
