# Supplementary material for: The rapid developmental rise of somatic inhibition disengages hippocampal dynamics from self-motion
Source: eLife journal article supplement (doi:10.7554/elife.78116), 2022-07-20
Supplement: supp [file activation_ratio_all_moves_table_adapted.xlsx]

## Sheet: Sheet1
	Activity ratio	Celltype	Session	SubjectID	Group
0	63.6364	All	p10_190921_191001_191001_a000	190921_191001	P10
1	49.1525	All	p10_190921_191001_191001_a000	190921_191001	P10
2	56.6038	All	p10_190921_191001_191001_a000	190921_191001	P10
3	23.5294	All	p10_190921_191001_191001_a000	190921_191001	P10
4	29.1667	All	p10_190921_191001_191001_a000	190921_191001	P10
5	66.6667	All	p10_190921_191001_191001_a000	190921_191001	P10
6	7.35294	All	p10_190921_191001_191001_a000	190921_191001	P10
7	34.2857	All	p10_190921_191001_191001_a000	190921_191001	P10
8	35.1852	All	p10_190921_191001_191001_a000	190921_191001	P10
9	65.1163	All	p10_190921_191001_191001_a000	190921_191001	P10
10	53.3333	All	p10_190921_191001_191001_a000	190921_191001	P10
11	88.4615	All	p10_190921_191001_191001_a000	190921_191001	P10
12	29.8246	All	p10_190921_191001_191001_a000	190921_191001	P10
13	26.3158	All	p10_190921_191001_191001_a000	190921_191001	P10
14	56	All	p10_190921_191001_191001_a000	190921_191001	P10
15	37.5	All	p10_190921_191001_191001_a000	190921_191001	P10
16	42.8571	All	p10_190921_191001_191001_a000	190921_191001	P10
17	38.961	All	p10_190921_191001_191001_a000	190921_191001	P10
18	44.4444	All	p10_190921_191001_191001_a000	190921_191001	P10
19	29.8246	All	p10_190921_191001_191001_a000	190921_191001	P10
20	53.8462	All	p10_190921_191001_191001_a000	190921_191001	P10
21	38.8889	All	p10_190921_191001_191001_a000	190921_191001	P10
22	35.9375	All	p10_190921_191001_191001_a000	190921_191001	P10
23	33.3333	All	p10_190921_191001_191001_a000	190921_191001	P10
24	53.4483	All	p10_190921_191001_191001_a000	190921_191001	P10
25	37.8049	All	p10_190921_191001_191001_a000	190921_191001	P10
26	24.5902	All	p10_190921_191001_191001_a000	190921_191001	P10
27	55.814	All	p10_190921_191001_191001_a000	190921_191001	P10
28	10.2041	All	p10_190921_191001_191001_a000	190921_191001	P10
29	47.1698	All	p10_190921_191001_191001_a000	190921_191001	P10
30	22.6415	All	p10_190921_191001_191001_a000	190921_191001	P10
31	43.1034	All	p10_190921_191001_191001_a000	190921_191001	P10
32	40.5405	All	p10_190921_191001_191001_a000	190921_191001	P10
33	39.4737	All	p10_190921_191001_191001_a000	190921_191001	P10
34	25.4902	All	p10_190921_191001_191001_a000	190921_191001	P10
35	28.3019	All	p10_190921_191001_191001_a000	190921_191001	P10
36	61.2903	All	p10_190921_191001_191001_a000	190921_191001	P10
37	49.2958	All	p10_190921_191001_191001_a000	190921_191001	P10
38	32.4324	All	p10_190921_191001_191001_a000	190921_191001	P10
39	40	All	p10_190921_191001_191001_a000	190921_191001	P10
40	26.087	All	p10_190921_191001_191001_a000	190921_191001	P10
41	39.1304	All	p10_190921_191001_191001_a000	190921_191001	P10
42	12.5	All	p10_190921_191001_191001_a000	190921_191001	P10
43	15.5556	All	p10_190921_191001_191001_a000	190921_191001	P10
44	79.4118	All	p10_190921_191001_191001_a000	190921_191001	P10
45	47.619	All	p10_190921_191001_191001_a000	190921_191001	P10
46	19.4444	All	p10_190921_191001_191001_a000	190921_191001	P10
47	48.7179	All	p10_190921_191001_191001_a000	190921_191001	P10
48	52.5	All	p10_190921_191001_191001_a000	190921_191001	P10
49	88.8889	All	p10_190921_191001_191001_a000	190921_191001	P10
50	65.7895	All	p10_190921_191001_191001_a000	190921_191001	P10
51	47.8261	All	p10_190921_191001_191001_a000	190921_191001	P10
52	47.1698	All	p10_190921_191001_191001_a000	190921_191001	P10
53	42.5532	All	p10_190921_191001_191001_a000	190921_191001	P10
54	78.2609	All	p10_190921_191001_191001_a000	190921_191001	P10
55	22.2222	All	p10_190921_191001_191001_a000	190921_191001	P10
56	48.7805	All	p10_190921_191001_191001_a000	190921_191001	P10
57	33.3333	All	p10_190921_191001_191001_a000	190921_191001	P10
58	35.0877	All	p10_190921_191001_191001_a000	190921_191001	P10
59	32.2581	All	p10_190921_191001_191001_a000	190921_191001	P10
60	39.1304	All	p10_190921_191001_191001_a000	190921_191001	P10
61	25	All	p10_190921_191001_191001_a000	190921_191001	P10
62	65	All	p10_190921_191001_191001_a000	190921_191001	P10
63	29.4118	All	p10_190921_191001_191001_a000	190921_191001	P10
64	60.4167	All	p10_190921_191001_191001_a000	190921_191001	P10
65	58.0645	All	p10_190921_191001_191001_a000	190921_191001	P10
66	37.5	All	p10_190921_191001_191001_a000	190921_191001	P10
67	36.9231	All	p10_190921_191001_191001_a000	190921_191001	P10
68	19.2982	All	p10_190921_191001_191001_a000	190921_191001	P10
69	24.3902	All	p10_190921_191001_191001_a000	190921_191001	P10
70	34.0426	All	p10_190921_191001_191001_a000	190921_191001	P10
71	29.8507	All	p10_190921_191001_191001_a000	190921_191001	P10
72	26.6667	All	p10_190921_191001_191001_a000	190921_191001	P10
73	40.7407	All	p10_190921_191001_191001_a000	190921_191001	P10
74	23.5294	All	p10_190921_191001_191001_a000	190921_191001	P10
75	53.1915	All	p10_190921_191001_191001_a000	190921_191001	P10
76	26.8293	All	p10_190921_191001_191001_a000	190921_191001	P10
77	22.2222	All	p10_190921_191001_191001_a000	190921_191001	P10
78	26.5306	All	p10_190921_191001_191001_a000	190921_191001	P10
79	37.5	All	p10_190921_191001_191001_a000	190921_191001	P10
80	35.4839	All	p10_190921_191001_191001_a000	190921_191001	P10
81	55.1724	All	p10_190921_191001_191001_a000	190921_191001	P10
82	40	All	p10_190921_191001_191001_a000	190921_191001	P10
83	29	All	p11_190921_191002_191002_a001	190921_191002	P11
84	51.7857	All	p11_190921_191002_191002_a001	190921_191002	P11
85	35.443	All	p11_190921_191002_191002_a001	190921_191002	P11
86	33.3333	All	p11_190921_191002_191002_a001	190921_191002	P11
87	86.7925	All	p11_190921_191002_191002_a001	190921_191002	P11
88	57.1429	All	p11_190921_191002_191002_a001	190921_191002	P11
89	53.2258	All	p11_190921_191002_191002_a001	190921_191002	P11
90	22.9885	All	p11_190921_191002_191002_a001	190921_191002	P11
91	25.6757	All	p11_190921_191002_191002_a001	190921_191002	P11
92	30.4348	All	p11_190921_191002_191002_a001	190921_191002	P11
93	81.8182	All	p11_190921_191002_191002_a001	190921_191002	P11
94	41.9753	All	p11_190921_191002_191002_a001	190921_191002	P11
95	20.4545	All	p11_190921_191002_191002_a001	190921_191002	P11
96	30	All	p11_190921_191002_191002_a001	190921_191002	P11
97	29.4118	All	p11_190921_191002_191002_a001	190921_191002	P11
98	41.8182	All	p11_190921_191002_191002_a001	190921_191002	P11
99	46.9388	All	p11_190921_191002_191002_a001	190921_191002	P11
100	94.5946	All	p11_190921_191002_191002_a001	190921_191002	P11
101	20	All	p11_190921_191002_191002_a001	190921_191002	P11
102	31.4815	All	p11_190921_191002_191002_a001	190921_191002	P11
103	24.3902	All	p11_190921_191002_191002_a001	190921_191002	P11
104	41.5842	All	p11_190921_191002_191002_a001	190921_191002	P11
105	42.1053	All	p11_190921_191002_191002_a001	190921_191002	P11
106	57.8947	All	p11_190921_191002_191002_a001	190921_191002	P11
107	83.1325	All	p11_190921_191002_191002_a001	190921_191002	P11
108	34.9206	All	p11_190921_191002_191002_a001	190921_191002	P11
109	45.4545	All	p11_190921_191002_191002_a001	190921_191002	P11
110	17.4603	All	p11_190921_191002_191002_a001	190921_191002	P11
111	46.6667	All	p11_190921_191002_191002_a001	190921_191002	P11
112	23.7288	All	p11_190921_191002_191002_a001	190921_191002	P11
113	34.2857	All	p11_190921_191002_191002_a001	190921_191002	P11
114	22.5806	All	p11_190921_191002_191002_a001	190921_191002	P11
115	39.3617	All	p11_190921_191002_191002_a001	190921_191002	P11
116	21.0526	All	p11_190921_191002_191002_a001	190921_191002	P11
117	10.3448	All	p11_190921_191002_191002_a001	190921_191002	P11
118	30.8642	All	p11_190921_191002_191002_a001	190921_191002	P11
119	27.6923	All	p11_190921_191002_191002_a001	190921_191002	P11
120	32.3529	All	p11_190921_191002_191002_a001	190921_191002	P11
121	37.7049	All	p11_190921_191002_191002_a001	190921_191002	P11
122	92.0635	All	p11_190921_191002_191002_a001	190921_191002	P11
123	47	All	p11_190921_191002_191002_a001	190921_191002	P11
124	23.8095	All	p11_190921_191002_191002_a001	190921_191002	P11
125	43.1034	All	p11_190921_191002_191002_a001	190921_191002	P11
126	14.2857	All	p11_190921_191002_191002_a001	190921_191002	P11
127	33.3333	All	p11_190921_191002_191002_a001	190921_191002	P11
128	38.7755	All	p11_190921_191002_191002_a001	190921_191002	P11
129	15.3846	All	p11_190921_191002_191002_a001	190921_191002	P11
130	48.4375	All	p11_190921_191002_191002_a001	190921_191002	P11
131	12.5	All	p11_190921_191002_191002_a001	190921_191002	P11
132	45.283	All	p11_190921_191002_191002_a001	190921_191002	P11
133	36.6337	All	p11_190921_191002_191002_a001	190921_191002	P11
134	42.3077	All	p11_190921_191002_191002_a001	190921_191002	P11
135	53.5714	All	p11_190921_191002_191002_a001	190921_191002	P11
136	22	All	p11_190921_191002_191002_a001	190921_191002	P11
137	27.5362	All	p11_190921_191002_191002_a001	190921_191002	P11
138	64.8649	All	p11_190921_191002_191002_a001	190921_191002	P11
139	42.1875	All	p11_190921_191002_191002_a001	190921_191002	P11
140	26.087	All	p12_171029_171110_171110_a000	171029_171110	P12
141	42.5532	All	p12_171029_171110_171110_a000	171029_171110	P12
142	36.1702	All	p12_171029_171110_171110_a000	171029_171110	P12
143	83.3333	All	p12_171029_171110_171110_a000	171029_171110	P12
144	36.7347	All	p12_171029_171110_171110_a000	171029_171110	P12
145	58.3333	All	p12_171029_171110_171110_a000	171029_171110	P12
146	23.913	All	p12_171029_171110_171110_a000	171029_171110	P12
147	28.3333	All	p12_171029_171110_171110_a000	171029_171110	P12
148	41.8605	All	p12_171029_171110_171110_a000	171029_171110	P12
149	19.469	All	p12_171029_171110_171110_a000	171029_171110	P12
150	33.3333	All	p12_171029_171110_171110_a000	171029_171110	P12
151	35.8974	All	p12_171029_171110_171110_a000	171029_171110	P12
152	33.3333	All	p12_171029_171110_171110_a000	171029_171110	P12
153	20.5128	All	p12_171029_171110_171110_a000	171029_171110	P12
154	42.8571	All	p12_171029_171110_171110_a000	171029_171110	P12
155	38.6667	All	p12_171029_171110_171110_a000	171029_171110	P12
156	42.4658	All	p12_171029_171110_171110_a000	171029_171110	P12
157	36.2416	All	p12_171029_171110_171110_a000	171029_171110	P12
158	30.4878	All	p12_171029_171110_171110_a000	171029_171110	P12
159	36.1446	All	p12_171029_171110_171110_a000	171029_171110	P12
160	33.3333	All	p12_171029_171110_171110_a000	171029_171110	P12
161	62.5	All	p12_171029_171110_171110_a000	171029_171110	P12
162	58.9474	All	p12_171029_171110_171110_a000	171029_171110	P12
163	66.4062	All	p12_171029_171110_171110_a000	171029_171110	P12
164	51.3514	All	p12_171029_171110_171110_a000	171029_171110	P12
165	47	All	p12_171029_171110_171110_a000	171029_171110	P12
166	60.241	All	p12_171029_171110_171110_a000	171029_171110	P12
167	43.8017	All	p12_171029_171110_171110_a000	171029_171110	P12
168	65.7143	All	p12_171029_171110_171110_a000	171029_171110	P12
169	45.5696	All	p12_171029_171110_171110_a000	171029_171110	P12
170	59.4059	All	p12_171029_171110_171110_a000	171029_171110	P12
171	42.8571	All	p12_171029_171110_171110_a000	171029_171110	P12
172	27.4194	All	p12_171029_171110_171110_a000	171029_171110	P12
173	44.7761	All	p12_171029_171110_171110_a000	171029_171110	P12
174	36.9565	All	p12_171029_171110_171110_a000	171029_171110	P12
175	56	All	p12_190828_190909_190909_a000	190828_190909	P12
176	34.2857	All	p12_190828_190909_190909_a000	190828_190909	P12
177	68.2927	All	p12_190828_190909_190909_a000	190828_190909	P12
178	30	All	p12_190828_190909_190909_a000	190828_190909	P12
179	46.7742	All	p12_190828_190909_190909_a000	190828_190909	P12
180	42.8571	All	p12_190828_190909_190909_a000	190828_190909	P12
181	62.2642	All	p12_190828_190909_190909_a000	190828_190909	P12
182	32.8571	All	p12_190828_190909_190909_a000	190828_190909	P12
183	42.1687	All	p12_190828_190909_190909_a000	190828_190909	P12
184	60	All	p12_190828_190909_190909_a000	190828_190909	P12
185	25.3731	All	p12_190828_190909_190909_a000	190828_190909	P12
186	36.2319	All	p12_190828_190909_190909_a000	190828_190909	P12
187	23.0769	All	p12_190828_190909_190909_a000	190828_190909	P12
188	34.5455	All	p12_190828_190909_190909_a000	190828_190909	P12
189	51.1628	All	p12_190828_190909_190909_a000	190828_190909	P12
190	41.6667	All	p12_190828_190909_190909_a000	190828_190909	P12
191	36.2069	All	p12_190828_190909_190909_a000	190828_190909	P12
192	42.6966	All	p12_190828_190909_190909_a000	190828_190909	P12
193	40	All	p12_190828_190909_190909_a000	190828_190909	P12
194	29.5082	All	p12_190828_190909_190909_a000	190828_190909	P12
195	46.5517	All	p12_190828_190909_190909_a000	190828_190909	P12
196	52.1739	All	p12_190828_190909_190909_a000	190828_190909	P12
197	49.1525	All	p12_190828_190909_190909_a000	190828_190909	P12
198	31.3953	All	p12_190828_190909_190909_a000	190828_190909	P12
199	34.8837	All	p12_190828_190909_190909_a000	190828_190909	P12
200	54.1667	All	p12_190828_190909_190909_a000	190828_190909	P12
201	54.1667	All	p12_190828_190909_190909_a000	190828_190909	P12
202	57.1429	All	p12_190828_190909_190909_a000	190828_190909	P12
203	55.5556	All	p12_190828_190909_190909_a000	190828_190909	P12
204	32	All	p12_190828_190909_190909_a000	190828_190909	P12
205	48.8889	All	p12_190828_190909_190909_a000	190828_190909	P12
206	30	All	p12_190828_190909_190909_a000	190828_190909	P12
207	44.898	All	p12_190828_190909_190909_a000	190828_190909	P12
208	43.5484	All	p12_190828_190909_190909_a000	190828_190909	P12
209	34.5455	All	p12_190828_190909_190909_a000	190828_190909	P12
210	35	All	p12_190828_190909_190909_a000	190828_190909	P12
211	33.3333	All	p12_190828_190909_190909_a000	190828_190909	P12
212	35.6322	All	p12_190828_190909_190909_a000	190828_190909	P12
213	32.1429	All	p12_190828_190909_190909_a000	190828_190909	P12
214	26.087	All	p12_190828_190909_190909_a000	190828_190909	P12
215	58.3333	All	p12_190828_190909_190909_a000	190828_190909	P12
216	23.6842	All	p12_190828_190909_190909_a000	190828_190909	P12
217	26.087	All	p12_190828_190909_190909_a000	190828_190909	P12
218	29.8507	All	p12_190828_190909_190909_a000	190828_190909	P12
219	31.3433	All	p12_190828_190909_190909_a000	190828_190909	P12
220	57.7778	All	p12_190828_190909_190909_a000	190828_190909	P12
221	42.3729	All	p12_190828_190909_190909_a000	190828_190909	P12
222	22.2222	All	p12_190828_190909_190909_a000	190828_190909	P12
223	40.8163	All	p12_190828_190909_190909_a000	190828_190909	P12
224	31.1688	All	p12_190828_190909_190909_a000	190828_190909	P12
225	66.6667	All	p12_190828_190909_190909_a000	190828_190909	P12
226	35	All	p12_190828_190909_190909_a000	190828_190909	P12
227	44	All	p12_190828_190909_190909_a000	190828_190909	P12
228	26.087	All	p12_190828_190909_190909_a000	190828_190909	P12
229	31.1475	All	p12_190828_190909_190909_a000	190828_190909	P12
230	32.4675	All	p12_190828_190909_190909_a000	190828_190909	P12
231	45.1613	All	p12_190828_190909_190909_a000	190828_190909	P12
232	45.8333	All	p12_190828_190909_190909_a000	190828_190909	P12
233	48.5714	All	p12_190828_190909_190909_a000	190828_190909	P12
234	39.6226	All	p12_190828_190909_190909_a000	190828_190909	P12
235	40.4762	All	p12_190828_190909_190909_a000	190828_190909	P12
236	28.75	All	p12_190828_190909_190909_a000	190828_190909	P12
237	26.5625	All	p12_190828_190909_190909_a000	190828_190909	P12
238	27.907	All	p12_190828_190909_190909_a000	190828_190909	P12
239	34.8837	All	p12_190828_190909_190909_a000	190828_190909	P12
240	63.4146	All	p12_190828_190909_190909_a000	190828_190909	P12
241	42.1875	All	p12_190828_190909_190909_a000	190828_190909	P12
242	44.4444	All	p12_190828_190909_190909_a000	190828_190909	P12
243	32.1429	All	p12_190828_190909_190909_a000	190828_190909	P12
244	31.8182	All	p12_190828_190909_190909_a000	190828_190909	P12
245	48.9362	All	p12_190828_190909_190909_a000	190828_190909	P12
246	32.6531	All	p12_190828_190909_190909_a000	190828_190909	P12
247	27.7778	All	p12_190828_190909_190909_a000	190828_190909	P12
248	44.7368	All	p12_190828_190909_190909_a000	190828_190909	P12
249	43.4783	All	p12_190828_190909_190909_a000	190828_190909	P12
250	48.4375	All	p12_190828_190909_190909_a000	190828_190909	P12
251	25.3521	All	p12_190828_190909_190909_a000	190828_190909	P12
252	44.186	All	p12_190828_190909_190909_a000	190828_190909	P12
253	49.0566	All	p12_190828_190909_190909_a000	190828_190909	P12
254	65.3846	All	p12_190828_190909_190909_a000	190828_190909	P12
255	62.5	All	p12_190828_190909_190909_a000	190828_190909	P12
256	60.7843	All	p12_190828_190909_190909_a000	190828_190909	P12
257	73.8095	All	p12_190828_190909_190909_a000	190828_190909	P12
258	37.7049	All	p12_190828_190909_190909_a001	190828_190909	P12
259	50	All	p12_190828_190909_190909_a001	190828_190909	P12
260	39	All	p12_190828_190909_190909_a001	190828_190909	P12
261	36.9565	All	p12_190828_190909_190909_a001	190828_190909	P12
262	20.9877	All	p12_190828_190909_190909_a001	190828_190909	P12
263	59.6154	All	p12_190828_190909_190909_a001	190828_190909	P12
264	28.8288	All	p12_190828_190909_190909_a001	190828_190909	P12
265	25.3968	All	p12_190828_190909_190909_a001	190828_190909	P12
266	28.7671	All	p12_190828_190909_190909_a001	190828_190909	P12
267	23.7288	All	p12_190828_190909_190909_a001	190828_190909	P12
268	42.5	All	p12_190828_190909_190909_a001	190828_190909	P12
269	74.4681	All	p12_190828_190909_190909_a001	190828_190909	P12
270	39.6226	All	p12_190828_190909_190909_a001	190828_190909	P12
271	26.3889	All	p12_190828_190909_190909_a001	190828_190909	P12
272	65.1163	All	p12_190828_190909_190909_a001	190828_190909	P12
273	42.623	All	p12_190828_190909_190909_a001	190828_190909	P12
274	50	All	p12_190828_190909_190909_a001	190828_190909	P12
275	38.3721	All	p12_190828_190909_190909_a001	190828_190909	P12
276	40.4255	All	p12_190828_190909_190909_a001	190828_190909	P12
277	69.8113	All	p12_190828_190909_190909_a001	190828_190909	P12
278	68.0556	All	p12_190828_190909_190909_a001	190828_190909	P12
279	30.7692	All	p12_190828_190909_190909_a001	190828_190909	P12
280	62.5	All	p12_190828_190909_190909_a001	190828_190909	P12
281	27.0492	All	p12_190828_190909_190909_a001	190828_190909	P12
282	47.619	All	p12_190828_190909_190909_a001	190828_190909	P12
283	47.3684	All	p12_190828_190909_190909_a001	190828_190909	P12
284	60.9375	All	p12_190828_190909_190909_a001	190828_190909	P12
285	37.3333	All	p12_190828_190909_190909_a001	190828_190909	P12
286	35.4839	All	p12_190828_190909_190909_a001	190828_190909	P12
287	25.9259	All	p12_190828_190909_190909_a001	190828_190909	P12
288	29.4737	All	p12_190828_190909_190909_a001	190828_190909	P12
289	41.4634	All	p12_190828_190909_190909_a001	190828_190909	P12
290	31.5068	All	p12_190828_190909_190909_a001	190828_190909	P12
291	40	All	p12_190828_190909_190909_a001	190828_190909	P12
292	35.8974	All	p12_190828_190909_190909_a001	190828_190909	P12
293	26.5957	All	p12_190828_190909_190909_a001	190828_190909	P12
294	40.8163	All	p12_190828_190909_190909_a001	190828_190909	P12
295	46.8085	All	p12_190828_190909_190909_a001	190828_190909	P12
296	35.7143	All	p12_190828_190909_190909_a001	190828_190909	P12
297	36.3636	All	p12_190828_190909_190909_a001	190828_190909	P12
298	38.2979	All	p12_190828_190909_190909_a001	190828_190909	P12
299	41.3462	All	p12_190828_190909_190909_a001	190828_190909	P12
300	35.7143	All	p12_190828_190909_190909_a001	190828_190909	P12
301	71.6418	All	p12_190828_190909_190909_a001	190828_190909	P12
302	37.7193	All	p12_190828_190909_190909_a001	190828_190909	P12
303	55.7377	All	p12_190828_190909_190909_a001	190828_190909	P12
304	58.0645	All	p12_190828_190909_190909_a001	190828_190909	P12
305	50	All	p12_190828_190909_190909_a001	190828_190909	P12
306	55.9322	All	p12_190828_190909_190909_a001	190828_190909	P12
307	56.4103	All	p12_190828_190909_190909_a001	190828_190909	P12
308	50.7042	All	p12_190828_190909_190909_a001	190828_190909	P12
309	26.5823	All	p12_190828_190909_190909_a001	190828_190909	P12
310	71.1111	All	p12_190828_190909_190909_a001	190828_190909	P12
311	34.375	All	p12_190828_190909_190909_a001	190828_190909	P12
312	40	All	p12_190828_190909_190909_a001	190828_190909	P12
313	60	All	p12_190828_190909_190909_a001	190828_190909	P12
314	48.9362	All	p12_190828_190909_190909_a001	190828_190909	P12
315	42.029	All	p12_190828_190909_190909_a001	190828_190909	P12
316	46.0317	All	p12_190828_190909_190909_a001	190828_190909	P12
317	27.7778	All	p12_190828_190909_190909_a001	190828_190909	P12
318	53.8462	All	p12_190828_190909_190909_a001	190828_190909	P12
319	31.1475	All	p12_190828_190909_190909_a001	190828_190909	P12
320	34.9398	All	p12_190828_190909_190909_a001	190828_190909	P12
321	35.3659	All	p12_190828_190909_190909_a001	190828_190909	P12
322	50	All	p12_190828_190909_190909_a001	190828_190909	P12
323	26.7327	All	p12_190828_190909_190909_a001	190828_190909	P12
324	34.9206	All	p12_190828_190909_190909_a001	190828_190909	P12
325	59.1304	All	p12_190828_190909_190909_a001	190828_190909	P12
326	45.122	All	p12_190911_190923_190923_a001	190911_190923	P12
327	46.875	All	p12_190911_190923_190923_a001	190911_190923	P12
328	42.8571	All	p12_190911_190923_190923_a001	190911_190923	P12
329	59.5745	All	p12_190911_190923_190923_a001	190911_190923	P12
330	53.3333	All	p12_190911_190923_190923_a001	190911_190923	P12
331	52.809	All	p12_190911_190923_190923_a001	190911_190923	P12
332	56.3107	All	p12_190911_190923_190923_a001	190911_190923	P12
333	65.8537	All	p12_190911_190923_190923_a001	190911_190923	P12
334	39.1304	All	p12_190911_190923_190923_a001	190911_190923	P12
335	56.7164	All	p12_190911_190923_190923_a001	190911_190923	P12
336	43	All	p12_190911_190923_190923_a001	190911_190923	P12
337	40.5405	All	p12_190911_190923_190923_a001	190911_190923	P12
338	44.1558	All	p12_190911_190923_190923_a001	190911_190923	P12
339	53.7313	All	p12_190911_190923_190923_a001	190911_190923	P12
340	38.3562	All	p12_190911_190923_190923_a001	190911_190923	P12
341	63.0435	All	p12_190911_190923_190923_a001	190911_190923	P12
342	35.2941	All	p12_190911_190923_190923_a001	190911_190923	P12
343	41.791	All	p12_190911_190923_190923_a001	190911_190923	P12
344	37.9747	All	p12_190911_190923_190923_a001	190911_190923	P12
345	21.9512	All	p12_190911_190923_190923_a001	190911_190923	P12
346	41.3793	All	p12_190911_190923_190923_a001	190911_190923	P12
347	46.5116	All	p12_190911_190923_190923_a001	190911_190923	P12
348	50.9434	All	p12_190911_190923_190923_a001	190911_190923	P12
349	40	All	p12_190911_190923_190923_a001	190911_190923	P12
350	53.125	All	p12_190911_190923_190923_a001	190911_190923	P12
351	39.4737	All	p12_190911_190923_190923_a001	190911_190923	P12
352	29.5775	All	p12_190911_190923_190923_a001	190911_190923	P12
353	44.4444	All	p12_190911_190923_190923_a001	190911_190923	P12
354	51.7647	All	p12_190911_190923_190923_a001	190911_190923	P12
355	48.6111	All	p12_190911_190923_190923_a001	190911_190923	P12
356	38.6667	All	p12_190911_190923_190923_a001	190911_190923	P12
357	43.2836	All	p12_190911_190923_190923_a001	190911_190923	P12
358	52.2388	All	p12_190911_190923_190923_a001	190911_190923	P12
359	51.4286	All	p12_190911_190923_190923_a001	190911_190923	P12
360	49.2308	All	p12_190911_190923_190923_a001	190911_190923	P12
361	34.8485	All	p12_190911_190923_190923_a001	190911_190923	P12
362	28.8889	All	p12_190911_190923_190923_a001	190911_190923	P12
363	40.2299	All	p12_190911_190923_190923_a001	190911_190923	P12
364	34.4828	All	p12_190911_190923_190923_a001	190911_190923	P12
365	50.6667	All	p12_190911_190923_190923_a001	190911_190923	P12
366	35.7143	All	p12_190911_190923_190923_a001	190911_190923	P12
367	30.7692	All	p12_190911_190923_190923_a001	190911_190923	P12
368	51.9481	All	p12_190911_190923_190923_a001	190911_190923	P12
369	34.5455	All	p12_190911_190923_190923_a001	190911_190923	P12
370	42.3729	All	p12_190911_190923_190923_a001	190911_190923	P12
371	44.5783	All	p12_190911_190923_190923_a001	190911_190923	P12
372	81.25	All	p12_190911_190923_190923_a001	190911_190923	P12
373	44.1558	All	p12_190911_190923_190923_a001	190911_190923	P12
374	30.8824	All	p12_190911_190923_190923_a001	190911_190923	P12
375	26.1538	All	p12_190911_190923_190923_a001	190911_190923	P12
376	60.4651	All	p12_190911_190923_190923_a001	190911_190923	P12
377	36.6667	All	p12_190911_190923_190923_a001	190911_190923	P12
378	26.9663	All	p12_190911_190923_190923_a001	190911_190923	P12
379	38.7097	All	p12_190911_190923_190923_a001	190911_190923	P12
380	42.6667	All	p12_190911_190923_190923_a001	190911_190923	P12
381	25.6098	All	p12_190911_190923_190923_a001	190911_190923	P12
382	49.505	All	p12_190911_190923_190923_a001	190911_190923	P12
383	27.2727	All	p12_190911_190923_190923_a001	190911_190923	P12
384	43.2432	All	p12_190911_190923_190923_a001	190911_190923	P12
385	31.3433	All	p12_190911_190923_190923_a001	190911_190923	P12
386	30.8824	All	p12_190911_190923_190923_a001	190911_190923	P12
387	42.3529	All	p12_190911_190923_190923_a001	190911_190923	P12
388	28.3784	All	p12_190911_190923_190923_a001	190911_190923	P12
389	44	All	p12_190911_190923_190923_a001	190911_190923	P12
390	36.9048	All	p12_190911_190923_190923_a001	190911_190923	P12
391	36.3636	All	p12_190911_190923_190923_a001	190911_190923	P12
392	34.2105	All	p12_190911_190923_190923_a001	190911_190923	P12
393	35.5263	All	p12_190911_190923_190923_a001	190911_190923	P12
394	66.6667	All	p12_190911_190923_190923_a001	190911_190923	P12
395	73.2673	All	p12_190911_190923_190923_a001	190911_190923	P12
396	44.4444	All	p12_190911_190923_190923_a001	190911_190923	P12
397	36.1446	All	p12_190911_190923_190923_a001	190911_190923	P12
398	38.9831	All	p12_190911_190923_190923_a001	190911_190923	P12
399	32.2581	All	p12_190911_190923_190923_a001	190911_190923	P12
400	32.9787	All	p12_190911_190923_190923_a001	190911_190923	P12
401	66.1017	All	p12_190911_190923_190923_a001	190911_190923	P12
402	43.2432	All	p12_190911_190923_190923_a001	190911_190923	P12
403	44.5545	All	p12_190911_190923_190923_a001	190911_190923	P12
404	44.086	All	p12_190911_190923_190923_a001	190911_190923	P12
405	48.7805	All	p12_190911_190923_190923_a001	190911_190923	P12
406	49.3671	All	p12_190911_190923_190923_a001	190911_190923	P12
407	34.0659	All	p12_190911_190923_190923_a001	190911_190923	P12
408	58.9744	All	p12_190911_190923_190923_a001	190911_190923	P12
409	30.4348	All	p12_190911_190923_190923_a001	190911_190923	P12
410	40	All	p12_190911_190923_190923_a001	190911_190923	P12
411	34.4086	All	p12_190911_190923_190923_a001	190911_190923	P12
412	41.6667	All	p12_190911_190923_190923_a001	190911_190923	P12
413	46.5116	All	p12_190911_190923_190923_a001	190911_190923	P12
414	29.1667	All	p12_190911_190923_190923_a001	190911_190923	P12
415	62.6506	All	p12_190911_190923_190923_a001	190911_190923	P12
416	31.7073	All	p12_190911_190923_190923_a001	190911_190923	P12
417	39.759	All	p12_190911_190923_190923_a001	190911_190923	P12
418	33.75	All	p12_190911_190923_190923_a001	190911_190923	P12
419	36.3636	All	p12_190911_190923_190923_a001	190911_190923	P12
420	30.5556	All	p12_190911_190923_190923_a001	190911_190923	P12
421	30.5556	All	p12_190911_190923_190923_a001	190911_190923	P12
422	40.9091	All	p12_190911_190923_190923_a001	190911_190923	P12
423	36.3636	All	p12_190921_191003_191003_a001	190921_191003	P12
424	50	All	p12_190921_191003_191003_a001	190921_191003	P12
425	25	All	p12_190921_191003_191003_a001	190921_191003	P12
426	18.75	All	p12_190921_191003_191003_a001	190921_191003	P12
427	28.5714	All	p12_190921_191003_191003_a001	190921_191003	P12
428	51.2821	All	p12_190921_191003_191003_a001	190921_191003	P12
429	41.9355	All	p12_190921_191003_191003_a001	190921_191003	P12
430	34.1463	All	p12_190921_191003_191003_a001	190921_191003	P12
431	37.5	All	p12_190921_191003_191003_a001	190921_191003	P12
432	33.3333	All	p12_190921_191003_191003_a001	190921_191003	P12
433	50	All	p12_190921_191003_191003_a001	190921_191003	P12
434	53.4884	All	p12_190921_191003_191003_a001	190921_191003	P12
435	54.8387	All	p12_190921_191003_191003_a001	190921_191003	P12
436	46.6667	All	p12_190921_191003_191003_a001	190921_191003	P12
437	37.8378	All	p12_190921_191003_191003_a001	190921_191003	P12
438	42.8571	All	p12_190921_191003_191003_a001	190921_191003	P12
439	40.4255	All	p12_190921_191003_191003_a001	190921_191003	P12
440	18.5185	All	p12_190921_191003_191003_a001	190921_191003	P12
441	37.5	All	p12_190921_191003_191003_a001	190921_191003	P12
442	55.2632	All	p12_190921_191003_191003_a001	190921_191003	P12
443	35.1351	All	p12_190921_191003_191003_a001	190921_191003	P12
444	41.4634	All	p12_190921_191003_191003_a001	190921_191003	P12
445	21.6216	All	p12_190921_191003_191003_a001	190921_191003	P12
446	54.8387	All	p12_190921_191003_191003_a001	190921_191003	P12
447	53.8462	All	p12_190921_191003_191003_a001	190921_191003	P12
448	51.8519	All	p12_190921_191003_191003_a001	190921_191003	P12
449	27.907	All	p12_190921_191003_191003_a001	190921_191003	P12
450	45.4545	All	p12_190921_191003_191003_a001	190921_191003	P12
451	38.2353	All	p12_190921_191003_191003_a001	190921_191003	P12
452	34.8837	All	p12_190921_191003_191003_a001	190921_191003	P12
453	46.3415	All	p12_190921_191003_191003_a001	190921_191003	P12
454	33.3333	All	p12_190921_191003_191003_a001	190921_191003	P12
455	46.3415	All	p12_190921_191003_191003_a001	190921_191003	P12
456	45.283	All	p12_190921_191003_191003_a001	190921_191003	P12
457	44.6809	All	p12_190921_191003_191003_a001	190921_191003	P12
458	40.4255	All	p12_190921_191003_191003_a001	190921_191003	P12
459	32.6531	All	p12_190921_191003_191003_a001	190921_191003	P12
460	16.129	All	p12_190921_191003_191003_a001	190921_191003	P12
461	53.8462	All	p12_190921_191003_191003_a001	190921_191003	P12
462	86.9565	All	p12_190921_191003_191003_a001	190921_191003	P12
463	25.7143	All	p12_190921_191003_191003_a001	190921_191003	P12
464	52.6316	All	p12_190921_191003_191003_a001	190921_191003	P12
465	54.902	All	p12_190921_191003_191003_a001	190921_191003	P12
466	50	All	p12_190921_191003_191003_a001	190921_191003	P12
467	31.25	All	p12_190921_191003_191003_a001	190921_191003	P12
468	48.0769	All	p12_190921_191003_191003_a001	190921_191003	P12
469	60	All	p12_190921_191003_191003_a001	190921_191003	P12
470	21.9512	All	p12_190921_191003_191003_a001	190921_191003	P12
471	54.5455	All	p12_190921_191003_191003_a001	190921_191003	P12
472	26.6667	All	p12_190921_191003_191003_a001	190921_191003	P12
473	24.5283	All	p12_190921_191003_191003_a001	190921_191003	P12
474	56.25	All	p12_190921_191003_191003_a001	190921_191003	P12
475	25	All	p12_190921_191003_191003_a001	190921_191003	P12
476	50.9434	All	p12_190921_191003_191003_a001	190921_191003	P12
477	52.6316	All	p12_190921_191003_191003_a001	190921_191003	P12
478	40.5405	All	p12_190921_191003_191003_a001	190921_191003	P12
479	41.0256	All	p12_190921_191003_191003_a001	190921_191003	P12
480	48.4848	All	p12_190921_191003_191003_a001	190921_191003	P12
481	50	All	p12_190921_191003_191003_a001	190921_191003	P12
482	63.4146	All	p12_190921_191003_191003_a001	190921_191003	P12
483	63.2353	All	p12_190921_191003_191003_a001	190921_191003	P12
484	30.3371	All	p12_190921_191003_191003_a001	190921_191003	P12
485	78.8732	All	p12_190921_191003_191003_a001	190921_191003	P12
486	37.5	All	p12_190921_191003_191003_a001	190921_191003	P12
487	50	All	p12_190921_191003_191003_a001	190921_191003	P12
488	35.1064	All	p12_191122_191204_191204_a000	191122_191204	P12
489	33.6634	All	p12_191122_191204_191204_a000	191122_191204	P12
490	43.0556	All	p12_191122_191204_191204_a000	191122_191204	P12
491	32.3944	All	p12_191122_191204_191204_a000	191122_191204	P12
492	24.1071	All	p12_191122_191204_191204_a000	191122_191204	P12
493	39.0244	All	p12_191122_191204_191204_a000	191122_191204	P12
494	22.8261	All	p12_191122_191204_191204_a000	191122_191204	P12
495	23.6111	All	p12_191122_191204_191204_a000	191122_191204	P12
496	32.4561	All	p12_191122_191204_191204_a000	191122_191204	P12
497	31.3953	All	p12_191122_191204_191204_a000	191122_191204	P12
498	23.5294	All	p12_191122_191204_191204_a000	191122_191204	P12
499	45.7447	All	p12_191122_191204_191204_a000	191122_191204	P12
500	40	All	p12_191122_191204_191204_a000	191122_191204	P12
501	33.0579	All	p12_191122_191204_191204_a000	191122_191204	P12
502	63.4921	All	p12_191122_191204_191204_a000	191122_191204	P12
503	34.1772	All	p12_191122_191204_191204_a000	191122_191204	P12
504	31.3953	All	p12_191122_191204_191204_a000	191122_191204	P12
505	36.7347	All	p12_191122_191204_191204_a000	191122_191204	P12
506	40.9836	All	p12_191122_191204_191204_a000	191122_191204	P12
507	32.6087	All	p12_191122_191204_191204_a000	191122_191204	P12
508	45.7143	All	p12_191122_191204_191204_a000	191122_191204	P12
509	59.7222	All	p12_191122_191204_191204_a000	191122_191204	P12
510	37.931	All	p12_191122_191204_191204_a000	191122_191204	P12
511	45	All	p12_191122_191204_191204_a000	191122_191204	P12
512	56.3218	All	p12_191122_191204_191204_a000	191122_191204	P12
513	66.1017	All	p12_191122_191204_191204_a000	191122_191204	P12
514	25	All	p12_191122_191204_191204_a000	191122_191204	P12
515	41.8919	All	p12_191122_191204_191204_a000	191122_191204	P12
516	57.5	All	p12_191122_191204_191204_a000	191122_191204	P12
517	31.4961	All	p12_191122_191204_191204_a000	191122_191204	P12
518	11.828	All	p12_191122_191204_191204_a000	191122_191204	P12
519	21.1111	All	p12_191122_191204_191204_a000	191122_191204	P12
520	43.956	All	p12_191122_191204_191204_a000	191122_191204	P12
521	28.2051	All	p12_191122_191204_191204_a000	191122_191204	P12
522	32.6087	All	p12_191122_191204_191204_a000	191122_191204	P12
523	15.8333	All	p12_191122_191204_191204_a000	191122_191204	P12
524	26.8116	All	p12_191122_191204_191204_a000	191122_191204	P12
525	25.8929	All	p12_191122_191204_191204_a000	191122_191204	P12
526	25.8824	All	p12_191122_191204_191204_a000	191122_191204	P12
527	31.4815	All	p12_191122_191204_191204_a000	191122_191204	P12
528	46	All	p12_191122_191204_191204_a000	191122_191204	P12
529	40.4255	All	p12_191122_191204_191204_a000	191122_191204	P12
530	28	All	p12_191122_191204_191204_a000	191122_191204	P12
531	36.1702	All	p12_191122_191204_191204_a000	191122_191204	P12
532	29.3651	All	p12_191122_191204_191204_a000	191122_191204	P12
533	29.6296	All	p12_191122_191204_191204_a000	191122_191204	P12
534	29.0598	All	p12_191122_191204_191204_a000	191122_191204	P12
535	43.5294	All	p12_191122_191204_191204_a000	191122_191204	P12
536	35.7798	All	p12_191122_191204_191204_a000	191122_191204	P12
537	38.2716	All	p12_191122_191204_191204_a000	191122_191204	P12
538	25	All	p12_191122_191204_191204_a000	191122_191204	P12
539	44	All	p12_191122_191204_191204_a000	191122_191204	P12
540	50.9804	All	p12_191122_191204_191204_a000	191122_191204	P12
541	47.2727	All	p12_191122_191204_191204_a000	191122_191204	P12
542	44.898	All	p12_191122_191204_191204_a001	191122_191204	P12
543	45.7447	All	p12_191122_191204_191204_a001	191122_191204	P12
544	45.5696	All	p12_191122_191204_191204_a001	191122_191204	P12
545	40.4255	All	p12_191122_191204_191204_a001	191122_191204	P12
546	45.679	All	p12_191122_191204_191204_a001	191122_191204	P12
547	44.4444	All	p12_191122_191204_191204_a001	191122_191204	P12
548	49.4505	All	p12_191122_191204_191204_a001	191122_191204	P12
549	21.4286	All	p12_191122_191204_191204_a001	191122_191204	P12
550	42.8571	All	p12_191122_191204_191204_a001	191122_191204	P12
551	39.726	All	p12_191122_191204_191204_a001	191122_191204	P12
552	57.1429	All	p12_191122_191204_191204_a001	191122_191204	P12
553	50	All	p12_191122_191204_191204_a001	191122_191204	P12
554	32.5301	All	p12_191122_191204_191204_a001	191122_191204	P12
555	61.3208	All	p12_191122_191204_191204_a001	191122_191204	P12
556	44.5652	All	p12_191122_191204_191204_a001	191122_191204	P12
557	31.1111	All	p12_191122_191204_191204_a001	191122_191204	P12
558	46.0317	All	p12_191122_191204_191204_a001	191122_191204	P12
559	41.5094	All	p12_191122_191204_191204_a001	191122_191204	P12
560	31.3253	All	p12_191122_191204_191204_a001	191122_191204	P12
561	39.3443	All	p12_191122_191204_191204_a001	191122_191204	P12
562	39.4231	All	p12_191122_191204_191204_a001	191122_191204	P12
563	70.4918	All	p12_191122_191204_191204_a001	191122_191204	P12
564	39.3258	All	p12_191122_191204_191204_a001	191122_191204	P12
565	34.4262	All	p12_191122_191204_191204_a001	191122_191204	P12
566	51.3889	All	p12_191122_191204_191204_a001	191122_191204	P12
567	57.6923	All	p12_191122_191204_191204_a001	191122_191204	P12
568	68	All	p12_191122_191204_191204_a001	191122_191204	P12
569	34.4828	All	p12_191122_191204_191204_a001	191122_191204	P12
570	42.6829	All	p12_191122_191204_191204_a001	191122_191204	P12
571	48.6486	All	p12_191122_191204_191204_a001	191122_191204	P12
572	43.038	All	p12_191122_191204_191204_a001	191122_191204	P12
573	35.6589	All	p12_191122_191204_191204_a001	191122_191204	P12
574	54.1176	All	p12_191122_191204_191204_a001	191122_191204	P12
575	41.0256	All	p12_191122_191204_191204_a001	191122_191204	P12
576	55.4054	All	p12_191122_191204_191204_a001	191122_191204	P12
577	44.3038	All	p12_191122_191204_191204_a001	191122_191204	P12
578	56.3107	All	p12_191122_191204_191204_a001	191122_191204	P12
579	63.4146	All	p12_191122_191204_191204_a001	191122_191204	P12
580	61.2245	All	p12_191122_191204_191204_a001	191122_191204	P12
581	53.9474	All	p12_191122_191204_191204_a001	191122_191204	P12
582	69.1358	All	p12_191122_191204_191204_a001	191122_191204	P12
583	53.9326	All	p12_191122_191204_191204_a001	191122_191204	P12
584	39.7849	All	p12_191122_191204_191204_a001	191122_191204	P12
585	26.7857	All	p12_191122_191204_191204_a001	191122_191204	P12
586	29.3578	All	p12_191122_191204_191204_a001	191122_191204	P12
587	38.843	All	p12_191122_191204_191204_a001	191122_191204	P12
588	50	All	p12_191122_191204_191204_a001	191122_191204	P12
589	43.3333	All	p12_191122_191204_191204_a001	191122_191204	P12
590	28.0992	All	p12_191122_191204_191204_a001	191122_191204	P12
591	32.6087	All	p12_191122_191204_191204_a001	191122_191204	P12
592	27.1739	All	p12_191122_191204_191204_a001	191122_191204	P12
593	36.1111	All	p12_191122_191204_191204_a001	191122_191204	P12
594	44.4444	All	p12_191122_191204_191204_a001	191122_191204	P12
595	57.3913	All	p12_191122_191204_191204_a001	191122_191204	P12
596	36.2745	All	p12_191122_191204_191204_a001	191122_191204	P12
597	43.5484	All	p12_191122_191204_191204_a001	191122_191204	P12
598	56.5217	All	p12_191122_191204_191204_a001	191122_191204	P12
599	42.029	All	p12_191122_191204_191204_a001	191122_191204	P12
600	40.2062	All	p12_191122_191204_191204_a001	191122_191204	P12
601	30.4348	All	p12_191122_191204_191204_a001	191122_191204	P12
602	30.1205	All	p12_191122_191204_191204_a001	191122_191204	P12
603	35.1351	All	p12_191122_191204_191204_a001	191122_191204	P12
604	28.5714	All	p12_191122_191204_191204_a001	191122_191204	P12
605	39	All	p12_191122_191204_191204_a001	191122_191204	P12
606	43.8202	All	p12_191122_191204_191204_a001	191122_191204	P12
607	31.3253	All	p12_191122_191204_191204_a001	191122_191204	P12
608	44.3299	All	p12_191122_191204_191204_a001	191122_191204	P12
609	53.0612	All	p12_191122_191204_191204_a001	191122_191204	P12
610	43.75	All	p12_191122_191204_191204_a001	191122_191204	P12
611	40	All	p12_191122_191204_191204_a001	191122_191204	P12
612	58.9286	All	p12_191122_191204_191204_a001	191122_191204	P12
613	38.6667	All	p12_191122_191204_191204_a001	191122_191204	P12
614	37.5	All	p12_191122_191204_191204_a001	191122_191204	P12
615	32.6087	All	p12_191122_191204_191204_a001	191122_191204	P12
616	45.8333	All	p12_191122_191204_191204_a001	191122_191204	P12
617	42.3913	All	p12_191122_191204_191204_a001	191122_191204	P12
618	23.5294	All	p12_191122_191204_191204_a001	191122_191204	P12
619	45.8333	All	p12_191122_191204_191204_a001	191122_191204	P12
620	32.7103	All	p12_191122_191204_191204_a001	191122_191204	P12
621	61.6667	All	p12_191122_191204_191204_a001	191122_191204	P12
622	32.0388	All	p12_191122_191204_191204_a001	191122_191204	P12
623	58.427	All	p12_191122_191204_191204_a001	191122_191204	P12
624	41.8605	All	p12_191122_191204_191204_a001	191122_191204	P12
625	37.1795	All	p12_191122_191204_191204_a001	191122_191204	P12
626	37.2093	All	p12_191122_191204_191204_a001	191122_191204	P12
627	20.8696	All	p12_191122_191204_191204_a001	191122_191204	P12
628	34.8684	All	p12_191122_191204_191204_a001	191122_191204	P12
629	28.866	All	p12_191122_191204_191204_a001	191122_191204	P12
630	47.2222	All	p12_191122_191204_191204_a001	191122_191204	P12
631	30.6931	All	p12_191122_191204_191204_a001	191122_191204	P12
632	34.1463	All	p12_191122_191204_191204_a001	191122_191204	P12
633	75	All	p5_190320_190325_190325_a000	190320_190325	P5
634	78.5714	All	p5_190320_190325_190325_a000	190320_190325	P5
635	58.75	All	p5_190320_190325_190325_a000	190320_190325	P5
636	81.8182	All	p5_190320_190325_190325_a000	190320_190325	P5
637	90	All	p5_190320_190325_190325_a000	190320_190325	P5
638	76.1905	All	p5_190320_190325_190325_a000	190320_190325	P5
639	75.6757	All	p5_190320_190325_190325_a000	190320_190325	P5
640	87.0968	All	p5_190320_190325_190325_a000	190320_190325	P5
641	92	All	p5_190320_190325_190325_a000	190320_190325	P5
642	83.0769	All	p5_190320_190325_190325_a000	190320_190325	P5
643	91.3043	All	p5_190320_190325_190325_a000	190320_190325	P5
644	90	All	p5_190320_190325_190325_a000	190320_190325	P5
645	72.7273	All	p5_190320_190325_190325_a000	190320_190325	P5
646	75	All	p5_190320_190325_190325_a000	190320_190325	P5
647	54.5455	All	p5_190320_190325_190325_a000	190320_190325	P5
648	87.5	All	p5_190320_190325_190325_a000	190320_190325	P5
649	64	All	p5_190320_190325_190325_a000	190320_190325	P5
650	71.0526	All	p5_190320_190325_190325_a000	190320_190325	P5
651	76.4706	All	p5_190320_190325_190325_a000	190320_190325	P5
652	48.1481	All	p5_190320_190325_190325_a000	190320_190325	P5
653	63.1579	All	p5_190320_190325_190325_a000	190320_190325	P5
654	69.2308	All	p5_190320_190325_190325_a000	190320_190325	P5
655	77.7778	All	p5_190320_190325_190325_a000	190320_190325	P5
656	92.8571	All	p5_190320_190325_190325_a000	190320_190325	P5
657	88	All	p5_190320_190325_190325_a000	190320_190325	P5
658	70.8333	All	p5_190320_190325_190325_a000	190320_190325	P5
659	56.0976	All	p5_190320_190325_190325_a000	190320_190325	P5
660	52	All	p5_190320_190325_190325_a000	190320_190325	P5
661	50.7042	All	p5_190320_190325_190325_a000	190320_190325	P5
662	91.6667	All	p5_190320_190325_190325_a000	190320_190325	P5
663	80.9524	All	p5_190320_190325_190325_a000	190320_190325	P5
664	95.8333	All	p5_190320_190325_190325_a000	190320_190325	P5
665	95	All	p5_190320_190325_190325_a000	190320_190325	P5
666	80.9524	All	p5_190320_190325_190325_a000	190320_190325	P5
667	64.2857	All	p5_190320_190325_190325_a000	190320_190325	P5
668	92.5926	All	p5_190320_190325_190325_a000	190320_190325	P5
669	76.9231	All	p5_190320_190325_190325_a000	190320_190325	P5
670	94.7368	All	p5_190320_190325_190325_a000	190320_190325	P5
671	61.4035	All	p5_190320_190325_190325_a000	190320_190325	P5
672	83.3333	All	p5_190320_190325_190325_a000	190320_190325	P5
673	70	All	p5_190320_190325_190325_a000	190320_190325	P5
674	85.7143	All	p5_190320_190325_190325_a000	190320_190325	P5
675	85.7143	All	p5_190320_190325_190325_a000	190320_190325	P5
676	84.2105	All	p5_190320_190325_190325_a000	190320_190325	P5
677	74.4186	All	p5_190320_190325_190325_a000	190320_190325	P5
678	84	All	p5_190320_190325_190325_a000	190320_190325	P5
679	100	All	p5_190320_190325_190325_a000	190320_190325	P5
680	93.75	All	p5_190320_190325_190325_a000	190320_190325	P5
681	82.6087	All	p5_190320_190325_190325_a000	190320_190325	P5
682	63.6364	All	p5_190320_190325_190325_a000	190320_190325	P5
683	80	All	p5_190320_190325_190325_a000	190320_190325	P5
684	81.25	All	p5_190320_190325_190325_a000	190320_190325	P5
685	73.3333	All	p5_190320_190325_190325_a000	190320_190325	P5
686	76	All	p5_190320_190325_190325_a000	190320_190325	P5
687	96	All	p5_190320_190325_190325_a000	190320_190325	P5
688	86.3636	All	p5_190320_190325_190325_a000	190320_190325	P5
689	71.875	All	p5_190320_190325_190325_a000	190320_190325	P5
690	88	All	p5_190320_190325_190325_a000	190320_190325	P5
691	56.25	All	p5_190320_190325_190325_a000	190320_190325	P5
692	69.6429	All	p5_190320_190325_190325_a000	190320_190325	P5
693	77.2727	All	p5_190320_190325_190325_a000	190320_190325	P5
694	100	All	p5_190320_190325_190325_a000	190320_190325	P5
695	93.3333	All	p5_190320_190325_190325_a000	190320_190325	P5
696	72.4138	All	p5_190320_190325_190325_a000	190320_190325	P5
697	80.9524	All	p5_190320_190325_190325_a000	190320_190325	P5
698	83.3333	All	p5_190320_190325_190325_a000	190320_190325	P5
699	80	All	p5_190320_190325_190325_a000	190320_190325	P5
700	72.2222	All	p5_190320_190325_190325_a000	190320_190325	P5
701	73.3333	All	p5_190320_190325_190325_a000	190320_190325	P5
702	81.25	All	p5_190320_190325_190325_a000	190320_190325	P5
703	90.4762	All	p5_190320_190325_190325_a000	190320_190325	P5
704	88.5714	All	p5_190320_190325_190325_a000	190320_190325	P5
705	56.7568	All	p5_190320_190325_190325_a000	190320_190325	P5
706	51.4286	All	p5_190320_190325_190325_a000	190320_190325	P5
707	70.8333	All	p5_190320_190325_190325_a000	190320_190325	P5
708	67.8571	All	p5_190320_190325_190325_a000	190320_190325	P5
709	86.6667	All	p5_190320_190325_190325_a000	190320_190325	P5
710	93.3333	All	p5_190320_190325_190325_a000	190320_190325	P5
711	68.75	All	p5_190320_190325_190325_a000	190320_190325	P5
712	66.6667	All	p5_190320_190325_190325_a000	190320_190325	P5
713	57.6923	All	p5_190320_190325_190325_a000	190320_190325	P5
714	90.9091	All	p5_190320_190325_190325_a000	190320_190325	P5
715	100	All	p5_190320_190325_190325_a000	190320_190325	P5
716	73.3333	All	p5_190320_190325_190325_a000	190320_190325	P5
717	71.4286	All	p5_190320_190325_190325_a000	190320_190325	P5
718	61.5385	All	p5_190320_190325_190325_a000	190320_190325	P5
719	78.0488	All	p5_190320_190325_190325_a000	190320_190325	P5
720	89.7959	All	p5_190320_190325_190325_a000	190320_190325	P5
721	63.7681	All	p5_190320_190325_190325_a000	190320_190325	P5
722	85.7143	All	p5_190320_190325_190325_a000	190320_190325	P5
723	75	All	p5_190320_190325_190325_a000	190320_190325	P5
724	94.4444	All	p5_190320_190325_190325_a000	190320_190325	P5
725	83.3333	All	p5_190320_190325_190325_a000	190320_190325	P5
726	38.4615	All	p5_190320_190325_190325_a000	190320_190325	P5
727	62.5	All	p5_190320_190325_190325_a000	190320_190325	P5
728	70.2703	All	p5_190320_190325_190325_a000	190320_190325	P5
729	100	All	p5_190320_190325_190325_a000	190320_190325	P5
730	83.3333	All	p5_190320_190325_190325_a000	190320_190325	P5
731	82.1429	All	p5_190320_190325_190325_a000	190320_190325	P5
732	77.5	All	p5_190320_190325_190325_a000	190320_190325	P5
733	87.5	All	p5_190320_190325_190325_a000	190320_190325	P5
734	73.0769	All	p5_190320_190325_190325_a000	190320_190325	P5
735	50	All	p5_190320_190325_190325_a000	190320_190325	P5
736	95	All	p5_190320_190325_190325_a000	190320_190325	P5
737	51.4706	All	p5_190320_190325_190325_a000	190320_190325	P5
738	94.1176	All	p5_190320_190325_190325_a000	190320_190325	P5
739	64.8148	All	p5_190320_190325_190325_a000	190320_190325	P5
740	92.3077	All	p5_190320_190325_190325_a000	190320_190325	P5
741	66.6667	All	p5_190320_190325_190325_a000	190320_190325	P5
742	75.5556	All	p5_190320_190325_190325_a000	190320_190325	P5
743	54.8387	All	p5_190320_190325_190325_a000	190320_190325	P5
744	75.3425	All	p5_190320_190325_190325_a000	190320_190325	P5
745	74.359	All	p5_190320_190325_190325_a000	190320_190325	P5
746	68.5185	All	p5_190320_190325_190325_a000	190320_190325	P5
747	85.7143	All	p5_190320_190325_190325_a000	190320_190325	P5
748	83.3333	All	p5_190320_190325_190325_a001	190320_190325	P5
749	78.5714	All	p5_190320_190325_190325_a001	190320_190325	P5
750	76.3158	All	p5_190320_190325_190325_a001	190320_190325	P5
751	75	All	p5_190320_190325_190325_a001	190320_190325	P5
752	91.6667	All	p5_190320_190325_190325_a001	190320_190325	P5
753	94.7368	All	p5_190320_190325_190325_a001	190320_190325	P5
754	76.9231	All	p5_190320_190325_190325_a001	190320_190325	P5
755	96.7742	All	p5_190320_190325_190325_a001	190320_190325	P5
756	96.6667	All	p5_190320_190325_190325_a001	190320_190325	P5
757	96.1538	All	p5_190320_190325_190325_a001	190320_190325	P5
758	100	All	p5_190320_190325_190325_a001	190320_190325	P5
759	91.6667	All	p5_190320_190325_190325_a001	190320_190325	P5
760	100	All	p5_190320_190325_190325_a001	190320_190325	P5
761	63.0435	All	p5_190320_190325_190325_a001	190320_190325	P5
762	85.7143	All	p5_190320_190325_190325_a001	190320_190325	P5
763	65.8537	All	p5_190320_190325_190325_a001	190320_190325	P5
764	100	All	p5_190320_190325_190325_a001	190320_190325	P5
765	100	All	p5_190320_190325_190325_a001	190320_190325	P5
766	78.5714	All	p5_190320_190325_190325_a001	190320_190325	P5
767	96	All	p5_190320_190325_190325_a001	190320_190325	P5
768	83.7838	All	p5_190320_190325_190325_a001	190320_190325	P5
769	100	All	p5_190320_190325_190325_a001	190320_190325	P5
770	94.5946	All	p5_190320_190325_190325_a001	190320_190325	P5
771	85.1852	All	p5_190320_190325_190325_a001	190320_190325	P5
772	78.5047	All	p5_190320_190325_190325_a001	190320_190325	P5
773	91.3043	All	p5_190320_190325_190325_a001	190320_190325	P5
774	88.3721	All	p5_190320_190325_190325_a001	190320_190325	P5
775	96.5517	All	p5_190320_190325_190325_a001	190320_190325	P5
776	88.8889	All	p5_190320_190325_190325_a001	190320_190325	P5
777	89.1892	All	p5_190320_190325_190325_a001	190320_190325	P5
778	14.2857	All	p5_190320_190325_190325_a001	190320_190325	P5
779	73.0769	All	p5_190320_190325_190325_a001	190320_190325	P5
780	76.7857	All	p5_190320_190325_190325_a001	190320_190325	P5
781	88.4615	All	p5_190320_190325_190325_a001	190320_190325	P5
782	85.7143	All	p5_190320_190325_190325_a001	190320_190325	P5
783	94.4444	All	p5_190320_190325_190325_a001	190320_190325	P5
784	100	All	p5_190320_190325_190325_a001	190320_190325	P5
785	100	All	p5_190320_190325_190325_a001	190320_190325	P5
786	88.8889	All	p5_190320_190325_190325_a001	190320_190325	P5
787	96.2963	All	p5_190320_190325_190325_a001	190320_190325	P5
788	100	All	p5_190320_190325_190325_a001	190320_190325	P5
789	61.1111	All	p5_190320_190325_190325_a001	190320_190325	P5
790	50	All	p5_190320_190325_190325_a001	190320_190325	P5
791	100	All	p5_190320_190325_190325_a001	190320_190325	P5
792	62.5	All	p5_190320_190325_190325_a001	190320_190325	P5
793	87.5	All	p5_190320_190325_190325_a001	190320_190325	P5
794	90	All	p5_190320_190325_190325_a001	190320_190325	P5
795	83.3333	All	p5_190320_190325_190325_a001	190320_190325	P5
796	100	All	p5_190320_190325_190325_a001	190320_190325	P5
797	92.8571	All	p5_190320_190325_190325_a001	190320_190325	P5
798	83.3333	All	p5_190320_190325_190325_a001	190320_190325	P5
799	91.6667	All	p5_190320_190325_190325_a001	190320_190325	P5
800	83.3333	All	p5_190320_190325_190325_a001	190320_190325	P5
801	95.6522	All	p5_190320_190325_190325_a001	190320_190325	P5
802	100	All	p5_190320_190325_190325_a001	190320_190325	P5
803	91.6667	All	p5_190320_190325_190325_a001	190320_190325	P5
804	100	All	p5_190320_190325_190325_a001	190320_190325	P5
805	94.4444	All	p5_190320_190325_190325_a001	190320_190325	P5
806	57.1429	All	p5_190320_190325_190325_a001	190320_190325	P5
807	35.2941	All	p5_190320_190325_190325_a001	190320_190325	P5
808	93.75	All	p5_190320_190325_190325_a001	190320_190325	P5
809	100	All	p5_190320_190325_190325_a001	190320_190325	P5
810	80	All	p5_190320_190325_190325_a001	190320_190325	P5
811	100	All	p5_190320_190325_190325_a001	190320_190325	P5
812	83.3333	All	p5_190320_190325_190325_a001	190320_190325	P5
813	42.3077	All	p5_190320_190325_190325_a001	190320_190325	P5
814	100	All	p5_190320_190325_190325_a001	190320_190325	P5
815	88.8889	All	p5_190320_190325_190325_a001	190320_190325	P5
816	88.2353	All	p5_190320_190325_190325_a001	190320_190325	P5
817	89.1892	All	p5_190320_190325_190325_a001	190320_190325	P5
818	34.6154	All	p5_190320_190325_190325_a001	190320_190325	P5
819	89.4737	All	p5_190320_190325_190325_a001	190320_190325	P5
820	87.5	All	p5_190320_190325_190325_a001	190320_190325	P5
821	81.8182	All	p5_190320_190325_190325_a001	190320_190325	P5
822	100	All	p5_190320_190325_190325_a001	190320_190325	P5
823	100	All	p5_190320_190325_190325_a001	190320_190325	P5
824	94.7368	All	p5_190320_190325_190325_a001	190320_190325	P5
825	98.1132	All	p5_190320_190325_190325_a001	190320_190325	P5
826	83.3333	All	p5_190320_190325_190325_a001	190320_190325	P5
827	100	All	p5_190320_190325_190325_a001	190320_190325	P5
828	86.6667	All	p5_190320_190325_190325_a001	190320_190325	P5
829	79.1667	All	p5_190320_190325_190325_a001	190320_190325	P5
830	100	All	p5_190320_190325_190325_a001	190320_190325	P5
831	100	All	p5_190320_190325_190325_a001	190320_190325	P5
832	88.8889	All	p5_190320_190325_190325_a001	190320_190325	P5
833	57.1429	All	p5_190320_190325_190325_a001	190320_190325	P5
834	100	All	p5_190320_190325_190325_a001	190320_190325	P5
835	83.3333	All	p5_190320_190325_190325_a001	190320_190325	P5
836	100	All	p5_190320_190325_190325_a001	190320_190325	P5
837	66.6667	All	p5_190320_190325_190325_a001	190320_190325	P5
838	91.6667	All	p5_190320_190325_190325_a001	190320_190325	P5
839	100	All	p5_190320_190325_190325_a001	190320_190325	P5
840	66.6667	All	p5_190320_190325_190325_a001	190320_190325	P5
841	55.4795	All	p5_190320_190325_190325_a001	190320_190325	P5
842	84.2105	All	p5_190320_190325_190325_a001	190320_190325	P5
843	88.2353	All	p5_190320_190325_190325_a001	190320_190325	P5
844	83.3333	All	p5_190320_190325_190325_a001	190320_190325	P5
845	58.5366	All	p5_190320_190325_190325_a001	190320_190325	P5
846	100	All	p5_190320_190325_190325_a001	190320_190325	P5
847	69.5652	All	p5_190320_190325_190325_a001	190320_190325	P5
848	96.6667	All	p5_190320_190325_190325_a001	190320_190325	P5
849	85.7143	All	p5_190320_190325_190325_a001	190320_190325	P5
850	64.2857	All	p5_190320_190325_190325_a001	190320_190325	P5
851	79.1667	All	p5_190320_190325_190325_a001	190320_190325	P5
852	90	All	p5_190320_190325_190325_a001	190320_190325	P5
853	95.4545	All	p5_190320_190325_190325_a001	190320_190325	P5
854	94.1176	All	p5_190320_190325_190325_a001	190320_190325	P5
855	95.2381	All	p5_190320_190325_190325_a001	190320_190325	P5
856	92.5926	All	p5_190320_190325_190325_a001	190320_190325	P5
857	80	All	p5_190320_190325_190325_a001	190320_190325	P5
858	100	All	p5_190320_190325_190325_a001	190320_190325	P5
859	73.6842	All	p5_190320_190325_190325_a001	190320_190325	P5
860	0	All	p5_190320_190325_190325_a001	190320_190325	P5
861	57.1429	All	p5_190320_190325_190325_a001	190320_190325	P5
862	88.2353	All	p5_190320_190325_190325_a001	190320_190325	P5
863	94.4444	All	p5_190320_190325_190325_a001	190320_190325	P5
864	89.6552	All	p5_190320_190325_190325_a001	190320_190325	P5
865	50	All	p5_190320_190325_190325_a001	190320_190325	P5
866	90	All	p5_190320_190325_190325_a001	190320_190325	P5
867	94.4444	All	p5_190320_190325_190325_a001	190320_190325	P5
868	100	All	p5_190320_190325_190325_a001	190320_190325	P5
869	83.7838	All	p5_190320_190325_190325_a001	190320_190325	P5
870	100	All	p5_190320_190325_190325_a001	190320_190325	P5
871	71.0526	All	p5_190320_190325_190325_a001	190320_190325	P5
872	86.25	All	p5_191205_191210_0_191210_a000	191205_191210_0	P5
873	57.6271	All	p5_191205_191210_0_191210_a000	191205_191210_0	P5
874	56.8966	All	p5_191205_191210_0_191210_a000	191205_191210_0	P5
875	89.5349	All	p5_191205_191210_0_191210_a000	191205_191210_0	P5
876	82.6087	All	p5_191205_191210_0_191210_a000	191205_191210_0	P5
877	95.3846	All	p5_191205_191210_0_191210_a000	191205_191210_0	P5
878	58.209	All	p5_191205_191210_0_191210_a000	191205_191210_0	P5
879	82.8947	All	p5_191205_191210_0_191210_a000	191205_191210_0	P5
880	63.0631	All	p5_191205_191210_0_191210_a000	191205_191210_0	P5
881	84.2857	All	p5_191205_191210_0_191210_a000	191205_191210_0	P5
882	95.9459	All	p5_191205_191210_0_191210_a000	191205_191210_0	P5
883	84	All	p5_191205_191210_0_191210_a000	191205_191210_0	P5
884	94.1176	All	p5_191205_191210_0_191210_a000	191205_191210_0	P5
885	86.8421	All	p5_191205_191210_0_191210_a000	191205_191210_0	P5
886	56.8966	All	p5_191205_191210_0_191210_a000	191205_191210_0	P5
887	77.7778	All	p5_191205_191210_0_191210_a000	191205_191210_0	P5
888	42.5197	All	p5_191205_191210_0_191210_a000	191205_191210_0	P5
889	92.4528	All	p5_191205_191210_0_191210_a000	191205_191210_0	P5
890	67.5	All	p5_191205_191210_0_191210_a000	191205_191210_0	P5
891	70.5882	All	p5_191205_191210_0_191210_a000	191205_191210_0	P5
892	57.3171	All	p5_191205_191210_0_191210_a000	191205_191210_0	P5
893	73.6842	All	p5_191205_191210_0_191210_a000	191205_191210_0	P5
894	64.7059	All	p5_191205_191210_0_191210_a000	191205_191210_0	P5
895	79.0323	All	p5_191205_191210_0_191210_a000	191205_191210_0	P5
896	80.3571	All	p5_191205_191210_0_191210_a000	191205_191210_0	P5
897	66.0377	All	p5_191205_191210_0_191210_a000	191205_191210_0	P5
898	91.4894	All	p5_191205_191210_0_191210_a000	191205_191210_0	P5
899	87.3786	All	p5_191205_191210_0_191210_a000	191205_191210_0	P5
900	59.1716	All	p5_191205_191210_0_191210_a000	191205_191210_0	P5
901	27.9503	All	p5_191205_191210_0_191210_a000	191205_191210_0	P5
902	92.7273	All	p5_191205_191210_0_191210_a000	191205_191210_0	P5
903	94.3396	All	p5_191205_191210_0_191210_a000	191205_191210_0	P5
904	96.9697	All	p5_191205_191210_0_191210_a000	191205_191210_0	P5
905	87.9518	All	p5_191205_191210_0_191210_a000	191205_191210_0	P5
906	81.8182	All	p5_191205_191210_0_191210_a000	191205_191210_0	P5
907	69.6078	All	p5_191205_191210_0_191210_a000	191205_191210_0	P5
908	91.3793	All	p5_191205_191210_0_191210_a000	191205_191210_0	P5
909	97.6744	All	p5_191205_191210_0_191210_a000	191205_191210_0	P5
910	69.8113	All	p5_191205_191210_0_191210_a000	191205_191210_0	P5
911	57.5758	All	p5_191205_191210_0_191210_a000	191205_191210_0	P5
912	80.5825	All	p5_191205_191210_0_191210_a000	191205_191210_0	P5
913	57.9439	All	p5_191205_191210_0_191210_a000	191205_191210_0	P5
914	41.0714	All	p5_191205_191210_0_191210_a000	191205_191210_0	P5
915	75.4717	All	p5_191205_191210_0_191210_a000	191205_191210_0	P5
916	90.1408	All	p5_191205_191210_0_191210_a000	191205_191210_0	P5
917	83.3333	All	p5_191205_191210_0_191210_a000	191205_191210_0	P5
918	33.3333	All	p5_191205_191210_0_191210_a000	191205_191210_0	P5
919	84.6154	All	p5_191205_191210_0_191210_a000	191205_191210_0	P5
920	47.541	All	p5_191205_191210_0_191210_a000	191205_191210_0	P5
921	40	All	p5_191205_191210_0_191210_a000	191205_191210_0	P5
922	40	All	p5_191205_191210_0_191210_a000	191205_191210_0	P5
923	70.3704	All	p5_191205_191210_0_191210_a000	191205_191210_0	P5
924	55.2632	All	p5_191205_191210_0_191210_a000	191205_191210_0	P5
925	42.8571	All	p5_191205_191210_0_191210_a000	191205_191210_0	P5
926	25	All	p5_191205_191210_0_191210_a000	191205_191210_0	P5
927	48.9362	All	p5_191205_191210_0_191210_a000	191205_191210_0	P5
928	71.831	All	p5_191205_191210_0_191210_a000	191205_191210_0	P5
929	30	All	p5_191205_191210_0_191210_a000	191205_191210_0	P5
930	23.5294	All	p5_191205_191210_0_191210_a000	191205_191210_0	P5
931	54.5455	All	p5_191205_191210_0_191210_a000	191205_191210_0	P5
932	77.7778	All	p5_191205_191210_0_191210_a000	191205_191210_0	P5
933	39.2857	All	p5_191205_191210_0_191210_a000	191205_191210_0	P5
934	81.8182	All	p5_191205_191210_0_191210_a000	191205_191210_0	P5
935	45.9459	All	p5_191205_191210_0_191210_a000	191205_191210_0	P5
936	50	All	p5_191205_191210_0_191210_a000	191205_191210_0	P5
937	74.2268	All	p5_191205_191210_0_191210_a000	191205_191210_0	P5
938	61.194	All	p5_191205_191210_0_191210_a000	191205_191210_0	P5
939	55.4545	All	p5_191205_191210_0_191210_a000	191205_191210_0	P5
940	74.1935	All	p5_191205_191210_0_191210_a000	191205_191210_0	P5
941	92.7711	All	p5_191205_191210_0_191210_a000	191205_191210_0	P5
942	83.0769	All	p5_191205_191210_0_191210_a000	191205_191210_0	P5
943	66.4122	All	p5_191205_191210_0_191210_a000	191205_191210_0	P5
944	85.2459	All	p5_191205_191210_0_191210_a000	191205_191210_0	P5
945	93.1507	All	p5_191205_191210_0_191210_a000	191205_191210_0	P5
946	86.4198	All	p5_191205_191210_0_191210_a000	191205_191210_0	P5
947	83.5443	All	p5_191205_191210_0_191210_a000	191205_191210_0	P5
948	76.0331	All	p5_191205_191210_0_191210_a000	191205_191210_0	P5
949	77.3585	All	p5_191205_191210_0_191210_a000	191205_191210_0	P5
950	92.1569	All	p5_191205_191210_0_191210_a000	191205_191210_0	P5
951	82.8125	All	p5_191205_191210_0_191210_a000	191205_191210_0	P5
952	46.0526	All	p5_191205_191210_0_191210_a000	191205_191210_0	P5
953	61.1111	All	p5_191205_191210_0_191210_a000	191205_191210_0	P5
954	80	All	p5_191205_191210_0_191210_a000	191205_191210_0	P5
955	88.1356	All	p5_191205_191210_0_191210_a000	191205_191210_0	P5
956	77.3585	All	p5_191205_191210_0_191210_a000	191205_191210_0	P5
957	74.1379	All	p5_191205_191210_0_191210_a000	191205_191210_0	P5
958	87.3239	All	p5_191205_191210_0_191210_a000	191205_191210_0	P5
959	91.954	All	p5_191205_191210_0_191210_a000	191205_191210_0	P5
960	34.8837	All	p5_191205_191210_0_191210_a000	191205_191210_0	P5
961	86.6667	All	p5_191205_191210_0_191210_a000	191205_191210_0	P5
962	31.4607	All	p5_191205_191210_0_191210_a000	191205_191210_0	P5
963	87.1795	All	p5_191205_191210_0_191210_a000	191205_191210_0	P5
964	84.7059	All	p5_191205_191210_0_191210_a000	191205_191210_0	P5
965	58.3333	All	p5_191205_191210_0_191210_a000	191205_191210_0	P5
966	78.0952	All	p5_191205_191210_0_191210_a000	191205_191210_0	P5
967	50.7692	All	p5_191205_191210_0_191210_a000	191205_191210_0	P5
968	86.3636	All	p5_191205_191210_0_191210_a000	191205_191210_0	P5
969	81.4815	All	p5_191205_191210_0_191210_a000	191205_191210_0	P5
970	77.2277	All	p5_191205_191210_0_191210_a000	191205_191210_0	P5
971	37.594	All	p5_191205_191210_0_191210_a000	191205_191210_0	P5
972	64.5833	All	p5_191205_191210_0_191210_a000	191205_191210_0	P5
973	82.5688	All	p5_191205_191210_0_191210_a000	191205_191210_0	P5
974	73.913	All	p5_191205_191210_0_191210_a000	191205_191210_0	P5
975	85	All	p5_191205_191210_0_191210_a000	191205_191210_0	P5
976	77.2277	All	p5_191205_191210_0_191210_a000	191205_191210_0	P5
977	82.0513	All	p5_191205_191210_0_191210_a000	191205_191210_0	P5
978	54.8077	All	p5_191205_191210_0_191210_a000	191205_191210_0	P5
979	85.4167	All	p5_191205_191210_0_191210_a000	191205_191210_0	P5
980	94.5946	All	p5_191205_191210_0_191210_a001	191205_191210_0	P5
981	38.6364	All	p5_191205_191210_0_191210_a001	191205_191210_0	P5
982	64.7059	All	p5_191205_191210_0_191210_a001	191205_191210_0	P5
983	92	All	p5_191205_191210_0_191210_a001	191205_191210_0	P5
984	54.5455	All	p5_191205_191210_0_191210_a001	191205_191210_0	P5
985	83.871	All	p5_191205_191210_0_191210_a001	191205_191210_0	P5
986	100	All	p5_191205_191210_0_191210_a001	191205_191210_0	P5
987	84.8485	All	p5_191205_191210_0_191210_a001	191205_191210_0	P5
988	38.7755	All	p5_191205_191210_0_191210_a001	191205_191210_0	P5
989	84.6154	All	p5_191205_191210_0_191210_a001	191205_191210_0	P5
990	85.3659	All	p5_191205_191210_0_191210_a001	191205_191210_0	P5
991	90.3226	All	p5_191205_191210_0_191210_a001	191205_191210_0	P5
992	82.8571	All	p5_191205_191210_0_191210_a001	191205_191210_0	P5
993	79.4118	All	p5_191205_191210_0_191210_a001	191205_191210_0	P5
994	75.8621	All	p5_191205_191210_0_191210_a001	191205_191210_0	P5
995	100	All	p5_191205_191210_0_191210_a001	191205_191210_0	P5
996	60.8696	All	p5_191205_191210_0_191210_a001	191205_191210_0	P5
997	96.5517	All	p5_191205_191210_0_191210_a001	191205_191210_0	P5
998	81.8182	All	p5_191205_191210_0_191210_a001	191205_191210_0	P5
999	72	All	p5_191205_191210_0_191210_a001	191205_191210_0	P5
1000	87.7551	All	p5_191205_191210_0_191210_a001	191205_191210_0	P5
1001	83.3333	All	p5_191205_191210_0_191210_a001	191205_191210_0	P5
1002	71.4286	All	p5_191205_191210_0_191210_a001	191205_191210_0	P5
1003	91.1765	All	p5_191205_191210_0_191210_a001	191205_191210_0	P5
1004	64.4444	All	p5_191205_191210_0_191210_a001	191205_191210_0	P5
1005	97.7273	All	p5_191205_191210_0_191210_a001	191205_191210_0	P5
1006	89.2857	All	p5_191205_191210_0_191210_a001	191205_191210_0	P5
1007	89.7436	All	p5_191205_191210_0_191210_a001	191205_191210_0	P5
1008	84.2105	All	p5_191205_191210_0_191210_a001	191205_191210_0	P5
1009	69.2308	All	p5_191205_191210_0_191210_a001	191205_191210_0	P5
1010	79.4118	All	p5_191205_191210_0_191210_a001	191205_191210_0	P5
1011	97.2222	All	p5_191205_191210_0_191210_a001	191205_191210_0	P5
1012	86	All	p5_191205_191210_0_191210_a001	191205_191210_0	P5
1013	75	All	p5_191205_191210_0_191210_a001	191205_191210_0	P5
1014	94.4444	All	p5_191205_191210_0_191210_a001	191205_191210_0	P5
1015	76.6667	All	p5_191205_191210_0_191210_a001	191205_191210_0	P5
1016	86.4865	All	p5_191205_191210_0_191210_a001	191205_191210_0	P5
1017	84.375	All	p5_191205_191210_0_191210_a001	191205_191210_0	P5
1018	80	All	p5_191205_191210_0_191210_a001	191205_191210_0	P5
1019	81.8182	All	p5_191205_191210_0_191210_a001	191205_191210_0	P5
1020	76.1905	All	p5_191205_191210_0_191210_a001	191205_191210_0	P5
1021	85.7143	All	p5_191205_191210_0_191210_a001	191205_191210_0	P5
1022	70.9677	All	p5_191205_191210_0_191210_a001	191205_191210_0	P5
1023	66.6667	All	p5_191205_191210_0_191210_a001	191205_191210_0	P5
1024	67.7419	All	p5_191205_191210_0_191210_a001	191205_191210_0	P5
1025	78.7234	All	p5_191205_191210_0_191210_a001	191205_191210_0	P5
1026	100	All	p5_191205_191210_0_191210_a001	191205_191210_0	P5
1027	100	All	p5_191205_191210_0_191210_a001	191205_191210_0	P5
1028	84.0909	All	p5_191205_191210_0_191210_a001	191205_191210_0	P5
1029	79.4872	All	p5_191205_191210_0_191210_a001	191205_191210_0	P5
1030	82.6087	All	p5_191205_191210_0_191210_a001	191205_191210_0	P5
1031	52.2727	All	p5_191205_191210_0_191210_a001	191205_191210_0	P5
1032	78.9474	All	p5_191205_191210_0_191210_a001	191205_191210_0	P5
1033	60	All	p5_191205_191210_0_191210_a001	191205_191210_0	P5
1034	82.6923	All	p5_191205_191210_0_191210_a001	191205_191210_0	P5
1035	85.7143	All	p5_191205_191210_0_191210_a001	191205_191210_0	P5
1036	87.1795	All	p5_191205_191210_0_191210_a001	191205_191210_0	P5
1037	81.8182	All	p5_191205_191210_0_191210_a001	191205_191210_0	P5
1038	53.8462	All	p5_191205_191210_0_191210_a001	191205_191210_0	P5
1039	66.6667	All	p5_191205_191210_0_191210_a001	191205_191210_0	P5
1040	72.2222	All	p5_191205_191210_0_191210_a001	191205_191210_0	P5
1041	87.8049	All	p5_191205_191210_0_191210_a001	191205_191210_0	P5
1042	66.6667	All	p5_191205_191210_0_191210_a001	191205_191210_0	P5
1043	93.3333	All	p5_191205_191210_0_191210_a001	191205_191210_0	P5
1044	69.5652	All	p5_191205_191210_0_191210_a001	191205_191210_0	P5
1045	68.5185	All	p5_191205_191210_0_191210_a001	191205_191210_0	P5
1046	78.5714	All	p5_191205_191210_0_191210_a001	191205_191210_0	P5
1047	72.4138	All	p5_191205_191210_0_191210_a001	191205_191210_0	P5
1048	56.8627	All	p5_191205_191210_0_191210_a001	191205_191210_0	P5
1049	60.5263	All	p5_191205_191210_0_191210_a001	191205_191210_0	P5
1050	92.3077	All	p5_191205_191210_0_191210_a001	191205_191210_0	P5
1051	67.6471	All	p5_191205_191210_0_191210_a001	191205_191210_0	P5
1052	74.4186	All	p5_191205_191210_0_191210_a001	191205_191210_0	P5
1053	66.6667	All	p5_191205_191210_0_191210_a001	191205_191210_0	P5
1054	45.614	All	p5_191205_191210_0_191210_a001	191205_191210_0	P5
1055	65.3061	All	p5_191205_191210_0_191210_a001	191205_191210_0	P5
1056	46.2963	All	p5_191205_191210_0_191210_a001	191205_191210_0	P5
1057	48.0769	All	p5_191205_191210_0_191210_a001	191205_191210_0	P5
1058	74.4681	All	p5_191205_191210_0_191210_a001	191205_191210_0	P5
1059	80	All	p5_191205_191210_0_191210_a001	191205_191210_0	P5
1060	61.7021	All	p5_191205_191210_0_191210_a001	191205_191210_0	P5
1061	92.5	All	p5_191205_191210_0_191210_a001	191205_191210_0	P5
1062	86.1111	All	p5_191205_191210_0_191210_a001	191205_191210_0	P5
1063	80.9524	All	p5_191205_191210_0_191210_a001	191205_191210_0	P5
1064	86.6667	All	p5_191205_191210_0_191210_a001	191205_191210_0	P5
1065	64.4444	All	p5_191205_191210_0_191210_a001	191205_191210_0	P5
1066	70.8333	All	p5_191205_191210_0_191210_a001	191205_191210_0	P5
1067	83.3333	All	p5_191205_191210_0_191210_a001	191205_191210_0	P5
1068	65.7143	All	p5_191205_191210_0_191210_a001	191205_191210_0	P5
1069	82.2222	All	p5_191205_191210_0_191210_a001	191205_191210_0	P5
1070	81.4815	All	p5_191205_191210_0_191210_a001	191205_191210_0	P5
1071	58.9744	All	p5_191205_191210_0_191210_a001	191205_191210_0	P5
1072	50	All	p5_191205_191210_0_191210_a001	191205_191210_0	P5
1073	71.1538	All	p5_191205_191210_0_191210_a001	191205_191210_0	P5
1074	60.8696	All	p5_191205_191210_0_191210_a001	191205_191210_0	P5
1075	34.7826	All	p5_191205_191210_0_191210_a001	191205_191210_0	P5
1076	82.5	All	p5_191205_191210_0_191210_a001	191205_191210_0	P5
1077	57.6923	All	p5_191205_191210_0_191210_a001	191205_191210_0	P5
1078	78.125	All	p5_191205_191210_0_191210_a001	191205_191210_0	P5
1079	62.963	All	p5_191205_191210_0_191210_a001	191205_191210_0	P5
1080	88.6364	All	p5_191205_191210_0_191210_a001	191205_191210_0	P5
1081	77.2727	All	p5_191205_191210_0_191210_a001	191205_191210_0	P5
1082	65.3846	All	p5_191205_191210_0_191210_a001	191205_191210_0	P5
1083	88	All	p5_191205_191210_0_191210_a001	191205_191210_0	P5
1084	80.8511	All	p5_191205_191210_0_191210_a001	191205_191210_0	P5
1085	81.25	All	p5_191205_191210_0_191210_a001	191205_191210_0	P5
1086	74.4681	All	p5_191205_191210_0_191210_a001	191205_191210_0	P5
1087	80	All	p5_191205_191210_0_191210_a001	191205_191210_0	P5
1088	70.2128	All	p5_191205_191210_0_191210_a001	191205_191210_0	P5
1089	66.6667	All	p5_191205_191210_0_191210_a001	191205_191210_0	P5
1090	50	All	p5_191205_191210_0_191210_a001	191205_191210_0	P5
1091	23.5294	All	p5_191205_191210_0_191210_a001	191205_191210_0	P5
1092	40	All	p5_191205_191210_0_191210_a001	191205_191210_0	P5
1093	36.3636	All	p5_191205_191210_0_191210_a001	191205_191210_0	P5
1094	41.9355	All	p5_191205_191210_0_191210_a001	191205_191210_0	P5
1095	90	All	p5_191205_191210_0_191210_a001	191205_191210_0	P5
1096	33.3333	All	p5_191205_191210_0_191210_a001	191205_191210_0	P5
1097	38.0952	All	p5_191205_191210_0_191210_a001	191205_191210_0	P5
1098	41.3793	All	p5_191205_191210_0_191210_a001	191205_191210_0	P5
1099	92.3077	All	p5_191205_191210_0_191210_a001	191205_191210_0	P5
1100	18.75	All	p5_191205_191210_0_191210_a001	191205_191210_0	P5
1101	42.8571	All	p5_191205_191210_0_191210_a001	191205_191210_0	P5
1102	60.8696	All	p5_191205_191210_0_191210_a001	191205_191210_0	P5
1103	32	All	p5_191205_191210_0_191210_a001	191205_191210_0	P5
1104	30	All	p5_191205_191210_0_191210_a001	191205_191210_0	P5
1105	11.1111	All	p5_191205_191210_0_191210_a001	191205_191210_0	P5
1106	27.2727	All	p5_191205_191210_0_191210_a001	191205_191210_0	P5
1107	25	All	p5_191205_191210_0_191210_a001	191205_191210_0	P5
1108	47.3684	All	p5_191205_191210_0_191210_a001	191205_191210_0	P5
1109	28.5714	All	p5_191205_191210_0_191210_a001	191205_191210_0	P5
1110	7.14286	All	p5_191205_191210_0_191210_a001	191205_191210_0	P5
1111	41.6667	All	p5_191205_191210_0_191210_a001	191205_191210_0	P5
1112	77.4194	All	p5_191205_191210_0_191210_a001	191205_191210_0	P5
1113	33.3333	All	p5_191205_191210_0_191210_a001	191205_191210_0	P5
1114	40	All	p5_191205_191210_0_191210_a001	191205_191210_0	P5
1115	20	All	p5_191205_191210_0_191210_a001	191205_191210_0	P5
1116	17.6471	All	p5_191205_191210_0_191210_a001	191205_191210_0	P5
1117	100	All	p5_191205_191210_0_191210_a001	191205_191210_0	P5
1118	25.9259	All	p5_191205_191210_0_191210_a001	191205_191210_0	P5
1119	29.2683	All	p5_191205_191210_0_191210_a001	191205_191210_0	P5
1120	77.2727	All	p5_191205_191210_0_191210_a001	191205_191210_0	P5
1121	80	All	p5_191205_191210_0_191210_a001	191205_191210_0	P5
1122	5.55556	All	p5_191205_191210_0_191210_a001	191205_191210_0	P5
1123	94.7368	All	p5_191205_191210_0_191210_a001	191205_191210_0	P5
1124	70	All	p5_191205_191210_0_191210_a001	191205_191210_0	P5
1125	0	All	p5_191205_191210_0_191210_a001	191205_191210_0	P5
1126	34.7826	All	p5_191205_191210_0_191210_a001	191205_191210_0	P5
1127	78.5714	All	p5_191205_191210_0_191210_a001	191205_191210_0	P5
1128	45.4545	All	p5_191205_191210_0_191210_a001	191205_191210_0	P5
1129	36	All	p5_191205_191210_0_191210_a001	191205_191210_0	P5
1130	48.5714	All	p5_191205_191210_0_191210_a001	191205_191210_0	P5
1131	40	All	p5_191205_191210_0_191210_a001	191205_191210_0	P5
1132	40	All	p5_191205_191210_0_191210_a001	191205_191210_0	P5
1133	30.7692	All	p5_191205_191210_0_191210_a001	191205_191210_0	P5
1134	95.4545	All	p5_191205_191210_0_191210_a001	191205_191210_0	P5
1135	75.8621	All	p5_191205_191210_0_191210_a001	191205_191210_0	P5
1136	37.5	All	p5_191205_191210_0_191210_a001	191205_191210_0	P5
1137	85.7143	All	p5_191205_191210_0_191210_a001	191205_191210_0	P5
1138	84.8485	All	p5_191205_191210_0_191210_a001	191205_191210_0	P5
1139	25.641	All	p5_191205_191210_0_191210_a001	191205_191210_0	P5
1140	72.973	All	p5_191205_191210_0_191210_a001	191205_191210_0	P5
1141	62.2222	All	p5_191205_191210_0_191210_a001	191205_191210_0	P5
1142	65.625	All	p5_191205_191210_0_191210_a001	191205_191210_0	P5
1143	77.7778	All	p5_191205_191210_0_191210_a001	191205_191210_0	P5
1144	85.7143	All	p5_191205_191210_0_191210_a001	191205_191210_0	P5
1145	100	All	p5_191205_191210_0_191210_a001	191205_191210_0	P5
1146	85.7143	All	p5_191205_191210_0_191210_a001	191205_191210_0	P5
1147	58.3333	All	p5_191205_191210_0_191210_a001	191205_191210_0	P5
1148	70.2703	All	p5_191205_191210_0_191210_a001	191205_191210_0	P5
1149	95	All	p5_191205_191210_0_191210_a001	191205_191210_0	P5
1150	88	All	p5_191205_191210_0_191210_a001	191205_191210_0	P5
1151	82.6087	All	p5_191205_191210_0_191210_a001	191205_191210_0	P5
1152	100	All	p5_191205_191210_0_191210_a001	191205_191210_0	P5
1153	33.3333	All	p5_191205_191210_0_191210_a001	191205_191210_0	P5
1154	72	All	p5_191205_191210_0_191210_a001	191205_191210_0	P5
1155	93.1034	All	p5_191205_191210_0_191210_a001	191205_191210_0	P5
1156	58.3333	All	p5_191205_191210_0_191210_a001	191205_191210_0	P5
1157	58.8235	All	p5_191205_191210_0_191210_a001	191205_191210_0	P5
1158	77.4194	All	p5_191205_191210_0_191210_a001	191205_191210_0	P5
1159	78.0488	All	p5_191205_191210_0_191210_a001	191205_191210_0	P5
1160	69.2308	All	p5_191205_191210_0_191210_a001	191205_191210_0	P5
1161	85	All	p5_191205_191210_0_191210_a001	191205_191210_0	P5
1162	65	All	p5_191205_191210_0_191210_a001	191205_191210_0	P5
1163	85.3659	All	p5_191205_191210_0_191210_a001	191205_191210_0	P5
1164	35.8491	All	p5_191205_191210_0_191210_a001	191205_191210_0	P5
1165	88.2353	All	p5_191205_191210_0_191210_a001	191205_191210_0	P5
1166	92.6829	All	p5_191205_191210_0_191210_a001	191205_191210_0	P5
1167	46.5116	All	p5_191205_191210_0_191210_a001	191205_191210_0	P5
1168	86.4865	All	p5_191205_191210_0_191210_a001	191205_191210_0	P5
1169	95.8333	All	p5_191205_191210_0_191210_a001	191205_191210_0	P5
1170	88.4615	All	p5_191205_191210_0_191210_a001	191205_191210_0	P5
1171	74.5098	All	p5_191205_191210_0_191210_a001	191205_191210_0	P5
1172	60.8696	All	p5_191205_191210_0_191210_a001	191205_191210_0	P5
1173	75	All	p5_191205_191210_0_191210_a001	191205_191210_0	P5
1174	51.8519	All	p5_191205_191210_0_191210_a001	191205_191210_0	P5
1175	87.5	All	p5_191205_191210_0_191210_a001	191205_191210_0	P5
1176	71.0526	All	p5_191205_191210_0_191210_a001	191205_191210_0	P5
1177	60	All	p5_191205_191210_0_191210_a001	191205_191210_0	P5
1178	75.8621	All	p5_191205_191210_0_191210_a001	191205_191210_0	P5
1179	90.3226	All	p5_191205_191210_0_191210_a001	191205_191210_0	P5
1180	70	All	p5_191205_191210_0_191210_a001	191205_191210_0	P5
1181	78.9474	All	p5_191205_191210_0_191210_a001	191205_191210_0	P5
1182	81.4815	All	p5_191205_191210_0_191210_a001	191205_191210_0	P5
1183	23.8095	All	p5_191205_191210_0_191210_a001	191205_191210_0	P5
1184	62.2222	All	p5_191205_191210_0_191210_a001	191205_191210_0	P5
1185	40.4255	All	p5_191205_191210_0_191210_a001	191205_191210_0	P5
1186	34.1463	All	p5_191205_191210_0_191210_a001	191205_191210_0	P5
1187	62.5	All	p5_191205_191210_0_191210_a001	191205_191210_0	P5
1188	89.2857	All	p5_191205_191210_0_191210_a001	191205_191210_0	P5
1189	70	All	p5_191205_191210_0_191210_a001	191205_191210_0	P5
1190	48.3871	All	p5_191205_191210_0_191210_a001	191205_191210_0	P5
1191	76.6667	All	p5_191205_191210_0_191210_a001	191205_191210_0	P5
1192	55.7692	All	p5_191205_191210_0_191210_a001	191205_191210_0	P5
1193	72	All	p5_191205_191210_0_191210_a001	191205_191210_0	P5
1194	42.5532	All	p5_191205_191210_0_191210_a001	191205_191210_0	P5
1195	45.8333	All	p5_191205_191210_0_191210_a001	191205_191210_0	P5
1196	76.9231	All	p5_191205_191210_0_191210_a001	191205_191210_0	P5
1197	62.2222	All	p5_191205_191210_0_191210_a001	191205_191210_0	P5
1198	28.5714	All	p5_191205_191210_0_191210_a001	191205_191210_0	P5
1199	100	All	p5_191205_191210_0_191210_a001	191205_191210_0	P5
1200	36.3636	All	p5_191205_191210_0_191210_a001	191205_191210_0	P5
1201	26.8293	All	p5_191205_191210_0_191210_a001	191205_191210_0	P5
1202	38.2979	All	p5_191205_191210_0_191210_a001	191205_191210_0	P5
1203	59.0909	All	p5_191205_191210_0_191210_a001	191205_191210_0	P5
1204	42.1053	All	p5_191205_191210_0_191210_a001	191205_191210_0	P5
1205	64.2857	All	p5_191205_191210_0_191210_a001	191205_191210_0	P5
1206	25	All	p5_191205_191210_0_191210_a001	191205_191210_0	P5
1207	36.3636	All	p5_191205_191210_0_191210_a001	191205_191210_0	P5
1208	89.2857	All	p5_191205_191210_0_191210_a001	191205_191210_0	P5
1209	70	All	p5_191205_191210_0_191210_a001	191205_191210_0	P5
1210	33.3333	All	p5_191205_191210_0_191210_a001	191205_191210_0	P5
1211	100	All	p5_191205_191210_0_191210_a001	191205_191210_0	P5
1212	87.5	All	p5_191205_191210_0_191210_a001	191205_191210_0	P5
1213	53.3333	All	p5_191205_191210_0_191210_a001	191205_191210_0	P5
1214	76.6667	All	p5_191205_191210_0_191210_a001	191205_191210_0	P5
1215	54	All	p5_191205_191210_0_191210_a001	191205_191210_0	P5
1216	33.3333	All	p5_191205_191210_0_191210_a001	191205_191210_0	P5
1217	32	All	p5_191205_191210_0_191210_a001	191205_191210_0	P5
1218	19.0476	All	p5_191205_191210_0_191210_a001	191205_191210_0	P5
1219	34.4828	All	p5_191205_191210_0_191210_a001	191205_191210_0	P5
1220	88.8889	All	p5_191205_191210_0_191210_a001	191205_191210_0	P5
1221	7.14286	All	p5_191205_191210_0_191210_a001	191205_191210_0	P5
1222	69.2308	All	p5_191205_191210_0_191210_a001	191205_191210_0	P5
1223	42.8571	All	p5_191205_191210_0_191210_a001	191205_191210_0	P5
1224	36.3636	All	p5_191205_191210_0_191210_a001	191205_191210_0	P5
1225	34.1463	All	p5_191205_191210_0_191210_a001	191205_191210_0	P5
1226	62.5	All	p5_191205_191210_0_191210_a001	191205_191210_0	P5
1227	70	All	p5_191205_191210_0_191210_a001	191205_191210_0	P5
1228	90.625	All	p5_191205_191210_0_191210_a001	191205_191210_0	P5
1229	38.2979	All	p5_191205_191210_0_191210_a001	191205_191210_0	P5
1230	46.1538	All	p5_191205_191210_0_191210_a001	191205_191210_0	P5
1231	52	All	p5_191205_191210_0_191210_a001	191205_191210_0	P5
1232	40	All	p5_191205_191210_0_191210_a001	191205_191210_0	P5
1233	75	All	p5_191205_191210_0_191210_a001	191205_191210_0	P5
1234	63.1579	All	p5_191205_191210_0_191210_a001	191205_191210_0	P5
1235	52	All	p5_191205_191210_0_191210_a001	191205_191210_0	P5
1236	62.2222	All	p5_191205_191210_0_191210_a001	191205_191210_0	P5
1237	50	All	p5_191205_191210_0_191210_a001	191205_191210_0	P5
1238	40	All	p5_191205_191210_0_191210_a001	191205_191210_0	P5
1239	30.7692	All	p5_191205_191210_0_191210_a001	191205_191210_0	P5
1240	66.6667	All	p5_191205_191210_0_191210_a001	191205_191210_0	P5
1241	93.1034	All	p5_191205_191210_0_191210_a001	191205_191210_0	P5
1242	70	All	p5_191205_191210_0_191210_a001	191205_191210_0	P5
1243	76.6667	All	p5_191205_191210_0_191210_a001	191205_191210_0	P5
1244	85.7143	All	p5_191205_191210_0_191210_a001	191205_191210_0	P5
1245	38.6364	All	p5_191205_191210_0_191210_a001	191205_191210_0	P5
1246	77.4194	All	p5_191205_191210_1_191210_a000	191205_191210_1	P5
1247	100	All	p5_191205_191210_1_191210_a000	191205_191210_1	P5
1248	62.7907	All	p5_191205_191210_1_191210_a000	191205_191210_1	P5
1249	65	All	p5_191205_191210_1_191210_a000	191205_191210_1	P5
1250	30.2083	All	p5_191205_191210_1_191210_a000	191205_191210_1	P5
1251	80.303	All	p5_191205_191210_1_191210_a000	191205_191210_1	P5
1252	86.9565	All	p5_191205_191210_1_191210_a000	191205_191210_1	P5
1253	23.8095	All	p5_191205_191210_1_191210_a000	191205_191210_1	P5
1254	39.3701	All	p5_191205_191210_1_191210_a000	191205_191210_1	P5
1255	78.2609	All	p5_191205_191210_1_191210_a000	191205_191210_1	P5
1256	52.6316	All	p5_191205_191210_1_191210_a000	191205_191210_1	P5
1257	85.7143	All	p5_191205_191210_1_191210_a000	191205_191210_1	P5
1258	88.8	All	p5_191205_191210_1_191210_a000	191205_191210_1	P5
1259	89.8148	All	p5_191205_191210_1_191210_a000	191205_191210_1	P5
1260	42.735	All	p5_191205_191210_1_191210_a000	191205_191210_1	P5
1261	10.4167	All	p5_191205_191210_1_191210_a000	191205_191210_1	P5
1262	84.6154	All	p5_191205_191210_1_191210_a000	191205_191210_1	P5
1263	46.9136	All	p5_191205_191210_1_191210_a000	191205_191210_1	P5
1264	56	All	p5_191205_191210_1_191210_a000	191205_191210_1	P5
1265	73.8462	All	p5_191205_191210_1_191210_a000	191205_191210_1	P5
1266	45.6897	All	p5_191205_191210_1_191210_a000	191205_191210_1	P5
1267	83.0769	All	p5_191205_191210_1_191210_a000	191205_191210_1	P5
1268	79.2453	All	p5_191205_191210_1_191210_a000	191205_191210_1	P5
1269	70.1754	All	p5_191205_191210_1_191210_a000	191205_191210_1	P5
1270	84.3373	All	p5_191205_191210_1_191210_a000	191205_191210_1	P5
1271	62.9213	All	p5_191205_191210_1_191210_a000	191205_191210_1	P5
1272	44.4444	All	p5_191205_191210_1_191210_a000	191205_191210_1	P5
1273	78.3133	All	p5_191205_191210_1_191210_a000	191205_191210_1	P5
1274	75	All	p5_191205_191210_1_191210_a000	191205_191210_1	P5
1275	90.9836	All	p5_191205_191210_1_191210_a000	191205_191210_1	P5
1276	63.6364	All	p5_191205_191210_1_191210_a000	191205_191210_1	P5
1277	79.7297	All	p5_191205_191210_1_191210_a000	191205_191210_1	P5
1278	82.9787	All	p5_191205_191210_1_191210_a000	191205_191210_1	P5
1279	97.3214	All	p5_191205_191210_1_191210_a000	191205_191210_1	P5
1280	24.5283	All	p5_191205_191210_1_191210_a000	191205_191210_1	P5
1281	61.3208	All	p5_191205_191210_1_191210_a000	191205_191210_1	P5
1282	44.7761	All	p5_191205_191210_1_191210_a000	191205_191210_1	P5
1283	87.6543	All	p5_191205_191210_1_191210_a000	191205_191210_1	P5
1284	40.5797	All	p5_191205_191210_1_191210_a000	191205_191210_1	P5
1285	76.2295	All	p5_191205_191210_1_191210_a000	191205_191210_1	P5
1286	51.0791	All	p5_191205_191210_1_191210_a000	191205_191210_1	P5
1287	52.5424	All	p5_191205_191210_1_191210_a000	191205_191210_1	P5
1288	81.25	All	p5_191205_191210_1_191210_a000	191205_191210_1	P5
1289	85.5072	All	p5_191205_191210_1_191210_a000	191205_191210_1	P5
1290	81.0127	All	p5_191205_191210_1_191210_a000	191205_191210_1	P5
1291	50.2674	All	p5_191205_191210_1_191210_a000	191205_191210_1	P5
1292	88.1579	All	p5_191205_191210_1_191210_a000	191205_191210_1	P5
1293	86.1111	All	p5_191205_191210_1_191210_a000	191205_191210_1	P5
1294	24.0385	All	p5_191205_191210_1_191210_a000	191205_191210_1	P5
1295	76.0274	All	p5_191205_191210_1_191210_a000	191205_191210_1	P5
1296	42.8571	All	p5_191205_191210_1_191210_a000	191205_191210_1	P5
1297	90	All	p5_191205_191210_1_191210_a000	191205_191210_1	P5
1298	84.9057	All	p5_191205_191210_1_191210_a000	191205_191210_1	P5
1299	88.0597	All	p5_191205_191210_1_191210_a000	191205_191210_1	P5
1300	65.0407	All	p5_191205_191210_1_191210_a000	191205_191210_1	P5
1301	84.2466	All	p5_191205_191210_1_191210_a000	191205_191210_1	P5
1302	73.1959	All	p5_191205_191210_1_191210_a000	191205_191210_1	P5
1303	51.2605	All	p5_191205_191210_1_191210_a000	191205_191210_1	P5
1304	93.1507	All	p5_191205_191210_1_191210_a000	191205_191210_1	P5
1305	13.1148	All	p5_191205_191210_1_191210_a000	191205_191210_1	P5
1306	60.8247	All	p5_191205_191210_1_191210_a000	191205_191210_1	P5
1307	46.281	All	p5_191205_191210_1_191210_a000	191205_191210_1	P5
1308	50.4854	All	p5_191205_191210_1_191210_a000	191205_191210_1	P5
1309	51.9608	All	p5_191205_191210_1_191210_a000	191205_191210_1	P5
1310	91.6667	All	p5_191205_191210_1_191210_a000	191205_191210_1	P5
1311	58.2734	All	p5_191205_191210_1_191210_a000	191205_191210_1	P5
1312	50.9434	All	p5_191205_191210_1_191210_a000	191205_191210_1	P5
1313	79.0123	All	p5_191205_191210_1_191210_a000	191205_191210_1	P5
1314	42.9577	All	p5_191205_191210_1_191210_a000	191205_191210_1	P5
1315	35	All	p5_191205_191210_1_191210_a000	191205_191210_1	P5
1316	87.5	All	p5_191205_191210_1_191210_a000	191205_191210_1	P5
1317	76.1905	All	p5_191205_191210_1_191210_a000	191205_191210_1	P5
1318	44.2623	All	p5_191205_191210_1_191210_a000	191205_191210_1	P5
1319	57.1429	All	p5_191205_191210_1_191210_a000	191205_191210_1	P5
1320	28.7234	All	p5_191205_191210_1_191210_a000	191205_191210_1	P5
1321	91.2621	All	p5_191205_191210_1_191210_a000	191205_191210_1	P5
1322	63.4921	All	p5_191205_191210_1_191210_a000	191205_191210_1	P5
1323	53.5211	All	p5_191205_191210_1_191210_a000	191205_191210_1	P5
1324	81.5217	All	p5_191205_191210_1_191210_a000	191205_191210_1	P5
1325	82.6087	All	p5_191205_191210_1_191210_a000	191205_191210_1	P5
1326	70	All	p5_191205_191210_1_191210_a000	191205_191210_1	P5
1327	77.8947	All	p5_191205_191210_1_191210_a000	191205_191210_1	P5
1328	83.871	All	p5_191205_191210_1_191210_a000	191205_191210_1	P5
1329	71.4286	All	p5_191205_191210_1_191210_a000	191205_191210_1	P5
1330	58.6777	All	p5_191205_191210_1_191210_a000	191205_191210_1	P5
1331	53.9062	All	p5_191205_191210_1_191210_a000	191205_191210_1	P5
1332	77.5	All	p5_191205_191210_1_191210_a000	191205_191210_1	P5
1333	40.5941	All	p5_191205_191210_1_191210_a000	191205_191210_1	P5
1334	44	All	p5_191205_191210_1_191210_a000	191205_191210_1	P5
1335	58.7302	All	p5_191205_191210_1_191210_a000	191205_191210_1	P5
1336	45.3704	All	p5_191205_191210_1_191210_a000	191205_191210_1	P5
1337	46.8085	All	p5_191205_191210_1_191210_a000	191205_191210_1	P5
1338	71.4286	All	p5_191205_191210_1_191210_a000	191205_191210_1	P5
1339	80.1282	All	p5_191205_191210_1_191210_a000	191205_191210_1	P5
1340	53.4884	All	p5_191205_191210_1_191210_a000	191205_191210_1	P5
1341	74.1007	All	p5_191205_191210_1_191210_a000	191205_191210_1	P5
1342	40.9396	All	p5_191205_191210_1_191210_a000	191205_191210_1	P5
1343	69.5122	All	p5_191205_191210_1_191210_a000	191205_191210_1	P5
1344	48.5149	All	p5_191205_191210_1_191210_a000	191205_191210_1	P5
1345	81.5789	All	p5_191205_191210_1_191210_a000	191205_191210_1	P5
1346	79	All	p5_191205_191210_1_191210_a000	191205_191210_1	P5
1347	83.5821	All	p5_191205_191210_1_191210_a000	191205_191210_1	P5
1348	85	All	p5_191205_191210_1_191210_a000	191205_191210_1	P5
1349	60.9023	All	p5_191205_191210_1_191210_a000	191205_191210_1	P5
1350	91.8919	All	p5_191205_191210_1_191210_a000	191205_191210_1	P5
1351	62.1951	All	p5_191205_191210_1_191210_a000	191205_191210_1	P5
1352	83.8384	All	p5_191205_191210_1_191210_a000	191205_191210_1	P5
1353	91.5789	All	p5_191205_191210_1_191210_a000	191205_191210_1	P5
1354	92.1875	All	p5_191205_191210_1_191210_a000	191205_191210_1	P5
1355	51.0067	All	p5_191205_191210_1_191210_a000	191205_191210_1	P5
1356	88.5246	All	p5_191205_191210_1_191210_a000	191205_191210_1	P5
1357	80.3922	All	p5_191205_191210_1_191210_a000	191205_191210_1	P5
1358	76.9231	All	p5_191205_191210_1_191210_a000	191205_191210_1	P5
1359	72.093	All	p5_191205_191210_1_191210_a000	191205_191210_1	P5
1360	92.7835	All	p5_191205_191210_1_191210_a000	191205_191210_1	P5
1361	55.8824	All	p5_191205_191210_1_191210_a001	191205_191210_1	P5
1362	68.1818	All	p5_191205_191210_1_191210_a001	191205_191210_1	P5
1363	48.1481	All	p5_191205_191210_1_191210_a001	191205_191210_1	P5
1364	52.6316	All	p5_191205_191210_1_191210_a001	191205_191210_1	P5
1365	50	All	p5_191205_191210_1_191210_a001	191205_191210_1	P5
1366	91.3043	All	p5_191205_191210_1_191210_a001	191205_191210_1	P5
1367	90.9091	All	p5_191205_191210_1_191210_a001	191205_191210_1	P5
1368	56.25	All	p5_191205_191210_1_191210_a001	191205_191210_1	P5
1369	71.4286	All	p5_191205_191210_1_191210_a001	191205_191210_1	P5
1370	46.1538	All	p5_191205_191210_1_191210_a001	191205_191210_1	P5
1371	70	All	p5_191205_191210_1_191210_a001	191205_191210_1	P5
1372	81.8182	All	p5_191205_191210_1_191210_a001	191205_191210_1	P5
1373	73.0769	All	p5_191205_191210_1_191210_a001	191205_191210_1	P5
1374	59.0909	All	p5_191205_191210_1_191210_a001	191205_191210_1	P5
1375	95	All	p5_191205_191210_1_191210_a001	191205_191210_1	P5
1376	87.0968	All	p5_191205_191210_1_191210_a001	191205_191210_1	P5
1377	92	All	p5_191205_191210_1_191210_a001	191205_191210_1	P5
1378	53.3333	All	p5_191205_191210_1_191210_a001	191205_191210_1	P5
1379	75	All	p5_191205_191210_1_191210_a001	191205_191210_1	P5
1380	61.9048	All	p5_191205_191210_1_191210_a001	191205_191210_1	P5
1381	85.7143	All	p5_191205_191210_1_191210_a001	191205_191210_1	P5
1382	78.5714	All	p5_191205_191210_1_191210_a001	191205_191210_1	P5
1383	100	All	p5_191205_191210_1_191210_a001	191205_191210_1	P5
1384	35	All	p5_191205_191210_1_191210_a001	191205_191210_1	P5
1385	83.3333	All	p5_191205_191210_1_191210_a001	191205_191210_1	P5
1386	87.5	All	p5_191205_191210_1_191210_a001	191205_191210_1	P5
1387	92.3077	All	p5_191205_191210_1_191210_a001	191205_191210_1	P5
1388	50	All	p5_191205_191210_1_191210_a001	191205_191210_1	P5
1389	50	All	p5_191205_191210_1_191210_a001	191205_191210_1	P5
1390	47.3684	All	p5_191205_191210_1_191210_a001	191205_191210_1	P5
1391	100	All	p5_191205_191210_1_191210_a001	191205_191210_1	P5
1392	88.8889	All	p5_191205_191210_1_191210_a001	191205_191210_1	P5
1393	58.8235	All	p5_191205_191210_1_191210_a001	191205_191210_1	P5
1394	76.4706	All	p5_191205_191210_1_191210_a001	191205_191210_1	P5
1395	50	All	p5_191205_191210_1_191210_a001	191205_191210_1	P5
1396	100	All	p5_191205_191210_1_191210_a001	191205_191210_1	P5
1397	50	All	p5_191205_191210_1_191210_a001	191205_191210_1	P5
1398	48.9362	All	p5_191205_191210_1_191210_a001	191205_191210_1	P5
1399	88.2353	All	p5_191205_191210_1_191210_a001	191205_191210_1	P5
1400	83.3333	All	p5_191205_191210_1_191210_a001	191205_191210_1	P5
1401	81.8182	All	p5_191205_191210_1_191210_a001	191205_191210_1	P5
1402	70	All	p5_191205_191210_1_191210_a001	191205_191210_1	P5
1403	88.8889	All	p5_191205_191210_1_191210_a001	191205_191210_1	P5
1404	100	All	p5_191205_191210_1_191210_a001	191205_191210_1	P5
1405	62.5	All	p5_191205_191210_1_191210_a001	191205_191210_1	P5
1406	71.4286	All	p5_191205_191210_1_191210_a001	191205_191210_1	P5
1407	94.7368	All	p5_191205_191210_1_191210_a001	191205_191210_1	P5
1408	60	All	p5_191205_191210_1_191210_a001	191205_191210_1	P5
1409	76.9231	All	p5_191205_191210_1_191210_a001	191205_191210_1	P5
1410	58.0645	All	p5_191205_191210_1_191210_a001	191205_191210_1	P5
1411	64.7059	All	p5_191205_191210_1_191210_a001	191205_191210_1	P5
1412	54.5455	All	p5_191205_191210_1_191210_a001	191205_191210_1	P5
1413	100	All	p5_191205_191210_1_191210_a001	191205_191210_1	P5
1414	52	All	p5_191205_191210_1_191210_a001	191205_191210_1	P5
1415	50	All	p5_191205_191210_1_191210_a001	191205_191210_1	P5
1416	36.1111	All	p5_191205_191210_1_191210_a001	191205_191210_1	P5
1417	78.5714	All	p5_191205_191210_1_191210_a001	191205_191210_1	P5
1418	64.2857	All	p5_191205_191210_1_191210_a001	191205_191210_1	P5
1419	23.0769	All	p5_191205_191210_1_191210_a001	191205_191210_1	P5
1420	76.4706	All	p5_191205_191210_1_191210_a001	191205_191210_1	P5
1421	84.2105	All	p5_191205_191210_1_191210_a001	191205_191210_1	P5
1422	42.8571	All	p5_191205_191210_1_191210_a001	191205_191210_1	P5
1423	100	All	p5_191205_191210_1_191210_a001	191205_191210_1	P5
1424	58.0645	All	p5_191205_191210_1_191210_a001	191205_191210_1	P5
1425	92.8571	All	p5_191205_191210_1_191210_a001	191205_191210_1	P5
1426	62.7907	All	p5_191205_191210_1_191210_a001	191205_191210_1	P5
1427	100	All	p5_191205_191210_1_191210_a001	191205_191210_1	P5
1428	100	All	p5_191205_191210_1_191210_a001	191205_191210_1	P5
1429	40.625	All	p5_191205_191210_1_191210_a001	191205_191210_1	P5
1430	78.7879	All	p5_191205_191210_1_191210_a001	191205_191210_1	P5
1431	80.9524	All	p5_191205_191210_1_191210_a001	191205_191210_1	P5
1432	76.1905	All	p5_191205_191210_1_191210_a001	191205_191210_1	P5
1433	86.6667	All	p5_191205_191210_1_191210_a001	191205_191210_1	P5
1434	40	All	p5_191205_191210_1_191210_a001	191205_191210_1	P5
1435	55.1724	All	p5_191205_191210_1_191210_a001	191205_191210_1	P5
1436	78.9474	All	p5_191205_191210_1_191210_a001	191205_191210_1	P5
1437	74.2857	All	p5_191205_191210_1_191210_a001	191205_191210_1	P5
1438	52.7778	All	p5_191205_191210_1_191210_a001	191205_191210_1	P5
1439	66.6667	All	p5_191205_191210_1_191210_a001	191205_191210_1	P5
1440	100	All	p5_191205_191210_1_191210_a001	191205_191210_1	P5
1441	90	All	p5_191205_191210_1_191210_a001	191205_191210_1	P5
1442	66.6667	All	p5_191205_191210_1_191210_a001	191205_191210_1	P5
1443	48.1481	All	p5_191205_191210_1_191210_a001	191205_191210_1	P5
1444	34.7826	All	p5_191205_191210_1_191210_a001	191205_191210_1	P5
1445	90	All	p5_191205_191210_1_191210_a001	191205_191210_1	P5
1446	60	All	p5_191205_191210_1_191210_a001	191205_191210_1	P5
1447	63.1579	All	p5_191205_191210_1_191210_a001	191205_191210_1	P5
1448	35	All	p5_191205_191210_1_191210_a001	191205_191210_1	P5
1449	46.1538	All	p5_191205_191210_1_191210_a001	191205_191210_1	P5
1450	92.3077	All	p5_191205_191210_1_191210_a001	191205_191210_1	P5
1451	72.7273	All	p5_191205_191210_1_191210_a001	191205_191210_1	P5
1452	67.7419	All	p5_191205_191210_1_191210_a001	191205_191210_1	P5
1453	68.75	All	p5_191205_191210_1_191210_a001	191205_191210_1	P5
1454	92.3077	All	p5_191205_191210_1_191210_a001	191205_191210_1	P5
1455	19.0476	All	p5_191205_191210_1_191210_a001	191205_191210_1	P5
1456	72.2222	All	p5_191205_191210_1_191210_a001	191205_191210_1	P5
1457	28	All	p5_191205_191210_1_191210_a001	191205_191210_1	P5
1458	61.9048	All	p5_191205_191210_1_191210_a001	191205_191210_1	P5
1459	57.8947	All	p5_191205_191210_1_191210_a001	191205_191210_1	P5
1460	92.8571	All	p5_191205_191210_1_191210_a001	191205_191210_1	P5
1461	78.125	All	p5_191205_191210_1_191210_a001	191205_191210_1	P5
1462	83.3333	All	p5_191205_191210_1_191210_a001	191205_191210_1	P5
1463	33.3333	All	p5_191205_191210_1_191210_a001	191205_191210_1	P5
1464	82.3529	All	p5_191205_191210_1_191210_a001	191205_191210_1	P5
1465	95	All	p5_191205_191210_1_191210_a001	191205_191210_1	P5
1466	85.7143	All	p5_191205_191210_1_191210_a001	191205_191210_1	P5
1467	56.25	All	p5_191205_191210_1_191210_a001	191205_191210_1	P5
1468	75	All	p5_191205_191210_1_191210_a001	191205_191210_1	P5
1469	86.6667	All	p5_191205_191210_1_191210_a001	191205_191210_1	P5
1470	45.4545	All	p5_191205_191210_1_191210_a001	191205_191210_1	P5
1471	90.4762	All	p5_191205_191210_1_191210_a001	191205_191210_1	P5
1472	78.9474	All	p5_191205_191210_1_191210_a001	191205_191210_1	P5
1473	38.0952	All	p5_191205_191210_1_191210_a001	191205_191210_1	P5
1474	50	All	p5_191205_191210_1_191210_a001	191205_191210_1	P5
1475	57.1429	All	p5_191205_191210_1_191210_a001	191205_191210_1	P5
1476	82.6087	All	p5_191205_191210_1_191210_a001	191205_191210_1	P5
1477	78.5714	All	p5_191205_191210_1_191210_a001	191205_191210_1	P5
1478	65.2174	All	p5_191205_191210_1_191210_a001	191205_191210_1	P5
1479	53.1915	All	p5_191205_191210_1_191210_a001	191205_191210_1	P5
1480	85	All	p5_191205_191210_1_191210_a001	191205_191210_1	P5
1481	42.8571	All	p5_191205_191210_1_191210_a001	191205_191210_1	P5
1482	84.2105	All	p5_191205_191210_1_191210_a001	191205_191210_1	P5
1483	66.6667	All	p5_191205_191210_1_191210_a001	191205_191210_1	P5
1484	82.6087	All	p5_191205_191210_1_191210_a001	191205_191210_1	P5
1485	75.8621	All	p5_191205_191210_1_191210_a001	191205_191210_1	P5
1486	83.3333	All	p5_191205_191210_1_191210_a001	191205_191210_1	P5
1487	87.5	All	p5_191205_191210_1_191210_a001	191205_191210_1	P5
1488	53.125	All	p5_191205_191210_1_191210_a001	191205_191210_1	P5
1489	42.8571	All	p5_191205_191210_1_191210_a001	191205_191210_1	P5
1490	64.2857	All	p5_191205_191210_1_191210_a001	191205_191210_1	P5
1491	81.25	All	p5_191205_191210_1_191210_a001	191205_191210_1	P5
1492	85.7143	All	p5_191205_191210_1_191210_a001	191205_191210_1	P5
1493	50	All	p5_191205_191210_1_191210_a001	191205_191210_1	P5
1494	76	All	p5_191205_191210_1_191210_a001	191205_191210_1	P5
1495	62.963	All	p5_191205_191210_1_191210_a001	191205_191210_1	P5
1496	56	All	p5_191205_191210_1_191210_a001	191205_191210_1	P5
1497	27.2727	All	p5_191205_191210_1_191210_a001	191205_191210_1	P5
1498	69.697	All	p5_191205_191210_1_191210_a001	191205_191210_1	P5
1499	62.8571	All	p5_191205_191210_1_191210_a001	191205_191210_1	P5
1500	52.7778	All	p5_191205_191210_1_191210_a001	191205_191210_1	P5
1501	30.5556	All	p5_191205_191210_1_191210_a001	191205_191210_1	P5
1502	80	All	p5_191205_191210_1_191210_a001	191205_191210_1	P5
1503	91.6667	All	p5_191205_191210_1_191210_a001	191205_191210_1	P5
1504	60	All	p5_191205_191210_1_191210_a001	191205_191210_1	P5
1505	85.7143	All	p5_191205_191210_1_191210_a001	191205_191210_1	P5
1506	73.3333	All	p5_191205_191210_1_191210_a001	191205_191210_1	P5
1507	51.4286	All	p5_191205_191210_1_191210_a001	191205_191210_1	P5
1508	90	All	p5_191205_191210_1_191210_a001	191205_191210_1	P5
1509	75	All	p5_191205_191210_1_191210_a001	191205_191210_1	P5
1510	53.8462	All	p5_191205_191210_1_191210_a001	191205_191210_1	P5
1511	54.5455	All	p5_191205_191210_1_191210_a001	191205_191210_1	P5
1512	21.7391	All	p5_191205_191210_1_191210_a001	191205_191210_1	P5
1513	90	All	p5_191205_191210_1_191210_a001	191205_191210_1	P5
1514	68	All	p5_191205_191210_1_191210_a001	191205_191210_1	P5
1515	84.2105	All	p5_200306_200311_200311_a000	200306_200311	P5
1516	36.3014	All	p5_200306_200311_200311_a000	200306_200311	P5
1517	75.1825	All	p5_200306_200311_200311_a000	200306_200311	P5
1518	77.1084	All	p5_200306_200311_200311_a000	200306_200311	P5
1519	8.33333	All	p5_200306_200311_200311_a000	200306_200311	P5
1520	84.2105	All	p5_200306_200311_200311_a000	200306_200311	P5
1521	35.0515	All	p5_200306_200311_200311_a000	200306_200311	P5
1522	39.8601	All	p5_200306_200311_200311_a000	200306_200311	P5
1523	78.6667	All	p5_200306_200311_200311_a000	200306_200311	P5
1524	37.1134	All	p5_200306_200311_200311_a000	200306_200311	P5
1525	40	All	p5_200306_200311_200311_a000	200306_200311	P5
1526	60	All	p5_200306_200311_200311_a000	200306_200311	P5
1527	86.5672	All	p5_200306_200311_200311_a000	200306_200311	P5
1528	52.9412	All	p5_200306_200311_200311_a000	200306_200311	P5
1529	82.4561	All	p5_200306_200311_200311_a000	200306_200311	P5
1530	73.2394	All	p5_200306_200311_200311_a000	200306_200311	P5
1531	100	All	p5_200306_200311_200311_a000	200306_200311	P5
1532	26.2712	All	p5_200306_200311_200311_a000	200306_200311	P5
1533	20	All	p5_200306_200311_200311_a000	200306_200311	P5
1534	75	All	p5_200306_200311_200311_a000	200306_200311	P5
1535	100	All	p5_200306_200311_200311_a000	200306_200311	P5
1536	11.3924	All	p5_200306_200311_200311_a000	200306_200311	P5
1537	100	All	p5_200306_200311_200311_a000	200306_200311	P5
1538	41.6667	All	p5_200306_200311_200311_a000	200306_200311	P5
1539	18.9189	All	p5_200306_200311_200311_a000	200306_200311	P5
1540	80	All	p5_200306_200311_200311_a000	200306_200311	P5
1541	93.5484	All	p5_200306_200311_200311_a000	200306_200311	P5
1542	83.8983	All	p5_200306_200311_200311_a000	200306_200311	P5
1543	74.7368	All	p5_200306_200311_200311_a000	200306_200311	P5
1544	14.0845	All	p5_200306_200311_200311_a000	200306_200311	P5
1545	29.4479	All	p5_200306_200311_200311_a000	200306_200311	P5
1546	45.9677	All	p5_200306_200311_200311_a000	200306_200311	P5
1547	59.375	All	p5_200306_200311_200311_a000	200306_200311	P5
1548	56.6434	All	p5_200306_200311_200311_a000	200306_200311	P5
1549	95.8333	All	p5_200306_200311_200311_a000	200306_200311	P5
1550	77.7778	All	p5_200306_200311_200311_a000	200306_200311	P5
1551	76.3158	All	p5_200306_200311_200311_a000	200306_200311	P5
1552	88.5246	All	p5_200306_200311_200311_a000	200306_200311	P5
1553	74.6269	All	p5_200306_200311_200311_a000	200306_200311	P5
1554	94.4444	All	p5_200306_200311_200311_a000	200306_200311	P5
1555	47.1698	All	p5_200306_200311_200311_a000	200306_200311	P5
1556	87.7551	All	p5_200306_200311_200311_a000	200306_200311	P5
1557	97.5309	All	p5_200306_200311_200311_a000	200306_200311	P5
1558	81.9672	All	p5_200306_200311_200311_a000	200306_200311	P5
1559	96.0784	All	p5_200306_200311_200311_a000	200306_200311	P5
1560	50	All	p5_200306_200311_200311_a000	200306_200311	P5
1561	90.9091	All	p5_200306_200311_200311_a000	200306_200311	P5
1562	58.4906	All	p5_200306_200311_200311_a000	200306_200311	P5
1563	90.5405	All	p5_200306_200311_200311_a000	200306_200311	P5
1564	77.5	All	p5_200306_200311_200311_a000	200306_200311	P5
1565	67.0455	All	p5_200306_200311_200311_a000	200306_200311	P5
1566	90.4762	All	p5_200306_200311_200311_a000	200306_200311	P5
1567	77.0115	All	p5_200306_200311_200311_a000	200306_200311	P5
1568	95	All	p5_200306_200311_200311_a000	200306_200311	P5
1569	81.1881	All	p5_200306_200311_200311_a000	200306_200311	P5
1570	26.2295	All	p5_200306_200311_200311_a000	200306_200311	P5
1571	95.082	All	p5_200306_200311_200311_a000	200306_200311	P5
1572	96.9697	All	p5_200306_200311_200311_a000	200306_200311	P5
1573	80.8219	All	p5_200306_200311_200311_a000	200306_200311	P5
1574	73.4375	All	p5_200306_200311_200311_a000	200306_200311	P5
1575	57.9268	All	p5_200306_200311_200311_a000	200306_200311	P5
1576	63.0769	All	p5_200306_200311_200311_a000	200306_200311	P5
1577	95.3125	All	p5_200306_200311_200311_a000	200306_200311	P5
1578	89.2857	All	p5_200306_200311_200311_a000	200306_200311	P5
1579	100	All	p5_200306_200311_200311_a000	200306_200311	P5
1580	73.0769	All	p5_200306_200311_200311_a000	200306_200311	P5
1581	61.6541	All	p5_200306_200311_200311_a000	200306_200311	P5
1582	54.3689	All	p5_200306_200311_200311_a000	200306_200311	P5
1583	52.2727	All	p5_200306_200311_200311_a000	200306_200311	P5
1584	61.165	All	p5_200306_200311_200311_a000	200306_200311	P5
1585	92.5926	All	p5_200306_200311_200311_a000	200306_200311	P5
1586	87.0588	All	p5_200306_200311_200311_a000	200306_200311	P5
1587	91.8919	All	p5_200306_200311_200311_a000	200306_200311	P5
1588	82.6087	All	p5_200306_200311_200311_a000	200306_200311	P5
1589	65.4206	All	p5_200306_200311_200311_a000	200306_200311	P5
1590	80	All	p5_200306_200311_200311_a000	200306_200311	P5
1591	50	All	p5_200306_200311_200311_a000	200306_200311	P5
1592	78.9474	All	p5_200306_200311_200311_a000	200306_200311	P5
1593	92.8571	All	p5_200306_200311_200311_a000	200306_200311	P5
1594	52.6316	All	p5_200306_200311_200311_a000	200306_200311	P5
1595	100	All	p5_200306_200311_200311_a000	200306_200311	P5
1596	94.4444	All	p5_200306_200311_200311_a000	200306_200311	P5
1597	100	All	p5_200306_200311_200311_a000	200306_200311	P5
1598	68.3673	All	p5_200306_200311_200311_a000	200306_200311	P5
1599	34.2105	All	p5_200306_200311_200311_a000	200306_200311	P5
1600	29.4118	All	p5_200306_200311_200311_a000	200306_200311	P5
1601	36.3636	All	p5_200306_200311_200311_a000	200306_200311	P5
1602	69.6296	All	p5_200306_200311_200311_a000	200306_200311	P5
1603	61.9403	All	p5_200306_200311_200311_a000	200306_200311	P5
1604	45.3237	All	p5_200306_200311_200311_a000	200306_200311	P5
1605	32.2835	All	p5_200306_200311_200311_a000	200306_200311	P5
1606	73.3333	All	p5_200306_200311_200311_a000	200306_200311	P5
1607	49.2063	All	p5_200306_200311_200311_a000	200306_200311	P5
1608	40	All	p5_200306_200311_200311_a000	200306_200311	P5
1609	38.2353	All	p5_200306_200311_200311_a000	200306_200311	P5
1610	87.5	All	p5_200306_200311_200311_a000	200306_200311	P5
1611	72.8571	All	p5_200306_200311_200311_a000	200306_200311	P5
1612	32.8358	All	p5_200306_200311_200311_a000	200306_200311	P5
1613	18.9655	All	p5_200306_200311_200311_a000	200306_200311	P5
1614	50	All	p5_200306_200311_200311_a000	200306_200311	P5
1615	63.7681	All	p5_200306_200311_200311_a000	200306_200311	P5
1616	50.3401	All	p5_200306_200311_200311_a000	200306_200311	P5
1617	35.5072	All	p5_200306_200311_200311_a000	200306_200311	P5
1618	6.25	All	p5_200306_200311_200311_a000	200306_200311	P5
1619	58.4416	All	p5_200306_200311_200311_a000	200306_200311	P5
1620	49.4318	All	p5_200306_200311_200311_a000	200306_200311	P5
1621	19.2308	All	p5_200306_200311_200311_a000	200306_200311	P5
1622	80.4348	All	p5_200306_200311_200311_a000	200306_200311	P5
1623	60.2151	All	p5_200306_200311_200311_a000	200306_200311	P5
1624	38.7931	All	p5_200306_200311_200311_a000	200306_200311	P5
1625	62.0482	All	p5_200306_200311_200311_a000	200306_200311	P5
1626	34.6154	All	p5_200306_200311_200311_a000	200306_200311	P5
1627	68.4211	All	p5_200306_200311_200311_a000	200306_200311	P5
1628	65.7534	All	p5_200306_200311_200311_a000	200306_200311	P5
1629	57.377	All	p5_200306_200311_200311_a000	200306_200311	P5
1630	86.9565	All	p5_200306_200311_200311_a000	200306_200311	P5
1631	36.3636	All	p5_200306_200311_200311_a000	200306_200311	P5
1632	83.0508	All	p5_200306_200311_200311_a000	200306_200311	P5
1633	48.3871	All	p5_200306_200311_200311_a000	200306_200311	P5
1634	52.8302	All	p5_200306_200311_200311_a000	200306_200311	P5
1635	51.0067	All	p5_200306_200311_200311_a000	200306_200311	P5
1636	31.5436	All	p5_200306_200311_200311_a000	200306_200311	P5
1637	34.7222	All	p5_200306_200311_200311_a000	200306_200311	P5
1638	80.3279	All	p5_200306_200311_200311_a000	200306_200311	P5
1639	24.4444	All	p5_200306_200311_200311_a000	200306_200311	P5
1640	75.6098	All	p5_200306_200311_200311_a000	200306_200311	P5
1641	71.0526	All	p5_200306_200311_200311_a000	200306_200311	P5
1642	68.9394	All	p5_200306_200311_200311_a000	200306_200311	P5
1643	90	All	p5_200306_200311_200311_a000	200306_200311	P5
1644	82.5	All	p5_200306_200311_200311_a000	200306_200311	P5
1645	57.764	All	p5_200306_200311_200311_a000	200306_200311	P5
1646	46.875	All	p5_200306_200311_200311_a000	200306_200311	P5
1647	42.1384	All	p5_200306_200311_200311_a000	200306_200311	P5
1648	55.814	All	p5_200306_200311_200311_a000	200306_200311	P5
1649	67.9688	All	p5_200306_200311_200311_a000	200306_200311	P5
1650	62.5	All	p5_200306_200311_200311_a000	200306_200311	P5
1651	77.451	All	p5_200306_200311_200311_a000	200306_200311	P5
1652	52.1127	All	p5_200306_200311_200311_a000	200306_200311	P5
1653	71.1712	All	p5_200306_200311_200311_a000	200306_200311	P5
1654	63.0058	All	p5_200306_200311_200311_a000	200306_200311	P5
1655	41.3793	All	p5_200306_200311_200311_a000	200306_200311	P5
1656	21.6418	All	p5_200306_200311_200311_a000	200306_200311	P5
1657	30.4878	All	p5_200306_200311_200311_a000	200306_200311	P5
1658	79.7101	All	p5_200306_200311_200311_a000	200306_200311	P5
1659	35.8696	All	p5_200306_200311_200311_a000	200306_200311	P5
1660	64.0244	All	p5_200306_200311_200311_a000	200306_200311	P5
1661	54.0984	All	p5_200306_200311_200311_a000	200306_200311	P5
1662	59.1549	All	p5_200306_200311_200311_a000	200306_200311	P5
1663	25.7143	All	p5_200306_200311_200311_a000	200306_200311	P5
1664	89.8305	All	p5_200306_200311_200311_a000	200306_200311	P5
1665	64.8148	All	p5_200306_200311_200311_a000	200306_200311	P5
1666	28	All	p5_200306_200311_200311_a000	200306_200311	P5
1667	27.2727	All	p5_200306_200311_200311_a000	200306_200311	P5
1668	49.4382	All	p5_200306_200311_200311_a000	200306_200311	P5
1669	59.3023	All	p5_200306_200311_200311_a000	200306_200311	P5
1670	15.1515	All	p5_200306_200311_200311_a000	200306_200311	P5
1671	54.321	All	p5_200306_200311_200311_a000	200306_200311	P5
1672	44.4444	All	p5_200306_200311_200311_a000	200306_200311	P5
1673	40.708	All	p5_200306_200311_200311_a000	200306_200311	P5
1674	47.2727	All	p5_200306_200311_200311_a000	200306_200311	P5
1675	66.0377	All	p5_200306_200311_200311_a000	200306_200311	P5
1676	5	All	p5_200306_200311_200311_a000	200306_200311	P5
1677	65.7534	All	p5_200306_200311_200311_a000	200306_200311	P5
1678	82.4176	All	p5_200306_200311_200311_a000	200306_200311	P5
1679	78.9474	All	p5_200306_200311_200311_a000	200306_200311	P5
1680	71.8519	All	p5_200306_200311_200311_a000	200306_200311	P5
1681	57.8571	All	p5_200306_200311_200311_a000	200306_200311	P5
1682	28.3333	All	p5_200306_200311_200311_a000	200306_200311	P5
1683	49.2063	All	p5_200306_200311_200311_a000	200306_200311	P5
1684	24.7619	All	p5_200306_200311_200311_a000	200306_200311	P5
1685	49.4318	All	p5_200306_200311_200311_a000	200306_200311	P5
1686	80.4348	All	p5_200306_200311_200311_a000	200306_200311	P5
1687	64.4172	All	p5_200306_200311_200311_a000	200306_200311	P5
1688	86.8132	All	p5_200306_200311_200311_a000	200306_200311	P5
1689	81.3187	All	p5_200306_200311_200311_a000	200306_200311	P5
1690	54.3046	All	p5_200306_200311_200311_a000	200306_200311	P5
1691	24.0602	All	p5_200306_200311_200311_a000	200306_200311	P5
1692	63.1579	All	p5_200306_200311_200311_a000	200306_200311	P5
1693	90	All	p5_200306_200311_200311_a000	200306_200311	P5
1694	42.1384	All	p5_200306_200311_200311_a000	200306_200311	P5
1695	71.1712	All	p5_200306_200311_200311_a000	200306_200311	P5
1696	46.5839	All	p5_200306_200311_200311_a000	200306_200311	P5
1697	41.3793	All	p5_200306_200311_200311_a000	200306_200311	P5
1698	71.5152	All	p5_200306_200311_200311_a000	200306_200311	P5
1699	65.2482	All	p5_200306_200311_200311_a000	200306_200311	P5
1700	54.0984	All	p5_200306_200311_200311_a000	200306_200311	P5
1701	59.1549	All	p5_200306_200311_200311_a000	200306_200311	P5
1702	85.2459	All	p5_200306_200311_200311_a000	200306_200311	P5
1703	61.9469	All	p5_200306_200311_200311_a000	200306_200311	P5
1704	90.4348	All	p5_200306_200311_200311_a000	200306_200311	P5
1705	80.1527	All	p5_200306_200311_200311_a000	200306_200311	P5
1706	59.3023	All	p5_200306_200311_200311_a000	200306_200311	P5
1707	16.6667	All	p5_200306_200311_200311_a000	200306_200311	P5
1708	38.7097	All	p5_200306_200311_200311_a000	200306_200311	P5
1709	46.7213	All	p5_200306_200311_200311_a000	200306_200311	P5
1710	5	All	p5_200306_200311_200311_a000	200306_200311	P5
1711	65.7534	All	p5_200306_200311_200311_a000	200306_200311	P5
1712	82.4176	All	p5_200306_200311_200311_a000	200306_200311	P5
1713	50	All	p5_200306_200311_200311_a000	200306_200311	P5
1714	33.3333	All	p5_200306_200311_200311_a000	200306_200311	P5
1715	36.3636	All	p5_200306_200311_200311_a000	200306_200311	P5
1716	46.3235	All	p5_200306_200311_200311_a000	200306_200311	P5
1717	28.3333	All	p5_200306_200311_200311_a000	200306_200311	P5
1718	47.619	All	p5_200306_200311_200311_a000	200306_200311	P5
1719	25	All	p5_200306_200311_200311_a000	200306_200311	P5
1720	33.3333	All	p5_200306_200311_200311_a000	200306_200311	P5
1721	87.5	All	p5_200306_200311_200311_a000	200306_200311	P5
1722	48.8764	All	p5_200306_200311_200311_a000	200306_200311	P5
1723	35.0318	All	p5_200306_200311_200311_a000	200306_200311	P5
1724	69.9248	All	p5_200306_200311_200311_a000	200306_200311	P5
1725	54.6875	All	p5_200306_200311_200311_a000	200306_200311	P5
1726	17.2414	All	p5_200306_200311_200311_a000	200306_200311	P5
1727	68.4211	All	p5_200306_200311_200311_a000	200306_200311	P5
1728	75.4386	All	p5_200306_200311_200311_a000	200306_200311	P5
1729	48.3871	All	p5_200306_200311_200311_a000	200306_200311	P5
1730	51.0067	All	p5_200306_200311_200311_a000	200306_200311	P5
1731	24.4444	All	p5_200306_200311_200311_a000	200306_200311	P5
1732	79.5699	All	p5_200306_200311_200311_a000	200306_200311	P5
1733	63.1579	All	p5_200306_200311_200311_a000	200306_200311	P5
1734	62.2222	All	p5_200306_200311_200311_a000	200306_200311	P5
1735	90	All	p5_200306_200311_200311_a000	200306_200311	P5
1736	86.8421	All	p5_200306_200311_200311_a000	200306_200311	P5
1737	42.6752	All	p5_200306_200311_200311_a000	200306_200311	P5
1738	38.4615	All	p5_200306_200311_200311_a000	200306_200311	P5
1739	94.0678	All	p5_200306_200311_200311_a000	200306_200311	P5
1740	55.8333	All	p5_200306_200311_200311_a000	200306_200311	P5
1741	19.8198	All	p5_200306_200311_200311_a000	200306_200311	P5
1742	59.1549	All	p5_200306_200311_200311_a000	200306_200311	P5
1743	64.8148	All	p5_200306_200311_200311_a000	200306_200311	P5
1744	72.4638	All	p5_200306_200311_200311_a000	200306_200311	P5
1745	20.7407	All	p5_200306_200311_200311_a000	200306_200311	P5
1746	44.4444	All	p5_200306_200311_200311_a000	200306_200311	P5
1747	5	All	p5_200306_200311_200311_a000	200306_200311	P5
1748	78.9474	All	p5_200306_200311_200311_a000	200306_200311	P5
1749	25	All	p5_200306_200311_200311_a000	200306_200311	P5
1750	42.1384	All	p5_200306_200311_200311_a000	200306_200311	P5
1751	54.1667	All	p5_200306_200311_200311_a000	200306_200311	P5
1752	51	All	p5_200306_200311_200311_a000	200306_200311	P5
1753	45.9893	All	p5_200306_200311_200311_a000	200306_200311	P5
1754	82.4176	All	p5_200306_200311_200311_a000	200306_200311	P5
1755	78.9474	All	p5_200306_200311_200311_a000	200306_200311	P5
1756	36.5079	All	p5_200306_200311_200311_a000	200306_200311	P5
1757	68.8889	All	p5_200306_200311_200311_a000	200306_200311	P5
1758	28.3333	All	p5_200306_200311_200311_a000	200306_200311	P5
1759	63.7681	All	p5_200306_200311_200311_a000	200306_200311	P5
1760	46.9274	All	p5_200306_200311_200311_a000	200306_200311	P5
1761	79.3478	All	p5_200306_200311_200311_a000	200306_200311	P5
1762	60.9195	All	p5_200306_200311_200311_a000	200306_200311	P5
1763	50.6098	All	p5_200306_200311_200311_a000	200306_200311	P5
1764	65.1515	All	p5_200306_200311_200311_a000	200306_200311	P5
1765	81.3187	All	p5_200306_200311_200311_a000	200306_200311	P5
1766	83.0508	All	p5_200306_200311_200311_a000	200306_200311	P5
1767	61.2903	All	p5_200306_200311_200311_a000	200306_200311	P5
1768	51.0067	All	p5_200306_200311_200311_a000	200306_200311	P5
1769	79.5699	All	p5_200306_200311_200311_a000	200306_200311	P5
1770	68.2171	All	p5_200306_200311_200311_a000	200306_200311	P5
1771	90	All	p5_200306_200311_200311_a000	200306_200311	P5
1772	82.5	All	p5_200306_200311_200311_a000	200306_200311	P5
1773	42.9487	All	p5_200306_200311_200311_a000	200306_200311	P5
1774	63.6872	All	p5_200306_200311_200311_a000	200306_200311	P5
1775	69.3878	All	p5_200306_200311_200311_a000	200306_200311	P5
1776	56.5476	All	p5_200306_200311_200311_a000	200306_200311	P5
1777	38.7755	All	p5_200306_200311_200311_a000	200306_200311	P5
1778	47.561	All	p5_200306_200311_200311_a000	200306_200311	P5
1779	94.1176	All	p5_200306_200311_200311_a000	200306_200311	P5
1780	65.2482	All	p5_200306_200311_200311_a000	200306_200311	P5
1781	55.8333	All	p5_200306_200311_200311_a000	200306_200311	P5
1782	59.1549	All	p5_200306_200311_200311_a000	200306_200311	P5
1783	82.0225	All	p5_200306_200311_200311_a000	200306_200311	P5
1784	86.9565	All	p5_200306_200311_200311_a000	200306_200311	P5
1785	60.479	All	p5_200306_200311_200311_a000	200306_200311	P5
1786	16.6667	All	p5_200306_200311_200311_a000	200306_200311	P5
1787	45.9893	All	p5_200306_200311_200311_a000	200306_200311	P5
1788	50	All	p5_200306_200311_200311_a000	200306_200311	P5
1789	64.4231	All	p5_200306_200311_200311_a000	200306_200311	P5
1790	65.3226	All	p5_200306_200311_200311_a000	200306_200311	P5
1791	82.4176	All	p5_200306_200311_200311_a000	200306_200311	P5
1792	76.1905	All	p5_200306_200311_200311_a000	200306_200311	P5
1793	94.4444	All	p5_200306_200311_200311_a000	200306_200311	P5
1794	38.0531	All	p5_200306_200311_200311_a001	200306_200311	P5
1795	39.2857	All	p5_200306_200311_200311_a001	200306_200311	P5
1796	15.3846	All	p5_200306_200311_200311_a001	200306_200311	P5
1797	40	All	p5_200306_200311_200311_a001	200306_200311	P5
1798	100	All	p5_200306_200311_200311_a001	200306_200311	P5
1799	28.8462	All	p5_200306_200311_200311_a001	200306_200311	P5
1800	16.3934	All	p5_200306_200311_200311_a001	200306_200311	P5
1801	6.25	All	p5_200306_200311_200311_a001	200306_200311	P5
1802	40	All	p5_200306_200311_200311_a001	200306_200311	P5
1803	14.2857	All	p5_200306_200311_200311_a001	200306_200311	P5
1804	23.0769	All	p5_200306_200311_200311_a001	200306_200311	P5
1805	90.4762	All	p5_200306_200311_200311_a001	200306_200311	P5
1806	26.9663	All	p5_200306_200311_200311_a001	200306_200311	P5
1807	20	All	p5_200306_200311_200311_a001	200306_200311	P5
1808	96.875	All	p5_200306_200311_200311_a001	200306_200311	P5
1809	5.19481	All	p5_200306_200311_200311_a001	200306_200311	P5
1810	12.5	All	p5_200306_200311_200311_a001	200306_200311	P5
1811	28.5714	All	p5_200306_200311_200311_a001	200306_200311	P5
1812	100	All	p5_200306_200311_200311_a001	200306_200311	P5
1813	63.6364	All	p5_200306_200311_200311_a001	200306_200311	P5
1814	57.5342	All	p5_200306_200311_200311_a001	200306_200311	P5
1815	100	All	p5_200306_200311_200311_a001	200306_200311	P5
1816	81.1594	All	p5_200306_200311_200311_a001	200306_200311	P5
1817	77.2727	All	p5_200306_200311_200311_a001	200306_200311	P5
1818	96.7742	All	p5_200306_200311_200311_a001	200306_200311	P5
1819	27.7778	All	p5_200306_200311_200311_a001	200306_200311	P5
1820	100	All	p5_200306_200311_200311_a001	200306_200311	P5
1821	100	All	p5_200306_200311_200311_a001	200306_200311	P5
1822	100	All	p5_200306_200311_200311_a001	200306_200311	P5
1823	98.0392	All	p5_200306_200311_200311_a001	200306_200311	P5
1824	41.6667	All	p5_200306_200311_200311_a001	200306_200311	P5
1825	21.4286	All	p5_200306_200311_200311_a001	200306_200311	P5
1826	42.6966	All	p5_200306_200311_200311_a001	200306_200311	P5
1827	79.3103	All	p5_200306_200311_200311_a001	200306_200311	P5
1828	83.3333	All	p5_200306_200311_200311_a001	200306_200311	P5
1829	83.1169	All	p5_200306_200311_200311_a001	200306_200311	P5
1830	60.2941	All	p5_200306_200311_200311_a001	200306_200311	P5
1831	47.5524	All	p5_200306_200311_200311_a001	200306_200311	P5
1832	35	All	p5_200306_200311_200311_a001	200306_200311	P5
1833	100	All	p5_200306_200311_200311_a001	200306_200311	P5
1834	100	All	p5_200306_200311_200311_a001	200306_200311	P5
1835	84.4828	All	p5_200306_200311_200311_a001	200306_200311	P5
1836	85.2941	All	p5_200306_200311_200311_a001	200306_200311	P5
1837	34.3284	All	p5_200306_200311_200311_a001	200306_200311	P5
1838	77.0833	All	p5_200306_200311_200311_a001	200306_200311	P5
1839	44.186	All	p5_200306_200311_200311_a001	200306_200311	P5
1840	90.566	All	p5_200306_200311_200311_a001	200306_200311	P5
1841	8.69565	All	p5_200306_200311_200311_a001	200306_200311	P5
1842	62.5	All	p5_200306_200311_200311_a001	200306_200311	P5
1843	92.3077	All	p5_200306_200311_200311_a001	200306_200311	P5
1844	97.561	All	p5_200306_200311_200311_a001	200306_200311	P5
1845	82.0513	All	p5_200306_200311_200311_a001	200306_200311	P5
1846	20.2703	All	p5_200306_200311_200311_a001	200306_200311	P5
1847	87.5	All	p5_200306_200311_200311_a001	200306_200311	P5
1848	33.3333	All	p5_200306_200311_200311_a001	200306_200311	P5
1849	79.3103	All	p5_200306_200311_200311_a001	200306_200311	P5
1850	78.3505	All	p5_200306_200311_200311_a001	200306_200311	P5
1851	17.3913	All	p5_200306_200311_200311_a001	200306_200311	P5
1852	8.10811	All	p5_200306_200311_200311_a001	200306_200311	P5
1853	10.3448	All	p5_200306_200311_200311_a001	200306_200311	P5
1854	25	All	p5_200306_200311_200311_a001	200306_200311	P5
1855	60.4167	All	p5_200306_200311_200311_a001	200306_200311	P5
1856	74.359	All	p5_200306_200311_200311_a001	200306_200311	P5
1857	26.9841	All	p5_200306_200311_200311_a001	200306_200311	P5
1858	85.7143	All	p5_200306_200311_200311_a001	200306_200311	P5
1859	71.9101	All	p5_200306_200311_200311_a001	200306_200311	P5
1860	77.9221	All	p5_200306_200311_200311_a001	200306_200311	P5
1861	13.4328	All	p5_200306_200311_200311_a001	200306_200311	P5
1862	58.8235	All	p5_200306_200311_200311_a001	200306_200311	P5
1863	79.3814	All	p5_200306_200311_200311_a001	200306_200311	P5
1864	46.9388	All	p5_200306_200311_200311_a001	200306_200311	P5
1865	68.4211	All	p5_200306_200311_200311_a001	200306_200311	P5
1866	90.9091	All	p5_200306_200311_200311_a001	200306_200311	P5
1867	78.7234	All	p5_200306_200311_200311_a001	200306_200311	P5
1868	87.7778	All	p5_200306_200311_200311_a001	200306_200311	P5
1869	28.5714	All	p5_200306_200311_200311_a001	200306_200311	P5
1870	16.6667	All	p5_200306_200311_200311_a001	200306_200311	P5
1871	78.125	All	p5_200306_200311_200311_a001	200306_200311	P5
1872	15.1515	All	p5_200306_200311_200311_a001	200306_200311	P5
1873	78.3505	All	p5_200306_200311_200311_a001	200306_200311	P5
1874	46.3918	All	p5_200306_200311_200311_a001	200306_200311	P5
1875	21.4286	All	p5_200306_200311_200311_a001	200306_200311	P5
1876	85.7143	All	p5_200306_200311_200311_a001	200306_200311	P5
1877	76.3441	All	p5_200306_200311_200311_a001	200306_200311	P5
1878	31.9444	All	p5_200306_200311_200311_a001	200306_200311	P5
1879	90.1639	All	p5_200306_200311_200311_a001	200306_200311	P5
1880	18.1818	All	p5_200306_200311_200311_a001	200306_200311	P5
1881	68.75	All	p5_200306_200311_200311_a001	200306_200311	P5
1882	41.9048	All	p5_200306_200311_200311_a001	200306_200311	P5
1883	16.8539	All	p5_200306_200311_200311_a001	200306_200311	P5
1884	86.3636	All	p5_200306_200311_200311_a001	200306_200311	P5
1885	97	All	p5_200306_200311_200311_a001	200306_200311	P5
1886	51.3761	All	p5_200306_200311_200311_a001	200306_200311	P5
1887	65.2174	All	p5_200306_200311_200311_a001	200306_200311	P5
1888	46.9027	All	p5_200306_200311_200311_a001	200306_200311	P5
1889	6.81818	All	p5_200306_200311_200311_a001	200306_200311	P5
1890	100	All	p5_200306_200311_200311_a001	200306_200311	P5
1891	71.4286	All	p5_200306_200311_200311_a001	200306_200311	P5
1892	64.6018	All	p5_200306_200311_200311_a001	200306_200311	P5
1893	49.1803	All	p5_200306_200311_200311_a001	200306_200311	P5
1894	35.2273	All	p5_200306_200311_200311_a001	200306_200311	P5
1895	39.7436	All	p5_200306_200311_200311_a001	200306_200311	P5
1896	30.7692	All	p5_200306_200311_200311_a001	200306_200311	P5
1897	25	All	p5_200306_200311_200311_a001	200306_200311	P5
1898	11.4286	All	p5_200306_200311_200311_a001	200306_200311	P5
1899	36.1905	All	p5_200306_200311_200311_a001	200306_200311	P5
1900	23.6559	All	p5_200306_200311_200311_a001	200306_200311	P5
1901	96.4912	All	p5_200306_200311_200311_a001	200306_200311	P5
1902	37.2881	All	p5_200306_200311_200311_a001	200306_200311	P5
1903	17.6471	All	p5_200306_200311_200311_a001	200306_200311	P5
1904	68.75	All	p5_200306_200311_200311_a001	200306_200311	P5
1905	75.5556	All	p5_200306_200311_200311_a001	200306_200311	P5
1906	85.9649	All	p5_200306_200311_200311_a001	200306_200311	P5
1907	81.9672	All	p5_200306_200311_200311_a001	200306_200311	P5
1908	72.1311	All	p5_200306_200311_200311_a001	200306_200311	P5
1909	18.6441	All	p5_200306_200311_200311_a001	200306_200311	P5
1910	35	All	p5_200306_200311_200311_a001	200306_200311	P5
1911	42.1769	All	p5_200306_200311_200311_a001	200306_200311	P5
1912	60	All	p5_200306_200311_200311_a001	200306_200311	P5
1913	55.5556	All	p5_200306_200311_200311_a001	200306_200311	P5
1914	44.1667	All	p5_200306_200311_200311_a001	200306_200311	P5
1915	100	All	p5_200306_200311_200311_a001	200306_200311	P5
1916	71.1864	All	p5_200306_200311_200311_a001	200306_200311	P5
1917	61.3636	All	p5_200306_200311_200311_a001	200306_200311	P5
1918	43.1818	All	p5_200306_200311_200311_a001	200306_200311	P5
1919	14.2857	All	p5_200306_200311_200311_a001	200306_200311	P5
1920	17.3913	All	p5_200306_200311_200311_a001	200306_200311	P5
1921	53.3333	All	p5_200306_200311_200311_a001	200306_200311	P5
1922	94.4444	All	p5_200306_200311_200311_a001	200306_200311	P5
1923	50.9804	All	p5_200306_200311_200311_a001	200306_200311	P5
1924	22.2222	All	p5_200306_200311_200311_a001	200306_200311	P5
1925	90.566	All	p5_200306_200311_200311_a001	200306_200311	P5
1926	28.3019	All	p5_200306_200311_200311_a001	200306_200311	P5
1927	50	All	p5_200306_200311_200311_a001	200306_200311	P5
1928	41.9355	All	p5_200306_200311_200311_a001	200306_200311	P5
1929	19.6721	All	p5_200306_200311_200311_a001	200306_200311	P5
1930	35.4839	All	p5_200306_200311_200311_a001	200306_200311	P5
1931	64	All	p5_200306_200311_200311_a001	200306_200311	P5
1932	7.69231	All	p5_200306_200311_200311_a001	200306_200311	P5
1933	81.25	All	p5_200306_200311_200311_a001	200306_200311	P5
1934	94.7368	All	p5_200306_200311_200311_a001	200306_200311	P5
1935	0	All	p5_200306_200311_200311_a001	200306_200311	P5
1936	16.3265	All	p5_200306_200311_200311_a001	200306_200311	P5
1937	25	All	p5_200306_200311_200311_a001	200306_200311	P5
1938	100	All	p5_200306_200311_200311_a001	200306_200311	P5
1939	100	All	p5_200306_200311_200311_a001	200306_200311	P5
1940	38.7097	All	p5_200306_200311_200311_a001	200306_200311	P5
1941	92.8571	All	p5_200306_200311_200311_a001	200306_200311	P5
1942	50.7246	All	p5_200306_200311_200311_a001	200306_200311	P5
1943	16.4179	All	p5_200306_200311_200311_a001	200306_200311	P5
1944	13.6364	All	p5_200306_200311_200311_a001	200306_200311	P5
1945	83.3333	All	p5_200306_200311_200311_a001	200306_200311	P5
1946	87.1795	All	p5_200306_200311_200311_a001	200306_200311	P5
1947	64.5161	All	p5_200306_200311_200311_a001	200306_200311	P5
1948	0	All	p5_200306_200311_200311_a001	200306_200311	P5
1949	93.75	All	p5_200306_200311_200311_a001	200306_200311	P5
1950	67.3469	All	p5_200306_200311_200311_a001	200306_200311	P5
1951	43.2432	All	p5_200306_200311_200311_a001	200306_200311	P5
1952	37.7358	All	p5_200306_200311_200311_a001	200306_200311	P5
1953	51.7241	All	p5_200306_200311_200311_a001	200306_200311	P5
1954	81.7204	All	p5_200306_200311_200311_a001	200306_200311	P5
1955	84.4828	All	p5_200306_200311_200311_a001	200306_200311	P5
1956	91.6667	All	p5_200306_200311_200311_a001	200306_200311	P5
1957	78.3505	All	p5_200306_200311_200311_a001	200306_200311	P5
1958	92.8571	All	p5_200306_200311_200311_a001	200306_200311	P5
1959	24.2105	All	p5_200306_200311_200311_a001	200306_200311	P5
1960	25	All	p5_200306_200311_200311_a001	200306_200311	P5
1961	74.359	All	p5_200306_200311_200311_a001	200306_200311	P5
1962	71.9101	All	p5_200306_200311_200311_a001	200306_200311	P5
1963	58.8235	All	p5_200306_200311_200311_a001	200306_200311	P5
1964	53.6842	All	p5_200306_200311_200311_a001	200306_200311	P5
1965	74.5763	All	p5_200306_200311_200311_a001	200306_200311	P5
1966	32.7273	All	p5_200306_200311_200311_a001	200306_200311	P5
1967	25	All	p5_200306_200311_200311_a001	200306_200311	P5
1968	81.25	All	p5_200306_200311_200311_a001	200306_200311	P5
1969	85.7143	All	p5_200306_200311_200311_a001	200306_200311	P5
1970	39.726	All	p5_200306_200311_200311_a001	200306_200311	P5
1971	13.4615	All	p5_200306_200311_200311_a001	200306_200311	P5
1972	35.6436	All	p5_200306_200311_200311_a001	200306_200311	P5
1973	86.3636	All	p5_200306_200311_200311_a001	200306_200311	P5
1974	39.7436	All	p5_200306_200311_200311_a001	200306_200311	P5
1975	11.4286	All	p5_200306_200311_200311_a001	200306_200311	P5
1976	25.4902	All	p5_200306_200311_200311_a001	200306_200311	P5
1977	94.7368	All	p5_200306_200311_200311_a001	200306_200311	P5
1978	33.8983	All	p5_200306_200311_200311_a001	200306_200311	P5
1979	13.0435	All	p5_200306_200311_200311_a001	200306_200311	P5
1980	68.75	All	p5_200306_200311_200311_a001	200306_200311	P5
1981	39.8693	All	p5_200306_200311_200311_a001	200306_200311	P5
1982	69.6629	All	p5_200306_200311_200311_a001	200306_200311	P5
1983	14.2857	All	p5_200306_200311_200311_a001	200306_200311	P5
1984	14.2857	All	p5_200306_200311_200311_a001	200306_200311	P5
1985	53.3333	All	p5_200306_200311_200311_a001	200306_200311	P5
1986	60.7843	All	p5_200306_200311_200311_a001	200306_200311	P5
1987	19.2308	All	p5_200306_200311_200311_a001	200306_200311	P5
1988	22.2222	All	p5_200306_200311_200311_a001	200306_200311	P5
1989	28.3019	All	p5_200306_200311_200311_a001	200306_200311	P5
1990	40	All	p5_200306_200311_200311_a001	200306_200311	P5
1991	64	All	p5_200306_200311_200311_a001	200306_200311	P5
1992	11.5385	All	p5_200306_200311_200311_a001	200306_200311	P5
1993	94.7368	All	p5_200306_200311_200311_a001	200306_200311	P5
1994	27.5862	All	p5_200306_200311_200311_a001	200306_200311	P5
1995	38.7097	All	p5_200306_200311_200311_a001	200306_200311	P5
1996	68.4211	All	p5_200306_200311_200311_a001	200306_200311	P5
1997	11.4754	All	p5_200306_200311_200311_a001	200306_200311	P5
1998	92.8571	All	p5_200306_200311_200311_a001	200306_200311	P5
[truncated: 5,375 more rows]

## Sheet: average
Age	Mouse ID	% activation
5	190320_190325	80.9861
5	191205_191210_0	66.807
5	191205_191210_1	67.8359
5	200306_200311	59.0039
6	180201_180207	69.9111
6	190921_190927_1	62.0054
6	191205_191211_1	62.2457
7	180201_180208	56.8721
7	190226_190305	60.3971
7	190320_190327	66.15
7	200103_200110_0	54.0083
7	200206_200213	65.3962
8	181009_181017	68.4672
8	181016_181024	60.082
8	190921_190929_1	47.7306
8	191205_191213	55.1042
8	191212_191220	56.159
9	171211_171220	52.9926
9	190211_190220_0	65.1362
9	190305_190314	55.7836
9	190313_190322	44.5768
9	190921_190930	48.7605
10	190921_191001	40.7453
11	190921_191002	39.3153
12	171029_171110	42.6574
12	190828_190909	42.1697
12	190911_190923	42.7217
12	190921_191003	42.8309
12	191122_191204	40.2857
