# Supplementary material for: The rapid developmental rise of somatic inhibition disengages hippocampal dynamics from self-motion
Source: eLife journal article supplement (doi:10.7554/elife.78116), 2022-07-20
Supplement: supp [file activation_ratio_all_moves_table_adapted_v2.xlsx]

## Sheet: data
	Activity ratio	Celltype	Session	SubjectID	Group			ACTIVATOR	NEUTRAL	INHIBITOR
0	63.6364	All	p10_190921_191001_191001_a000	190921_191001	P10			1	0	0
1	49.1525	All	p10_190921_191001_191001_a000	190921_191001	P10			0	1	0
2	56.6038	All	p10_190921_191001_191001_a000	190921_191001	P10			0	1	0
3	23.5294	All	p10_190921_191001_191001_a000	190921_191001	P10			0	0	1
4	29.1667	All	p10_190921_191001_191001_a000	190921_191001	P10			0	0	1
5	66.6667	All	p10_190921_191001_191001_a000	190921_191001	P10			1	0	0
6	7.35294	All	p10_190921_191001_191001_a000	190921_191001	P10			0	0	1
7	34.2857	All	p10_190921_191001_191001_a000	190921_191001	P10			0	0	1
8	35.1852	All	p10_190921_191001_191001_a000	190921_191001	P10			0	0	1
9	65.1163	All	p10_190921_191001_191001_a000	190921_191001	P10			1	0	0
10	53.3333	All	p10_190921_191001_191001_a000	190921_191001	P10			0	1	0
11	88.4615	All	p10_190921_191001_191001_a000	190921_191001	P10			1	0	0
12	29.8246	All	p10_190921_191001_191001_a000	190921_191001	P10			0	0	1
13	26.3158	All	p10_190921_191001_191001_a000	190921_191001	P10			0	0	1
14	56	All	p10_190921_191001_191001_a000	190921_191001	P10			0	1	0
15	37.5	All	p10_190921_191001_191001_a000	190921_191001	P10			0	0	1
16	42.8571	All	p10_190921_191001_191001_a000	190921_191001	P10			0	1	0
17	38.961	All	p10_190921_191001_191001_a000	190921_191001	P10			0	0	1
18	44.4444	All	p10_190921_191001_191001_a000	190921_191001	P10			0	1	0
19	29.8246	All	p10_190921_191001_191001_a000	190921_191001	P10			0	0	1
20	53.8462	All	p10_190921_191001_191001_a000	190921_191001	P10			0	1	0
21	38.8889	All	p10_190921_191001_191001_a000	190921_191001	P10			0	0	1
22	35.9375	All	p10_190921_191001_191001_a000	190921_191001	P10			0	0	1
23	33.3333	All	p10_190921_191001_191001_a000	190921_191001	P10			0	0	1
24	53.4483	All	p10_190921_191001_191001_a000	190921_191001	P10			0	1	0
25	37.8049	All	p10_190921_191001_191001_a000	190921_191001	P10			0	0	1
26	24.5902	All	p10_190921_191001_191001_a000	190921_191001	P10			0	0	1
27	55.814	All	p10_190921_191001_191001_a000	190921_191001	P10			0	1	0
28	10.2041	All	p10_190921_191001_191001_a000	190921_191001	P10			0	0	1
29	47.1698	All	p10_190921_191001_191001_a000	190921_191001	P10			0	1	0
30	22.6415	All	p10_190921_191001_191001_a000	190921_191001	P10			0	0	1
31	43.1034	All	p10_190921_191001_191001_a000	190921_191001	P10			0	1	0
32	40.5405	All	p10_190921_191001_191001_a000	190921_191001	P10			0	1	0
33	39.4737	All	p10_190921_191001_191001_a000	190921_191001	P10			0	0	1
34	25.4902	All	p10_190921_191001_191001_a000	190921_191001	P10			0	0	1
35	28.3019	All	p10_190921_191001_191001_a000	190921_191001	P10			0	0	1
36	61.2903	All	p10_190921_191001_191001_a000	190921_191001	P10			1	0	0
37	49.2958	All	p10_190921_191001_191001_a000	190921_191001	P10			0	1	0
38	32.4324	All	p10_190921_191001_191001_a000	190921_191001	P10			0	0	1
39	40	All	p10_190921_191001_191001_a000	190921_191001	P10			0	1	0
40	26.087	All	p10_190921_191001_191001_a000	190921_191001	P10			0	0	1
41	39.1304	All	p10_190921_191001_191001_a000	190921_191001	P10			0	0	1
42	12.5	All	p10_190921_191001_191001_a000	190921_191001	P10			0	0	1
43	15.5556	All	p10_190921_191001_191001_a000	190921_191001	P10			0	0	1
44	79.4118	All	p10_190921_191001_191001_a000	190921_191001	P10			1	0	0
45	47.619	All	p10_190921_191001_191001_a000	190921_191001	P10			0	1	0
46	19.4444	All	p10_190921_191001_191001_a000	190921_191001	P10			0	0	1
47	48.7179	All	p10_190921_191001_191001_a000	190921_191001	P10			0	1	0
48	52.5	All	p10_190921_191001_191001_a000	190921_191001	P10			0	1	0
49	88.8889	All	p10_190921_191001_191001_a000	190921_191001	P10			1	0	0
50	65.7895	All	p10_190921_191001_191001_a000	190921_191001	P10			1	0	0
51	47.8261	All	p10_190921_191001_191001_a000	190921_191001	P10			0	1	0
52	47.1698	All	p10_190921_191001_191001_a000	190921_191001	P10			0	1	0
53	42.5532	All	p10_190921_191001_191001_a000	190921_191001	P10			0	1	0
54	78.2609	All	p10_190921_191001_191001_a000	190921_191001	P10			1	0	0
55	22.2222	All	p10_190921_191001_191001_a000	190921_191001	P10			0	0	1
56	48.7805	All	p10_190921_191001_191001_a000	190921_191001	P10			0	1	0
57	33.3333	All	p10_190921_191001_191001_a000	190921_191001	P10			0	0	1
58	35.0877	All	p10_190921_191001_191001_a000	190921_191001	P10			0	0	1
59	32.2581	All	p10_190921_191001_191001_a000	190921_191001	P10			0	0	1
60	39.1304	All	p10_190921_191001_191001_a000	190921_191001	P10			0	0	1
61	25	All	p10_190921_191001_191001_a000	190921_191001	P10			0	0	1
62	65	All	p10_190921_191001_191001_a000	190921_191001	P10			1	0	0
63	29.4118	All	p10_190921_191001_191001_a000	190921_191001	P10			0	0	1
64	60.4167	All	p10_190921_191001_191001_a000	190921_191001	P10			1	0	0
65	58.0645	All	p10_190921_191001_191001_a000	190921_191001	P10			0	1	0
66	37.5	All	p10_190921_191001_191001_a000	190921_191001	P10			0	0	1
67	36.9231	All	p10_190921_191001_191001_a000	190921_191001	P10			0	0	1
68	19.2982	All	p10_190921_191001_191001_a000	190921_191001	P10			0	0	1
69	24.3902	All	p10_190921_191001_191001_a000	190921_191001	P10			0	0	1
70	34.0426	All	p10_190921_191001_191001_a000	190921_191001	P10			0	0	1
71	29.8507	All	p10_190921_191001_191001_a000	190921_191001	P10			0	0	1
72	26.6667	All	p10_190921_191001_191001_a000	190921_191001	P10			0	0	1
73	40.7407	All	p10_190921_191001_191001_a000	190921_191001	P10			0	1	0
74	23.5294	All	p10_190921_191001_191001_a000	190921_191001	P10			0	0	1
75	53.1915	All	p10_190921_191001_191001_a000	190921_191001	P10			0	1	0
76	26.8293	All	p10_190921_191001_191001_a000	190921_191001	P10			0	0	1
77	22.2222	All	p10_190921_191001_191001_a000	190921_191001	P10			0	0	1
78	26.5306	All	p10_190921_191001_191001_a000	190921_191001	P10			0	0	1
79	37.5	All	p10_190921_191001_191001_a000	190921_191001	P10			0	0	1
80	35.4839	All	p10_190921_191001_191001_a000	190921_191001	P10			0	0	1
81	55.1724	All	p10_190921_191001_191001_a000	190921_191001	P10			0	1	0
82	40	All	p10_190921_191001_191001_a000	190921_191001	P10			0	1	0
83	29	All	p11_190921_191002_191002_a001	190921_191002	P11			0	0	1
84	51.7857	All	p11_190921_191002_191002_a001	190921_191002	P11			0	1	0
85	35.443	All	p11_190921_191002_191002_a001	190921_191002	P11			0	0	1
86	33.3333	All	p11_190921_191002_191002_a001	190921_191002	P11			0	0	1
87	86.7925	All	p11_190921_191002_191002_a001	190921_191002	P11			1	0	0
88	57.1429	All	p11_190921_191002_191002_a001	190921_191002	P11			0	1	0
89	53.2258	All	p11_190921_191002_191002_a001	190921_191002	P11			0	1	0
90	22.9885	All	p11_190921_191002_191002_a001	190921_191002	P11			0	0	1
91	25.6757	All	p11_190921_191002_191002_a001	190921_191002	P11			0	0	1
92	30.4348	All	p11_190921_191002_191002_a001	190921_191002	P11			0	0	1
93	81.8182	All	p11_190921_191002_191002_a001	190921_191002	P11			1	0	0
94	41.9753	All	p11_190921_191002_191002_a001	190921_191002	P11			0	1	0
95	20.4545	All	p11_190921_191002_191002_a001	190921_191002	P11			0	0	1
96	30	All	p11_190921_191002_191002_a001	190921_191002	P11			0	0	1
97	29.4118	All	p11_190921_191002_191002_a001	190921_191002	P11			0	0	1
98	41.8182	All	p11_190921_191002_191002_a001	190921_191002	P11			0	1	0
99	46.9388	All	p11_190921_191002_191002_a001	190921_191002	P11			0	1	0
100	94.5946	All	p11_190921_191002_191002_a001	190921_191002	P11			1	0	0
101	20	All	p11_190921_191002_191002_a001	190921_191002	P11			0	0	1
102	31.4815	All	p11_190921_191002_191002_a001	190921_191002	P11			0	0	1
103	24.3902	All	p11_190921_191002_191002_a001	190921_191002	P11			0	0	1
104	41.5842	All	p11_190921_191002_191002_a001	190921_191002	P11			0	1	0
105	42.1053	All	p11_190921_191002_191002_a001	190921_191002	P11			0	1	0
106	57.8947	All	p11_190921_191002_191002_a001	190921_191002	P11			0	1	0
107	83.1325	All	p11_190921_191002_191002_a001	190921_191002	P11			1	0	0
108	34.9206	All	p11_190921_191002_191002_a001	190921_191002	P11			0	0	1
109	45.4545	All	p11_190921_191002_191002_a001	190921_191002	P11			0	1	0
110	17.4603	All	p11_190921_191002_191002_a001	190921_191002	P11			0	0	1
111	46.6667	All	p11_190921_191002_191002_a001	190921_191002	P11			0	1	0
112	23.7288	All	p11_190921_191002_191002_a001	190921_191002	P11			0	0	1
113	34.2857	All	p11_190921_191002_191002_a001	190921_191002	P11			0	0	1
114	22.5806	All	p11_190921_191002_191002_a001	190921_191002	P11			0	0	1
115	39.3617	All	p11_190921_191002_191002_a001	190921_191002	P11			0	0	1
116	21.0526	All	p11_190921_191002_191002_a001	190921_191002	P11			0	0	1
117	10.3448	All	p11_190921_191002_191002_a001	190921_191002	P11			0	0	1
118	30.8642	All	p11_190921_191002_191002_a001	190921_191002	P11			0	0	1
119	27.6923	All	p11_190921_191002_191002_a001	190921_191002	P11			0	0	1
120	32.3529	All	p11_190921_191002_191002_a001	190921_191002	P11			0	0	1
121	37.7049	All	p11_190921_191002_191002_a001	190921_191002	P11			0	0	1
122	92.0635	All	p11_190921_191002_191002_a001	190921_191002	P11			1	0	0
123	47	All	p11_190921_191002_191002_a001	190921_191002	P11			0	1	0
124	23.8095	All	p11_190921_191002_191002_a001	190921_191002	P11			0	0	1
125	43.1034	All	p11_190921_191002_191002_a001	190921_191002	P11			0	1	0
126	14.2857	All	p11_190921_191002_191002_a001	190921_191002	P11			0	0	1
127	33.3333	All	p11_190921_191002_191002_a001	190921_191002	P11			0	0	1
128	38.7755	All	p11_190921_191002_191002_a001	190921_191002	P11			0	0	1
129	15.3846	All	p11_190921_191002_191002_a001	190921_191002	P11			0	0	1
130	48.4375	All	p11_190921_191002_191002_a001	190921_191002	P11			0	1	0
131	12.5	All	p11_190921_191002_191002_a001	190921_191002	P11			0	0	1
132	45.283	All	p11_190921_191002_191002_a001	190921_191002	P11			0	1	0
133	36.6337	All	p11_190921_191002_191002_a001	190921_191002	P11			0	0	1
134	42.3077	All	p11_190921_191002_191002_a001	190921_191002	P11			0	1	0
135	53.5714	All	p11_190921_191002_191002_a001	190921_191002	P11			0	1	0
136	22	All	p11_190921_191002_191002_a001	190921_191002	P11			0	0	1
137	27.5362	All	p11_190921_191002_191002_a001	190921_191002	P11			0	0	1
138	64.8649	All	p11_190921_191002_191002_a001	190921_191002	P11			1	0	0
139	42.1875	All	p11_190921_191002_191002_a001	190921_191002	P11			0	1	0
140	26.087	All	p12_171029_171110_171110_a000	171029_171110	P12			0	0	1
141	42.5532	All	p12_171029_171110_171110_a000	171029_171110	P12			0	1	0
142	36.1702	All	p12_171029_171110_171110_a000	171029_171110	P12			0	0	1
143	83.3333	All	p12_171029_171110_171110_a000	171029_171110	P12			1	0	0
144	36.7347	All	p12_171029_171110_171110_a000	171029_171110	P12			0	0	1
145	58.3333	All	p12_171029_171110_171110_a000	171029_171110	P12			0	1	0
146	23.913	All	p12_171029_171110_171110_a000	171029_171110	P12			0	0	1
147	28.3333	All	p12_171029_171110_171110_a000	171029_171110	P12			0	0	1
148	41.8605	All	p12_171029_171110_171110_a000	171029_171110	P12			0	1	0
149	19.469	All	p12_171029_171110_171110_a000	171029_171110	P12			0	0	1
150	33.3333	All	p12_171029_171110_171110_a000	171029_171110	P12			0	0	1
151	35.8974	All	p12_171029_171110_171110_a000	171029_171110	P12			0	0	1
152	33.3333	All	p12_171029_171110_171110_a000	171029_171110	P12			0	0	1
153	20.5128	All	p12_171029_171110_171110_a000	171029_171110	P12			0	0	1
154	42.8571	All	p12_171029_171110_171110_a000	171029_171110	P12			0	1	0
155	38.6667	All	p12_171029_171110_171110_a000	171029_171110	P12			0	0	1
156	42.4658	All	p12_171029_171110_171110_a000	171029_171110	P12			0	1	0
157	36.2416	All	p12_171029_171110_171110_a000	171029_171110	P12			0	0	1
158	30.4878	All	p12_171029_171110_171110_a000	171029_171110	P12			0	0	1
159	36.1446	All	p12_171029_171110_171110_a000	171029_171110	P12			0	0	1
160	33.3333	All	p12_171029_171110_171110_a000	171029_171110	P12			0	0	1
161	62.5	All	p12_171029_171110_171110_a000	171029_171110	P12			1	0	0
162	58.9474	All	p12_171029_171110_171110_a000	171029_171110	P12			0	1	0
163	66.4062	All	p12_171029_171110_171110_a000	171029_171110	P12			1	0	0
164	51.3514	All	p12_171029_171110_171110_a000	171029_171110	P12			0	1	0
165	47	All	p12_171029_171110_171110_a000	171029_171110	P12			0	1	0
166	60.241	All	p12_171029_171110_171110_a000	171029_171110	P12			1	0	0
167	43.8017	All	p12_171029_171110_171110_a000	171029_171110	P12			0	1	0
168	65.7143	All	p12_171029_171110_171110_a000	171029_171110	P12			1	0	0
169	45.5696	All	p12_171029_171110_171110_a000	171029_171110	P12			0	1	0
170	59.4059	All	p12_171029_171110_171110_a000	171029_171110	P12			0	1	0
171	42.8571	All	p12_171029_171110_171110_a000	171029_171110	P12			0	1	0
172	27.4194	All	p12_171029_171110_171110_a000	171029_171110	P12			0	0	1
173	44.7761	All	p12_171029_171110_171110_a000	171029_171110	P12			0	1	0
174	36.9565	All	p12_171029_171110_171110_a000	171029_171110	P12			0	0	1
175	56	All	p12_190828_190909_190909_a000	190828_190909	P12			0	1	0
176	34.2857	All	p12_190828_190909_190909_a000	190828_190909	P12			0	0	1
177	68.2927	All	p12_190828_190909_190909_a000	190828_190909	P12			1	0	0
178	30	All	p12_190828_190909_190909_a000	190828_190909	P12			0	0	1
179	46.7742	All	p12_190828_190909_190909_a000	190828_190909	P12			0	1	0
180	42.8571	All	p12_190828_190909_190909_a000	190828_190909	P12			0	1	0
181	62.2642	All	p12_190828_190909_190909_a000	190828_190909	P12			1	0	0
182	32.8571	All	p12_190828_190909_190909_a000	190828_190909	P12			0	0	1
183	42.1687	All	p12_190828_190909_190909_a000	190828_190909	P12			0	1	0
184	60	All	p12_190828_190909_190909_a000	190828_190909	P12			0	1	0
185	25.3731	All	p12_190828_190909_190909_a000	190828_190909	P12			0	0	1
186	36.2319	All	p12_190828_190909_190909_a000	190828_190909	P12			0	0	1
187	23.0769	All	p12_190828_190909_190909_a000	190828_190909	P12			0	0	1
188	34.5455	All	p12_190828_190909_190909_a000	190828_190909	P12			0	0	1
189	51.1628	All	p12_190828_190909_190909_a000	190828_190909	P12			0	1	0
190	41.6667	All	p12_190828_190909_190909_a000	190828_190909	P12			0	1	0
191	36.2069	All	p12_190828_190909_190909_a000	190828_190909	P12			0	0	1
192	42.6966	All	p12_190828_190909_190909_a000	190828_190909	P12			0	1	0
193	40	All	p12_190828_190909_190909_a000	190828_190909	P12			0	1	0
194	29.5082	All	p12_190828_190909_190909_a000	190828_190909	P12			0	0	1
195	46.5517	All	p12_190828_190909_190909_a000	190828_190909	P12			0	1	0
196	52.1739	All	p12_190828_190909_190909_a000	190828_190909	P12			0	1	0
197	49.1525	All	p12_190828_190909_190909_a000	190828_190909	P12			0	1	0
198	31.3953	All	p12_190828_190909_190909_a000	190828_190909	P12			0	0	1
199	34.8837	All	p12_190828_190909_190909_a000	190828_190909	P12			0	0	1
200	54.1667	All	p12_190828_190909_190909_a000	190828_190909	P12			0	1	0
201	54.1667	All	p12_190828_190909_190909_a000	190828_190909	P12			0	1	0
202	57.1429	All	p12_190828_190909_190909_a000	190828_190909	P12			0	1	0
203	55.5556	All	p12_190828_190909_190909_a000	190828_190909	P12			0	1	0
204	32	All	p12_190828_190909_190909_a000	190828_190909	P12			0	0	1
205	48.8889	All	p12_190828_190909_190909_a000	190828_190909	P12			0	1	0
206	30	All	p12_190828_190909_190909_a000	190828_190909	P12			0	0	1
207	44.898	All	p12_190828_190909_190909_a000	190828_190909	P12			0	1	0
208	43.5484	All	p12_190828_190909_190909_a000	190828_190909	P12			0	1	0
209	34.5455	All	p12_190828_190909_190909_a000	190828_190909	P12			0	0	1
210	35	All	p12_190828_190909_190909_a000	190828_190909	P12			0	0	1
211	33.3333	All	p12_190828_190909_190909_a000	190828_190909	P12			0	0	1
212	35.6322	All	p12_190828_190909_190909_a000	190828_190909	P12			0	0	1
213	32.1429	All	p12_190828_190909_190909_a000	190828_190909	P12			0	0	1
214	26.087	All	p12_190828_190909_190909_a000	190828_190909	P12			0	0	1
215	58.3333	All	p12_190828_190909_190909_a000	190828_190909	P12			0	1	0
216	23.6842	All	p12_190828_190909_190909_a000	190828_190909	P12			0	0	1
217	26.087	All	p12_190828_190909_190909_a000	190828_190909	P12			0	0	1
218	29.8507	All	p12_190828_190909_190909_a000	190828_190909	P12			0	0	1
219	31.3433	All	p12_190828_190909_190909_a000	190828_190909	P12			0	0	1
220	57.7778	All	p12_190828_190909_190909_a000	190828_190909	P12			0	1	0
221	42.3729	All	p12_190828_190909_190909_a000	190828_190909	P12			0	1	0
222	22.2222	All	p12_190828_190909_190909_a000	190828_190909	P12			0	0	1
223	40.8163	All	p12_190828_190909_190909_a000	190828_190909	P12			0	1	0
224	31.1688	All	p12_190828_190909_190909_a000	190828_190909	P12			0	0	1
225	66.6667	All	p12_190828_190909_190909_a000	190828_190909	P12			1	0	0
226	35	All	p12_190828_190909_190909_a000	190828_190909	P12			0	0	1
227	44	All	p12_190828_190909_190909_a000	190828_190909	P12			0	1	0
228	26.087	All	p12_190828_190909_190909_a000	190828_190909	P12			0	0	1
229	31.1475	All	p12_190828_190909_190909_a000	190828_190909	P12			0	0	1
230	32.4675	All	p12_190828_190909_190909_a000	190828_190909	P12			0	0	1
231	45.1613	All	p12_190828_190909_190909_a000	190828_190909	P12			0	1	0
232	45.8333	All	p12_190828_190909_190909_a000	190828_190909	P12			0	1	0
233	48.5714	All	p12_190828_190909_190909_a000	190828_190909	P12			0	1	0
234	39.6226	All	p12_190828_190909_190909_a000	190828_190909	P12			0	0	1
235	40.4762	All	p12_190828_190909_190909_a000	190828_190909	P12			0	1	0
236	28.75	All	p12_190828_190909_190909_a000	190828_190909	P12			0	0	1
237	26.5625	All	p12_190828_190909_190909_a000	190828_190909	P12			0	0	1
238	27.907	All	p12_190828_190909_190909_a000	190828_190909	P12			0	0	1
239	34.8837	All	p12_190828_190909_190909_a000	190828_190909	P12			0	0	1
240	63.4146	All	p12_190828_190909_190909_a000	190828_190909	P12			1	0	0
241	42.1875	All	p12_190828_190909_190909_a000	190828_190909	P12			0	1	0
242	44.4444	All	p12_190828_190909_190909_a000	190828_190909	P12			0	1	0
243	32.1429	All	p12_190828_190909_190909_a000	190828_190909	P12			0	0	1
244	31.8182	All	p12_190828_190909_190909_a000	190828_190909	P12			0	0	1
245	48.9362	All	p12_190828_190909_190909_a000	190828_190909	P12			0	1	0
246	32.6531	All	p12_190828_190909_190909_a000	190828_190909	P12			0	0	1
247	27.7778	All	p12_190828_190909_190909_a000	190828_190909	P12			0	0	1
248	44.7368	All	p12_190828_190909_190909_a000	190828_190909	P12			0	1	0
249	43.4783	All	p12_190828_190909_190909_a000	190828_190909	P12			0	1	0
250	48.4375	All	p12_190828_190909_190909_a000	190828_190909	P12			0	1	0
251	25.3521	All	p12_190828_190909_190909_a000	190828_190909	P12			0	0	1
252	44.186	All	p12_190828_190909_190909_a000	190828_190909	P12			0	1	0
253	49.0566	All	p12_190828_190909_190909_a000	190828_190909	P12			0	1	0
254	65.3846	All	p12_190828_190909_190909_a000	190828_190909	P12			1	0	0
255	62.5	All	p12_190828_190909_190909_a000	190828_190909	P12			1	0	0
256	60.7843	All	p12_190828_190909_190909_a000	190828_190909	P12			1	0	0
257	73.8095	All	p12_190828_190909_190909_a000	190828_190909	P12			1	0	0
258	37.7049	All	p12_190828_190909_190909_a001	190828_190909	P12			0	0	1
259	50	All	p12_190828_190909_190909_a001	190828_190909	P12			0	1	0
260	39	All	p12_190828_190909_190909_a001	190828_190909	P12			0	0	1
261	36.9565	All	p12_190828_190909_190909_a001	190828_190909	P12			0	0	1
262	20.9877	All	p12_190828_190909_190909_a001	190828_190909	P12			0	0	1
263	59.6154	All	p12_190828_190909_190909_a001	190828_190909	P12			0	1	0
264	28.8288	All	p12_190828_190909_190909_a001	190828_190909	P12			0	0	1
265	25.3968	All	p12_190828_190909_190909_a001	190828_190909	P12			0	0	1
266	28.7671	All	p12_190828_190909_190909_a001	190828_190909	P12			0	0	1
267	23.7288	All	p12_190828_190909_190909_a001	190828_190909	P12			0	0	1
268	42.5	All	p12_190828_190909_190909_a001	190828_190909	P12			0	1	0
269	74.4681	All	p12_190828_190909_190909_a001	190828_190909	P12			1	0	0
270	39.6226	All	p12_190828_190909_190909_a001	190828_190909	P12			0	0	1
271	26.3889	All	p12_190828_190909_190909_a001	190828_190909	P12			0	0	1
272	65.1163	All	p12_190828_190909_190909_a001	190828_190909	P12			1	0	0
273	42.623	All	p12_190828_190909_190909_a001	190828_190909	P12			0	1	0
274	50	All	p12_190828_190909_190909_a001	190828_190909	P12			0	1	0
275	38.3721	All	p12_190828_190909_190909_a001	190828_190909	P12			0	0	1
276	40.4255	All	p12_190828_190909_190909_a001	190828_190909	P12			0	1	0
277	69.8113	All	p12_190828_190909_190909_a001	190828_190909	P12			1	0	0
278	68.0556	All	p12_190828_190909_190909_a001	190828_190909	P12			1	0	0
279	30.7692	All	p12_190828_190909_190909_a001	190828_190909	P12			0	0	1
280	62.5	All	p12_190828_190909_190909_a001	190828_190909	P12			1	0	0
281	27.0492	All	p12_190828_190909_190909_a001	190828_190909	P12			0	0	1
282	47.619	All	p12_190828_190909_190909_a001	190828_190909	P12			0	1	0
283	47.3684	All	p12_190828_190909_190909_a001	190828_190909	P12			0	1	0
284	60.9375	All	p12_190828_190909_190909_a001	190828_190909	P12			1	0	0
285	37.3333	All	p12_190828_190909_190909_a001	190828_190909	P12			0	0	1
286	35.4839	All	p12_190828_190909_190909_a001	190828_190909	P12			0	0	1
287	25.9259	All	p12_190828_190909_190909_a001	190828_190909	P12			0	0	1
288	29.4737	All	p12_190828_190909_190909_a001	190828_190909	P12			0	0	1
289	41.4634	All	p12_190828_190909_190909_a001	190828_190909	P12			0	1	0
290	31.5068	All	p12_190828_190909_190909_a001	190828_190909	P12			0	0	1
291	40	All	p12_190828_190909_190909_a001	190828_190909	P12			0	1	0
292	35.8974	All	p12_190828_190909_190909_a001	190828_190909	P12			0	0	1
293	26.5957	All	p12_190828_190909_190909_a001	190828_190909	P12			0	0	1
294	40.8163	All	p12_190828_190909_190909_a001	190828_190909	P12			0	1	0
295	46.8085	All	p12_190828_190909_190909_a001	190828_190909	P12			0	1	0
296	35.7143	All	p12_190828_190909_190909_a001	190828_190909	P12			0	0	1
297	36.3636	All	p12_190828_190909_190909_a001	190828_190909	P12			0	0	1
298	38.2979	All	p12_190828_190909_190909_a001	190828_190909	P12			0	0	1
299	41.3462	All	p12_190828_190909_190909_a001	190828_190909	P12			0	1	0
300	35.7143	All	p12_190828_190909_190909_a001	190828_190909	P12			0	0	1
301	71.6418	All	p12_190828_190909_190909_a001	190828_190909	P12			1	0	0
302	37.7193	All	p12_190828_190909_190909_a001	190828_190909	P12			0	0	1
303	55.7377	All	p12_190828_190909_190909_a001	190828_190909	P12			0	1	0
304	58.0645	All	p12_190828_190909_190909_a001	190828_190909	P12			0	1	0
305	50	All	p12_190828_190909_190909_a001	190828_190909	P12			0	1	0
306	55.9322	All	p12_190828_190909_190909_a001	190828_190909	P12			0	1	0
307	56.4103	All	p12_190828_190909_190909_a001	190828_190909	P12			0	1	0
308	50.7042	All	p12_190828_190909_190909_a001	190828_190909	P12			0	1	0
309	26.5823	All	p12_190828_190909_190909_a001	190828_190909	P12			0	0	1
310	71.1111	All	p12_190828_190909_190909_a001	190828_190909	P12			1	0	0
311	34.375	All	p12_190828_190909_190909_a001	190828_190909	P12			0	0	1
312	40	All	p12_190828_190909_190909_a001	190828_190909	P12			0	1	0
313	60	All	p12_190828_190909_190909_a001	190828_190909	P12			0	1	0
314	48.9362	All	p12_190828_190909_190909_a001	190828_190909	P12			0	1	0
315	42.029	All	p12_190828_190909_190909_a001	190828_190909	P12			0	1	0
316	46.0317	All	p12_190828_190909_190909_a001	190828_190909	P12			0	1	0
317	27.7778	All	p12_190828_190909_190909_a001	190828_190909	P12			0	0	1
318	53.8462	All	p12_190828_190909_190909_a001	190828_190909	P12			0	1	0
319	31.1475	All	p12_190828_190909_190909_a001	190828_190909	P12			0	0	1
320	34.9398	All	p12_190828_190909_190909_a001	190828_190909	P12			0	0	1
321	35.3659	All	p12_190828_190909_190909_a001	190828_190909	P12			0	0	1
322	50	All	p12_190828_190909_190909_a001	190828_190909	P12			0	1	0
323	26.7327	All	p12_190828_190909_190909_a001	190828_190909	P12			0	0	1
324	34.9206	All	p12_190828_190909_190909_a001	190828_190909	P12			0	0	1
325	59.1304	All	p12_190828_190909_190909_a001	190828_190909	P12			0	1	0
326	45.122	All	p12_190911_190923_190923_a001	190911_190923	P12			0	1	0
327	46.875	All	p12_190911_190923_190923_a001	190911_190923	P12			0	1	0
328	42.8571	All	p12_190911_190923_190923_a001	190911_190923	P12			0	1	0
329	59.5745	All	p12_190911_190923_190923_a001	190911_190923	P12			0	1	0
330	53.3333	All	p12_190911_190923_190923_a001	190911_190923	P12			0	1	0
331	52.809	All	p12_190911_190923_190923_a001	190911_190923	P12			0	1	0
332	56.3107	All	p12_190911_190923_190923_a001	190911_190923	P12			0	1	0
333	65.8537	All	p12_190911_190923_190923_a001	190911_190923	P12			1	0	0
334	39.1304	All	p12_190911_190923_190923_a001	190911_190923	P12			0	0	1
335	56.7164	All	p12_190911_190923_190923_a001	190911_190923	P12			0	1	0
336	43	All	p12_190911_190923_190923_a001	190911_190923	P12			0	1	0
337	40.5405	All	p12_190911_190923_190923_a001	190911_190923	P12			0	1	0
338	44.1558	All	p12_190911_190923_190923_a001	190911_190923	P12			0	1	0
339	53.7313	All	p12_190911_190923_190923_a001	190911_190923	P12			0	1	0
340	38.3562	All	p12_190911_190923_190923_a001	190911_190923	P12			0	0	1
341	63.0435	All	p12_190911_190923_190923_a001	190911_190923	P12			1	0	0
342	35.2941	All	p12_190911_190923_190923_a001	190911_190923	P12			0	0	1
343	41.791	All	p12_190911_190923_190923_a001	190911_190923	P12			0	1	0
344	37.9747	All	p12_190911_190923_190923_a001	190911_190923	P12			0	0	1
345	21.9512	All	p12_190911_190923_190923_a001	190911_190923	P12			0	0	1
346	41.3793	All	p12_190911_190923_190923_a001	190911_190923	P12			0	1	0
347	46.5116	All	p12_190911_190923_190923_a001	190911_190923	P12			0	1	0
348	50.9434	All	p12_190911_190923_190923_a001	190911_190923	P12			0	1	0
349	40	All	p12_190911_190923_190923_a001	190911_190923	P12			0	1	0
350	53.125	All	p12_190911_190923_190923_a001	190911_190923	P12			0	1	0
351	39.4737	All	p12_190911_190923_190923_a001	190911_190923	P12			0	0	1
352	29.5775	All	p12_190911_190923_190923_a001	190911_190923	P12			0	0	1
353	44.4444	All	p12_190911_190923_190923_a001	190911_190923	P12			0	1	0
354	51.7647	All	p12_190911_190923_190923_a001	190911_190923	P12			0	1	0
355	48.6111	All	p12_190911_190923_190923_a001	190911_190923	P12			0	1	0
356	38.6667	All	p12_190911_190923_190923_a001	190911_190923	P12			0	0	1
357	43.2836	All	p12_190911_190923_190923_a001	190911_190923	P12			0	1	0
358	52.2388	All	p12_190911_190923_190923_a001	190911_190923	P12			0	1	0
359	51.4286	All	p12_190911_190923_190923_a001	190911_190923	P12			0	1	0
360	49.2308	All	p12_190911_190923_190923_a001	190911_190923	P12			0	1	0
361	34.8485	All	p12_190911_190923_190923_a001	190911_190923	P12			0	0	1
362	28.8889	All	p12_190911_190923_190923_a001	190911_190923	P12			0	0	1
363	40.2299	All	p12_190911_190923_190923_a001	190911_190923	P12			0	1	0
364	34.4828	All	p12_190911_190923_190923_a001	190911_190923	P12			0	0	1
365	50.6667	All	p12_190911_190923_190923_a001	190911_190923	P12			0	1	0
366	35.7143	All	p12_190911_190923_190923_a001	190911_190923	P12			0	0	1
367	30.7692	All	p12_190911_190923_190923_a001	190911_190923	P12			0	0	1
368	51.9481	All	p12_190911_190923_190923_a001	190911_190923	P12			0	1	0
369	34.5455	All	p12_190911_190923_190923_a001	190911_190923	P12			0	0	1
370	42.3729	All	p12_190911_190923_190923_a001	190911_190923	P12			0	1	0
371	44.5783	All	p12_190911_190923_190923_a001	190911_190923	P12			0	1	0
372	81.25	All	p12_190911_190923_190923_a001	190911_190923	P12			1	0	0
373	44.1558	All	p12_190911_190923_190923_a001	190911_190923	P12			0	1	0
374	30.8824	All	p12_190911_190923_190923_a001	190911_190923	P12			0	0	1
375	26.1538	All	p12_190911_190923_190923_a001	190911_190923	P12			0	0	1
376	60.4651	All	p12_190911_190923_190923_a001	190911_190923	P12			1	0	0
377	36.6667	All	p12_190911_190923_190923_a001	190911_190923	P12			0	0	1
378	26.9663	All	p12_190911_190923_190923_a001	190911_190923	P12			0	0	1
379	38.7097	All	p12_190911_190923_190923_a001	190911_190923	P12			0	0	1
380	42.6667	All	p12_190911_190923_190923_a001	190911_190923	P12			0	1	0
381	25.6098	All	p12_190911_190923_190923_a001	190911_190923	P12			0	0	1
382	49.505	All	p12_190911_190923_190923_a001	190911_190923	P12			0	1	0
383	27.2727	All	p12_190911_190923_190923_a001	190911_190923	P12			0	0	1
384	43.2432	All	p12_190911_190923_190923_a001	190911_190923	P12			0	1	0
385	31.3433	All	p12_190911_190923_190923_a001	190911_190923	P12			0	0	1
386	30.8824	All	p12_190911_190923_190923_a001	190911_190923	P12			0	0	1
387	42.3529	All	p12_190911_190923_190923_a001	190911_190923	P12			0	1	0
388	28.3784	All	p12_190911_190923_190923_a001	190911_190923	P12			0	0	1
389	44	All	p12_190911_190923_190923_a001	190911_190923	P12			0	1	0
390	36.9048	All	p12_190911_190923_190923_a001	190911_190923	P12			0	0	1
391	36.3636	All	p12_190911_190923_190923_a001	190911_190923	P12			0	0	1
392	34.2105	All	p12_190911_190923_190923_a001	190911_190923	P12			0	0	1
393	35.5263	All	p12_190911_190923_190923_a001	190911_190923	P12			0	0	1
394	66.6667	All	p12_190911_190923_190923_a001	190911_190923	P12			1	0	0
395	73.2673	All	p12_190911_190923_190923_a001	190911_190923	P12			1	0	0
396	44.4444	All	p12_190911_190923_190923_a001	190911_190923	P12			0	1	0
397	36.1446	All	p12_190911_190923_190923_a001	190911_190923	P12			0	0	1
398	38.9831	All	p12_190911_190923_190923_a001	190911_190923	P12			0	0	1
399	32.2581	All	p12_190911_190923_190923_a001	190911_190923	P12			0	0	1
400	32.9787	All	p12_190911_190923_190923_a001	190911_190923	P12			0	0	1
401	66.1017	All	p12_190911_190923_190923_a001	190911_190923	P12			1	0	0
402	43.2432	All	p12_190911_190923_190923_a001	190911_190923	P12			0	1	0
403	44.5545	All	p12_190911_190923_190923_a001	190911_190923	P12			0	1	0
404	44.086	All	p12_190911_190923_190923_a001	190911_190923	P12			0	1	0
405	48.7805	All	p12_190911_190923_190923_a001	190911_190923	P12			0	1	0
406	49.3671	All	p12_190911_190923_190923_a001	190911_190923	P12			0	1	0
407	34.0659	All	p12_190911_190923_190923_a001	190911_190923	P12			0	0	1
408	58.9744	All	p12_190911_190923_190923_a001	190911_190923	P12			0	1	0
409	30.4348	All	p12_190911_190923_190923_a001	190911_190923	P12			0	0	1
410	40	All	p12_190911_190923_190923_a001	190911_190923	P12			0	1	0
411	34.4086	All	p12_190911_190923_190923_a001	190911_190923	P12			0	0	1
412	41.6667	All	p12_190911_190923_190923_a001	190911_190923	P12			0	1	0
413	46.5116	All	p12_190911_190923_190923_a001	190911_190923	P12			0	1	0
414	29.1667	All	p12_190911_190923_190923_a001	190911_190923	P12			0	0	1
415	62.6506	All	p12_190911_190923_190923_a001	190911_190923	P12			1	0	0
416	31.7073	All	p12_190911_190923_190923_a001	190911_190923	P12			0	0	1
417	39.759	All	p12_190911_190923_190923_a001	190911_190923	P12			0	0	1
418	33.75	All	p12_190911_190923_190923_a001	190911_190923	P12			0	0	1
419	36.3636	All	p12_190911_190923_190923_a001	190911_190923	P12			0	0	1
420	30.5556	All	p12_190911_190923_190923_a001	190911_190923	P12			0	0	1
421	30.5556	All	p12_190911_190923_190923_a001	190911_190923	P12			0	0	1
422	40.9091	All	p12_190911_190923_190923_a001	190911_190923	P12			0	1	0
423	36.3636	All	p12_190921_191003_191003_a001	190921_191003	P12			0	0	1
424	50	All	p12_190921_191003_191003_a001	190921_191003	P12			0	1	0
425	25	All	p12_190921_191003_191003_a001	190921_191003	P12			0	0	1
426	18.75	All	p12_190921_191003_191003_a001	190921_191003	P12			0	0	1
427	28.5714	All	p12_190921_191003_191003_a001	190921_191003	P12			0	0	1
428	51.2821	All	p12_190921_191003_191003_a001	190921_191003	P12			0	1	0
429	41.9355	All	p12_190921_191003_191003_a001	190921_191003	P12			0	1	0
430	34.1463	All	p12_190921_191003_191003_a001	190921_191003	P12			0	0	1
431	37.5	All	p12_190921_191003_191003_a001	190921_191003	P12			0	0	1
432	33.3333	All	p12_190921_191003_191003_a001	190921_191003	P12			0	0	1
433	50	All	p12_190921_191003_191003_a001	190921_191003	P12			0	1	0
434	53.4884	All	p12_190921_191003_191003_a001	190921_191003	P12			0	1	0
435	54.8387	All	p12_190921_191003_191003_a001	190921_191003	P12			0	1	0
436	46.6667	All	p12_190921_191003_191003_a001	190921_191003	P12			0	1	0
437	37.8378	All	p12_190921_191003_191003_a001	190921_191003	P12			0	0	1
438	42.8571	All	p12_190921_191003_191003_a001	190921_191003	P12			0	1	0
439	40.4255	All	p12_190921_191003_191003_a001	190921_191003	P12			0	1	0
440	18.5185	All	p12_190921_191003_191003_a001	190921_191003	P12			0	0	1
441	37.5	All	p12_190921_191003_191003_a001	190921_191003	P12			0	0	1
442	55.2632	All	p12_190921_191003_191003_a001	190921_191003	P12			0	1	0
443	35.1351	All	p12_190921_191003_191003_a001	190921_191003	P12			0	0	1
444	41.4634	All	p12_190921_191003_191003_a001	190921_191003	P12			0	1	0
445	21.6216	All	p12_190921_191003_191003_a001	190921_191003	P12			0	0	1
446	54.8387	All	p12_190921_191003_191003_a001	190921_191003	P12			0	1	0
447	53.8462	All	p12_190921_191003_191003_a001	190921_191003	P12			0	1	0
448	51.8519	All	p12_190921_191003_191003_a001	190921_191003	P12			0	1	0
449	27.907	All	p12_190921_191003_191003_a001	190921_191003	P12			0	0	1
450	45.4545	All	p12_190921_191003_191003_a001	190921_191003	P12			0	1	0
451	38.2353	All	p12_190921_191003_191003_a001	190921_191003	P12			0	0	1
452	34.8837	All	p12_190921_191003_191003_a001	190921_191003	P12			0	0	1
453	46.3415	All	p12_190921_191003_191003_a001	190921_191003	P12			0	1	0
454	33.3333	All	p12_190921_191003_191003_a001	190921_191003	P12			0	0	1
455	46.3415	All	p12_190921_191003_191003_a001	190921_191003	P12			0	1	0
456	45.283	All	p12_190921_191003_191003_a001	190921_191003	P12			0	1	0
457	44.6809	All	p12_190921_191003_191003_a001	190921_191003	P12			0	1	0
458	40.4255	All	p12_190921_191003_191003_a001	190921_191003	P12			0	1	0
459	32.6531	All	p12_190921_191003_191003_a001	190921_191003	P12			0	0	1
460	16.129	All	p12_190921_191003_191003_a001	190921_191003	P12			0	0	1
461	53.8462	All	p12_190921_191003_191003_a001	190921_191003	P12			0	1	0
462	86.9565	All	p12_190921_191003_191003_a001	190921_191003	P12			1	0	0
463	25.7143	All	p12_190921_191003_191003_a001	190921_191003	P12			0	0	1
464	52.6316	All	p12_190921_191003_191003_a001	190921_191003	P12			0	1	0
465	54.902	All	p12_190921_191003_191003_a001	190921_191003	P12			0	1	0
466	50	All	p12_190921_191003_191003_a001	190921_191003	P12			0	1	0
467	31.25	All	p12_190921_191003_191003_a001	190921_191003	P12			0	0	1
468	48.0769	All	p12_190921_191003_191003_a001	190921_191003	P12			0	1	0
469	60	All	p12_190921_191003_191003_a001	190921_191003	P12			0	1	0
470	21.9512	All	p12_190921_191003_191003_a001	190921_191003	P12			0	0	1
471	54.5455	All	p12_190921_191003_191003_a001	190921_191003	P12			0	1	0
472	26.6667	All	p12_190921_191003_191003_a001	190921_191003	P12			0	0	1
473	24.5283	All	p12_190921_191003_191003_a001	190921_191003	P12			0	0	1
474	56.25	All	p12_190921_191003_191003_a001	190921_191003	P12			0	1	0
475	25	All	p12_190921_191003_191003_a001	190921_191003	P12			0	0	1
476	50.9434	All	p12_190921_191003_191003_a001	190921_191003	P12			0	1	0
477	52.6316	All	p12_190921_191003_191003_a001	190921_191003	P12			0	1	0
478	40.5405	All	p12_190921_191003_191003_a001	190921_191003	P12			0	1	0
479	41.0256	All	p12_190921_191003_191003_a001	190921_191003	P12			0	1	0
480	48.4848	All	p12_190921_191003_191003_a001	190921_191003	P12			0	1	0
481	50	All	p12_190921_191003_191003_a001	190921_191003	P12			0	1	0
482	63.4146	All	p12_190921_191003_191003_a001	190921_191003	P12			1	0	0
483	63.2353	All	p12_190921_191003_191003_a001	190921_191003	P12			1	0	0
484	30.3371	All	p12_190921_191003_191003_a001	190921_191003	P12			0	0	1
485	78.8732	All	p12_190921_191003_191003_a001	190921_191003	P12			1	0	0
486	37.5	All	p12_190921_191003_191003_a001	190921_191003	P12			0	0	1
487	50	All	p12_190921_191003_191003_a001	190921_191003	P12			0	1	0
488	35.1064	All	p12_191122_191204_191204_a000	191122_191204	P12			0	0	1
489	33.6634	All	p12_191122_191204_191204_a000	191122_191204	P12			0	0	1
490	43.0556	All	p12_191122_191204_191204_a000	191122_191204	P12			0	1	0
491	32.3944	All	p12_191122_191204_191204_a000	191122_191204	P12			0	0	1
492	24.1071	All	p12_191122_191204_191204_a000	191122_191204	P12			0	0	1
493	39.0244	All	p12_191122_191204_191204_a000	191122_191204	P12			0	0	1
494	22.8261	All	p12_191122_191204_191204_a000	191122_191204	P12			0	0	1
495	23.6111	All	p12_191122_191204_191204_a000	191122_191204	P12			0	0	1
496	32.4561	All	p12_191122_191204_191204_a000	191122_191204	P12			0	0	1
497	31.3953	All	p12_191122_191204_191204_a000	191122_191204	P12			0	0	1
498	23.5294	All	p12_191122_191204_191204_a000	191122_191204	P12			0	0	1
499	45.7447	All	p12_191122_191204_191204_a000	191122_191204	P12			0	1	0
500	40	All	p12_191122_191204_191204_a000	191122_191204	P12			0	1	0
501	33.0579	All	p12_191122_191204_191204_a000	191122_191204	P12			0	0	1
502	63.4921	All	p12_191122_191204_191204_a000	191122_191204	P12			1	0	0
503	34.1772	All	p12_191122_191204_191204_a000	191122_191204	P12			0	0	1
504	31.3953	All	p12_191122_191204_191204_a000	191122_191204	P12			0	0	1
505	36.7347	All	p12_191122_191204_191204_a000	191122_191204	P12			0	0	1
506	40.9836	All	p12_191122_191204_191204_a000	191122_191204	P12			0	1	0
507	32.6087	All	p12_191122_191204_191204_a000	191122_191204	P12			0	0	1
508	45.7143	All	p12_191122_191204_191204_a000	191122_191204	P12			0	1	0
509	59.7222	All	p12_191122_191204_191204_a000	191122_191204	P12			0	1	0
510	37.931	All	p12_191122_191204_191204_a000	191122_191204	P12			0	0	1
511	45	All	p12_191122_191204_191204_a000	191122_191204	P12			0	1	0
512	56.3218	All	p12_191122_191204_191204_a000	191122_191204	P12			0	1	0
513	66.1017	All	p12_191122_191204_191204_a000	191122_191204	P12			1	0	0
514	25	All	p12_191122_191204_191204_a000	191122_191204	P12			0	0	1
515	41.8919	All	p12_191122_191204_191204_a000	191122_191204	P12			0	1	0
516	57.5	All	p12_191122_191204_191204_a000	191122_191204	P12			0	1	0
517	31.4961	All	p12_191122_191204_191204_a000	191122_191204	P12			0	0	1
518	11.828	All	p12_191122_191204_191204_a000	191122_191204	P12			0	0	1
519	21.1111	All	p12_191122_191204_191204_a000	191122_191204	P12			0	0	1
520	43.956	All	p12_191122_191204_191204_a000	191122_191204	P12			0	1	0
521	28.2051	All	p12_191122_191204_191204_a000	191122_191204	P12			0	0	1
522	32.6087	All	p12_191122_191204_191204_a000	191122_191204	P12			0	0	1
523	15.8333	All	p12_191122_191204_191204_a000	191122_191204	P12			0	0	1
524	26.8116	All	p12_191122_191204_191204_a000	191122_191204	P12			0	0	1
525	25.8929	All	p12_191122_191204_191204_a000	191122_191204	P12			0	0	1
526	25.8824	All	p12_191122_191204_191204_a000	191122_191204	P12			0	0	1
527	31.4815	All	p12_191122_191204_191204_a000	191122_191204	P12			0	0	1
528	46	All	p12_191122_191204_191204_a000	191122_191204	P12			0	1	0
529	40.4255	All	p12_191122_191204_191204_a000	191122_191204	P12			0	1	0
530	28	All	p12_191122_191204_191204_a000	191122_191204	P12			0	0	1
531	36.1702	All	p12_191122_191204_191204_a000	191122_191204	P12			0	0	1
532	29.3651	All	p12_191122_191204_191204_a000	191122_191204	P12			0	0	1
533	29.6296	All	p12_191122_191204_191204_a000	191122_191204	P12			0	0	1
534	29.0598	All	p12_191122_191204_191204_a000	191122_191204	P12			0	0	1
535	43.5294	All	p12_191122_191204_191204_a000	191122_191204	P12			0	1	0
536	35.7798	All	p12_191122_191204_191204_a000	191122_191204	P12			0	0	1
537	38.2716	All	p12_191122_191204_191204_a000	191122_191204	P12			0	0	1
538	25	All	p12_191122_191204_191204_a000	191122_191204	P12			0	0	1
539	44	All	p12_191122_191204_191204_a000	191122_191204	P12			0	1	0
540	50.9804	All	p12_191122_191204_191204_a000	191122_191204	P12			0	1	0
541	47.2727	All	p12_191122_191204_191204_a000	191122_191204	P12			0	1	0
542	44.898	All	p12_191122_191204_191204_a001	191122_191204	P12			0	1	0
543	45.7447	All	p12_191122_191204_191204_a001	191122_191204	P12			0	1	0
544	45.5696	All	p12_191122_191204_191204_a001	191122_191204	P12			0	1	0
545	40.4255	All	p12_191122_191204_191204_a001	191122_191204	P12			0	1	0
546	45.679	All	p12_191122_191204_191204_a001	191122_191204	P12			0	1	0
547	44.4444	All	p12_191122_191204_191204_a001	191122_191204	P12			0	1	0
548	49.4505	All	p12_191122_191204_191204_a001	191122_191204	P12			0	1	0
549	21.4286	All	p12_191122_191204_191204_a001	191122_191204	P12			0	0	1
550	42.8571	All	p12_191122_191204_191204_a001	191122_191204	P12			0	1	0
551	39.726	All	p12_191122_191204_191204_a001	191122_191204	P12			0	0	1
552	57.1429	All	p12_191122_191204_191204_a001	191122_191204	P12			0	1	0
553	50	All	p12_191122_191204_191204_a001	191122_191204	P12			0	1	0
554	32.5301	All	p12_191122_191204_191204_a001	191122_191204	P12			0	0	1
555	61.3208	All	p12_191122_191204_191204_a001	191122_191204	P12			1	0	0
556	44.5652	All	p12_191122_191204_191204_a001	191122_191204	P12			0	1	0
557	31.1111	All	p12_191122_191204_191204_a001	191122_191204	P12			0	0	1
558	46.0317	All	p12_191122_191204_191204_a001	191122_191204	P12			0	1	0
559	41.5094	All	p12_191122_191204_191204_a001	191122_191204	P12			0	1	0
560	31.3253	All	p12_191122_191204_191204_a001	191122_191204	P12			0	0	1
561	39.3443	All	p12_191122_191204_191204_a001	191122_191204	P12			0	0	1
562	39.4231	All	p12_191122_191204_191204_a001	191122_191204	P12			0	0	1
563	70.4918	All	p12_191122_191204_191204_a001	191122_191204	P12			1	0	0
564	39.3258	All	p12_191122_191204_191204_a001	191122_191204	P12			0	0	1
565	34.4262	All	p12_191122_191204_191204_a001	191122_191204	P12			0	0	1
566	51.3889	All	p12_191122_191204_191204_a001	191122_191204	P12			0	1	0
567	57.6923	All	p12_191122_191204_191204_a001	191122_191204	P12			0	1	0
568	68	All	p12_191122_191204_191204_a001	191122_191204	P12			1	0	0
569	34.4828	All	p12_191122_191204_191204_a001	191122_191204	P12			0	0	1
570	42.6829	All	p12_191122_191204_191204_a001	191122_191204	P12			0	1	0
571	48.6486	All	p12_191122_191204_191204_a001	191122_191204	P12			0	1	0
572	43.038	All	p12_191122_191204_191204_a001	191122_191204	P12			0	1	0
573	35.6589	All	p12_191122_191204_191204_a001	191122_191204	P12			0	0	1
574	54.1176	All	p12_191122_191204_191204_a001	191122_191204	P12			0	1	0
575	41.0256	All	p12_191122_191204_191204_a001	191122_191204	P12			0	1	0
576	55.4054	All	p12_191122_191204_191204_a001	191122_191204	P12			0	1	0
577	44.3038	All	p12_191122_191204_191204_a001	191122_191204	P12			0	1	0
578	56.3107	All	p12_191122_191204_191204_a001	191122_191204	P12			0	1	0
579	63.4146	All	p12_191122_191204_191204_a001	191122_191204	P12			1	0	0
580	61.2245	All	p12_191122_191204_191204_a001	191122_191204	P12			1	0	0
581	53.9474	All	p12_191122_191204_191204_a001	191122_191204	P12			0	1	0
582	69.1358	All	p12_191122_191204_191204_a001	191122_191204	P12			1	0	0
583	53.9326	All	p12_191122_191204_191204_a001	191122_191204	P12			0	1	0
584	39.7849	All	p12_191122_191204_191204_a001	191122_191204	P12			0	0	1
585	26.7857	All	p12_191122_191204_191204_a001	191122_191204	P12			0	0	1
586	29.3578	All	p12_191122_191204_191204_a001	191122_191204	P12			0	0	1
587	38.843	All	p12_191122_191204_191204_a001	191122_191204	P12			0	0	1
588	50	All	p12_191122_191204_191204_a001	191122_191204	P12			0	1	0
589	43.3333	All	p12_191122_191204_191204_a001	191122_191204	P12			0	1	0
590	28.0992	All	p12_191122_191204_191204_a001	191122_191204	P12			0	0	1
591	32.6087	All	p12_191122_191204_191204_a001	191122_191204	P12			0	0	1
592	27.1739	All	p12_191122_191204_191204_a001	191122_191204	P12			0	0	1
593	36.1111	All	p12_191122_191204_191204_a001	191122_191204	P12			0	0	1
594	44.4444	All	p12_191122_191204_191204_a001	191122_191204	P12			0	1	0
595	57.3913	All	p12_191122_191204_191204_a001	191122_191204	P12			0	1	0
596	36.2745	All	p12_191122_191204_191204_a001	191122_191204	P12			0	0	1
597	43.5484	All	p12_191122_191204_191204_a001	191122_191204	P12			0	1	0
598	56.5217	All	p12_191122_191204_191204_a001	191122_191204	P12			0	1	0
599	42.029	All	p12_191122_191204_191204_a001	191122_191204	P12			0	1	0
600	40.2062	All	p12_191122_191204_191204_a001	191122_191204	P12			0	1	0
601	30.4348	All	p12_191122_191204_191204_a001	191122_191204	P12			0	0	1
602	30.1205	All	p12_191122_191204_191204_a001	191122_191204	P12			0	0	1
603	35.1351	All	p12_191122_191204_191204_a001	191122_191204	P12			0	0	1
604	28.5714	All	p12_191122_191204_191204_a001	191122_191204	P12			0	0	1
605	39	All	p12_191122_191204_191204_a001	191122_191204	P12			0	0	1
606	43.8202	All	p12_191122_191204_191204_a001	191122_191204	P12			0	1	0
607	31.3253	All	p12_191122_191204_191204_a001	191122_191204	P12			0	0	1
608	44.3299	All	p12_191122_191204_191204_a001	191122_191204	P12			0	1	0
609	53.0612	All	p12_191122_191204_191204_a001	191122_191204	P12			0	1	0
610	43.75	All	p12_191122_191204_191204_a001	191122_191204	P12			0	1	0
611	40	All	p12_191122_191204_191204_a001	191122_191204	P12			0	1	0
612	58.9286	All	p12_191122_191204_191204_a001	191122_191204	P12			0	1	0
613	38.6667	All	p12_191122_191204_191204_a001	191122_191204	P12			0	0	1
614	37.5	All	p12_191122_191204_191204_a001	191122_191204	P12			0	0	1
615	32.6087	All	p12_191122_191204_191204_a001	191122_191204	P12			0	0	1
616	45.8333	All	p12_191122_191204_191204_a001	191122_191204	P12			0	1	0
617	42.3913	All	p12_191122_191204_191204_a001	191122_191204	P12			0	1	0
618	23.5294	All	p12_191122_191204_191204_a001	191122_191204	P12			0	0	1
619	45.8333	All	p12_191122_191204_191204_a001	191122_191204	P12			0	1	0
620	32.7103	All	p12_191122_191204_191204_a001	191122_191204	P12			0	0	1
621	61.6667	All	p12_191122_191204_191204_a001	191122_191204	P12			1	0	0
622	32.0388	All	p12_191122_191204_191204_a001	191122_191204	P12			0	0	1
623	58.427	All	p12_191122_191204_191204_a001	191122_191204	P12			0	1	0
624	41.8605	All	p12_191122_191204_191204_a001	191122_191204	P12			0	1	0
625	37.1795	All	p12_191122_191204_191204_a001	191122_191204	P12			0	0	1
626	37.2093	All	p12_191122_191204_191204_a001	191122_191204	P12			0	0	1
627	20.8696	All	p12_191122_191204_191204_a001	191122_191204	P12			0	0	1
628	34.8684	All	p12_191122_191204_191204_a001	191122_191204	P12			0	0	1
629	28.866	All	p12_191122_191204_191204_a001	191122_191204	P12			0	0	1
630	47.2222	All	p12_191122_191204_191204_a001	191122_191204	P12			0	1	0
631	30.6931	All	p12_191122_191204_191204_a001	191122_191204	P12			0	0	1
632	34.1463	All	p12_191122_191204_191204_a001	191122_191204	P12			0	0	1
633	75	All	p5_190320_190325_190325_a000	190320_190325	P5			1	0	0
634	78.5714	All	p5_190320_190325_190325_a000	190320_190325	P5			1	0	0
635	58.75	All	p5_190320_190325_190325_a000	190320_190325	P5			0	1	0
636	81.8182	All	p5_190320_190325_190325_a000	190320_190325	P5			1	0	0
637	90	All	p5_190320_190325_190325_a000	190320_190325	P5			1	0	0
638	76.1905	All	p5_190320_190325_190325_a000	190320_190325	P5			1	0	0
639	75.6757	All	p5_190320_190325_190325_a000	190320_190325	P5			1	0	0
640	87.0968	All	p5_190320_190325_190325_a000	190320_190325	P5			1	0	0
641	92	All	p5_190320_190325_190325_a000	190320_190325	P5			1	0	0
642	83.0769	All	p5_190320_190325_190325_a000	190320_190325	P5			1	0	0
643	91.3043	All	p5_190320_190325_190325_a000	190320_190325	P5			1	0	0
644	90	All	p5_190320_190325_190325_a000	190320_190325	P5			1	0	0
645	72.7273	All	p5_190320_190325_190325_a000	190320_190325	P5			1	0	0
646	75	All	p5_190320_190325_190325_a000	190320_190325	P5			1	0	0
647	54.5455	All	p5_190320_190325_190325_a000	190320_190325	P5			0	1	0
648	87.5	All	p5_190320_190325_190325_a000	190320_190325	P5			1	0	0
649	64	All	p5_190320_190325_190325_a000	190320_190325	P5			1	0	0
650	71.0526	All	p5_190320_190325_190325_a000	190320_190325	P5			1	0	0
651	76.4706	All	p5_190320_190325_190325_a000	190320_190325	P5			1	0	0
652	48.1481	All	p5_190320_190325_190325_a000	190320_190325	P5			0	1	0
653	63.1579	All	p5_190320_190325_190325_a000	190320_190325	P5			1	0	0
654	69.2308	All	p5_190320_190325_190325_a000	190320_190325	P5			1	0	0
655	77.7778	All	p5_190320_190325_190325_a000	190320_190325	P5			1	0	0
656	92.8571	All	p5_190320_190325_190325_a000	190320_190325	P5			1	0	0
657	88	All	p5_190320_190325_190325_a000	190320_190325	P5			1	0	0
658	70.8333	All	p5_190320_190325_190325_a000	190320_190325	P5			1	0	0
659	56.0976	All	p5_190320_190325_190325_a000	190320_190325	P5			0	1	0
660	52	All	p5_190320_190325_190325_a000	190320_190325	P5			0	1	0
661	50.7042	All	p5_190320_190325_190325_a000	190320_190325	P5			0	1	0
662	91.6667	All	p5_190320_190325_190325_a000	190320_190325	P5			1	0	0
663	80.9524	All	p5_190320_190325_190325_a000	190320_190325	P5			1	0	0
664	95.8333	All	p5_190320_190325_190325_a000	190320_190325	P5			1	0	0
665	95	All	p5_190320_190325_190325_a000	190320_190325	P5			1	0	0
666	80.9524	All	p5_190320_190325_190325_a000	190320_190325	P5			1	0	0
667	64.2857	All	p5_190320_190325_190325_a000	190320_190325	P5			1	0	0
668	92.5926	All	p5_190320_190325_190325_a000	190320_190325	P5			1	0	0
669	76.9231	All	p5_190320_190325_190325_a000	190320_190325	P5			1	0	0
670	94.7368	All	p5_190320_190325_190325_a000	190320_190325	P5			1	0	0
671	61.4035	All	p5_190320_190325_190325_a000	190320_190325	P5			1	0	0
672	83.3333	All	p5_190320_190325_190325_a000	190320_190325	P5			1	0	0
673	70	All	p5_190320_190325_190325_a000	190320_190325	P5			1	0	0
674	85.7143	All	p5_190320_190325_190325_a000	190320_190325	P5			1	0	0
675	85.7143	All	p5_190320_190325_190325_a000	190320_190325	P5			1	0	0
676	84.2105	All	p5_190320_190325_190325_a000	190320_190325	P5			1	0	0
677	74.4186	All	p5_190320_190325_190325_a000	190320_190325	P5			1	0	0
678	84	All	p5_190320_190325_190325_a000	190320_190325	P5			1	0	0
679	100	All	p5_190320_190325_190325_a000	190320_190325	P5			1	0	0
680	93.75	All	p5_190320_190325_190325_a000	190320_190325	P5			1	0	0
681	82.6087	All	p5_190320_190325_190325_a000	190320_190325	P5			1	0	0
682	63.6364	All	p5_190320_190325_190325_a000	190320_190325	P5			1	0	0
683	80	All	p5_190320_190325_190325_a000	190320_190325	P5			1	0	0
684	81.25	All	p5_190320_190325_190325_a000	190320_190325	P5			1	0	0
685	73.3333	All	p5_190320_190325_190325_a000	190320_190325	P5			1	0	0
686	76	All	p5_190320_190325_190325_a000	190320_190325	P5			1	0	0
687	96	All	p5_190320_190325_190325_a000	190320_190325	P5			1	0	0
688	86.3636	All	p5_190320_190325_190325_a000	190320_190325	P5			1	0	0
689	71.875	All	p5_190320_190325_190325_a000	190320_190325	P5			1	0	0
690	88	All	p5_190320_190325_190325_a000	190320_190325	P5			1	0	0
691	56.25	All	p5_190320_190325_190325_a000	190320_190325	P5			0	1	0
692	69.6429	All	p5_190320_190325_190325_a000	190320_190325	P5			1	0	0
693	77.2727	All	p5_190320_190325_190325_a000	190320_190325	P5			1	0	0
694	100	All	p5_190320_190325_190325_a000	190320_190325	P5			1	0	0
695	93.3333	All	p5_190320_190325_190325_a000	190320_190325	P5			1	0	0
696	72.4138	All	p5_190320_190325_190325_a000	190320_190325	P5			1	0	0
697	80.9524	All	p5_190320_190325_190325_a000	190320_190325	P5			1	0	0
698	83.3333	All	p5_190320_190325_190325_a000	190320_190325	P5			1	0	0
699	80	All	p5_190320_190325_190325_a000	190320_190325	P5			1	0	0
700	72.2222	All	p5_190320_190325_190325_a000	190320_190325	P5			1	0	0
701	73.3333	All	p5_190320_190325_190325_a000	190320_190325	P5			1	0	0
702	81.25	All	p5_190320_190325_190325_a000	190320_190325	P5			1	0	0
703	90.4762	All	p5_190320_190325_190325_a000	190320_190325	P5			1	0	0
704	88.5714	All	p5_190320_190325_190325_a000	190320_190325	P5			1	0	0
705	56.7568	All	p5_190320_190325_190325_a000	190320_190325	P5			0	1	0
706	51.4286	All	p5_190320_190325_190325_a000	190320_190325	P5			0	1	0
707	70.8333	All	p5_190320_190325_190325_a000	190320_190325	P5			1	0	0
708	67.8571	All	p5_190320_190325_190325_a000	190320_190325	P5			1	0	0
709	86.6667	All	p5_190320_190325_190325_a000	190320_190325	P5			1	0	0
710	93.3333	All	p5_190320_190325_190325_a000	190320_190325	P5			1	0	0
711	68.75	All	p5_190320_190325_190325_a000	190320_190325	P5			1	0	0
712	66.6667	All	p5_190320_190325_190325_a000	190320_190325	P5			1	0	0
713	57.6923	All	p5_190320_190325_190325_a000	190320_190325	P5			0	1	0
714	90.9091	All	p5_190320_190325_190325_a000	190320_190325	P5			1	0	0
715	100	All	p5_190320_190325_190325_a000	190320_190325	P5			1	0	0
716	73.3333	All	p5_190320_190325_190325_a000	190320_190325	P5			1	0	0
717	71.4286	All	p5_190320_190325_190325_a000	190320_190325	P5			1	0	0
718	61.5385	All	p5_190320_190325_190325_a000	190320_190325	P5			1	0	0
719	78.0488	All	p5_190320_190325_190325_a000	190320_190325	P5			1	0	0
720	89.7959	All	p5_190320_190325_190325_a000	190320_190325	P5			1	0	0
721	63.7681	All	p5_190320_190325_190325_a000	190320_190325	P5			1	0	0
722	85.7143	All	p5_190320_190325_190325_a000	190320_190325	P5			1	0	0
723	75	All	p5_190320_190325_190325_a000	190320_190325	P5			1	0	0
724	94.4444	All	p5_190320_190325_190325_a000	190320_190325	P5			1	0	0
725	83.3333	All	p5_190320_190325_190325_a000	190320_190325	P5			1	0	0
726	38.4615	All	p5_190320_190325_190325_a000	190320_190325	P5			0	0	1
727	62.5	All	p5_190320_190325_190325_a000	190320_190325	P5			1	0	0
728	70.2703	All	p5_190320_190325_190325_a000	190320_190325	P5			1	0	0
729	100	All	p5_190320_190325_190325_a000	190320_190325	P5			1	0	0
730	83.3333	All	p5_190320_190325_190325_a000	190320_190325	P5			1	0	0
731	82.1429	All	p5_190320_190325_190325_a000	190320_190325	P5			1	0	0
732	77.5	All	p5_190320_190325_190325_a000	190320_190325	P5			1	0	0
733	87.5	All	p5_190320_190325_190325_a000	190320_190325	P5			1	0	0
734	73.0769	All	p5_190320_190325_190325_a000	190320_190325	P5			1	0	0
735	50	All	p5_190320_190325_190325_a000	190320_190325	P5			0	1	0
736	95	All	p5_190320_190325_190325_a000	190320_190325	P5			1	0	0
737	51.4706	All	p5_190320_190325_190325_a000	190320_190325	P5			0	1	0
738	94.1176	All	p5_190320_190325_190325_a000	190320_190325	P5			1	0	0
739	64.8148	All	p5_190320_190325_190325_a000	190320_190325	P5			1	0	0
740	92.3077	All	p5_190320_190325_190325_a000	190320_190325	P5			1	0	0
741	66.6667	All	p5_190320_190325_190325_a000	190320_190325	P5			1	0	0
742	75.5556	All	p5_190320_190325_190325_a000	190320_190325	P5			1	0	0
743	54.8387	All	p5_190320_190325_190325_a000	190320_190325	P5			0	1	0
744	75.3425	All	p5_190320_190325_190325_a000	190320_190325	P5			1	0	0
745	74.359	All	p5_190320_190325_190325_a000	190320_190325	P5			1	0	0
746	68.5185	All	p5_190320_190325_190325_a000	190320_190325	P5			1	0	0
747	85.7143	All	p5_190320_190325_190325_a000	190320_190325	P5			1	0	0
748	83.3333	All	p5_190320_190325_190325_a001	190320_190325	P5			1	0	0
749	78.5714	All	p5_190320_190325_190325_a001	190320_190325	P5			1	0	0
750	76.3158	All	p5_190320_190325_190325_a001	190320_190325	P5			1	0	0
751	75	All	p5_190320_190325_190325_a001	190320_190325	P5			1	0	0
752	91.6667	All	p5_190320_190325_190325_a001	190320_190325	P5			1	0	0
753	94.7368	All	p5_190320_190325_190325_a001	190320_190325	P5			1	0	0
754	76.9231	All	p5_190320_190325_190325_a001	190320_190325	P5			1	0	0
755	96.7742	All	p5_190320_190325_190325_a001	190320_190325	P5			1	0	0
756	96.6667	All	p5_190320_190325_190325_a001	190320_190325	P5			1	0	0
757	96.1538	All	p5_190320_190325_190325_a001	190320_190325	P5			1	0	0
758	100	All	p5_190320_190325_190325_a001	190320_190325	P5			1	0	0
759	91.6667	All	p5_190320_190325_190325_a001	190320_190325	P5			1	0	0
760	100	All	p5_190320_190325_190325_a001	190320_190325	P5			1	0	0
761	63.0435	All	p5_190320_190325_190325_a001	190320_190325	P5			1	0	0
762	85.7143	All	p5_190320_190325_190325_a001	190320_190325	P5			1	0	0
763	65.8537	All	p5_190320_190325_190325_a001	190320_190325	P5			1	0	0
764	100	All	p5_190320_190325_190325_a001	190320_190325	P5			1	0	0
765	100	All	p5_190320_190325_190325_a001	190320_190325	P5			1	0	0
766	78.5714	All	p5_190320_190325_190325_a001	190320_190325	P5			1	0	0
767	96	All	p5_190320_190325_190325_a001	190320_190325	P5			1	0	0
768	83.7838	All	p5_190320_190325_190325_a001	190320_190325	P5			1	0	0
769	100	All	p5_190320_190325_190325_a001	190320_190325	P5			1	0	0
770	94.5946	All	p5_190320_190325_190325_a001	190320_190325	P5			1	0	0
771	85.1852	All	p5_190320_190325_190325_a001	190320_190325	P5			1	0	0
772	78.5047	All	p5_190320_190325_190325_a001	190320_190325	P5			1	0	0
773	91.3043	All	p5_190320_190325_190325_a001	190320_190325	P5			1	0	0
774	88.3721	All	p5_190320_190325_190325_a001	190320_190325	P5			1	0	0
775	96.5517	All	p5_190320_190325_190325_a001	190320_190325	P5			1	0	0
776	88.8889	All	p5_190320_190325_190325_a001	190320_190325	P5			1	0	0
777	89.1892	All	p5_190320_190325_190325_a001	190320_190325	P5			1	0	0
778	14.2857	All	p5_190320_190325_190325_a001	190320_190325	P5			0	0	1
779	73.0769	All	p5_190320_190325_190325_a001	190320_190325	P5			1	0	0
780	76.7857	All	p5_190320_190325_190325_a001	190320_190325	P5			1	0	0
781	88.4615	All	p5_190320_190325_190325_a001	190320_190325	P5			1	0	0
782	85.7143	All	p5_190320_190325_190325_a001	190320_190325	P5			1	0	0
783	94.4444	All	p5_190320_190325_190325_a001	190320_190325	P5			1	0	0
784	100	All	p5_190320_190325_190325_a001	190320_190325	P5			1	0	0
785	100	All	p5_190320_190325_190325_a001	190320_190325	P5			1	0	0
786	88.8889	All	p5_190320_190325_190325_a001	190320_190325	P5			1	0	0
787	96.2963	All	p5_190320_190325_190325_a001	190320_190325	P5			1	0	0
788	100	All	p5_190320_190325_190325_a001	190320_190325	P5			1	0	0
789	61.1111	All	p5_190320_190325_190325_a001	190320_190325	P5			1	0	0
790	50	All	p5_190320_190325_190325_a001	190320_190325	P5			0	1	0
791	100	All	p5_190320_190325_190325_a001	190320_190325	P5			1	0	0
792	62.5	All	p5_190320_190325_190325_a001	190320_190325	P5			1	0	0
793	87.5	All	p5_190320_190325_190325_a001	190320_190325	P5			1	0	0
794	90	All	p5_190320_190325_190325_a001	190320_190325	P5			1	0	0
795	83.3333	All	p5_190320_190325_190325_a001	190320_190325	P5			1	0	0
796	100	All	p5_190320_190325_190325_a001	190320_190325	P5			1	0	0
797	92.8571	All	p5_190320_190325_190325_a001	190320_190325	P5			1	0	0
798	83.3333	All	p5_190320_190325_190325_a001	190320_190325	P5			1	0	0
799	91.6667	All	p5_190320_190325_190325_a001	190320_190325	P5			1	0	0
800	83.3333	All	p5_190320_190325_190325_a001	190320_190325	P5			1	0	0
801	95.6522	All	p5_190320_190325_190325_a001	190320_190325	P5			1	0	0
802	100	All	p5_190320_190325_190325_a001	190320_190325	P5			1	0	0
803	91.6667	All	p5_190320_190325_190325_a001	190320_190325	P5			1	0	0
804	100	All	p5_190320_190325_190325_a001	190320_190325	P5			1	0	0
805	94.4444	All	p5_190320_190325_190325_a001	190320_190325	P5			1	0	0
806	57.1429	All	p5_190320_190325_190325_a001	190320_190325	P5			0	1	0
807	35.2941	All	p5_190320_190325_190325_a001	190320_190325	P5			0	0	1
808	93.75	All	p5_190320_190325_190325_a001	190320_190325	P5			1	0	0
809	100	All	p5_190320_190325_190325_a001	190320_190325	P5			1	0	0
810	80	All	p5_190320_190325_190325_a001	190320_190325	P5			1	0	0
811	100	All	p5_190320_190325_190325_a001	190320_190325	P5			1	0	0
812	83.3333	All	p5_190320_190325_190325_a001	190320_190325	P5			1	0	0
813	42.3077	All	p5_190320_190325_190325_a001	190320_190325	P5			0	1	0
814	100	All	p5_190320_190325_190325_a001	190320_190325	P5			1	0	0
815	88.8889	All	p5_190320_190325_190325_a001	190320_190325	P5			1	0	0
816	88.2353	All	p5_190320_190325_190325_a001	190320_190325	P5			1	0	0
817	89.1892	All	p5_190320_190325_190325_a001	190320_190325	P5			1	0	0
818	34.6154	All	p5_190320_190325_190325_a001	190320_190325	P5			0	0	1
819	89.4737	All	p5_190320_190325_190325_a001	190320_190325	P5			1	0	0
820	87.5	All	p5_190320_190325_190325_a001	190320_190325	P5			1	0	0
821	81.8182	All	p5_190320_190325_190325_a001	190320_190325	P5			1	0	0
822	100	All	p5_190320_190325_190325_a001	190320_190325	P5			1	0	0
823	100	All	p5_190320_190325_190325_a001	190320_190325	P5			1	0	0
824	94.7368	All	p5_190320_190325_190325_a001	190320_190325	P5			1	0	0
825	98.1132	All	p5_190320_190325_190325_a001	190320_190325	P5			1	0	0
826	83.3333	All	p5_190320_190325_190325_a001	190320_190325	P5			1	0	0
827	100	All	p5_190320_190325_190325_a001	190320_190325	P5			1	0	0
828	86.6667	All	p5_190320_190325_190325_a001	190320_190325	P5			1	0	0
829	79.1667	All	p5_190320_190325_190325_a001	190320_190325	P5			1	0	0
830	100	All	p5_190320_190325_190325_a001	190320_190325	P5			1	0	0
831	100	All	p5_190320_190325_190325_a001	190320_190325	P5			1	0	0
832	88.8889	All	p5_190320_190325_190325_a001	190320_190325	P5			1	0	0
833	57.1429	All	p5_190320_190325_190325_a001	190320_190325	P5			0	1	0
834	100	All	p5_190320_190325_190325_a001	190320_190325	P5			1	0	0
835	83.3333	All	p5_190320_190325_190325_a001	190320_190325	P5			1	0	0
836	100	All	p5_190320_190325_190325_a001	190320_190325	P5			1	0	0
837	66.6667	All	p5_190320_190325_190325_a001	190320_190325	P5			1	0	0
838	91.6667	All	p5_190320_190325_190325_a001	190320_190325	P5			1	0	0
839	100	All	p5_190320_190325_190325_a001	190320_190325	P5			1	0	0
840	66.6667	All	p5_190320_190325_190325_a001	190320_190325	P5			1	0	0
841	55.4795	All	p5_190320_190325_190325_a001	190320_190325	P5			0	1	0
842	84.2105	All	p5_190320_190325_190325_a001	190320_190325	P5			1	0	0
843	88.2353	All	p5_190320_190325_190325_a001	190320_190325	P5			1	0	0
844	83.3333	All	p5_190320_190325_190325_a001	190320_190325	P5			1	0	0
845	58.5366	All	p5_190320_190325_190325_a001	190320_190325	P5			0	1	0
846	100	All	p5_190320_190325_190325_a001	190320_190325	P5			1	0	0
847	69.5652	All	p5_190320_190325_190325_a001	190320_190325	P5			1	0	0
848	96.6667	All	p5_190320_190325_190325_a001	190320_190325	P5			1	0	0
849	85.7143	All	p5_190320_190325_190325_a001	190320_190325	P5			1	0	0
850	64.2857	All	p5_190320_190325_190325_a001	190320_190325	P5			1	0	0
851	79.1667	All	p5_190320_190325_190325_a001	190320_190325	P5			1	0	0
852	90	All	p5_190320_190325_190325_a001	190320_190325	P5			1	0	0
853	95.4545	All	p5_190320_190325_190325_a001	190320_190325	P5			1	0	0
854	94.1176	All	p5_190320_190325_190325_a001	190320_190325	P5			1	0	0
855	95.2381	All	p5_190320_190325_190325_a001	190320_190325	P5			1	0	0
856	92.5926	All	p5_190320_190325_190325_a001	190320_190325	P5			1	0	0
857	80	All	p5_190320_190325_190325_a001	190320_190325	P5			1	0	0
858	100	All	p5_190320_190325_190325_a001	190320_190325	P5			1	0	0
859	73.6842	All	p5_190320_190325_190325_a001	190320_190325	P5			1	0	0
860	0	All	p5_190320_190325_190325_a001	190320_190325	P5			0	0	1
861	57.1429	All	p5_190320_190325_190325_a001	190320_190325	P5			0	1	0
862	88.2353	All	p5_190320_190325_190325_a001	190320_190325	P5			1	0	0
863	94.4444	All	p5_190320_190325_190325_a001	190320_190325	P5			1	0	0
864	89.6552	All	p5_190320_190325_190325_a001	190320_190325	P5			1	0	0
865	50	All	p5_190320_190325_190325_a001	190320_190325	P5			0	1	0
866	90	All	p5_190320_190325_190325_a001	190320_190325	P5			1	0	0
867	94.4444	All	p5_190320_190325_190325_a001	190320_190325	P5			1	0	0
868	100	All	p5_190320_190325_190325_a001	190320_190325	P5			1	0	0
869	83.7838	All	p5_190320_190325_190325_a001	190320_190325	P5			1	0	0
870	100	All	p5_190320_190325_190325_a001	190320_190325	P5			1	0	0
871	71.0526	All	p5_190320_190325_190325_a001	190320_190325	P5			1	0	0
872	86.25	All	p5_191205_191210_0_191210_a000	191205_191210_0	P5			1	0	0
873	57.6271	All	p5_191205_191210_0_191210_a000	191205_191210_0	P5			0	1	0
874	56.8966	All	p5_191205_191210_0_191210_a000	191205_191210_0	P5			0	1	0
875	89.5349	All	p5_191205_191210_0_191210_a000	191205_191210_0	P5			1	0	0
876	82.6087	All	p5_191205_191210_0_191210_a000	191205_191210_0	P5			1	0	0
877	95.3846	All	p5_191205_191210_0_191210_a000	191205_191210_0	P5			1	0	0
878	58.209	All	p5_191205_191210_0_191210_a000	191205_191210_0	P5			0	1	0
879	82.8947	All	p5_191205_191210_0_191210_a000	191205_191210_0	P5			1	0	0
880	63.0631	All	p5_191205_191210_0_191210_a000	191205_191210_0	P5			1	0	0
881	84.2857	All	p5_191205_191210_0_191210_a000	191205_191210_0	P5			1	0	0
882	95.9459	All	p5_191205_191210_0_191210_a000	191205_191210_0	P5			1	0	0
883	84	All	p5_191205_191210_0_191210_a000	191205_191210_0	P5			1	0	0
884	94.1176	All	p5_191205_191210_0_191210_a000	191205_191210_0	P5			1	0	0
885	86.8421	All	p5_191205_191210_0_191210_a000	191205_191210_0	P5			1	0	0
886	56.8966	All	p5_191205_191210_0_191210_a000	191205_191210_0	P5			0	1	0
887	77.7778	All	p5_191205_191210_0_191210_a000	191205_191210_0	P5			1	0	0
888	42.5197	All	p5_191205_191210_0_191210_a000	191205_191210_0	P5			0	1	0
889	92.4528	All	p5_191205_191210_0_191210_a000	191205_191210_0	P5			1	0	0
890	67.5	All	p5_191205_191210_0_191210_a000	191205_191210_0	P5			1	0	0
891	70.5882	All	p5_191205_191210_0_191210_a000	191205_191210_0	P5			1	0	0
892	57.3171	All	p5_191205_191210_0_191210_a000	191205_191210_0	P5			0	1	0
893	73.6842	All	p5_191205_191210_0_191210_a000	191205_191210_0	P5			1	0	0
894	64.7059	All	p5_191205_191210_0_191210_a000	191205_191210_0	P5			1	0	0
895	79.0323	All	p5_191205_191210_0_191210_a000	191205_191210_0	P5			1	0	0
896	80.3571	All	p5_191205_191210_0_191210_a000	191205_191210_0	P5			1	0	0
897	66.0377	All	p5_191205_191210_0_191210_a000	191205_191210_0	P5			1	0	0
898	91.4894	All	p5_191205_191210_0_191210_a000	191205_191210_0	P5			1	0	0
899	87.3786	All	p5_191205_191210_0_191210_a000	191205_191210_0	P5			1	0	0
900	59.1716	All	p5_191205_191210_0_191210_a000	191205_191210_0	P5			0	1	0
901	27.9503	All	p5_191205_191210_0_191210_a000	191205_191210_0	P5			0	0	1
902	92.7273	All	p5_191205_191210_0_191210_a000	191205_191210_0	P5			1	0	0
903	94.3396	All	p5_191205_191210_0_191210_a000	191205_191210_0	P5			1	0	0
904	96.9697	All	p5_191205_191210_0_191210_a000	191205_191210_0	P5			1	0	0
905	87.9518	All	p5_191205_191210_0_191210_a000	191205_191210_0	P5			1	0	0
906	81.8182	All	p5_191205_191210_0_191210_a000	191205_191210_0	P5			1	0	0
907	69.6078	All	p5_191205_191210_0_191210_a000	191205_191210_0	P5			1	0	0
908	91.3793	All	p5_191205_191210_0_191210_a000	191205_191210_0	P5			1	0	0
909	97.6744	All	p5_191205_191210_0_191210_a000	191205_191210_0	P5			1	0	0
910	69.8113	All	p5_191205_191210_0_191210_a000	191205_191210_0	P5			1	0	0
911	57.5758	All	p5_191205_191210_0_191210_a000	191205_191210_0	P5			0	1	0
912	80.5825	All	p5_191205_191210_0_191210_a000	191205_191210_0	P5			1	0	0
913	57.9439	All	p5_191205_191210_0_191210_a000	191205_191210_0	P5			0	1	0
914	41.0714	All	p5_191205_191210_0_191210_a000	191205_191210_0	P5			0	1	0
915	75.4717	All	p5_191205_191210_0_191210_a000	191205_191210_0	P5			1	0	0
916	90.1408	All	p5_191205_191210_0_191210_a000	191205_191210_0	P5			1	0	0
917	83.3333	All	p5_191205_191210_0_191210_a000	191205_191210_0	P5			1	0	0
918	33.3333	All	p5_191205_191210_0_191210_a000	191205_191210_0	P5			0	0	1
919	84.6154	All	p5_191205_191210_0_191210_a000	191205_191210_0	P5			1	0	0
920	47.541	All	p5_191205_191210_0_191210_a000	191205_191210_0	P5			0	1	0
921	40	All	p5_191205_191210_0_191210_a000	191205_191210_0	P5			0	1	0
922	40	All	p5_191205_191210_0_191210_a000	191205_191210_0	P5			0	1	0
923	70.3704	All	p5_191205_191210_0_191210_a000	191205_191210_0	P5			1	0	0
924	55.2632	All	p5_191205_191210_0_191210_a000	191205_191210_0	P5			0	1	0
925	42.8571	All	p5_191205_191210_0_191210_a000	191205_191210_0	P5			0	1	0
926	25	All	p5_191205_191210_0_191210_a000	191205_191210_0	P5			0	0	1
927	48.9362	All	p5_191205_191210_0_191210_a000	191205_191210_0	P5			0	1	0
928	71.831	All	p5_191205_191210_0_191210_a000	191205_191210_0	P5			1	0	0
929	30	All	p5_191205_191210_0_191210_a000	191205_191210_0	P5			0	0	1
930	23.5294	All	p5_191205_191210_0_191210_a000	191205_191210_0	P5			0	0	1
931	54.5455	All	p5_191205_191210_0_191210_a000	191205_191210_0	P5			0	1	0
932	77.7778	All	p5_191205_191210_0_191210_a000	191205_191210_0	P5			1	0	0
933	39.2857	All	p5_191205_191210_0_191210_a000	191205_191210_0	P5			0	0	1
934	81.8182	All	p5_191205_191210_0_191210_a000	191205_191210_0	P5			1	0	0
935	45.9459	All	p5_191205_191210_0_191210_a000	191205_191210_0	P5			0	1	0
936	50	All	p5_191205_191210_0_191210_a000	191205_191210_0	P5			0	1	0
937	74.2268	All	p5_191205_191210_0_191210_a000	191205_191210_0	P5			1	0	0
938	61.194	All	p5_191205_191210_0_191210_a000	191205_191210_0	P5			1	0	0
939	55.4545	All	p5_191205_191210_0_191210_a000	191205_191210_0	P5			0	1	0
940	74.1935	All	p5_191205_191210_0_191210_a000	191205_191210_0	P5			1	0	0
941	92.7711	All	p5_191205_191210_0_191210_a000	191205_191210_0	P5			1	0	0
942	83.0769	All	p5_191205_191210_0_191210_a000	191205_191210_0	P5			1	0	0
943	66.4122	All	p5_191205_191210_0_191210_a000	191205_191210_0	P5			1	0	0
944	85.2459	All	p5_191205_191210_0_191210_a000	191205_191210_0	P5			1	0	0
945	93.1507	All	p5_191205_191210_0_191210_a000	191205_191210_0	P5			1	0	0
946	86.4198	All	p5_191205_191210_0_191210_a000	191205_191210_0	P5			1	0	0
947	83.5443	All	p5_191205_191210_0_191210_a000	191205_191210_0	P5			1	0	0
948	76.0331	All	p5_191205_191210_0_191210_a000	191205_191210_0	P5			1	0	0
949	77.3585	All	p5_191205_191210_0_191210_a000	191205_191210_0	P5			1	0	0
950	92.1569	All	p5_191205_191210_0_191210_a000	191205_191210_0	P5			1	0	0
951	82.8125	All	p5_191205_191210_0_191210_a000	191205_191210_0	P5			1	0	0
952	46.0526	All	p5_191205_191210_0_191210_a000	191205_191210_0	P5			0	1	0
953	61.1111	All	p5_191205_191210_0_191210_a000	191205_191210_0	P5			1	0	0
954	80	All	p5_191205_191210_0_191210_a000	191205_191210_0	P5			1	0	0
955	88.1356	All	p5_191205_191210_0_191210_a000	191205_191210_0	P5			1	0	0
956	77.3585	All	p5_191205_191210_0_191210_a000	191205_191210_0	P5			1	0	0
957	74.1379	All	p5_191205_191210_0_191210_a000	191205_191210_0	P5			1	0	0
958	87.3239	All	p5_191205_191210_0_191210_a000	191205_191210_0	P5			1	0	0
959	91.954	All	p5_191205_191210_0_191210_a000	191205_191210_0	P5			1	0	0
960	34.8837	All	p5_191205_191210_0_191210_a000	191205_191210_0	P5			0	0	1
961	86.6667	All	p5_191205_191210_0_191210_a000	191205_191210_0	P5			1	0	0
962	31.4607	All	p5_191205_191210_0_191210_a000	191205_191210_0	P5			0	0	1
963	87.1795	All	p5_191205_191210_0_191210_a000	191205_191210_0	P5			1	0	0
964	84.7059	All	p5_191205_191210_0_191210_a000	191205_191210_0	P5			1	0	0
965	58.3333	All	p5_191205_191210_0_191210_a000	191205_191210_0	P5			0	1	0
966	78.0952	All	p5_191205_191210_0_191210_a000	191205_191210_0	P5			1	0	0
967	50.7692	All	p5_191205_191210_0_191210_a000	191205_191210_0	P5			0	1	0
968	86.3636	All	p5_191205_191210_0_191210_a000	191205_191210_0	P5			1	0	0
969	81.4815	All	p5_191205_191210_0_191210_a000	191205_191210_0	P5			1	0	0
970	77.2277	All	p5_191205_191210_0_191210_a000	191205_191210_0	P5			1	0	0
971	37.594	All	p5_191205_191210_0_191210_a000	191205_191210_0	P5			0	0	1
972	64.5833	All	p5_191205_191210_0_191210_a000	191205_191210_0	P5			1	0	0
973	82.5688	All	p5_191205_191210_0_191210_a000	191205_191210_0	P5			1	0	0
974	73.913	All	p5_191205_191210_0_191210_a000	191205_191210_0	P5			1	0	0
975	85	All	p5_191205_191210_0_191210_a000	191205_191210_0	P5			1	0	0
976	77.2277	All	p5_191205_191210_0_191210_a000	191205_191210_0	P5			1	0	0
977	82.0513	All	p5_191205_191210_0_191210_a000	191205_191210_0	P5			1	0	0
978	54.8077	All	p5_191205_191210_0_191210_a000	191205_191210_0	P5			0	1	0
979	85.4167	All	p5_191205_191210_0_191210_a000	191205_191210_0	P5			1	0	0
980	94.5946	All	p5_191205_191210_0_191210_a001	191205_191210_0	P5			1	0	0
981	38.6364	All	p5_191205_191210_0_191210_a001	191205_191210_0	P5			0	0	1
982	64.7059	All	p5_191205_191210_0_191210_a001	191205_191210_0	P5			1	0	0
983	92	All	p5_191205_191210_0_191210_a001	191205_191210_0	P5			1	0	0
984	54.5455	All	p5_191205_191210_0_191210_a001	191205_191210_0	P5			0	1	0
985	83.871	All	p5_191205_191210_0_191210_a001	191205_191210_0	P5			1	0	0
986	100	All	p5_191205_191210_0_191210_a001	191205_191210_0	P5			1	0	0
987	84.8485	All	p5_191205_191210_0_191210_a001	191205_191210_0	P5			1	0	0
988	38.7755	All	p5_191205_191210_0_191210_a001	191205_191210_0	P5			0	0	1
989	84.6154	All	p5_191205_191210_0_191210_a001	191205_191210_0	P5			1	0	0
990	85.3659	All	p5_191205_191210_0_191210_a001	191205_191210_0	P5			1	0	0
991	90.3226	All	p5_191205_191210_0_191210_a001	191205_191210_0	P5			1	0	0
992	82.8571	All	p5_191205_191210_0_191210_a001	191205_191210_0	P5			1	0	0
993	79.4118	All	p5_191205_191210_0_191210_a001	191205_191210_0	P5			1	0	0
994	75.8621	All	p5_191205_191210_0_191210_a001	191205_191210_0	P5			1	0	0
995	100	All	p5_191205_191210_0_191210_a001	191205_191210_0	P5			1	0	0
996	60.8696	All	p5_191205_191210_0_191210_a001	191205_191210_0	P5			1	0	0
997	96.5517	All	p5_191205_191210_0_191210_a001	191205_191210_0	P5			1	0	0
998	81.8182	All	p5_191205_191210_0_191210_a001	191205_191210_0	P5			1	0	0
999	72	All	p5_191205_191210_0_191210_a001	191205_191210_0	P5			1	0	0
1000	87.7551	All	p5_191205_191210_0_191210_a001	191205_191210_0	P5			1	0	0
1001	83.3333	All	p5_191205_191210_0_191210_a001	191205_191210_0	P5			1	0	0
1002	71.4286	All	p5_191205_191210_0_191210_a001	191205_191210_0	P5			1	0	0
1003	91.1765	All	p5_191205_191210_0_191210_a001	191205_191210_0	P5			1	0	0
1004	64.4444	All	p5_191205_191210_0_191210_a001	191205_191210_0	P5			1	0	0
1005	97.7273	All	p5_191205_191210_0_191210_a001	191205_191210_0	P5			1	0	0
1006	89.2857	All	p5_191205_191210_0_191210_a001	191205_191210_0	P5			1	0	0
1007	89.7436	All	p5_191205_191210_0_191210_a001	191205_191210_0	P5			1	0	0
1008	84.2105	All	p5_191205_191210_0_191210_a001	191205_191210_0	P5			1	0	0
1009	69.2308	All	p5_191205_191210_0_191210_a001	191205_191210_0	P5			1	0	0
1010	79.4118	All	p5_191205_191210_0_191210_a001	191205_191210_0	P5			1	0	0
1011	97.2222	All	p5_191205_191210_0_191210_a001	191205_191210_0	P5			1	0	0
1012	86	All	p5_191205_191210_0_191210_a001	191205_191210_0	P5			1	0	0
1013	75	All	p5_191205_191210_0_191210_a001	191205_191210_0	P5			1	0	0
1014	94.4444	All	p5_191205_191210_0_191210_a001	191205_191210_0	P5			1	0	0
1015	76.6667	All	p5_191205_191210_0_191210_a001	191205_191210_0	P5			1	0	0
1016	86.4865	All	p5_191205_191210_0_191210_a001	191205_191210_0	P5			1	0	0
1017	84.375	All	p5_191205_191210_0_191210_a001	191205_191210_0	P5			1	0	0
1018	80	All	p5_191205_191210_0_191210_a001	191205_191210_0	P5			1	0	0
1019	81.8182	All	p5_191205_191210_0_191210_a001	191205_191210_0	P5			1	0	0
1020	76.1905	All	p5_191205_191210_0_191210_a001	191205_191210_0	P5			1	0	0
1021	85.7143	All	p5_191205_191210_0_191210_a001	191205_191210_0	P5			1	0	0
1022	70.9677	All	p5_191205_191210_0_191210_a001	191205_191210_0	P5			1	0	0
1023	66.6667	All	p5_191205_191210_0_191210_a001	191205_191210_0	P5			1	0	0
1024	67.7419	All	p5_191205_191210_0_191210_a001	191205_191210_0	P5			1	0	0
1025	78.7234	All	p5_191205_191210_0_191210_a001	191205_191210_0	P5			1	0	0
1026	100	All	p5_191205_191210_0_191210_a001	191205_191210_0	P5			1	0	0
1027	100	All	p5_191205_191210_0_191210_a001	191205_191210_0	P5			1	0	0
1028	84.0909	All	p5_191205_191210_0_191210_a001	191205_191210_0	P5			1	0	0
1029	79.4872	All	p5_191205_191210_0_191210_a001	191205_191210_0	P5			1	0	0
1030	82.6087	All	p5_191205_191210_0_191210_a001	191205_191210_0	P5			1	0	0
1031	52.2727	All	p5_191205_191210_0_191210_a001	191205_191210_0	P5			0	1	0
1032	78.9474	All	p5_191205_191210_0_191210_a001	191205_191210_0	P5			1	0	0
1033	60	All	p5_191205_191210_0_191210_a001	191205_191210_0	P5			0	1	0
1034	82.6923	All	p5_191205_191210_0_191210_a001	191205_191210_0	P5			1	0	0
1035	85.7143	All	p5_191205_191210_0_191210_a001	191205_191210_0	P5			1	0	0
1036	87.1795	All	p5_191205_191210_0_191210_a001	191205_191210_0	P5			1	0	0
1037	81.8182	All	p5_191205_191210_0_191210_a001	191205_191210_0	P5			1	0	0
1038	53.8462	All	p5_191205_191210_0_191210_a001	191205_191210_0	P5			0	1	0
1039	66.6667	All	p5_191205_191210_0_191210_a001	191205_191210_0	P5			1	0	0
1040	72.2222	All	p5_191205_191210_0_191210_a001	191205_191210_0	P5			1	0	0
1041	87.8049	All	p5_191205_191210_0_191210_a001	191205_191210_0	P5			1	0	0
1042	66.6667	All	p5_191205_191210_0_191210_a001	191205_191210_0	P5			1	0	0
1043	93.3333	All	p5_191205_191210_0_191210_a001	191205_191210_0	P5			1	0	0
1044	69.5652	All	p5_191205_191210_0_191210_a001	191205_191210_0	P5			1	0	0
1045	68.5185	All	p5_191205_191210_0_191210_a001	191205_191210_0	P5			1	0	0
1046	78.5714	All	p5_191205_191210_0_191210_a001	191205_191210_0	P5			1	0	0
1047	72.4138	All	p5_191205_191210_0_191210_a001	191205_191210_0	P5			1	0	0
1048	56.8627	All	p5_191205_191210_0_191210_a001	191205_191210_0	P5			0	1	0
1049	60.5263	All	p5_191205_191210_0_191210_a001	191205_191210_0	P5			1	0	0
1050	92.3077	All	p5_191205_191210_0_191210_a001	191205_191210_0	P5			1	0	0
1051	67.6471	All	p5_191205_191210_0_191210_a001	191205_191210_0	P5			1	0	0
1052	74.4186	All	p5_191205_191210_0_191210_a001	191205_191210_0	P5			1	0	0
1053	66.6667	All	p5_191205_191210_0_191210_a001	191205_191210_0	P5			1	0	0
1054	45.614	All	p5_191205_191210_0_191210_a001	191205_191210_0	P5			0	1	0
1055	65.3061	All	p5_191205_191210_0_191210_a001	191205_191210_0	P5			1	0	0
1056	46.2963	All	p5_191205_191210_0_191210_a001	191205_191210_0	P5			0	1	0
1057	48.0769	All	p5_191205_191210_0_191210_a001	191205_191210_0	P5			0	1	0
1058	74.4681	All	p5_191205_191210_0_191210_a001	191205_191210_0	P5			1	0	0
1059	80	All	p5_191205_191210_0_191210_a001	191205_191210_0	P5			1	0	0
1060	61.7021	All	p5_191205_191210_0_191210_a001	191205_191210_0	P5			1	0	0
1061	92.5	All	p5_191205_191210_0_191210_a001	191205_191210_0	P5			1	0	0
1062	86.1111	All	p5_191205_191210_0_191210_a001	191205_191210_0	P5			1	0	0
1063	80.9524	All	p5_191205_191210_0_191210_a001	191205_191210_0	P5			1	0	0
1064	86.6667	All	p5_191205_191210_0_191210_a001	191205_191210_0	P5			1	0	0
1065	64.4444	All	p5_191205_191210_0_191210_a001	191205_191210_0	P5			1	0	0
1066	70.8333	All	p5_191205_191210_0_191210_a001	191205_191210_0	P5			1	0	0
1067	83.3333	All	p5_191205_191210_0_191210_a001	191205_191210_0	P5			1	0	0
1068	65.7143	All	p5_191205_191210_0_191210_a001	191205_191210_0	P5			1	0	0
1069	82.2222	All	p5_191205_191210_0_191210_a001	191205_191210_0	P5			1	0	0
1070	81.4815	All	p5_191205_191210_0_191210_a001	191205_191210_0	P5			1	0	0
1071	58.9744	All	p5_191205_191210_0_191210_a001	191205_191210_0	P5			0	1	0
1072	50	All	p5_191205_191210_0_191210_a001	191205_191210_0	P5			0	1	0
1073	71.1538	All	p5_191205_191210_0_191210_a001	191205_191210_0	P5			1	0	0
1074	60.8696	All	p5_191205_191210_0_191210_a001	191205_191210_0	P5			1	0	0
1075	34.7826	All	p5_191205_191210_0_191210_a001	191205_191210_0	P5			0	0	1
1076	82.5	All	p5_191205_191210_0_191210_a001	191205_191210_0	P5			1	0	0
1077	57.6923	All	p5_191205_191210_0_191210_a001	191205_191210_0	P5			0	1	0
1078	78.125	All	p5_191205_191210_0_191210_a001	191205_191210_0	P5			1	0	0
1079	62.963	All	p5_191205_191210_0_191210_a001	191205_191210_0	P5			1	0	0
1080	88.6364	All	p5_191205_191210_0_191210_a001	191205_191210_0	P5			1	0	0
1081	77.2727	All	p5_191205_191210_0_191210_a001	191205_191210_0	P5			1	0	0
1082	65.3846	All	p5_191205_191210_0_191210_a001	191205_191210_0	P5			1	0	0
1083	88	All	p5_191205_191210_0_191210_a001	191205_191210_0	P5			1	0	0
1084	80.8511	All	p5_191205_191210_0_191210_a001	191205_191210_0	P5			1	0	0
1085	81.25	All	p5_191205_191210_0_191210_a001	191205_191210_0	P5			1	0	0
1086	74.4681	All	p5_191205_191210_0_191210_a001	191205_191210_0	P5			1	0	0
1087	80	All	p5_191205_191210_0_191210_a001	191205_191210_0	P5			1	0	0
1088	70.2128	All	p5_191205_191210_0_191210_a001	191205_191210_0	P5			1	0	0
1089	66.6667	All	p5_191205_191210_0_191210_a001	191205_191210_0	P5			1	0	0
1090	50	All	p5_191205_191210_0_191210_a001	191205_191210_0	P5			0	1	0
1091	23.5294	All	p5_191205_191210_0_191210_a001	191205_191210_0	P5			0	0	1
1092	40	All	p5_191205_191210_0_191210_a001	191205_191210_0	P5			0	1	0
1093	36.3636	All	p5_191205_191210_0_191210_a001	191205_191210_0	P5			0	0	1
1094	41.9355	All	p5_191205_191210_0_191210_a001	191205_191210_0	P5			0	1	0
1095	90	All	p5_191205_191210_0_191210_a001	191205_191210_0	P5			1	0	0
1096	33.3333	All	p5_191205_191210_0_191210_a001	191205_191210_0	P5			0	0	1
1097	38.0952	All	p5_191205_191210_0_191210_a001	191205_191210_0	P5			0	0	1
1098	41.3793	All	p5_191205_191210_0_191210_a001	191205_191210_0	P5			0	1	0
1099	92.3077	All	p5_191205_191210_0_191210_a001	191205_191210_0	P5			1	0	0
1100	18.75	All	p5_191205_191210_0_191210_a001	191205_191210_0	P5			0	0	1
1101	42.8571	All	p5_191205_191210_0_191210_a001	191205_191210_0	P5			0	1	0
1102	60.8696	All	p5_191205_191210_0_191210_a001	191205_191210_0	P5			1	0	0
1103	32	All	p5_191205_191210_0_191210_a001	191205_191210_0	P5			0	0	1
1104	30	All	p5_191205_191210_0_191210_a001	191205_191210_0	P5			0	0	1
1105	11.1111	All	p5_191205_191210_0_191210_a001	191205_191210_0	P5			0	0	1
1106	27.2727	All	p5_191205_191210_0_191210_a001	191205_191210_0	P5			0	0	1
1107	25	All	p5_191205_191210_0_191210_a001	191205_191210_0	P5			0	0	1
1108	47.3684	All	p5_191205_191210_0_191210_a001	191205_191210_0	P5			0	1	0
1109	28.5714	All	p5_191205_191210_0_191210_a001	191205_191210_0	P5			0	0	1
1110	7.14286	All	p5_191205_191210_0_191210_a001	191205_191210_0	P5			0	0	1
1111	41.6667	All	p5_191205_191210_0_191210_a001	191205_191210_0	P5			0	1	0
1112	77.4194	All	p5_191205_191210_0_191210_a001	191205_191210_0	P5			1	0	0
1113	33.3333	All	p5_191205_191210_0_191210_a001	191205_191210_0	P5			0	0	1
1114	40	All	p5_191205_191210_0_191210_a001	191205_191210_0	P5			0	1	0
1115	20	All	p5_191205_191210_0_191210_a001	191205_191210_0	P5			0	0	1
1116	17.6471	All	p5_191205_191210_0_191210_a001	191205_191210_0	P5			0	0	1
1117	100	All	p5_191205_191210_0_191210_a001	191205_191210_0	P5			1	0	0
1118	25.9259	All	p5_191205_191210_0_191210_a001	191205_191210_0	P5			0	0	1
1119	29.2683	All	p5_191205_191210_0_191210_a001	191205_191210_0	P5			0	0	1
1120	77.2727	All	p5_191205_191210_0_191210_a001	191205_191210_0	P5			1	0	0
1121	80	All	p5_191205_191210_0_191210_a001	191205_191210_0	P5			1	0	0
1122	5.55556	All	p5_191205_191210_0_191210_a001	191205_191210_0	P5			0	0	1
1123	94.7368	All	p5_191205_191210_0_191210_a001	191205_191210_0	P5			1	0	0
1124	70	All	p5_191205_191210_0_191210_a001	191205_191210_0	P5			1	0	0
1125	0	All	p5_191205_191210_0_191210_a001	191205_191210_0	P5			0	0	1
1126	34.7826	All	p5_191205_191210_0_191210_a001	191205_191210_0	P5			0	0	1
1127	78.5714	All	p5_191205_191210_0_191210_a001	191205_191210_0	P5			1	0	0
1128	45.4545	All	p5_191205_191210_0_191210_a001	191205_191210_0	P5			0	1	0
1129	36	All	p5_191205_191210_0_191210_a001	191205_191210_0	P5			0	0	1
1130	48.5714	All	p5_191205_191210_0_191210_a001	191205_191210_0	P5			0	1	0
1131	40	All	p5_191205_191210_0_191210_a001	191205_191210_0	P5			0	1	0
1132	40	All	p5_191205_191210_0_191210_a001	191205_191210_0	P5			0	1	0
1133	30.7692	All	p5_191205_191210_0_191210_a001	191205_191210_0	P5			0	0	1
1134	95.4545	All	p5_191205_191210_0_191210_a001	191205_191210_0	P5			1	0	0
1135	75.8621	All	p5_191205_191210_0_191210_a001	191205_191210_0	P5			1	0	0
1136	37.5	All	p5_191205_191210_0_191210_a001	191205_191210_0	P5			0	0	1
1137	85.7143	All	p5_191205_191210_0_191210_a001	191205_191210_0	P5			1	0	0
1138	84.8485	All	p5_191205_191210_0_191210_a001	191205_191210_0	P5			1	0	0
1139	25.641	All	p5_191205_191210_0_191210_a001	191205_191210_0	P5			0	0	1
1140	72.973	All	p5_191205_191210_0_191210_a001	191205_191210_0	P5			1	0	0
1141	62.2222	All	p5_191205_191210_0_191210_a001	191205_191210_0	P5			1	0	0
1142	65.625	All	p5_191205_191210_0_191210_a001	191205_191210_0	P5			1	0	0
1143	77.7778	All	p5_191205_191210_0_191210_a001	191205_191210_0	P5			1	0	0
1144	85.7143	All	p5_191205_191210_0_191210_a001	191205_191210_0	P5			1	0	0
1145	100	All	p5_191205_191210_0_191210_a001	191205_191210_0	P5			1	0	0
1146	85.7143	All	p5_191205_191210_0_191210_a001	191205_191210_0	P5			1	0	0
1147	58.3333	All	p5_191205_191210_0_191210_a001	191205_191210_0	P5			0	1	0
1148	70.2703	All	p5_191205_191210_0_191210_a001	191205_191210_0	P5			1	0	0
1149	95	All	p5_191205_191210_0_191210_a001	191205_191210_0	P5			1	0	0
1150	88	All	p5_191205_191210_0_191210_a001	191205_191210_0	P5			1	0	0
1151	82.6087	All	p5_191205_191210_0_191210_a001	191205_191210_0	P5			1	0	0
1152	100	All	p5_191205_191210_0_191210_a001	191205_191210_0	P5			1	0	0
1153	33.3333	All	p5_191205_191210_0_191210_a001	191205_191210_0	P5			0	0	1
1154	72	All	p5_191205_191210_0_191210_a001	191205_191210_0	P5			1	0	0
1155	93.1034	All	p5_191205_191210_0_191210_a001	191205_191210_0	P5			1	0	0
1156	58.3333	All	p5_191205_191210_0_191210_a001	191205_191210_0	P5			0	1	0
1157	58.8235	All	p5_191205_191210_0_191210_a001	191205_191210_0	P5			0	1	0
1158	77.4194	All	p5_191205_191210_0_191210_a001	191205_191210_0	P5			1	0	0
1159	78.0488	All	p5_191205_191210_0_191210_a001	191205_191210_0	P5			1	0	0
1160	69.2308	All	p5_191205_191210_0_191210_a001	191205_191210_0	P5			1	0	0
1161	85	All	p5_191205_191210_0_191210_a001	191205_191210_0	P5			1	0	0
1162	65	All	p5_191205_191210_0_191210_a001	191205_191210_0	P5			1	0	0
1163	85.3659	All	p5_191205_191210_0_191210_a001	191205_191210_0	P5			1	0	0
1164	35.8491	All	p5_191205_191210_0_191210_a001	191205_191210_0	P5			0	0	1
1165	88.2353	All	p5_191205_191210_0_191210_a001	191205_191210_0	P5			1	0	0
1166	92.6829	All	p5_191205_191210_0_191210_a001	191205_191210_0	P5			1	0	0
1167	46.5116	All	p5_191205_191210_0_191210_a001	191205_191210_0	P5			0	1	0
1168	86.4865	All	p5_191205_191210_0_191210_a001	191205_191210_0	P5			1	0	0
1169	95.8333	All	p5_191205_191210_0_191210_a001	191205_191210_0	P5			1	0	0
1170	88.4615	All	p5_191205_191210_0_191210_a001	191205_191210_0	P5			1	0	0
1171	74.5098	All	p5_191205_191210_0_191210_a001	191205_191210_0	P5			1	0	0
1172	60.8696	All	p5_191205_191210_0_191210_a001	191205_191210_0	P5			1	0	0
1173	75	All	p5_191205_191210_0_191210_a001	191205_191210_0	P5			1	0	0
1174	51.8519	All	p5_191205_191210_0_191210_a001	191205_191210_0	P5			0	1	0
1175	87.5	All	p5_191205_191210_0_191210_a001	191205_191210_0	P5			1	0	0
1176	71.0526	All	p5_191205_191210_0_191210_a001	191205_191210_0	P5			1	0	0
1177	60	All	p5_191205_191210_0_191210_a001	191205_191210_0	P5			0	1	0
1178	75.8621	All	p5_191205_191210_0_191210_a001	191205_191210_0	P5			1	0	0
1179	90.3226	All	p5_191205_191210_0_191210_a001	191205_191210_0	P5			1	0	0
1180	70	All	p5_191205_191210_0_191210_a001	191205_191210_0	P5			1	0	0
1181	78.9474	All	p5_191205_191210_0_191210_a001	191205_191210_0	P5			1	0	0
1182	81.4815	All	p5_191205_191210_0_191210_a001	191205_191210_0	P5			1	0	0
1183	23.8095	All	p5_191205_191210_0_191210_a001	191205_191210_0	P5			0	0	1
1184	62.2222	All	p5_191205_191210_0_191210_a001	191205_191210_0	P5			1	0	0
1185	40.4255	All	p5_191205_191210_0_191210_a001	191205_191210_0	P5			0	1	0
1186	34.1463	All	p5_191205_191210_0_191210_a001	191205_191210_0	P5			0	0	1
1187	62.5	All	p5_191205_191210_0_191210_a001	191205_191210_0	P5			1	0	0
1188	89.2857	All	p5_191205_191210_0_191210_a001	191205_191210_0	P5			1	0	0
1189	70	All	p5_191205_191210_0_191210_a001	191205_191210_0	P5			1	0	0
1190	48.3871	All	p5_191205_191210_0_191210_a001	191205_191210_0	P5			0	1	0
1191	76.6667	All	p5_191205_191210_0_191210_a001	191205_191210_0	P5			1	0	0
1192	55.7692	All	p5_191205_191210_0_191210_a001	191205_191210_0	P5			0	1	0
1193	72	All	p5_191205_191210_0_191210_a001	191205_191210_0	P5			1	0	0
1194	42.5532	All	p5_191205_191210_0_191210_a001	191205_191210_0	P5			0	1	0
1195	45.8333	All	p5_191205_191210_0_191210_a001	191205_191210_0	P5			0	1	0
1196	76.9231	All	p5_191205_191210_0_191210_a001	191205_191210_0	P5			1	0	0
1197	62.2222	All	p5_191205_191210_0_191210_a001	191205_191210_0	P5			1	0	0
1198	28.5714	All	p5_191205_191210_0_191210_a001	191205_191210_0	P5			0	0	1
1199	100	All	p5_191205_191210_0_191210_a001	191205_191210_0	P5			1	0	0
1200	36.3636	All	p5_191205_191210_0_191210_a001	191205_191210_0	P5			0	0	1
1201	26.8293	All	p5_191205_191210_0_191210_a001	191205_191210_0	P5			0	0	1
1202	38.2979	All	p5_191205_191210_0_191210_a001	191205_191210_0	P5			0	0	1
1203	59.0909	All	p5_191205_191210_0_191210_a001	191205_191210_0	P5			0	1	0
1204	42.1053	All	p5_191205_191210_0_191210_a001	191205_191210_0	P5			0	1	0
1205	64.2857	All	p5_191205_191210_0_191210_a001	191205_191210_0	P5			1	0	0
1206	25	All	p5_191205_191210_0_191210_a001	191205_191210_0	P5			0	0	1
1207	36.3636	All	p5_191205_191210_0_191210_a001	191205_191210_0	P5			0	0	1
1208	89.2857	All	p5_191205_191210_0_191210_a001	191205_191210_0	P5			1	0	0
1209	70	All	p5_191205_191210_0_191210_a001	191205_191210_0	P5			1	0	0
1210	33.3333	All	p5_191205_191210_0_191210_a001	191205_191210_0	P5			0	0	1
1211	100	All	p5_191205_191210_0_191210_a001	191205_191210_0	P5			1	0	0
1212	87.5	All	p5_191205_191210_0_191210_a001	191205_191210_0	P5			1	0	0
1213	53.3333	All	p5_191205_191210_0_191210_a001	191205_191210_0	P5			0	1	0
1214	76.6667	All	p5_191205_191210_0_191210_a001	191205_191210_0	P5			1	0	0
1215	54	All	p5_191205_191210_0_191210_a001	191205_191210_0	P5			0	1	0
1216	33.3333	All	p5_191205_191210_0_191210_a001	191205_191210_0	P5			0	0	1
1217	32	All	p5_191205_191210_0_191210_a001	191205_191210_0	P5			0	0	1
1218	19.0476	All	p5_191205_191210_0_191210_a001	191205_191210_0	P5			0	0	1
1219	34.4828	All	p5_191205_191210_0_191210_a001	191205_191210_0	P5			0	0	1
1220	88.8889	All	p5_191205_191210_0_191210_a001	191205_191210_0	P5			1	0	0
1221	7.14286	All	p5_191205_191210_0_191210_a001	191205_191210_0	P5			0	0	1
1222	69.2308	All	p5_191205_191210_0_191210_a001	191205_191210_0	P5			1	0	0
1223	42.8571	All	p5_191205_191210_0_191210_a001	191205_191210_0	P5			0	1	0
1224	36.3636	All	p5_191205_191210_0_191210_a001	191205_191210_0	P5			0	0	1
1225	34.1463	All	p5_191205_191210_0_191210_a001	191205_191210_0	P5			0	0	1
1226	62.5	All	p5_191205_191210_0_191210_a001	191205_191210_0	P5			1	0	0
1227	70	All	p5_191205_191210_0_191210_a001	191205_191210_0	P5			1	0	0
1228	90.625	All	p5_191205_191210_0_191210_a001	191205_191210_0	P5			1	0	0
1229	38.2979	All	p5_191205_191210_0_191210_a001	191205_191210_0	P5			0	0	1
1230	46.1538	All	p5_191205_191210_0_191210_a001	191205_191210_0	P5			0	1	0
1231	52	All	p5_191205_191210_0_191210_a001	191205_191210_0	P5			0	1	0
1232	40	All	p5_191205_191210_0_191210_a001	191205_191210_0	P5			0	1	0
1233	75	All	p5_191205_191210_0_191210_a001	191205_191210_0	P5			1	0	0
1234	63.1579	All	p5_191205_191210_0_191210_a001	191205_191210_0	P5			1	0	0
1235	52	All	p5_191205_191210_0_191210_a001	191205_191210_0	P5			0	1	0
1236	62.2222	All	p5_191205_191210_0_191210_a001	191205_191210_0	P5			1	0	0
1237	50	All	p5_191205_191210_0_191210_a001	191205_191210_0	P5			0	1	0
1238	40	All	p5_191205_191210_0_191210_a001	191205_191210_0	P5			0	1	0
1239	30.7692	All	p5_191205_191210_0_191210_a001	191205_191210_0	P5			0	0	1
1240	66.6667	All	p5_191205_191210_0_191210_a001	191205_191210_0	P5			1	0	0
1241	93.1034	All	p5_191205_191210_0_191210_a001	191205_191210_0	P5			1	0	0
1242	70	All	p5_191205_191210_0_191210_a001	191205_191210_0	P5			1	0	0
1243	76.6667	All	p5_191205_191210_0_191210_a001	191205_191210_0	P5			1	0	0
1244	85.7143	All	p5_191205_191210_0_191210_a001	191205_191210_0	P5			1	0	0
1245	38.6364	All	p5_191205_191210_0_191210_a001	191205_191210_0	P5			0	0	1
1246	77.4194	All	p5_191205_191210_1_191210_a000	191205_191210_1	P5			1	0	0
1247	100	All	p5_191205_191210_1_191210_a000	191205_191210_1	P5			1	0	0
1248	62.7907	All	p5_191205_191210_1_191210_a000	191205_191210_1	P5			1	0	0
1249	65	All	p5_191205_191210_1_191210_a000	191205_191210_1	P5			1	0	0
1250	30.2083	All	p5_191205_191210_1_191210_a000	191205_191210_1	P5			0	0	1
1251	80.303	All	p5_191205_191210_1_191210_a000	191205_191210_1	P5			1	0	0
1252	86.9565	All	p5_191205_191210_1_191210_a000	191205_191210_1	P5			1	0	0
1253	23.8095	All	p5_191205_191210_1_191210_a000	191205_191210_1	P5			0	0	1
1254	39.3701	All	p5_191205_191210_1_191210_a000	191205_191210_1	P5			0	0	1
1255	78.2609	All	p5_191205_191210_1_191210_a000	191205_191210_1	P5			1	0	0
1256	52.6316	All	p5_191205_191210_1_191210_a000	191205_191210_1	P5			0	1	0
1257	85.7143	All	p5_191205_191210_1_191210_a000	191205_191210_1	P5			1	0	0
1258	88.8	All	p5_191205_191210_1_191210_a000	191205_191210_1	P5			1	0	0
1259	89.8148	All	p5_191205_191210_1_191210_a000	191205_191210_1	P5			1	0	0
1260	42.735	All	p5_191205_191210_1_191210_a000	191205_191210_1	P5			0	1	0
1261	10.4167	All	p5_191205_191210_1_191210_a000	191205_191210_1	P5			0	0	1
1262	84.6154	All	p5_191205_191210_1_191210_a000	191205_191210_1	P5			1	0	0
1263	46.9136	All	p5_191205_191210_1_191210_a000	191205_191210_1	P5			0	1	0
1264	56	All	p5_191205_191210_1_191210_a000	191205_191210_1	P5			0	1	0
1265	73.8462	All	p5_191205_191210_1_191210_a000	191205_191210_1	P5			1	0	0
1266	45.6897	All	p5_191205_191210_1_191210_a000	191205_191210_1	P5			0	1	0
1267	83.0769	All	p5_191205_191210_1_191210_a000	191205_191210_1	P5			1	0	0
1268	79.2453	All	p5_191205_191210_1_191210_a000	191205_191210_1	P5			1	0	0
1269	70.1754	All	p5_191205_191210_1_191210_a000	191205_191210_1	P5			1	0	0
1270	84.3373	All	p5_191205_191210_1_191210_a000	191205_191210_1	P5			1	0	0
1271	62.9213	All	p5_191205_191210_1_191210_a000	191205_191210_1	P5			1	0	0
1272	44.4444	All	p5_191205_191210_1_191210_a000	191205_191210_1	P5			0	1	0
1273	78.3133	All	p5_191205_191210_1_191210_a000	191205_191210_1	P5			1	0	0
1274	75	All	p5_191205_191210_1_191210_a000	191205_191210_1	P5			1	0	0
1275	90.9836	All	p5_191205_191210_1_191210_a000	191205_191210_1	P5			1	0	0
1276	63.6364	All	p5_191205_191210_1_191210_a000	191205_191210_1	P5			1	0	0
1277	79.7297	All	p5_191205_191210_1_191210_a000	191205_191210_1	P5			1	0	0
1278	82.9787	All	p5_191205_191210_1_191210_a000	191205_191210_1	P5			1	0	0
1279	97.3214	All	p5_191205_191210_1_191210_a000	191205_191210_1	P5			1	0	0
1280	24.5283	All	p5_191205_191210_1_191210_a000	191205_191210_1	P5			0	0	1
1281	61.3208	All	p5_191205_191210_1_191210_a000	191205_191210_1	P5			1	0	0
1282	44.7761	All	p5_191205_191210_1_191210_a000	191205_191210_1	P5			0	1	0
1283	87.6543	All	p5_191205_191210_1_191210_a000	191205_191210_1	P5			1	0	0
1284	40.5797	All	p5_191205_191210_1_191210_a000	191205_191210_1	P5			0	1	0
1285	76.2295	All	p5_191205_191210_1_191210_a000	191205_191210_1	P5			1	0	0
1286	51.0791	All	p5_191205_191210_1_191210_a000	191205_191210_1	P5			0	1	0
1287	52.5424	All	p5_191205_191210_1_191210_a000	191205_191210_1	P5			0	1	0
1288	81.25	All	p5_191205_191210_1_191210_a000	191205_191210_1	P5			1	0	0
1289	85.5072	All	p5_191205_191210_1_191210_a000	191205_191210_1	P5			1	0	0
1290	81.0127	All	p5_191205_191210_1_191210_a000	191205_191210_1	P5			1	0	0
1291	50.2674	All	p5_191205_191210_1_191210_a000	191205_191210_1	P5			0	1	0
1292	88.1579	All	p5_191205_191210_1_191210_a000	191205_191210_1	P5			1	0	0
1293	86.1111	All	p5_191205_191210_1_191210_a000	191205_191210_1	P5			1	0	0
1294	24.0385	All	p5_191205_191210_1_191210_a000	191205_191210_1	P5			0	0	1
1295	76.0274	All	p5_191205_191210_1_191210_a000	191205_191210_1	P5			1	0	0
1296	42.8571	All	p5_191205_191210_1_191210_a000	191205_191210_1	P5			0	1	0
1297	90	All	p5_191205_191210_1_191210_a000	191205_191210_1	P5			1	0	0
1298	84.9057	All	p5_191205_191210_1_191210_a000	191205_191210_1	P5			1	0	0
1299	88.0597	All	p5_191205_191210_1_191210_a000	191205_191210_1	P5			1	0	0
1300	65.0407	All	p5_191205_191210_1_191210_a000	191205_191210_1	P5			1	0	0
1301	84.2466	All	p5_191205_191210_1_191210_a000	191205_191210_1	P5			1	0	0
1302	73.1959	All	p5_191205_191210_1_191210_a000	191205_191210_1	P5			1	0	0
1303	51.2605	All	p5_191205_191210_1_191210_a000	191205_191210_1	P5			0	1	0
1304	93.1507	All	p5_191205_191210_1_191210_a000	191205_191210_1	P5			1	0	0
1305	13.1148	All	p5_191205_191210_1_191210_a000	191205_191210_1	P5			0	0	1
1306	60.8247	All	p5_191205_191210_1_191210_a000	191205_191210_1	P5			1	0	0
1307	46.281	All	p5_191205_191210_1_191210_a000	191205_191210_1	P5			0	1	0
1308	50.4854	All	p5_191205_191210_1_191210_a000	191205_191210_1	P5			0	1	0
1309	51.9608	All	p5_191205_191210_1_191210_a000	191205_191210_1	P5			0	1	0
1310	91.6667	All	p5_191205_191210_1_191210_a000	191205_191210_1	P5			1	0	0
1311	58.2734	All	p5_191205_191210_1_191210_a000	191205_191210_1	P5			0	1	0
1312	50.9434	All	p5_191205_191210_1_191210_a000	191205_191210_1	P5			0	1	0
1313	79.0123	All	p5_191205_191210_1_191210_a000	191205_191210_1	P5			1	0	0
1314	42.9577	All	p5_191205_191210_1_191210_a000	191205_191210_1	P5			0	1	0
1315	35	All	p5_191205_191210_1_191210_a000	191205_191210_1	P5			0	0	1
1316	87.5	All	p5_191205_191210_1_191210_a000	191205_191210_1	P5			1	0	0
1317	76.1905	All	p5_191205_191210_1_191210_a000	191205_191210_1	P5			1	0	0
1318	44.2623	All	p5_191205_191210_1_191210_a000	191205_191210_1	P5			0	1	0
1319	57.1429	All	p5_191205_191210_1_191210_a000	191205_191210_1	P5			0	1	0
1320	28.7234	All	p5_191205_191210_1_191210_a000	191205_191210_1	P5			0	0	1
1321	91.2621	All	p5_191205_191210_1_191210_a000	191205_191210_1	P5			1	0	0
1322	63.4921	All	p5_191205_191210_1_191210_a000	191205_191210_1	P5			1	0	0
1323	53.5211	All	p5_191205_191210_1_191210_a000	191205_191210_1	P5			0	1	0
1324	81.5217	All	p5_191205_191210_1_191210_a000	191205_191210_1	P5			1	0	0
1325	82.6087	All	p5_191205_191210_1_191210_a000	191205_191210_1	P5			1	0	0
1326	70	All	p5_191205_191210_1_191210_a000	191205_191210_1	P5			1	0	0
1327	77.8947	All	p5_191205_191210_1_191210_a000	191205_191210_1	P5			1	0	0
1328	83.871	All	p5_191205_191210_1_191210_a000	191205_191210_1	P5			1	0	0
1329	71.4286	All	p5_191205_191210_1_191210_a000	191205_191210_1	P5			1	0	0
1330	58.6777	All	p5_191205_191210_1_191210_a000	191205_191210_1	P5			0	1	0
1331	53.9062	All	p5_191205_191210_1_191210_a000	191205_191210_1	P5			0	1	0
1332	77.5	All	p5_191205_191210_1_191210_a000	191205_191210_1	P5			1	0	0
1333	40.5941	All	p5_191205_191210_1_191210_a000	191205_191210_1	P5			0	1	0
1334	44	All	p5_191205_191210_1_191210_a000	191205_191210_1	P5			0	1	0
1335	58.7302	All	p5_191205_191210_1_191210_a000	191205_191210_1	P5			0	1	0
1336	45.3704	All	p5_191205_191210_1_191210_a000	191205_191210_1	P5			0	1	0
1337	46.8085	All	p5_191205_191210_1_191210_a000	191205_191210_1	P5			0	1	0
1338	71.4286	All	p5_191205_191210_1_191210_a000	191205_191210_1	P5			1	0	0
1339	80.1282	All	p5_191205_191210_1_191210_a000	191205_191210_1	P5			1	0	0
1340	53.4884	All	p5_191205_191210_1_191210_a000	191205_191210_1	P5			0	1	0
1341	74.1007	All	p5_191205_191210_1_191210_a000	191205_191210_1	P5			1	0	0
1342	40.9396	All	p5_191205_191210_1_191210_a000	191205_191210_1	P5			0	1	0
1343	69.5122	All	p5_191205_191210_1_191210_a000	191205_191210_1	P5			1	0	0
1344	48.5149	All	p5_191205_191210_1_191210_a000	191205_191210_1	P5			0	1	0
1345	81.5789	All	p5_191205_191210_1_191210_a000	191205_191210_1	P5			1	0	0
1346	79	All	p5_191205_191210_1_191210_a000	191205_191210_1	P5			1	0	0
1347	83.5821	All	p5_191205_191210_1_191210_a000	191205_191210_1	P5			1	0	0
1348	85	All	p5_191205_191210_1_191210_a000	191205_191210_1	P5			1	0	0
1349	60.9023	All	p5_191205_191210_1_191210_a000	191205_191210_1	P5			1	0	0
1350	91.8919	All	p5_191205_191210_1_191210_a000	191205_191210_1	P5			1	0	0
1351	62.1951	All	p5_191205_191210_1_191210_a000	191205_191210_1	P5			1	0	0
1352	83.8384	All	p5_191205_191210_1_191210_a000	191205_191210_1	P5			1	0	0
1353	91.5789	All	p5_191205_191210_1_191210_a000	191205_191210_1	P5			1	0	0
1354	92.1875	All	p5_191205_191210_1_191210_a000	191205_191210_1	P5			1	0	0
1355	51.0067	All	p5_191205_191210_1_191210_a000	191205_191210_1	P5			0	1	0
1356	88.5246	All	p5_191205_191210_1_191210_a000	191205_191210_1	P5			1	0	0
1357	80.3922	All	p5_191205_191210_1_191210_a000	191205_191210_1	P5			1	0	0
1358	76.9231	All	p5_191205_191210_1_191210_a000	191205_191210_1	P5			1	0	0
1359	72.093	All	p5_191205_191210_1_191210_a000	191205_191210_1	P5			1	0	0
1360	92.7835	All	p5_191205_191210_1_191210_a000	191205_191210_1	P5			1	0	0
1361	55.8824	All	p5_191205_191210_1_191210_a001	191205_191210_1	P5			0	1	0
1362	68.1818	All	p5_191205_191210_1_191210_a001	191205_191210_1	P5			1	0	0
1363	48.1481	All	p5_191205_191210_1_191210_a001	191205_191210_1	P5			0	1	0
1364	52.6316	All	p5_191205_191210_1_191210_a001	191205_191210_1	P5			0	1	0
1365	50	All	p5_191205_191210_1_191210_a001	191205_191210_1	P5			0	1	0
1366	91.3043	All	p5_191205_191210_1_191210_a001	191205_191210_1	P5			1	0	0
1367	90.9091	All	p5_191205_191210_1_191210_a001	191205_191210_1	P5			1	0	0
1368	56.25	All	p5_191205_191210_1_191210_a001	191205_191210_1	P5			0	1	0
1369	71.4286	All	p5_191205_191210_1_191210_a001	191205_191210_1	P5			1	0	0
1370	46.1538	All	p5_191205_191210_1_191210_a001	191205_191210_1	P5			0	1	0
1371	70	All	p5_191205_191210_1_191210_a001	191205_191210_1	P5			1	0	0
1372	81.8182	All	p5_191205_191210_1_191210_a001	191205_191210_1	P5			1	0	0
1373	73.0769	All	p5_191205_191210_1_191210_a001	191205_191210_1	P5			1	0	0
1374	59.0909	All	p5_191205_191210_1_191210_a001	191205_191210_1	P5			0	1	0
1375	95	All	p5_191205_191210_1_191210_a001	191205_191210_1	P5			1	0	0
1376	87.0968	All	p5_191205_191210_1_191210_a001	191205_191210_1	P5			1	0	0
1377	92	All	p5_191205_191210_1_191210_a001	191205_191210_1	P5			1	0	0
1378	53.3333	All	p5_191205_191210_1_191210_a001	191205_191210_1	P5			0	1	0
1379	75	All	p5_191205_191210_1_191210_a001	191205_191210_1	P5			1	0	0
1380	61.9048	All	p5_191205_191210_1_191210_a001	191205_191210_1	P5			1	0	0
1381	85.7143	All	p5_191205_191210_1_191210_a001	191205_191210_1	P5			1	0	0
1382	78.5714	All	p5_191205_191210_1_191210_a001	191205_191210_1	P5			1	0	0
1383	100	All	p5_191205_191210_1_191210_a001	191205_191210_1	P5			1	0	0
1384	35	All	p5_191205_191210_1_191210_a001	191205_191210_1	P5			0	0	1
1385	83.3333	All	p5_191205_191210_1_191210_a001	191205_191210_1	P5			1	0	0
1386	87.5	All	p5_191205_191210_1_191210_a001	191205_191210_1	P5			1	0	0
1387	92.3077	All	p5_191205_191210_1_191210_a001	191205_191210_1	P5			1	0	0
1388	50	All	p5_191205_191210_1_191210_a001	191205_191210_1	P5			0	1	0
1389	50	All	p5_191205_191210_1_191210_a001	191205_191210_1	P5			0	1	0
1390	47.3684	All	p5_191205_191210_1_191210_a001	191205_191210_1	P5			0	1	0
1391	100	All	p5_191205_191210_1_191210_a001	191205_191210_1	P5			1	0	0
1392	88.8889	All	p5_191205_191210_1_191210_a001	191205_191210_1	P5			1	0	0
1393	58.8235	All	p5_191205_191210_1_191210_a001	191205_191210_1	P5			0	1	0
1394	76.4706	All	p5_191205_191210_1_191210_a001	191205_191210_1	P5			1	0	0
1395	50	All	p5_191205_191210_1_191210_a001	191205_191210_1	P5			0	1	0
1396	100	All	p5_191205_191210_1_191210_a001	191205_191210_1	P5			1	0	0
1397	50	All	p5_191205_191210_1_191210_a001	191205_191210_1	P5			0	1	0
1398	48.9362	All	p5_191205_191210_1_191210_a001	191205_191210_1	P5			0	1	0
1399	88.2353	All	p5_191205_191210_1_191210_a001	191205_191210_1	P5			1	0	0
1400	83.3333	All	p5_191205_191210_1_191210_a001	191205_191210_1	P5			1	0	0
1401	81.8182	All	p5_191205_191210_1_191210_a001	191205_191210_1	P5			1	0	0
1402	70	All	p5_191205_191210_1_191210_a001	191205_191210_1	P5			1	0	0
1403	88.8889	All	p5_191205_191210_1_191210_a001	191205_191210_1	P5			1	0	0
1404	100	All	p5_191205_191210_1_191210_a001	191205_191210_1	P5			1	0	0
1405	62.5	All	p5_191205_191210_1_191210_a001	191205_191210_1	P5			1	0	0
1406	71.4286	All	p5_191205_191210_1_191210_a001	191205_191210_1	P5			1	0	0
1407	94.7368	All	p5_191205_191210_1_191210_a001	191205_191210_1	P5			1	0	0
1408	60	All	p5_191205_191210_1_191210_a001	191205_191210_1	P5			0	1	0
1409	76.9231	All	p5_191205_191210_1_191210_a001	191205_191210_1	P5			1	0	0
1410	58.0645	All	p5_191205_191210_1_191210_a001	191205_191210_1	P5			0	1	0
1411	64.7059	All	p5_191205_191210_1_191210_a001	191205_191210_1	P5			1	0	0
1412	54.5455	All	p5_191205_191210_1_191210_a001	191205_191210_1	P5			0	1	0
1413	100	All	p5_191205_191210_1_191210_a001	191205_191210_1	P5			1	0	0
1414	52	All	p5_191205_191210_1_191210_a001	191205_191210_1	P5			0	1	0
1415	50	All	p5_191205_191210_1_191210_a001	191205_191210_1	P5			0	1	0
1416	36.1111	All	p5_191205_191210_1_191210_a001	191205_191210_1	P5			0	0	1
1417	78.5714	All	p5_191205_191210_1_191210_a001	191205_191210_1	P5			1	0	0
1418	64.2857	All	p5_191205_191210_1_191210_a001	191205_191210_1	P5			1	0	0
1419	23.0769	All	p5_191205_191210_1_191210_a001	191205_191210_1	P5			0	0	1
1420	76.4706	All	p5_191205_191210_1_191210_a001	191205_191210_1	P5			1	0	0
1421	84.2105	All	p5_191205_191210_1_191210_a001	191205_191210_1	P5			1	0	0
1422	42.8571	All	p5_191205_191210_1_191210_a001	191205_191210_1	P5			0	1	0
1423	100	All	p5_191205_191210_1_191210_a001	191205_191210_1	P5			1	0	0
1424	58.0645	All	p5_191205_191210_1_191210_a001	191205_191210_1	P5			0	1	0
1425	92.8571	All	p5_191205_191210_1_191210_a001	191205_191210_1	P5			1	0	0
1426	62.7907	All	p5_191205_191210_1_191210_a001	191205_191210_1	P5			1	0	0
1427	100	All	p5_191205_191210_1_191210_a001	191205_191210_1	P5			1	0	0
1428	100	All	p5_191205_191210_1_191210_a001	191205_191210_1	P5			1	0	0
1429	40.625	All	p5_191205_191210_1_191210_a001	191205_191210_1	P5			0	1	0
1430	78.7879	All	p5_191205_191210_1_191210_a001	191205_191210_1	P5			1	0	0
1431	80.9524	All	p5_191205_191210_1_191210_a001	191205_191210_1	P5			1	0	0
1432	76.1905	All	p5_191205_191210_1_191210_a001	191205_191210_1	P5			1	0	0
1433	86.6667	All	p5_191205_191210_1_191210_a001	191205_191210_1	P5			1	0	0
1434	40	All	p5_191205_191210_1_191210_a001	191205_191210_1	P5			0	1	0
1435	55.1724	All	p5_191205_191210_1_191210_a001	191205_191210_1	P5			0	1	0
1436	78.9474	All	p5_191205_191210_1_191210_a001	191205_191210_1	P5			1	0	0
1437	74.2857	All	p5_191205_191210_1_191210_a001	191205_191210_1	P5			1	0	0
1438	52.7778	All	p5_191205_191210_1_191210_a001	191205_191210_1	P5			0	1	0
1439	66.6667	All	p5_191205_191210_1_191210_a001	191205_191210_1	P5			1	0	0
1440	100	All	p5_191205_191210_1_191210_a001	191205_191210_1	P5			1	0	0
1441	90	All	p5_191205_191210_1_191210_a001	191205_191210_1	P5			1	0	0
1442	66.6667	All	p5_191205_191210_1_191210_a001	191205_191210_1	P5			1	0	0
1443	48.1481	All	p5_191205_191210_1_191210_a001	191205_191210_1	P5			0	1	0
1444	34.7826	All	p5_191205_191210_1_191210_a001	191205_191210_1	P5			0	0	1
1445	90	All	p5_191205_191210_1_191210_a001	191205_191210_1	P5			1	0	0
1446	60	All	p5_191205_191210_1_191210_a001	191205_191210_1	P5			0	1	0
1447	63.1579	All	p5_191205_191210_1_191210_a001	191205_191210_1	P5			1	0	0
1448	35	All	p5_191205_191210_1_191210_a001	191205_191210_1	P5			0	0	1
1449	46.1538	All	p5_191205_191210_1_191210_a001	191205_191210_1	P5			0	1	0
1450	92.3077	All	p5_191205_191210_1_191210_a001	191205_191210_1	P5			1	0	0
1451	72.7273	All	p5_191205_191210_1_191210_a001	191205_191210_1	P5			1	0	0
1452	67.7419	All	p5_191205_191210_1_191210_a001	191205_191210_1	P5			1	0	0
1453	68.75	All	p5_191205_191210_1_191210_a001	191205_191210_1	P5			1	0	0
1454	92.3077	All	p5_191205_191210_1_191210_a001	191205_191210_1	P5			1	0	0
1455	19.0476	All	p5_191205_191210_1_191210_a001	191205_191210_1	P5			0	0	1
1456	72.2222	All	p5_191205_191210_1_191210_a001	191205_191210_1	P5			1	0	0
1457	28	All	p5_191205_191210_1_191210_a001	191205_191210_1	P5			0	0	1
1458	61.9048	All	p5_191205_191210_1_191210_a001	191205_191210_1	P5			1	0	0
1459	57.8947	All	p5_191205_191210_1_191210_a001	191205_191210_1	P5			0	1	0
1460	92.8571	All	p5_191205_191210_1_191210_a001	191205_191210_1	P5			1	0	0
1461	78.125	All	p5_191205_191210_1_191210_a001	191205_191210_1	P5			1	0	0
1462	83.3333	All	p5_191205_191210_1_191210_a001	191205_191210_1	P5			1	0	0
1463	33.3333	All	p5_191205_191210_1_191210_a001	191205_191210_1	P5			0	0	1
1464	82.3529	All	p5_191205_191210_1_191210_a001	191205_191210_1	P5			1	0	0
1465	95	All	p5_191205_191210_1_191210_a001	191205_191210_1	P5			1	0	0
1466	85.7143	All	p5_191205_191210_1_191210_a001	191205_191210_1	P5			1	0	0
1467	56.25	All	p5_191205_191210_1_191210_a001	191205_191210_1	P5			0	1	0
1468	75	All	p5_191205_191210_1_191210_a001	191205_191210_1	P5			1	0	0
1469	86.6667	All	p5_191205_191210_1_191210_a001	191205_191210_1	P5			1	0	0
1470	45.4545	All	p5_191205_191210_1_191210_a001	191205_191210_1	P5			0	1	0
1471	90.4762	All	p5_191205_191210_1_191210_a001	191205_191210_1	P5			1	0	0
1472	78.9474	All	p5_191205_191210_1_191210_a001	191205_191210_1	P5			1	0	0
1473	38.0952	All	p5_191205_191210_1_191210_a001	191205_191210_1	P5			0	0	1
1474	50	All	p5_191205_191210_1_191210_a001	191205_191210_1	P5			0	1	0
1475	57.1429	All	p5_191205_191210_1_191210_a001	191205_191210_1	P5			0	1	0
1476	82.6087	All	p5_191205_191210_1_191210_a001	191205_191210_1	P5			1	0	0
1477	78.5714	All	p5_191205_191210_1_191210_a001	191205_191210_1	P5			1	0	0
1478	65.2174	All	p5_191205_191210_1_191210_a001	191205_191210_1	P5			1	0	0
1479	53.1915	All	p5_191205_191210_1_191210_a001	191205_191210_1	P5			0	1	0
1480	85	All	p5_191205_191210_1_191210_a001	191205_191210_1	P5			1	0	0
1481	42.8571	All	p5_191205_191210_1_191210_a001	191205_191210_1	P5			0	1	0
1482	84.2105	All	p5_191205_191210_1_191210_a001	191205_191210_1	P5			1	0	0
1483	66.6667	All	p5_191205_191210_1_191210_a001	191205_191210_1	P5			1	0	0
1484	82.6087	All	p5_191205_191210_1_191210_a001	191205_191210_1	P5			1	0	0
1485	75.8621	All	p5_191205_191210_1_191210_a001	191205_191210_1	P5			1	0	0
1486	83.3333	All	p5_191205_191210_1_191210_a001	191205_191210_1	P5			1	0	0
1487	87.5	All	p5_191205_191210_1_191210_a001	191205_191210_1	P5			1	0	0
1488	53.125	All	p5_191205_191210_1_191210_a001	191205_191210_1	P5			0	1	0
1489	42.8571	All	p5_191205_191210_1_191210_a001	191205_191210_1	P5			0	1	0
1490	64.2857	All	p5_191205_191210_1_191210_a001	191205_191210_1	P5			1	0	0
1491	81.25	All	p5_191205_191210_1_191210_a001	191205_191210_1	P5			1	0	0
1492	85.7143	All	p5_191205_191210_1_191210_a001	191205_191210_1	P5			1	0	0
1493	50	All	p5_191205_191210_1_191210_a001	191205_191210_1	P5			0	1	0
1494	76	All	p5_191205_191210_1_191210_a001	191205_191210_1	P5			1	0	0
1495	62.963	All	p5_191205_191210_1_191210_a001	191205_191210_1	P5			1	0	0
1496	56	All	p5_191205_191210_1_191210_a001	191205_191210_1	P5			0	1	0
1497	27.2727	All	p5_191205_191210_1_191210_a001	191205_191210_1	P5			0	0	1
1498	69.697	All	p5_191205_191210_1_191210_a001	191205_191210_1	P5			1	0	0
1499	62.8571	All	p5_191205_191210_1_191210_a001	191205_191210_1	P5			1	0	0
1500	52.7778	All	p5_191205_191210_1_191210_a001	191205_191210_1	P5			0	1	0
1501	30.5556	All	p5_191205_191210_1_191210_a001	191205_191210_1	P5			0	0	1
1502	80	All	p5_191205_191210_1_191210_a001	191205_191210_1	P5			1	0	0
1503	91.6667	All	p5_191205_191210_1_191210_a001	191205_191210_1	P5			1	0	0
1504	60	All	p5_191205_191210_1_191210_a001	191205_191210_1	P5			0	1	0
1505	85.7143	All	p5_191205_191210_1_191210_a001	191205_191210_1	P5			1	0	0
1506	73.3333	All	p5_191205_191210_1_191210_a001	191205_191210_1	P5			1	0	0
1507	51.4286	All	p5_191205_191210_1_191210_a001	191205_191210_1	P5			0	1	0
1508	90	All	p5_191205_191210_1_191210_a001	191205_191210_1	P5			1	0	0
1509	75	All	p5_191205_191210_1_191210_a001	191205_191210_1	P5			1	0	0
1510	53.8462	All	p5_191205_191210_1_191210_a001	191205_191210_1	P5			0	1	0
1511	54.5455	All	p5_191205_191210_1_191210_a001	191205_191210_1	P5			0	1	0
1512	21.7391	All	p5_191205_191210_1_191210_a001	191205_191210_1	P5			0	0	1
1513	90	All	p5_191205_191210_1_191210_a001	191205_191210_1	P5			1	0	0
1514	68	All	p5_191205_191210_1_191210_a001	191205_191210_1	P5			1	0	0
1515	84.2105	All	p5_200306_200311_200311_a000	200306_200311	P5			1	0	0
1516	36.3014	All	p5_200306_200311_200311_a000	200306_200311	P5			0	0	1
1517	75.1825	All	p5_200306_200311_200311_a000	200306_200311	P5			1	0	0
1518	77.1084	All	p5_200306_200311_200311_a000	200306_200311	P5			1	0	0
1519	8.33333	All	p5_200306_200311_200311_a000	200306_200311	P5			0	0	1
1520	84.2105	All	p5_200306_200311_200311_a000	200306_200311	P5			1	0	0
1521	35.0515	All	p5_200306_200311_200311_a000	200306_200311	P5			0	0	1
1522	39.8601	All	p5_200306_200311_200311_a000	200306_200311	P5			0	0	1
1523	78.6667	All	p5_200306_200311_200311_a000	200306_200311	P5			1	0	0
1524	37.1134	All	p5_200306_200311_200311_a000	200306_200311	P5			0	0	1
1525	40	All	p5_200306_200311_200311_a000	200306_200311	P5			0	1	0
1526	60	All	p5_200306_200311_200311_a000	200306_200311	P5			0	1	0
1527	86.5672	All	p5_200306_200311_200311_a000	200306_200311	P5			1	0	0
1528	52.9412	All	p5_200306_200311_200311_a000	200306_200311	P5			0	1	0
1529	82.4561	All	p5_200306_200311_200311_a000	200306_200311	P5			1	0	0
1530	73.2394	All	p5_200306_200311_200311_a000	200306_200311	P5			1	0	0
1531	100	All	p5_200306_200311_200311_a000	200306_200311	P5			1	0	0
1532	26.2712	All	p5_200306_200311_200311_a000	200306_200311	P5			0	0	1
1533	20	All	p5_200306_200311_200311_a000	200306_200311	P5			0	0	1
1534	75	All	p5_200306_200311_200311_a000	200306_200311	P5			1	0	0
1535	100	All	p5_200306_200311_200311_a000	200306_200311	P5			1	0	0
1536	11.3924	All	p5_200306_200311_200311_a000	200306_200311	P5			0	0	1
1537	100	All	p5_200306_200311_200311_a000	200306_200311	P5			1	0	0
1538	41.6667	All	p5_200306_200311_200311_a000	200306_200311	P5			0	1	0
1539	18.9189	All	p5_200306_200311_200311_a000	200306_200311	P5			0	0	1
1540	80	All	p5_200306_200311_200311_a000	200306_200311	P5			1	0	0
1541	93.5484	All	p5_200306_200311_200311_a000	200306_200311	P5			1	0	0
1542	83.8983	All	p5_200306_200311_200311_a000	200306_200311	P5			1	0	0
1543	74.7368	All	p5_200306_200311_200311_a000	200306_200311	P5			1	0	0
1544	14.0845	All	p5_200306_200311_200311_a000	200306_200311	P5			0	0	1
1545	29.4479	All	p5_200306_200311_200311_a000	200306_200311	P5			0	0	1
1546	45.9677	All	p5_200306_200311_200311_a000	200306_200311	P5			0	1	0
1547	59.375	All	p5_200306_200311_200311_a000	200306_200311	P5			0	1	0
1548	56.6434	All	p5_200306_200311_200311_a000	200306_200311	P5			0	1	0
1549	95.8333	All	p5_200306_200311_200311_a000	200306_200311	P5			1	0	0
1550	77.7778	All	p5_200306_200311_200311_a000	200306_200311	P5			1	0	0
1551	76.3158	All	p5_200306_200311_200311_a000	200306_200311	P5			1	0	0
1552	88.5246	All	p5_200306_200311_200311_a000	200306_200311	P5			1	0	0
1553	74.6269	All	p5_200306_200311_200311_a000	200306_200311	P5			1	0	0
1554	94.4444	All	p5_200306_200311_200311_a000	200306_200311	P5			1	0	0
1555	47.1698	All	p5_200306_200311_200311_a000	200306_200311	P5			0	1	0
1556	87.7551	All	p5_200306_200311_200311_a000	200306_200311	P5			1	0	0
1557	97.5309	All	p5_200306_200311_200311_a000	200306_200311	P5			1	0	0
1558	81.9672	All	p5_200306_200311_200311_a000	200306_200311	P5			1	0	0
1559	96.0784	All	p5_200306_200311_200311_a000	200306_200311	P5			1	0	0
1560	50	All	p5_200306_200311_200311_a000	200306_200311	P5			0	1	0
1561	90.9091	All	p5_200306_200311_200311_a000	200306_200311	P5			1	0	0
1562	58.4906	All	p5_200306_200311_200311_a000	200306_200311	P5			0	1	0
1563	90.5405	All	p5_200306_200311_200311_a000	200306_200311	P5			1	0	0
1564	77.5	All	p5_200306_200311_200311_a000	200306_200311	P5			1	0	0
1565	67.0455	All	p5_200306_200311_200311_a000	200306_200311	P5			1	0	0
1566	90.4762	All	p5_200306_200311_200311_a000	200306_200311	P5			1	0	0
1567	77.0115	All	p5_200306_200311_200311_a000	200306_200311	P5			1	0	0
1568	95	All	p5_200306_200311_200311_a000	200306_200311	P5			1	0	0
1569	81.1881	All	p5_200306_200311_200311_a000	200306_200311	P5			1	0	0
1570	26.2295	All	p5_200306_200311_200311_a000	200306_200311	P5			0	0	1
1571	95.082	All	p5_200306_200311_200311_a000	200306_200311	P5			1	0	0
1572	96.9697	All	p5_200306_200311_200311_a000	200306_200311	P5			1	0	0
1573	80.8219	All	p5_200306_200311_200311_a000	200306_200311	P5			1	0	0
1574	73.4375	All	p5_200306_200311_200311_a000	200306_200311	P5			1	0	0
1575	57.9268	All	p5_200306_200311_200311_a000	200306_200311	P5			0	1	0
1576	63.0769	All	p5_200306_200311_200311_a000	200306_200311	P5			1	0	0
1577	95.3125	All	p5_200306_200311_200311_a000	200306_200311	P5			1	0	0
1578	89.2857	All	p5_200306_200311_200311_a000	200306_200311	P5			1	0	0
1579	100	All	p5_200306_200311_200311_a000	200306_200311	P5			1	0	0
1580	73.0769	All	p5_200306_200311_200311_a000	200306_200311	P5			1	0	0
1581	61.6541	All	p5_200306_200311_200311_a000	200306_200311	P5			1	0	0
1582	54.3689	All	p5_200306_200311_200311_a000	200306_200311	P5			0	1	0
1583	52.2727	All	p5_200306_200311_200311_a000	200306_200311	P5			0	1	0
1584	61.165	All	p5_200306_200311_200311_a000	200306_200311	P5			1	0	0
1585	92.5926	All	p5_200306_200311_200311_a000	200306_200311	P5			1	0	0
1586	87.0588	All	p5_200306_200311_200311_a000	200306_200311	P5			1	0	0
1587	91.8919	All	p5_200306_200311_200311_a000	200306_200311	P5			1	0	0
1588	82.6087	All	p5_200306_200311_200311_a000	200306_200311	P5			1	0	0
1589	65.4206	All	p5_200306_200311_200311_a000	200306_200311	P5			1	0	0
1590	80	All	p5_200306_200311_200311_a000	200306_200311	P5			1	0	0
1591	50	All	p5_200306_200311_200311_a000	200306_200311	P5			0	1	0
1592	78.9474	All	p5_200306_200311_200311_a000	200306_200311	P5			1	0	0
1593	92.8571	All	p5_200306_200311_200311_a000	200306_200311	P5			1	0	0
1594	52.6316	All	p5_200306_200311_200311_a000	200306_200311	P5			0	1	0
1595	100	All	p5_200306_200311_200311_a000	200306_200311	P5			1	0	0
1596	94.4444	All	p5_200306_200311_200311_a000	200306_200311	P5			1	0	0
1597	100	All	p5_200306_200311_200311_a000	200306_200311	P5			1	0	0
1598	68.3673	All	p5_200306_200311_200311_a000	200306_200311	P5			1	0	0
1599	34.2105	All	p5_200306_200311_200311_a000	200306_200311	P5			0	0	1
1600	29.4118	All	p5_200306_200311_200311_a000	200306_200311	P5			0	0	1
1601	36.3636	All	p5_200306_200311_200311_a000	200306_200311	P5			0	0	1
1602	69.6296	All	p5_200306_200311_200311_a000	200306_200311	P5			1	0	0
1603	61.9403	All	p5_200306_200311_200311_a000	200306_200311	P5			1	0	0
1604	45.3237	All	p5_200306_200311_200311_a000	200306_200311	P5			0	1	0
1605	32.2835	All	p5_200306_200311_200311_a000	200306_200311	P5			0	0	1
1606	73.3333	All	p5_200306_200311_200311_a000	200306_200311	P5			1	0	0
1607	49.2063	All	p5_200306_200311_200311_a000	200306_200311	P5			0	1	0
1608	40	All	p5_200306_200311_200311_a000	200306_200311	P5			0	1	0
1609	38.2353	All	p5_200306_200311_200311_a000	200306_200311	P5			0	0	1
1610	87.5	All	p5_200306_200311_200311_a000	200306_200311	P5			1	0	0
1611	72.8571	All	p5_200306_200311_200311_a000	200306_200311	P5			1	0	0
1612	32.8358	All	p5_200306_200311_200311_a000	200306_200311	P5			0	0	1
1613	18.9655	All	p5_200306_200311_200311_a000	200306_200311	P5			0	0	1
1614	50	All	p5_200306_200311_200311_a000	200306_200311	P5			0	1	0
1615	63.7681	All	p5_200306_200311_200311_a000	200306_200311	P5			1	0	0
1616	50.3401	All	p5_200306_200311_200311_a000	200306_200311	P5			0	1	0
1617	35.5072	All	p5_200306_200311_200311_a000	200306_200311	P5			0	0	1
1618	6.25	All	p5_200306_200311_200311_a000	200306_200311	P5			0	0	1
1619	58.4416	All	p5_200306_200311_200311_a000	200306_200311	P5			0	1	0
1620	49.4318	All	p5_200306_200311_200311_a000	200306_200311	P5			0	1	0
1621	19.2308	All	p5_200306_200311_200311_a000	200306_200311	P5			0	0	1
1622	80.4348	All	p5_200306_200311_200311_a000	200306_200311	P5			1	0	0
1623	60.2151	All	p5_200306_200311_200311_a000	200306_200311	P5			1	0	0
1624	38.7931	All	p5_200306_200311_200311_a000	200306_200311	P5			0	0	1
1625	62.0482	All	p5_200306_200311_200311_a000	200306_200311	P5			1	0	0
1626	34.6154	All	p5_200306_200311_200311_a000	200306_200311	P5			0	0	1
1627	68.4211	All	p5_200306_200311_200311_a000	200306_200311	P5			1	0	0
1628	65.7534	All	p5_200306_200311_200311_a000	200306_200311	P5			1	0	0
1629	57.377	All	p5_200306_200311_200311_a000	200306_200311	P5			0	1	0
1630	86.9565	All	p5_200306_200311_200311_a000	200306_200311	P5			1	0	0
1631	36.3636	All	p5_200306_200311_200311_a000	200306_200311	P5			0	0	1
1632	83.0508	All	p5_200306_200311_200311_a000	200306_200311	P5			1	0	0
1633	48.3871	All	p5_200306_200311_200311_a000	200306_200311	P5			0	1	0
1634	52.8302	All	p5_200306_200311_200311_a000	200306_200311	P5			0	1	0
1635	51.0067	All	p5_200306_200311_200311_a000	200306_200311	P5			0	1	0
1636	31.5436	All	p5_200306_200311_200311_a000	200306_200311	P5			0	0	1
1637	34.7222	All	p5_200306_200311_200311_a000	200306_200311	P5			0	0	1
1638	80.3279	All	p5_200306_200311_200311_a000	200306_200311	P5			1	0	0
1639	24.4444	All	p5_200306_200311_200311_a000	200306_200311	P5			0	0	1
1640	75.6098	All	p5_200306_200311_200311_a000	200306_200311	P5			1	0	0
1641	71.0526	All	p5_200306_200311_200311_a000	200306_200311	P5			1	0	0
1642	68.9394	All	p5_200306_200311_200311_a000	200306_200311	P5			1	0	0
1643	90	All	p5_200306_200311_200311_a000	200306_200311	P5			1	0	0
1644	82.5	All	p5_200306_200311_200311_a000	200306_200311	P5			1	0	0
1645	57.764	All	p5_200306_200311_200311_a000	200306_200311	P5			0	1	0
1646	46.875	All	p5_200306_200311_200311_a000	200306_200311	P5			0	1	0
1647	42.1384	All	p5_200306_200311_200311_a000	200306_200311	P5			0	1	0
1648	55.814	All	p5_200306_200311_200311_a000	200306_200311	P5			0	1	0
1649	67.9688	All	p5_200306_200311_200311_a000	200306_200311	P5			1	0	0
1650	62.5	All	p5_200306_200311_200311_a000	200306_200311	P5			1	0	0
1651	77.451	All	p5_200306_200311_200311_a000	200306_200311	P5			1	0	0
1652	52.1127	All	p5_200306_200311_200311_a000	200306_200311	P5			0	1	0
1653	71.1712	All	p5_200306_200311_200311_a000	200306_200311	P5			1	0	0
1654	63.0058	All	p5_200306_200311_200311_a000	200306_200311	P5			1	0	0
1655	41.3793	All	p5_200306_200311_200311_a000	200306_200311	P5			0	1	0
1656	21.6418	All	p5_200306_200311_200311_a000	200306_200311	P5			0	0	1
1657	30.4878	All	p5_200306_200311_200311_a000	200306_200311	P5			0	0	1
1658	79.7101	All	p5_200306_200311_200311_a000	200306_200311	P5			1	0	0
1659	35.8696	All	p5_200306_200311_200311_a000	200306_200311	P5			0	0	1
1660	64.0244	All	p5_200306_200311_200311_a000	200306_200311	P5			1	0	0
1661	54.0984	All	p5_200306_200311_200311_a000	200306_200311	P5			0	1	0
1662	59.1549	All	p5_200306_200311_200311_a000	200306_200311	P5			0	1	0
1663	25.7143	All	p5_200306_200311_200311_a000	200306_200311	P5			0	0	1
1664	89.8305	All	p5_200306_200311_200311_a000	200306_200311	P5			1	0	0
1665	64.8148	All	p5_200306_200311_200311_a000	200306_200311	P5			1	0	0
1666	28	All	p5_200306_200311_200311_a000	200306_200311	P5			0	0	1
1667	27.2727	All	p5_200306_200311_200311_a000	200306_200311	P5			0	0	1
1668	49.4382	All	p5_200306_200311_200311_a000	200306_200311	P5			0	1	0
1669	59.3023	All	p5_200306_200311_200311_a000	200306_200311	P5			0	1	0
1670	15.1515	All	p5_200306_200311_200311_a000	200306_200311	P5			0	0	1
1671	54.321	All	p5_200306_200311_200311_a000	200306_200311	P5			0	1	0
1672	44.4444	All	p5_200306_200311_200311_a000	200306_200311	P5			0	1	0
1673	40.708	All	p5_200306_200311_200311_a000	200306_200311	P5			0	1	0
1674	47.2727	All	p5_200306_200311_200311_a000	200306_200311	P5			0	1	0
1675	66.0377	All	p5_200306_200311_200311_a000	200306_200311	P5			1	0	0
1676	5	All	p5_200306_200311_200311_a000	200306_200311	P5			0	0	1
1677	65.7534	All	p5_200306_200311_200311_a000	200306_200311	P5			1	0	0
1678	82.4176	All	p5_200306_200311_200311_a000	200306_200311	P5			1	0	0
1679	78.9474	All	p5_200306_200311_200311_a000	200306_200311	P5			1	0	0
1680	71.8519	All	p5_200306_200311_200311_a000	200306_200311	P5			1	0	0
1681	57.8571	All	p5_200306_200311_200311_a000	200306_200311	P5			0	1	0
1682	28.3333	All	p5_200306_200311_200311_a000	200306_200311	P5			0	0	1
1683	49.2063	All	p5_200306_200311_200311_a000	200306_200311	P5			0	1	0
1684	24.7619	All	p5_200306_200311_200311_a000	200306_200311	P5			0	0	1
1685	49.4318	All	p5_200306_200311_200311_a000	200306_200311	P5			0	1	0
1686	80.4348	All	p5_200306_200311_200311_a000	200306_200311	P5			1	0	0
1687	64.4172	All	p5_200306_200311_200311_a000	200306_200311	P5			1	0	0
1688	86.8132	All	p5_200306_200311_200311_a000	200306_200311	P5			1	0	0
1689	81.3187	All	p5_200306_200311_200311_a000	200306_200311	P5			1	0	0
1690	54.3046	All	p5_200306_200311_200311_a000	200306_200311	P5			0	1	0
1691	24.0602	All	p5_200306_200311_200311_a000	200306_200311	P5			0	0	1
1692	63.1579	All	p5_200306_200311_200311_a000	200306_200311	P5			1	0	0
1693	90	All	p5_200306_200311_200311_a000	200306_200311	P5			1	0	0
1694	42.1384	All	p5_200306_200311_200311_a000	200306_200311	P5			0	1	0
1695	71.1712	All	p5_200306_200311_200311_a000	200306_200311	P5			1	0	0
1696	46.5839	All	p5_200306_200311_200311_a000	200306_200311	P5			0	1	0
1697	41.3793	All	p5_200306_200311_200311_a000	200306_200311	P5			0	1	0
1698	71.5152	All	p5_200306_200311_200311_a000	200306_200311	P5			1	0	0
1699	65.2482	All	p5_200306_200311_200311_a000	200306_200311	P5			1	0	0
1700	54.0984	All	p5_200306_200311_200311_a000	200306_200311	P5			0	1	0
1701	59.1549	All	p5_200306_200311_200311_a000	200306_200311	P5			0	1	0
1702	85.2459	All	p5_200306_200311_200311_a000	200306_200311	P5			1	0	0
1703	61.9469	All	p5_200306_200311_200311_a000	200306_200311	P5			1	0	0
1704	90.4348	All	p5_200306_200311_200311_a000	200306_200311	P5			1	0	0
1705	80.1527	All	p5_200306_200311_200311_a000	200306_200311	P5			1	0	0
1706	59.3023	All	p5_200306_200311_200311_a000	200306_200311	P5			0	1	0
1707	16.6667	All	p5_200306_200311_200311_a000	200306_200311	P5			0	0	1
1708	38.7097	All	p5_200306_200311_200311_a000	200306_200311	P5			0	0	1
1709	46.7213	All	p5_200306_200311_200311_a000	200306_200311	P5			0	1	0
1710	5	All	p5_200306_200311_200311_a000	200306_200311	P5			0	0	1
1711	65.7534	All	p5_200306_200311_200311_a000	200306_200311	P5			1	0	0
1712	82.4176	All	p5_200306_200311_200311_a000	200306_200311	P5			1	0	0
1713	50	All	p5_200306_200311_200311_a000	200306_200311	P5			0	1	0
1714	33.3333	All	p5_200306_200311_200311_a000	200306_200311	P5			0	0	1
1715	36.3636	All	p5_200306_200311_200311_a000	200306_200311	P5			0	0	1
1716	46.3235	All	p5_200306_200311_200311_a000	200306_200311	P5			0	1	0
1717	28.3333	All	p5_200306_200311_200311_a000	200306_200311	P5			0	0	1
1718	47.619	All	p5_200306_200311_200311_a000	200306_200311	P5			0	1	0
1719	25	All	p5_200306_200311_200311_a000	200306_200311	P5			0	0	1
1720	33.3333	All	p5_200306_200311_200311_a000	200306_200311	P5			0	0	1
1721	87.5	All	p5_200306_200311_200311_a000	200306_200311	P5			1	0	0
1722	48.8764	All	p5_200306_200311_200311_a000	200306_200311	P5			0	1	0
1723	35.0318	All	p5_200306_200311_200311_a000	200306_200311	P5			0	0	1
1724	69.9248	All	p5_200306_200311_200311_a000	200306_200311	P5			1	0	0
1725	54.6875	All	p5_200306_200311_200311_a000	200306_200311	P5			0	1	0
1726	17.2414	All	p5_200306_200311_200311_a000	200306_200311	P5			0	0	1
1727	68.4211	All	p5_200306_200311_200311_a000	200306_200311	P5			1	0	0
1728	75.4386	All	p5_200306_200311_200311_a000	200306_200311	P5			1	0	0
1729	48.3871	All	p5_200306_200311_200311_a000	200306_200311	P5			0	1	0
1730	51.0067	All	p5_200306_200311_200311_a000	200306_200311	P5			0	1	0
1731	24.4444	All	p5_200306_200311_200311_a000	200306_200311	P5			0	0	1
1732	79.5699	All	p5_200306_200311_200311_a000	200306_200311	P5			1	0	0
1733	63.1579	All	p5_200306_200311_200311_a000	200306_200311	P5			1	0	0
1734	62.2222	All	p5_200306_200311_200311_a000	200306_200311	P5			1	0	0
1735	90	All	p5_200306_200311_200311_a000	200306_200311	P5			1	0	0
1736	86.8421	All	p5_200306_200311_200311_a000	200306_200311	P5			1	0	0
1737	42.6752	All	p5_200306_200311_200311_a000	200306_200311	P5			0	1	0
1738	38.4615	All	p5_200306_200311_200311_a000	200306_200311	P5			0	0	1
1739	94.0678	All	p5_200306_200311_200311_a000	200306_200311	P5			1	0	0
1740	55.8333	All	p5_200306_200311_200311_a000	200306_200311	P5			0	1	0
1741	19.8198	All	p5_200306_200311_200311_a000	200306_200311	P5			0	0	1
1742	59.1549	All	p5_200306_200311_200311_a000	200306_200311	P5			0	1	0
1743	64.8148	All	p5_200306_200311_200311_a000	200306_200311	P5			1	0	0
1744	72.4638	All	p5_200306_200311_200311_a000	200306_200311	P5			1	0	0
1745	20.7407	All	p5_200306_200311_200311_a000	200306_200311	P5			0	0	1
1746	44.4444	All	p5_200306_200311_200311_a000	200306_200311	P5			0	1	0
1747	5	All	p5_200306_200311_200311_a000	200306_200311	P5			0	0	1
1748	78.9474	All	p5_200306_200311_200311_a000	200306_200311	P5			1	0	0
1749	25	All	p5_200306_200311_200311_a000	200306_200311	P5			0	0	1
1750	42.1384	All	p5_200306_200311_200311_a000	200306_200311	P5			0	1	0
1751	54.1667	All	p5_200306_200311_200311_a000	200306_200311	P5			0	1	0
1752	51	All	p5_200306_200311_200311_a000	200306_200311	P5			0	1	0
1753	45.9893	All	p5_200306_200311_200311_a000	200306_200311	P5			0	1	0
1754	82.4176	All	p5_200306_200311_200311_a000	200306_200311	P5			1	0	0
1755	78.9474	All	p5_200306_200311_200311_a000	200306_200311	P5			1	0	0
1756	36.5079	All	p5_200306_200311_200311_a000	200306_200311	P5			0	0	1
1757	68.8889	All	p5_200306_200311_200311_a000	200306_200311	P5			1	0	0
1758	28.3333	All	p5_200306_200311_200311_a000	200306_200311	P5			0	0	1
1759	63.7681	All	p5_200306_200311_200311_a000	200306_200311	P5			1	0	0
1760	46.9274	All	p5_200306_200311_200311_a000	200306_200311	P5			0	1	0
1761	79.3478	All	p5_200306_200311_200311_a000	200306_200311	P5			1	0	0
1762	60.9195	All	p5_200306_200311_200311_a000	200306_200311	P5			1	0	0
1763	50.6098	All	p5_200306_200311_200311_a000	200306_200311	P5			0	1	0
1764	65.1515	All	p5_200306_200311_200311_a000	200306_200311	P5			1	0	0
1765	81.3187	All	p5_200306_200311_200311_a000	200306_200311	P5			1	0	0
1766	83.0508	All	p5_200306_200311_200311_a000	200306_200311	P5			1	0	0
1767	61.2903	All	p5_200306_200311_200311_a000	200306_200311	P5			1	0	0
1768	51.0067	All	p5_200306_200311_200311_a000	200306_200311	P5			0	1	0
1769	79.5699	All	p5_200306_200311_200311_a000	200306_200311	P5			1	0	0
1770	68.2171	All	p5_200306_200311_200311_a000	200306_200311	P5			1	0	0
1771	90	All	p5_200306_200311_200311_a000	200306_200311	P5			1	0	0
1772	82.5	All	p5_200306_200311_200311_a000	200306_200311	P5			1	0	0
1773	42.9487	All	p5_200306_200311_200311_a000	200306_200311	P5			0	1	0
1774	63.6872	All	p5_200306_200311_200311_a000	200306_200311	P5			1	0	0
1775	69.3878	All	p5_200306_200311_200311_a000	200306_200311	P5			1	0	0
1776	56.5476	All	p5_200306_200311_200311_a000	200306_200311	P5			0	1	0
1777	38.7755	All	p5_200306_200311_200311_a000	200306_200311	P5			0	0	1
1778	47.561	All	p5_200306_200311_200311_a000	200306_200311	P5			0	1	0
1779	94.1176	All	p5_200306_200311_200311_a000	200306_200311	P5			1	0	0
1780	65.2482	All	p5_200306_200311_200311_a000	200306_200311	P5			1	0	0
1781	55.8333	All	p5_200306_200311_200311_a000	200306_200311	P5			0	1	0
1782	59.1549	All	p5_200306_200311_200311_a000	200306_200311	P5			0	1	0
1783	82.0225	All	p5_200306_200311_200311_a000	200306_200311	P5			1	0	0
1784	86.9565	All	p5_200306_200311_200311_a000	200306_200311	P5			1	0	0
1785	60.479	All	p5_200306_200311_200311_a000	200306_200311	P5			1	0	0
1786	16.6667	All	p5_200306_200311_200311_a000	200306_200311	P5			0	0	1
1787	45.9893	All	p5_200306_200311_200311_a000	200306_200311	P5			0	1	0
1788	50	All	p5_200306_200311_200311_a000	200306_200311	P5			0	1	0
1789	64.4231	All	p5_200306_200311_200311_a000	200306_200311	P5			1	0	0
1790	65.3226	All	p5_200306_200311_200311_a000	200306_200311	P5			1	0	0
1791	82.4176	All	p5_200306_200311_200311_a000	200306_200311	P5			1	0	0
1792	76.1905	All	p5_200306_200311_200311_a000	200306_200311	P5			1	0	0
1793	94.4444	All	p5_200306_200311_200311_a000	200306_200311	P5			1	0	0
1794	38.0531	All	p5_200306_200311_200311_a001	200306_200311	P5			0	0	1
1795	39.2857	All	p5_200306_200311_200311_a001	200306_200311	P5			0	0	1
1796	15.3846	All	p5_200306_200311_200311_a001	200306_200311	P5			0	0	1
1797	40	All	p5_200306_200311_200311_a001	200306_200311	P5			0	1	0
1798	100	All	p5_200306_200311_200311_a001	200306_200311	P5			1	0	0
1799	28.8462	All	p5_200306_200311_200311_a001	200306_200311	P5			0	0	1
1800	16.3934	All	p5_200306_200311_200311_a001	200306_200311	P5			0	0	1
1801	6.25	All	p5_200306_200311_200311_a001	200306_200311	P5			0	0	1
1802	40	All	p5_200306_200311_200311_a001	200306_200311	P5			0	1	0
1803	14.2857	All	p5_200306_200311_200311_a001	200306_200311	P5			0	0	1
1804	23.0769	All	p5_200306_200311_200311_a001	200306_200311	P5			0	0	1
1805	90.4762	All	p5_200306_200311_200311_a001	200306_200311	P5			1	0	0
1806	26.9663	All	p5_200306_200311_200311_a001	200306_200311	P5			0	0	1
1807	20	All	p5_200306_200311_200311_a001	200306_200311	P5			0	0	1
1808	96.875	All	p5_200306_200311_200311_a001	200306_200311	P5			1	0	0
1809	5.19481	All	p5_200306_200311_200311_a001	200306_200311	P5			0	0	1
1810	12.5	All	p5_200306_200311_200311_a001	200306_200311	P5			0	0	1
1811	28.5714	All	p5_200306_200311_200311_a001	200306_200311	P5			0	0	1
1812	100	All	p5_200306_200311_200311_a001	200306_200311	P5			1	0	0
1813	63.6364	All	p5_200306_200311_200311_a001	200306_200311	P5			1	0	0
1814	57.5342	All	p5_200306_200311_200311_a001	200306_200311	P5			0	1	0
1815	100	All	p5_200306_200311_200311_a001	200306_200311	P5			1	0	0
1816	81.1594	All	p5_200306_200311_200311_a001	200306_200311	P5			1	0	0
1817	77.2727	All	p5_200306_200311_200311_a001	200306_200311	P5			1	0	0
1818	96.7742	All	p5_200306_200311_200311_a001	200306_200311	P5			1	0	0
1819	27.7778	All	p5_200306_200311_200311_a001	200306_200311	P5			0	0	1
1820	100	All	p5_200306_200311_200311_a001	200306_200311	P5			1	0	0
1821	100	All	p5_200306_200311_200311_a001	200306_200311	P5			1	0	0
1822	100	All	p5_200306_200311_200311_a001	200306_200311	P5			1	0	0
1823	98.0392	All	p5_200306_200311_200311_a001	200306_200311	P5			1	0	0
1824	41.6667	All	p5_200306_200311_200311_a001	200306_200311	P5			0	1	0
1825	21.4286	All	p5_200306_200311_200311_a001	200306_200311	P5			0	0	1
1826	42.6966	All	p5_200306_200311_200311_a001	200306_200311	P5			0	1	0
1827	79.3103	All	p5_200306_200311_200311_a001	200306_200311	P5			1	0	0
1828	83.3333	All	p5_200306_200311_200311_a001	200306_200311	P5			1	0	0
1829	83.1169	All	p5_200306_200311_200311_a001	200306_200311	P5			1	0	0
1830	60.2941	All	p5_200306_200311_200311_a001	200306_200311	P5			1	0	0
1831	47.5524	All	p5_200306_200311_200311_a001	200306_200311	P5			0	1	0
1832	35	All	p5_200306_200311_200311_a001	200306_200311	P5			0	0	1
1833	100	All	p5_200306_200311_200311_a001	200306_200311	P5			1	0	0
1834	100	All	p5_200306_200311_200311_a001	200306_200311	P5			1	0	0
1835	84.4828	All	p5_200306_200311_200311_a001	200306_200311	P5			1	0	0
1836	85.2941	All	p5_200306_200311_200311_a001	200306_200311	P5			1	0	0
1837	34.3284	All	p5_200306_200311_200311_a001	200306_200311	P5			0	0	1
1838	77.0833	All	p5_200306_200311_200311_a001	200306_200311	P5			1	0	0
1839	44.186	All	p5_200306_200311_200311_a001	200306_200311	P5			0	1	0
1840	90.566	All	p5_200306_200311_200311_a001	200306_200311	P5			1	0	0
1841	8.69565	All	p5_200306_200311_200311_a001	200306_200311	P5			0	0	1
1842	62.5	All	p5_200306_200311_200311_a001	200306_200311	P5			1	0	0
1843	92.3077	All	p5_200306_200311_200311_a001	200306_200311	P5			1	0	0
1844	97.561	All	p5_200306_200311_200311_a001	200306_200311	P5			1	0	0
1845	82.0513	All	p5_200306_200311_200311_a001	200306_200311	P5			1	0	0
1846	20.2703	All	p5_200306_200311_200311_a001	200306_200311	P5			0	0	1
1847	87.5	All	p5_200306_200311_200311_a001	200306_200311	P5			1	0	0
1848	33.3333	All	p5_200306_200311_200311_a001	200306_200311	P5			0	0	1
1849	79.3103	All	p5_200306_200311_200311_a001	200306_200311	P5			1	0	0
1850	78.3505	All	p5_200306_200311_200311_a001	200306_200311	P5			1	0	0
1851	17.3913	All	p5_200306_200311_200311_a001	200306_200311	P5			0	0	1
1852	8.10811	All	p5_200306_200311_200311_a001	200306_200311	P5			0	0	1
1853	10.3448	All	p5_200306_200311_200311_a001	200306_200311	P5			0	0	1
1854	25	All	p5_200306_200311_200311_a001	200306_200311	P5			0	0	1
1855	60.4167	All	p5_200306_200311_200311_a001	200306_200311	P5			1	0	0
1856	74.359	All	p5_200306_200311_200311_a001	200306_200311	P5			1	0	0
1857	26.9841	All	p5_200306_200311_200311_a001	200306_200311	P5			0	0	1
1858	85.7143	All	p5_200306_200311_200311_a001	200306_200311	P5			1	0	0
1859	71.9101	All	p5_200306_200311_200311_a001	200306_200311	P5			1	0	0
1860	77.9221	All	p5_200306_200311_200311_a001	200306_200311	P5			1	0	0
1861	13.4328	All	p5_200306_200311_200311_a001	200306_200311	P5			0	0	1
1862	58.8235	All	p5_200306_200311_200311_a001	200306_200311	P5			0	1	0
1863	79.3814	All	p5_200306_200311_200311_a001	200306_200311	P5			1	0	0
1864	46.9388	All	p5_200306_200311_200311_a001	200306_200311	P5			0	1	0
1865	68.4211	All	p5_200306_200311_200311_a001	200306_200311	P5			1	0	0
1866	90.9091	All	p5_200306_200311_200311_a001	200306_200311	P5			1	0	0
1867	78.7234	All	p5_200306_200311_200311_a001	200306_200311	P5			1	0	0
1868	87.7778	All	p5_200306_200311_200311_a001	200306_200311	P5			1	0	0
1869	28.5714	All	p5_200306_200311_200311_a001	200306_200311	P5			0	0	1
1870	16.6667	All	p5_200306_200311_200311_a001	200306_200311	P5			0	0	1
1871	78.125	All	p5_200306_200311_200311_a001	200306_200311	P5			1	0	0
1872	15.1515	All	p5_200306_200311_200311_a001	200306_200311	P5			0	0	1
1873	78.3505	All	p5_200306_200311_200311_a001	200306_200311	P5			1	0	0
1874	46.3918	All	p5_200306_200311_200311_a001	200306_200311	P5			0	1	0
1875	21.4286	All	p5_200306_200311_200311_a001	200306_200311	P5			0	0	1
1876	85.7143	All	p5_200306_200311_200311_a001	200306_200311	P5			1	0	0
1877	76.3441	All	p5_200306_200311_200311_a001	200306_200311	P5			1	0	0
1878	31.9444	All	p5_200306_200311_200311_a001	200306_200311	P5			0	0	1
1879	90.1639	All	p5_200306_200311_200311_a001	200306_200311	P5			1	0	0
1880	18.1818	All	p5_200306_200311_200311_a001	200306_200311	P5			0	0	1
1881	68.75	All	p5_200306_200311_200311_a001	200306_200311	P5			1	0	0
1882	41.9048	All	p5_200306_200311_200311_a001	200306_200311	P5			0	1	0
1883	16.8539	All	p5_200306_200311_200311_a001	200306_200311	P5			0	0	1
1884	86.3636	All	p5_200306_200311_200311_a001	200306_200311	P5			1	0	0
1885	97	All	p5_200306_200311_200311_a001	200306_200311	P5			1	0	0
1886	51.3761	All	p5_200306_200311_200311_a001	200306_200311	P5			0	1	0
1887	65.2174	All	p5_200306_200311_200311_a001	200306_200311	P5			1	0	0
1888	46.9027	All	p5_200306_200311_200311_a001	200306_200311	P5			0	1	0
1889	6.81818	All	p5_200306_200311_200311_a001	200306_200311	P5			0	0	1
1890	100	All	p5_200306_200311_200311_a001	200306_200311	P5			1	0	0
1891	71.4286	All	p5_200306_200311_200311_a001	200306_200311	P5			1	0	0
1892	64.6018	All	p5_200306_200311_200311_a001	200306_200311	P5			1	0	0
1893	49.1803	All	p5_200306_200311_200311_a001	200306_200311	P5			0	1	0
1894	35.2273	All	p5_200306_200311_200311_a001	200306_200311	P5			0	0	1
1895	39.7436	All	p5_200306_200311_200311_a001	200306_200311	P5			0	0	1
1896	30.7692	All	p5_200306_200311_200311_a001	200306_200311	P5			0	0	1
1897	25	All	p5_200306_200311_200311_a001	200306_200311	P5			0	0	1
1898	11.4286	All	p5_200306_200311_200311_a001	200306_200311	P5			0	0	1
1899	36.1905	All	p5_200306_200311_200311_a001	200306_200311	P5			0	0	1
1900	23.6559	All	p5_200306_200311_200311_a001	200306_200311	P5			0	0	1
1901	96.4912	All	p5_200306_200311_200311_a001	200306_200311	P5			1	0	0
1902	37.2881	All	p5_200306_200311_200311_a001	200306_200311	P5			0	0	1
1903	17.6471	All	p5_200306_200311_200311_a001	200306_200311	P5			0	0	1
1904	68.75	All	p5_200306_200311_200311_a001	200306_200311	P5			1	0	0
1905	75.5556	All	p5_200306_200311_200311_a001	200306_200311	P5			1	0	0
1906	85.9649	All	p5_200306_200311_200311_a001	200306_200311	P5			1	0	0
1907	81.9672	All	p5_200306_200311_200311_a001	200306_200311	P5			1	0	0
1908	72.1311	All	p5_200306_200311_200311_a001	200306_200311	P5			1	0	0
1909	18.6441	All	p5_200306_200311_200311_a001	200306_200311	P5			0	0	1
1910	35	All	p5_200306_200311_200311_a001	200306_200311	P5			0	0	1
1911	42.1769	All	p5_200306_200311_200311_a001	200306_200311	P5			0	1	0
1912	60	All	p5_200306_200311_200311_a001	200306_200311	P5			0	1	0
1913	55.5556	All	p5_200306_200311_200311_a001	200306_200311	P5			0	1	0
1914	44.1667	All	p5_200306_200311_200311_a001	200306_200311	P5			0	1	0
1915	100	All	p5_200306_200311_200311_a001	200306_200311	P5			1	0	0
1916	71.1864	All	p5_200306_200311_200311_a001	200306_200311	P5			1	0	0
1917	61.3636	All	p5_200306_200311_200311_a001	200306_200311	P5			1	0	0
1918	43.1818	All	p5_200306_200311_200311_a001	200306_200311	P5			0	1	0
1919	14.2857	All	p5_200306_200311_200311_a001	200306_200311	P5			0	0	1
1920	17.3913	All	p5_200306_200311_200311_a001	200306_200311	P5			0	0	1
1921	53.3333	All	p5_200306_200311_200311_a001	200306_200311	P5			0	1	0
1922	94.4444	All	p5_200306_200311_200311_a001	200306_200311	P5			1	0	0
1923	50.9804	All	p5_200306_200311_200311_a001	200306_200311	P5			0	1	0
1924	22.2222	All	p5_200306_200311_200311_a001	200306_200311	P5			0	0	1
1925	90.566	All	p5_200306_200311_200311_a001	200306_200311	P5			1	0	0
1926	28.3019	All	p5_200306_200311_200311_a001	200306_200311	P5			0	0	1
1927	50	All	p5_200306_200311_200311_a001	200306_200311	P5			0	1	0
1928	41.9355	All	p5_200306_200311_200311_a001	200306_200311	P5			0	1	0
1929	19.6721	All	p5_200306_200311_200311_a001	200306_200311	P5			0	0	1
1930	35.4839	All	p5_200306_200311_200311_a001	200306_200311	P5			0	0	1
1931	64	All	p5_200306_200311_200311_a001	200306_200311	P5			1	0	0
1932	7.69231	All	p5_200306_200311_200311_a001	200306_200311	P5			0	0	1
1933	81.25	All	p5_200306_200311_200311_a001	200306_200311	P5			1	0	0
1934	94.7368	All	p5_200306_200311_200311_a001	200306_200311	P5			1	0	0
1935	0	All	p5_200306_200311_200311_a001	200306_200311	P5			0	0	1
1936	16.3265	All	p5_200306_200311_200311_a001	200306_200311	P5			0	0	1
1937	25	All	p5_200306_200311_200311_a001	200306_200311	P5			0	0	1
1938	100	All	p5_200306_200311_200311_a001	200306_200311	P5			1	0	0
1939	100	All	p5_200306_200311_200311_a001	200306_200311	P5			1	0	0
1940	38.7097	All	p5_200306_200311_200311_a001	200306_200311	P5			0	0	1
1941	92.8571	All	p5_200306_200311_200311_a001	200306_200311	P5			1	0	0
1942	50.7246	All	p5_200306_200311_200311_a001	200306_200311	P5			0	1	0
1943	16.4179	All	p5_200306_200311_200311_a001	200306_200311	P5			0	0	1
1944	13.6364	All	p5_200306_200311_200311_a001	200306_200311	P5			0	0	1
1945	83.3333	All	p5_200306_200311_200311_a001	200306_200311	P5			1	0	0
1946	87.1795	All	p5_200306_200311_200311_a001	200306_200311	P5			1	0	0
1947	64.5161	All	p5_200306_200311_200311_a001	200306_200311	P5			1	0	0
1948	0	All	p5_200306_200311_200311_a001	200306_200311	P5			0	0	1
1949	93.75	All	p5_200306_200311_200311_a001	200306_200311	P5			1	0	0
1950	67.3469	All	p5_200306_200311_200311_a001	200306_200311	P5			1	0	0
1951	43.2432	All	p5_200306_200311_200311_a001	200306_200311	P5			0	1	0
1952	37.7358	All	p5_200306_200311_200311_a001	200306_200311	P5			0	0	1
1953	51.7241	All	p5_200306_200311_200311_a001	200306_200311	P5			0	1	0
1954	81.7204	All	p5_200306_200311_200311_a001	200306_200311	P5			1	0	0
1955	84.4828	All	p5_200306_200311_200311_a001	200306_200311	P5			1	0	0
1956	91.6667	All	p5_200306_200311_200311_a001	200306_200311	P5			1	0	0
1957	78.3505	All	p5_200306_200311_200311_a001	200306_200311	P5			1	0	0
1958	92.8571	All	p5_200306_200311_200311_a001	200306_200311	P5			1	0	0
1959	24.2105	All	p5_200306_200311_200311_a001	200306_200311	P5			0	0	1
1960	25	All	p5_200306_200311_200311_a001	200306_200311	P5			0	0	1
1961	74.359	All	p5_200306_200311_200311_a001	200306_200311	P5			1	0	0
1962	71.9101	All	p5_200306_200311_200311_a001	200306_200311	P5			1	0	0
1963	58.8235	All	p5_200306_200311_200311_a001	200306_200311	P5			0	1	0
1964	53.6842	All	p5_200306_200311_200311_a001	200306_200311	P5			0	1	0
1965	74.5763	All	p5_200306_200311_200311_a001	200306_200311	P5			1	0	0
1966	32.7273	All	p5_200306_200311_200311_a001	200306_200311	P5			0	0	1
1967	25	All	p5_200306_200311_200311_a001	200306_200311	P5			0	0	1
1968	81.25	All	p5_200306_200311_200311_a001	200306_200311	P5			1	0	0
1969	85.7143	All	p5_200306_200311_200311_a001	200306_200311	P5			1	0	0
1970	39.726	All	p5_200306_200311_200311_a001	200306_200311	P5			0	0	1
1971	13.4615	All	p5_200306_200311_200311_a001	200306_200311	P5			0	0	1
1972	35.6436	All	p5_200306_200311_200311_a001	200306_200311	P5			0	0	1
1973	86.3636	All	p5_200306_200311_200311_a001	200306_200311	P5			1	0	0
1974	39.7436	All	p5_200306_200311_200311_a001	200306_200311	P5			0	0	1
1975	11.4286	All	p5_200306_200311_200311_a001	200306_200311	P5			0	0	1
1976	25.4902	All	p5_200306_200311_200311_a001	200306_200311	P5			0	0	1
1977	94.7368	All	p5_200306_200311_200311_a001	200306_200311	P5			1	0	0
1978	33.8983	All	p5_200306_200311_200311_a001	200306_200311	P5			0	0	1
1979	13.0435	All	p5_200306_200311_200311_a001	200306_200311	P5			0	0	1
1980	68.75	All	p5_200306_200311_200311_a001	200306_200311	P5			1	0	0
1981	39.8693	All	p5_200306_200311_200311_a001	200306_200311	P5			0	0	1
1982	69.6629	All	p5_200306_200311_200311_a001	200306_200311	P5			1	0	0
1983	14.2857	All	p5_200306_200311_200311_a001	200306_200311	P5			0	0	1
1984	14.2857	All	p5_200306_200311_200311_a001	200306_200311	P5			0	0	1
1985	53.3333	All	p5_200306_200311_200311_a001	200306_200311	P5			0	1	0
1986	60.7843	All	p5_200306_200311_200311_a001	200306_200311	P5			1	0	0
1987	19.2308	All	p5_200306_200311_200311_a001	200306_200311	P5			0	0	1
1988	22.2222	All	p5_200306_200311_200311_a001	200306_200311	P5			0	0	1
1989	28.3019	All	p5_200306_200311_200311_a001	200306_200311	P5			0	0	1
1990	40	All	p5_200306_200311_200311_a001	200306_200311	P5			0	1	0
1991	64	All	p5_200306_200311_200311_a001	200306_200311	P5			1	0	0
1992	11.5385	All	p5_200306_200311_200311_a001	200306_200311	P5			0	0	1
1993	94.7368	All	p5_200306_200311_200311_a001	200306_200311	P5			1	0	0
1994	27.5862	All	p5_200306_200311_200311_a001	200306_200311	P5			0	0	1
1995	38.7097	All	p5_200306_200311_200311_a001	200306_200311	P5			0	0	1
1996	68.4211	All	p5_200306_200311_200311_a001	200306_200311	P5			1	0	0
1997	11.4754	All	p5_200306_200311_200311_a001	200306_200311	P5			0	0	1
1998	92.8571	All	p5_200306_200311_200311_a001	200306_200311	P5			1	0	0
[truncated: 5,375 more rows]

## Sheet: average
Age	Mouse ID	% activation
5	190320_190325	80.9861
5	191205_191210_0	66.807
5	191205_191210_1	67.8359
5	200306_200311	59.0039
6	180201_180207	69.9111
6	190921_190927_1	62.0054
6	191205_191211_1	62.2457
7	180201_180208	56.8721
7	190226_190305	60.3971
7	190320_190327	66.15
7	200103_200110_0	54.0083
7	200206_200213	65.3962
8	181009_181017	68.4672
8	181016_181024	60.082
8	190921_190929_1	47.7306
8	191205_191213	55.1042
8	191212_191220	56.159
9	171211_171220	52.9926
9	190211_190220_0	65.1362
9	190305_190314	55.7836
9	190313_190322	44.5768
9	190921_190930	48.7605
10	190921_191001	40.7453
11	190921_191002	39.3153
12	171029_171110	42.6574
12	190828_190909	42.1697
12	190911_190923	42.7217
12	190921_191003	42.8309
12	191122_191204	40.2857

## Sheet: sumary
Age	Mouse ID		N_Activator	N_Neutral	N_Inhibitor	N_moves		%_Activator	%_Neutral	%_Inhibitor
5	190320_190325		213	21	5	239		89.1213	8.78661	2.09205
5	191205_191210_0		248	69	57	374		66.3102	18.4492	15.2406
5	191205_191210_1		170	78	21	269		63.197	28.9963	7.80669
5	200306_200311		329	129	179	637		51.6484	20.2512	28.1005
6	180201_180207		64	23	6	93		68.8172	24.7312	6.45161
6	190921_190927_1		246	121	71	438		56.1644	27.6256	16.21
6	191205_191211_1		144	61	42	247		58.2996	24.6964	17.004
7	180201_180208		300	235	138	673		44.5765	34.9183	20.5052
7	190226_190305		11	9	2	22		50	40.9091	9.09091
7	190320_190327		211	96	32	339		62.2419	28.3186	9.43953
7	200103_200110_0		224	228	119	571		39.2294	39.9299	20.8406
7	200206_200213		307	107	48	462		66.4502	23.1602	10.3896
8	181009_181017		101	40	5	146		69.1781	27.3973	3.42466
8	181016_181024		49	37	11	97		50.5155	38.1443	11.3402
8	190921_190929_1		39	94	62	195		20	48.2051	31.7949
8	191205_191213		93	128	39	260		35.7692	49.2308	15
8	191212_191220		158	176	73	407		38.8206	43.2432	17.9361
9	171211_171220		92	78	87	257		35.7977	30.3502	33.8521
9	190211_190220_0		229	108	32	369		62.0596	29.2683	8.67209
9	190305_190314		22	25	15	62		35.4839	40.3226	24.1935
9	190313_190322		41	65	81	187		21.9251	34.7594	43.3155
9	190921_190930		76	212	109	397		19.1436	53.4005	27.4559
10	190921_191001		11	26	46	83		13.253	31.3253	55.4217
11	190921_191002		6	18	33	57		10.5263	31.5789	57.8947
12	171029_171110		5	13	17	35		14.2857	37.1429	48.5714
12	190828_190909		16	63	72	151		10.596	41.7219	47.6821
12	190911_190923		8	47	42	97		8.24742	48.4536	43.299
12	190921_191003		4	35	26	65		6.15385	53.8462	40
12	191122_191204		9	62	74	145		6.2069	42.7586	51.0345
