# Supplementary material for: The rapid developmental rise of somatic inhibition disengages hippocampal dynamics from self-motion
Source: eLife journal article supplement (doi:10.7554/elife.78116), 2022-07-20
Supplement: supp [file by_animal_transient_frequencies_table.xlsx]

## Sheet: Sheet1
	P-Age-D	N_Cells	Weight	Frequency_description
	mean	size	mean	mean	std	min	median	max
SubjectID
171029_171110	12	1058	7	1.8141	2.21642	0	1.14032	17.5713
171211_171220	9	372	5.05	1.63663	1.4947	0	1.24398	13.8393
180201_180207	6	971	4.35	1.21164	1.22283	0	0.901123	14.6111
180201_180208	7	2725	3.85	1.26382	1.23237	0	0.992398	16.8975
181009_181017	8	1215	6	1.15051	1.07806	0	0.882168	9.50781
181016_181024	8	565	6.4	1.39086	1.25572	0	1.08849	10.833
190211_190220_0	9	2930	5.2	0.662413	1.15883	0	0.40725	16.9009
190211_190221_0	10	1535	6.55	0.67332	0.943413	0	0.405422	9.8112
190211_190222	11	606	7.95	0.712947	1.10467	0	0.443703	11.3749
190226_190305	7	410	7	0.47366	0.706502	0	0.276935	6.36951
190226_190308	10	1142	8.6	0.485918	0.857359	0	0.204737	9.0409
190305_190314	9	943	5.75	0.841957	0.793417	0	0.613993	6.63112
190313_190322	9	1540	7.1	0.591507	0.831678	0	0.409329	12.5255
190320_190325	5	1552	3.75	0.345949	0.584744	0	0.1879	10.7506
190320_190327	7	2157	4.85	0.497723	0.673883	0	0.327463	10.7244
190828_190909	12	826	9.2	2.12139	1.91976	0	1.62108	14.1034
190911_190923	12	413	5.75	2.42966	2.19116	0	1.86425	12.5229
190921_190927_1	6	240	3.75	1.56884	2.17789	0	0.939568	17.7292
190921_190929_1	8	698	5.6	1.50281	1.49249	0	1.09423	13.2524
190921_190930	9	1899	6.3	1.22969	1.24793	0	0.896301	13.0778
190921_191001	10	486	5.9	1.39768	1.54492	0	0.937041	11.7334
190921_191002	11	567	5.75	1.82256	1.43894	0	1.5456	12.7308
190921_191003	12	294	6.15	1.8667	1.7031	0	1.4661	11.9324
191122_191204	12	1432	6.8	1.72557	1.62847	0	1.21581	9.24017
191205_191210_0	5	444	3.55	2.39038	2.61269	0	1.339	14.7843
191205_191210_1	5	629	3.95	1.39185	1.26825	0	1.0537	9.42254
191205_191211_1	6	961	4.45	1.28176	1.23771	0	0.932869	9.62417
191205_191213	8	1009	4.6	1.56563	1.57543	0	1.08644	12.5229
191212_191220	8	1157	5.25	2.33516	1.86616	0	1.86425	12.3608
200103_200110_0	7	939	5.15	1.60482	1.67033	0	1.07076	12.4784
200206_200213	7	933	6.25	1.66889	1.84667	0	1.02782	16.5932
200306_200311	5	660	3.8	1.71432	1.52131	0	1.25634	12.1176
