# Supplementary material for: The rapid developmental rise of somatic inhibition disengages hippocampal dynamics from self-motion
Source: eLife journal article supplement (doi:10.7554/elife.78116), 2022-07-20
Supplement: supp [file data_and_rnd_psth_5-8_all_movesINs_all.xlsx]

## Sheet: Sheet1
	Time	Median_active_cells	Percentile_25	Percentile_75	rnd_Median_active_cells	rnd_Percentile_5	rnd_Percentile_95
0	-9940.78	2.24719	1.63934	3.57143	3.57143	0	7.35321
1	-9822.34	2.5641	1.81818	3.7037	3.57143	0	7.35321
2	-9703.9	2.22222	1.63934	2.98507	3.57143	0	7.35321
3	-9585.46	2.38095	1.66667	2.98507	3.57143	0	7.35321
4	-9467.02	2.22222	1.19048	2.7027	3.57143	0	7.35321
5	-9348.58	2.22222	0.609756	2.7027	3.57143	0	7.35321
6	-9230.14	2.22222	1.19048	2.7027	3.57143	0	7.35321
7	-9111.7	2.22222	0.925926	2.7027	3.57143	0	7.35321
8	-8993.26	2.22222	1.19048	2.94118	3.57143	0	7.35321
9	-8874.82	2.22222	1.19048	3.0303	3.57143	0	7.35321
10	-8756.39	2.12766	1.19048	2.7027	3.57143	0	7.35321
11	-8637.95	2.22222	0.925926	2.7027	3.57143	0	7.35321
12	-8519.51	2.22222	1.81818	2.98507	3.57143	0	7.35321
13	-8401.07	2.22222	1.63934	3.0303	3.57143	0	7.35321
14	-8282.63	2.24719	1.63934	3.57143	3.57143	0	7.35321
15	-8164.19	2.22222	1.06383	3.7037	3.57143	0	7.35321
16	-8045.75	2.17391	1.19048	2.7027	3.57143	0	7.35321
17	-7927.31	2.22222	1.49254	3.7037	3.57143	0	7.35321
18	-7808.87	2.17391	1.19048	3.7037	3.57143	0	7.35321
19	-7690.43	2.12766	1.19048	3.66972	3.57143	0	7.35321
20	-7571.99	2.12766	1.19048	2.67857	3.57143	0	7.35321
21	-7453.55	2.17391	1.20482	2.7027	3.57143	0	7.35321
22	-7335.11	2.12766	1.19048	2.7027	3.57143	0	7.35321
23	-7216.67	2.08333	1.14943	2.7027	3.57143	0	7.35321
24	-7098.23	2.08333	1.19048	2.98507	3.57143	0	7.35321
25	-6979.79	1.96078	0	2.67857	3.57143	0	7.35321
26	-6861.35	2.08333	1.06383	2.7027	3.57143	0	7.35321
27	-6742.91	2.17391	1.06383	2.7027	3.57143	0	7.35321
28	-6624.47	2.08333	0.757576	2.7027	3.57143	0	7.35321
29	-6506.04	2.12766	0	2.7027	3.57143	0	7.35321
30	-6387.6	1.96078	0	2.67857	3.57143	0	7.35321
31	-6269.16	2.08333	0	2.7027	3.57143	0	7.35321
32	-6150.72	2.22222	0.925926	2.7027	3.57143	0	7.35321
33	-6032.28	2.17391	0.925926	2.7027	3.57143	0	7.35321
34	-5913.84	2.17391	0	2.7027	3.57143	0	7.35321
35	-5795.4	2.22222	0.925926	2.7027	3.57143	0	7.35321
36	-5676.96	2.22222	0	2.94118	3.57143	0	7.35321
37	-5558.52	2.17391	0	2.7027	3.57143	0	7.35321
38	-5440.08	1.96078	0	2.7027	3.57143	0	7.35321
39	-5321.64	2.08333	0	2.7027	3.57143	0	7.35321
40	-5203.2	2.22222	0	2.7027	3.57143	0	7.35321
41	-5084.76	2.17391	0	2.7027	3.57143	0	7.35321
42	-4966.32	2.17391	1.06383	2.7027	3.57143	0	7.35321
43	-4847.88	2.24719	1.14943	2.75229	3.57143	0	7.35321
44	-4729.44	2.08333	0.574713	2.7027	3.57143	0	7.35321
45	-4611	2	0.925926	2.63158	3.57143	0	7.35321
46	-4492.56	2.08333	0	2.67857	3.57143	0	7.35321
47	-4374.12	2.38095	1.06383	2.75229	3.57143	0	7.35321
48	-4255.68	2.17391	1.14943	2.63158	3.57143	0	7.35321
49	-4137.25	2.22222	1.06383	2.7027	3.57143	0	7.35321
50	-4018.81	2.38095	1.06383	2.94118	3.57143	0	7.35321
51	-3900.37	2.22222	0.925926	2.7027	3.57143	0	7.35321
52	-3781.93	2.08333	0	2.7027	3.57143	0	7.35321
53	-3663.49	2.22222	0.925926	2.75229	3.57143	0	7.35321
54	-3545.05	1.85185	0	2.7027	3.57143	0	7.35321
55	-3426.61	2.22222	0	2.98507	3.57143	0	7.35321
56	-3308.17	2.12766	0	2.7027	3.57143	0	7.35321
57	-3189.73	2.22222	0	3.57143	3.57143	0	7.35321
58	-3071.29	2.22222	0	3.37079	3.57143	0	7.35321
59	-2952.85	2.08333	0	3.37079	3.57143	0	7.35321
60	-2834.41	2.12766	0.925926	2.98507	3.57143	0	7.35321
61	-2715.97	2.12766	0	2.98507	3.57143	0	7.35321
62	-2597.53	2.22222	0.925926	3.63636	3.57143	0	7.35321
63	-2479.09	2.08333	0	2.98507	3.57143	0	7.35321
64	-2360.65	2.38095	0	3.57143	3.57143	0	7.35321
65	-2242.21	2.22222	0	3.37079	3.57143	0	7.35321
66	-2123.77	2.08333	0	3.37079	3.57143	0	7.35321
67	-2005.33	1.85185	0	2.7027	3.57143	0	7.35321
68	-1886.89	2.12766	1.20482	3.92157	3.57143	0	7.35321
69	-1768.46	2.22222	1.20482	3.92157	3.57143	0	7.35321
70	-1650.02	2.17391	1.20482	3.7037	3.57143	0	7.35321
71	-1531.58	2.5641	1.20482	3.77358	3.57143	0	7.35321
72	-1413.14	2.38095	1.66667	3.7037	3.57143	0	7.35321
73	-1294.7	2.17391	1.28205	3.7037	3.57143	0	7.35321
74	-1176.26	2.12766	1.14943	3.77358	3.57143	0	7.35321
75	-1057.82	2.08333	0.641026	3.73134	3.57143	0	7.35321
76	-939.379	2.08333	1.21951	3.57143	3.57143	0	7.35321
77	-820.94	2.22222	1.14943	3.77358	3.57143	0	7.35321
78	-702.5	2.40964	1.35135	3.77358	3.57143	0	7.35321
79	-584.061	2.38095	1.14943	3.7037	3.57143	0	7.35321
80	-465.621	2.40964	1.63934	3.7037	3.57143	0	7.35321
81	-347.182	2.7027	1.28205	3.7037	3.57143	0	7.35321
82	-228.742	2.7027	1.20482	3.73134	3.57143	0	7.35321
83	-110.303	3.19149	2.17391	4.47761	3.57143	0	7.35321
84	8.13687	3.7037	2.22222	5.26316	3.57143	0	7.35321
85	126.576	5.26316	2.7027	7.14286	3.57143	0	7.35321
86	245.016	7.27273	3.7037	8.33333	3.57143	0	7.35321
87	363.455	7.40741	5	9.25926	3.57143	0	7.35321
88	481.895	7.89474	4.81928	10	3.57143	0	7.35321
89	600.334	7.89474	5.61798	11.1111	3.57143	0	7.35321
90	718.774	7.89474	4.87805	10.8108	3.57143	0	7.35321
91	837.213	7.83133	4.7619	9.45946	3.57143	0	7.35321
92	955.653	7.40741	4.7619	8.82353	3.57143	0	7.35321
93	1074.09	7.31707	4.54545	8.10811	3.57143	0	7.35321
94	1192.53	6.55738	3.63636	7.40741	3.57143	0	7.35321
95	1310.97	5.66038	3.0303	6.75676	3.57143	0	7.35321
96	1429.41	5.12821	2.98507	6.52174	3.57143	0	7.35321
97	1547.85	3.77358	2.85714	5.40541	3.57143	0	7.35321
98	1666.29	3.66972	2.38095	4.81928	3.57143	0	7.35321
99	1784.73	3.33333	2.24719	4.34783	3.57143	0	7.35321
100	1903.17	2.85714	2.17391	4	3.57143	0	7.35321
101	2021.61	3.33333	2.22222	4	3.57143	0	7.35321
102	2140.05	2.7027	1.83486	3.77358	3.57143	0	7.35321
103	2258.49	2.38095	1.63934	3.7037	3.57143	0	7.35321
104	2376.93	2.17391	1.28205	2.77778	3.57143	0	7.35321
105	2495.37	2.17391	1.1236	2.7027	3.57143	0	7.35321
106	2613.81	2.17391	1.06383	2.7027	3.57143	0	7.35321
107	2732.25	1.81818	0	2.63158	3.57143	0	7.35321
108	2850.68	1.66667	0	2.43902	3.57143	0	7.35321
109	2969.12	1.66667	0	2.43902	3.57143	0	7.35321
110	3087.56	1.66667	0	2.43902	3.57143	0	7.35321
111	3206	1.63934	0	2.43902	3.57143	0	7.35321
112	3324.44	1.63934	0	2.43902	3.57143	0	7.35321
113	3442.88	1.66667	0	2.43902	3.57143	0	7.35321
114	3561.32	1.66667	0	2.43902	3.57143	0	7.35321
115	3679.76	1.49254	0	2.43902	3.57143	0	7.35321
116	3798.2	1.66667	0	2.43902	3.57143	0	7.35321
117	3916.64	1.63934	0	2.43902	3.57143	0	7.35321
118	4035.08	1.1236	0	2.43902	3.57143	0	7.35321
119	4153.52	1.49254	0	2.63158	3.57143	0	7.35321
120	4271.96	1.63934	0	2.63158	3.57143	0	7.35321
121	4390.4	1.63934	0	2.43902	3.57143	0	7.35321
122	4508.84	1.49254	0	2.40964	3.57143	0	7.35321
123	4627.28	1.63934	0	2.43902	3.57143	0	7.35321
124	4745.72	1.63934	0	2.43902	3.57143	0	7.35321
125	4864.16	1.51515	0	2.40964	3.57143	0	7.35321
126	4982.6	1.81818	0	2.63158	3.57143	0	7.35321
127	5101.03	1.81818	0	2.43902	3.57143	0	7.35321
128	5219.47	1.66667	0	2.98507	3.57143	0	7.35321
129	5337.91	1.66667	0	2.63158	3.57143	0	7.35321
130	5456.35	1.96078	0	2.67857	3.57143	0	7.35321
131	5574.79	1.81818	0	2.67857	3.57143	0	7.35321
132	5693.23	1.66667	0	2.67857	3.57143	0	7.35321
133	5811.67	1.66667	0	2.67857	3.57143	0	7.35321
134	5930.11	1.66667	0	2.7027	3.57143	0	7.35321
135	6048.55	1.81818	0	2.7027	3.57143	0	7.35321
136	6166.99	1.66667	0	2.98507	3.57143	0	7.35321
137	6285.43	1.66667	0	2.7027	3.57143	0	7.35321
138	6403.87	1.81818	0	2.7027	3.57143	0	7.35321
139	6522.31	1.81818	0	2.7027	3.57143	0	7.35321
140	6640.75	1.96078	0.925926	2.98507	3.57143	0	7.35321
141	6759.19	1.96078	0	3.37079	3.57143	0	7.35321
142	6877.63	1.81818	0	2.98507	3.57143	0	7.35321
143	6996.07	1.80723	0	2.98507	3.57143	0	7.35321
144	7114.51	1.96078	0	3.7037	3.57143	0	7.35321
145	7232.95	1.96078	0	2.98507	3.57143	0	7.35321
146	7351.39	2	0	2.72727	3.57143	0	7.35321
147	7469.82	2.08333	0	2.94118	3.57143	0	7.35321
148	7588.26	1.96078	0	2.98507	3.57143	0	7.35321
149	7706.7	2.08333	0.925926	2.94118	3.57143	0	7.35321
150	7825.14	2.22222	0.925926	3.63636	3.57143	0	7.35321
151	7943.58	2.12766	0	2.98507	3.57143	0	7.35321
152	8062.02	2.12766	0	3.37079	3.57143	0	7.35321
153	8180.46	2.17391	0.925926	3.37079	3.57143	0	7.35321
154	8298.9	2.22222	0	3.37079	3.57143	0	7.35321
155	8417.34	2.22222	0	3.7037	3.57143	0	7.35321
156	8535.78	2.22222	0.925926	3.63636	3.57143	0	7.35321
157	8654.22	2.40964	0.925926	3.92157	3.57143	0	7.35321
158	8772.66	2.22222	0.925926	3.7037	3.57143	0	7.35321
159	8891.1	2.40964	1.51515	3.7037	3.57143	0	7.35321
160	9009.54	2.40964	0.925926	3.92157	3.57143	0	7.35321
161	9127.98	2.22222	0	3.92157	3.57143	0	7.35321
162	9246.42	2.38095	0.925926	3.63636	3.57143	0	7.35321
163	9364.86	2.22222	1.19048	4	3.57143	0	7.35321
164	9483.3	2.67857	0.925926	3.7037	3.57143	0	7.35321
165	9601.74	2.67857	0.925926	3.77358	3.57143	0	7.35321
166	9720.18	2.22222	0	3.77358	3.57143	0	7.35321
167	9838.61	2.22222	0.925926	3.77358	3.57143	0	7.35321
168	9948.92	2.22222	1.15741	3.71622	3.57143	0	7.35321
