# Supplementary material for: The rapid developmental rise of somatic inhibition disengages hippocampal dynamics from self-motion
Source: eLife journal article supplement (doi:10.7554/elife.78116), 2022-07-20
Supplement: supp [file data_and_rnd_psth_5-8_all_movesPYRs.xlsx]

## Sheet: Sheet1
	Time	Median_active_cells	Percentile_25	Percentile_75	rnd_Median_active_cells	rnd_Percentile_5	rnd_Percentile_95
0	-9940.78	0.520833	0.263158	0.853242	1.08108	0.242735	1.82573
1	-9822.34	0.519931	0.316456	0.948767	1.08108	0.242735	1.82573
2	-9703.9	0.520833	0.316456	0.996933	1.08108	0.242735	1.82573
3	-9585.46	0.519931	0.316456	1.02041	1.08108	0.242735	1.82573
4	-9467.02	0.520833	0.322581	1.02041	1.08108	0.242735	1.82573
5	-9348.58	0.520833	0.322581	1.02564	1.08108	0.242735	1.82573
6	-9230.14	0.556586	0.322581	0.920245	1.08108	0.242735	1.82573
7	-9111.7	0.549451	0.328947	0.948767	1.08108	0.242735	1.82573
8	-8993.26	0.520833	0.328947	0.766871	1.08108	0.242735	1.82573
9	-8874.82	0.519931	0.328947	0.920245	1.08108	0.242735	1.82573
10	-8756.39	0.549451	0.328947	0.920245	1.08108	0.242735	1.82573
11	-8637.95	0.567376	0.328947	0.920245	1.08108	0.242735	1.82573
12	-8519.51	0.549451	0.328947	0.920245	1.08108	0.242735	1.82573
13	-8401.07	0.520833	0.322581	0.920245	1.08108	0.242735	1.82573
14	-8282.63	0.511945	0.316456	0.920245	1.08108	0.242735	1.82573
15	-8164.19	0.520833	0.322581	0.920245	1.08108	0.242735	1.82573
16	-8045.75	0.512821	0.316456	0.792079	1.08108	0.242735	1.82573
17	-7927.31	0.519931	0.328947	0.85389	1.08108	0.242735	1.82573
18	-7808.87	0.549451	0.340136	0.792079	1.08108	0.242735	1.82573
19	-7690.43	0.549451	0.316456	0.792079	1.08108	0.242735	1.82573
20	-7571.99	0.510204	0.263158	0.594059	1.08108	0.242735	1.82573
21	-7453.55	0.496454	0.263158	0.759013	1.08108	0.242735	1.82573
22	-7335.11	0.496454	0.263158	0.765306	1.08108	0.242735	1.82573
23	-7216.67	0.519931	0.263158	0.765306	1.08108	0.242735	1.82573
24	-7098.23	0.512821	0.316456	0.765306	1.08108	0.242735	1.85877
25	-6979.79	0.49505	0.263158	0.765306	1.08108	0.242735	1.82573
26	-6861.35	0.512821	0.263158	0.784314	1.08108	0.242735	1.82573
27	-6742.91	0.519931	0.255102	0.784314	1.08108	0.242735	1.82573
28	-6624.47	0.510204	0.316456	0.784314	1.08108	0.242735	1.82573
29	-6506.04	0.519931	0.263158	0.765306	1.08108	0.242735	1.82573
30	-6387.6	0.512821	0.316456	0.784314	1.08108	0.242735	1.82573
31	-6269.16	0.490196	0.263158	0.765306	1.08108	0.242735	1.82573
32	-6150.72	0.520833	0.316456	0.877193	1.08108	0.242735	1.82573
33	-6032.28	0.519931	0.263158	0.70922	1.08108	0.242735	1.82573
34	-5913.84	0.512821	0.247525	0.693241	1.08108	0.242735	1.82573
35	-5795.4	0.510204	0.316456	0.686275	1.08108	0.242735	1.82573
36	-5676.96	0.510204	0.263158	0.618812	1.08108	0.242735	1.82573
37	-5558.52	0.49505	0.207469	0.638298	1.08108	0.242735	1.82573
38	-5440.08	0.510204	0.207469	0.70922	1.08108	0.242735	1.82573
39	-5321.64	0.490196	0.207469	0.638298	1.08108	0.242735	1.82573
40	-5203.2	0.39604	0.207469	0.588235	1.08108	0.242735	1.82573
41	-5084.76	0.490196	0.178571	0.765306	1.08108	0.242735	1.82573
42	-4966.32	0.46729	0.170068	0.686275	1.08108	0.242735	1.82573
43	-4847.88	0.490196	0.170068	0.701754	1.08108	0.242735	1.82573
44	-4729.44	0.49505	0.170068	0.700935	1.08108	0.242735	1.82573
45	-4611	0.490196	0.189753	0.700935	1.08108	0.242735	1.82573
46	-4492.56	0.490196	0.170068	0.618812	1.08108	0.242735	1.82573
47	-4374.12	0.46729	0.170068	0.70922	1.08108	0.242735	1.82573
48	-4255.68	0.49505	0.189753	0.701754	1.08108	0.242735	1.82573
49	-4137.25	0.49505	0.189753	0.70922	1.08108	0.242735	1.82573
50	-4018.81	0.49505	0.189753	0.70922	1.08108	0.242735	1.82573
51	-3900.37	0.49505	0.189753	0.784314	1.08108	0.242735	1.82573
52	-3781.93	0.49505	0.263158	0.784314	1.08108	0.242735	1.82573
53	-3663.49	0.49505	0.170068	0.784314	1.08108	0.242735	1.82573
54	-3545.05	0.510204	0.170068	0.784314	1.08108	0.242735	1.82573
55	-3426.61	0.49505	0.263158	0.784314	1.08108	0.242735	1.82573
56	-3308.17	0.519931	0.271739	0.784314	1.08108	0.242735	1.82573
57	-3189.73	0.519931	0.263158	0.765306	1.08108	0.242735	1.82573
58	-3071.29	0.518672	0.263158	0.792079	1.08108	0.242735	1.82573
59	-2952.85	0.519931	0.263158	0.792079	1.08108	0.242735	1.82573
60	-2834.41	0.556586	0.271739	0.824176	1.08108	0.242735	1.82573
61	-2715.97	0.49505	0.170068	0.784314	1.08108	0.242735	1.82573
62	-2597.53	0.519931	0.263158	0.784314	1.08108	0.242735	1.82573
63	-2479.09	0.594059	0.263158	0.986842	1.08108	0.242735	1.82573
64	-2360.65	0.56926	0.278293	1.02041	1.08108	0.242735	1.82573
65	-2242.21	0.594059	0.357143	1.16959	1.08108	0.242735	1.82573
66	-2123.77	0.594059	0.322581	1.05263	1.08108	0.242735	1.82573
67	-2005.33	0.588235	0.316456	1.22699	1.08108	0.242735	1.82573
68	-1886.89	0.540541	0.357143	1.16959	1.08108	0.242735	1.82573
69	-1768.46	0.56926	0.357143	1.05263	1.08108	0.242735	1.82573
70	-1650.02	0.540541	0.357143	1.14796	1.08108	0.242735	1.82573
71	-1531.58	0.540541	0.357143	1.16959	1.08108	0.242735	1.82573
72	-1413.14	0.594059	0.357143	1.22699	1.08108	0.242735	1.82573
73	-1294.7	0.567376	0.357143	1.22699	1.08108	0.242735	1.82573
74	-1176.26	0.682594	0.322581	1.16959	1.08108	0.242735	1.82573
75	-1057.82	0.674274	0.357143	1.0989	1.08108	0.242735	1.82573
76	-939.379	0.540541	0.316456	1.11386	1.08108	0.242735	1.82573
77	-820.94	0.567376	0.357143	1.16959	1.08108	0.242735	1.82573
78	-702.5	0.673759	0.322581	1.11386	1.08108	0.242735	1.82573
79	-584.061	0.622407	0.316456	1.22807	1.08108	0.242735	1.82573
80	-465.621	0.638298	0.322581	1.22699	1.08108	0.242735	1.82573
81	-347.182	0.567376	0.316456	1.22699	1.08108	0.242735	1.85877
82	-228.742	0.622407	0.322581	1.22699	1.08108	0.242735	1.82573
83	-110.303	0.638298	0.371058	1.40351	1.08108	0.242735	1.82573
84	8.13687	0.784314	0.463822	1.57895	1.08108	0.242735	1.82573
85	126.576	1.04167	0.556586	1.85185	1.08108	0.242735	1.82573
86	245.016	1.44737	0.767918	2.10526	1.08108	0.242735	1.82573
87	363.455	1.78571	0.927644	2.45614	1.08108	0.242735	1.82573
88	481.895	1.9802	1.03986	3.21637	1.08108	0.242735	1.82573
89	600.334	2.14724	1.42157	3.50877	1.08108	0.242735	1.82573
90	718.774	2.04778	1.49031	3.58974	1.08108	0.242735	1.82573
91	837.213	1.9802	1.21317	3.57143	1.08108	0.242735	1.82573
92	955.653	1.85185	1.21317	3.21429	1.08108	0.242735	1.82573
93	1074.09	1.76252	1.12652	2.80612	1.08108	0.242735	1.82573
94	1192.53	1.53374	0.949367	2.5641	1.08108	0.242735	1.82573
95	1310.97	1.38037	0.806452	2.05128	1.08108	0.242735	1.82573
96	1429.41	1.38037	0.666667	2.04082	1.08108	0.242735	1.82573
97	1547.85	1.07362	0.645161	1.78571	1.08108	0.242735	1.82573
98	1666.29	0.934579	0.543478	1.78571	1.08108	0.242735	1.82573
99	1784.73	0.920245	0.474684	1.42857	1.08108	0.242735	1.82573
100	1903.17	0.759013	0.444444	1.07843	1.08108	0.242735	1.82573
101	2021.61	0.56926	0.388889	1.02041	1.08108	0.242735	1.82573
102	2140.05	0.520833	0.34662	0.927644	1.08108	0.242735	1.82573
103	2258.49	0.510204	0.332068	0.882353	1.08108	0.242735	1.82573
104	2376.93	0.49505	0.271739	0.784314	1.08108	0.242735	1.82573
105	2495.37	0.510204	0.25641	0.70922	1.08108	0.242735	1.82573
106	2613.81	0.460123	0.233645	0.70922	1.08108	0.242735	1.82573
107	2732.25	0.372578	0.207469	0.686275	1.08108	0.242735	1.82573
108	2850.68	0.322581	0.128205	0.588235	1.08108	0.242735	1.82573
109	2969.12	0.361664	0.158228	0.588235	1.08108	0.242735	1.82573
110	3087.56	0.340136	0.128205	0.613497	1.08108	0.242735	1.82573
111	3206	0.328947	0.158228	0.567376	1.08108	0.242735	1.82573
112	3324.44	0.340136	0.111111	0.588235	1.08108	0.242735	1.82573
113	3442.88	0.340136	0.111111	0.588235	1.08108	0.242735	1.82573
114	3561.32	0.328947	0.111111	0.520833	1.08108	0.242735	1.82573
115	3679.76	0.350877	0.128205	0.512821	1.08108	0.242735	1.82573
116	3798.2	0.350877	0.111111	0.567376	1.08108	0.242735	1.82573
117	3916.64	0.350877	0.16129	0.512821	1.08108	0.242735	1.82573
118	4035.08	0.350877	0.16129	0.512821	1.08108	0.242735	1.82573
119	4153.52	0.350877	0.16129	0.520833	1.08108	0.242735	1.82573
120	4271.96	0.371058	0.111111	0.520833	1.08108	0.242735	1.82573
121	4390.4	0.371058	0.16129	0.526316	1.08108	0.242735	1.82573
122	4508.84	0.350877	0.16129	0.520833	1.08108	0.242735	1.82573
123	4627.28	0.371058	0.16129	0.520833	1.08108	0.242735	1.82573
124	4745.72	0.350877	0.16129	0.520833	1.08108	0.242735	1.82573
125	4864.16	0.328947	0.16129	0.526316	1.08108	0.242735	1.82573
126	4982.6	0.328947	0.16129	0.567376	1.08108	0.242735	1.82573
127	5101.03	0.278293	0.16129	0.701754	1.08108	0.242735	1.82573
128	5219.47	0.392157	0.158228	0.693069	1.08108	0.242735	1.82573
129	5337.91	0.490196	0.16129	0.701754	1.08108	0.242735	1.82573
130	5456.35	0.357143	0.16129	0.701754	1.08108	0.242735	1.82573
131	5574.79	0.392157	0.16129	0.700935	1.08108	0.242735	1.82573
132	5693.23	0.371287	0.16129	0.701754	1.08108	0.242735	1.82573
133	5811.67	0.371287	0.207469	0.700935	1.08108	0.242735	1.82573
134	5930.11	0.357143	0.189753	0.701754	1.08108	0.242735	1.82573
135	6048.55	0.371287	0.207469	0.701754	1.08108	0.242735	1.82573
136	6166.99	0.371287	0.247525	0.701754	1.08108	0.242735	1.82573
137	6285.43	0.414938	0.170068	0.701754	1.08108	0.242735	1.82573
138	6403.87	0.490196	0.170068	0.851064	1.08108	0.242735	1.82573
139	6522.31	0.371058	0.16129	0.780142	1.08108	0.242735	1.82573
140	6640.75	0.371058	0.16129	0.766871	1.08108	0.242735	1.82573
141	6759.19	0.392157	0.16129	0.765306	1.08108	0.242735	1.82573
142	6877.63	0.371058	0.16129	0.70922	1.08108	0.242735	1.82573
143	6996.07	0.511945	0.16129	0.765306	1.08108	0.242735	1.82573
144	7114.51	0.49505	0.16129	0.765306	1.08108	0.242735	1.82573
145	7232.95	0.49505	0.170068	0.765306	1.08108	0.242735	1.82573
146	7351.39	0.49505	0.207469	0.766871	1.08108	0.242735	1.82573
147	7469.82	0.49505	0.207469	0.766871	1.08108	0.242735	1.82573
148	7588.26	0.371058	0.170068	0.877193	1.08108	0.242735	1.82573
149	7706.7	0.490196	0.170068	0.877193	1.08108	0.242735	1.82573
150	7825.14	0.49505	0.263158	0.792079	1.08108	0.242735	1.82573
151	7943.58	0.511945	0.189753	0.843558	1.08108	0.242735	1.82573
152	8062.02	0.511945	0.316456	0.824176	1.08108	0.242735	1.82573
153	8180.46	0.49505	0.316456	0.843558	1.08108	0.242735	1.82573
154	8298.9	0.520833	0.322581	0.824176	1.08108	0.242735	1.82573
155	8417.34	0.511945	0.189753	0.792079	1.08108	0.242735	1.82573
156	8535.78	0.511945	0.189753	0.891089	1.08108	0.242735	1.82573
157	8654.22	0.520833	0.316456	0.980392	1.08108	0.242735	1.82573
158	8772.66	0.520833	0.316456	1.05263	1.08108	0.242735	1.82573
159	8891.1	0.520833	0.263158	1.05263	1.08108	0.242735	1.82573
160	9009.54	0.556586	0.322581	1.02041	1.08108	0.242735	1.82573
161	9127.98	0.520833	0.316456	1.02104	1.08108	0.242735	1.82573
162	9246.42	0.556586	0.263158	1.02041	1.08108	0.242735	1.82573
163	9364.86	0.556586	0.207469	1.05263	1.08108	0.242735	1.82573
164	9483.3	0.567376	0.316456	1.07362	1.08108	0.242735	1.82573
165	9601.74	0.567376	0.328947	1.05263	1.08108	0.242735	1.82573
166	9720.18	0.526316	0.322581	1.07362	1.08108	0.242735	1.82573
167	9838.61	0.520833	0.316456	1.05263	1.08108	0.242735	1.82573
168	9948.92	0.556931	0.316456	1.0523	1.08108	0.242735	1.82573
