# Supplementary material for: The rapid developmental rise of somatic inhibition disengages hippocampal dynamics from self-motion
Source: eLife journal article supplement (doi:10.7554/elife.78116), 2022-07-20
Supplement: supp [file data_and_rnd_psth_9-10_all_moves_no_cell_type_groups_.xlsx]

## Sheet: Sheet1
	Time	Median_active_cells	Percentile_25	Percentile_75	rnd_Median_active_cells	rnd_Percentile_5	rnd_Percentile_95
0	-9901.48	0.0663841	0.0353288	0.0898286	0.112009	0.0473529	0.268795
1	-9704.43	0.0270034	0.0242015	0.0642442	0.111813	0.0475851	0.269255
2	-9507.39	0.0344514	0.0129055	0.0577471	0.112469	0.0477182	0.26924
3	-9310.35	0.0156367	-0.0011217	0.0357485	0.112859	0.0475071	0.269056
4	-9113.3	0.0141061	0.0106905	0.0439004	0.112621	0.0476273	0.26971
5	-8916.26	0.0177149	0.0139763	0.0570635	0.112325	0.0474186	0.269183
6	-8719.22	0.0228689	0.00559597	0.037922	0.111847	0.0473169	0.269113
7	-8522.17	0.0230415	0.0215843	0.0417517	0.113403	0.0475929	0.269395
8	-8325.13	0.0295703	0.0144074	0.0435224	0.112698	0.0476017	0.26932
9	-8128.09	0.0540463	0.0319176	0.0544072	0.113319	0.0477602	0.26958
10	-7931.04	0.0333695	0.0229861	0.0599363	0.11318	0.0475019	0.269074
11	-7734	0.0453597	0.0234143	0.0619986	0.111926	0.0474157	0.268748
12	-7536.96	0.00161167	-0.000621299	0.0547388	0.111967	0.0475769	0.268824
13	-7339.91	0.00649702	-0.00124723	0.0406941	0.111919	0.0471891	0.269437
14	-7142.87	0.0351751	0.0176093	0.0750066	0.112416	0.0475597	0.269455
15	-6945.82	0.0322271	0.0158664	0.0761229	0.112451	0.0476647	0.269668
16	-6748.78	0.0392281	0.0308458	0.0846983	0.112222	0.0474794	0.269157
17	-6551.74	0.0440353	0.0288335	0.100438	0.112147	0.0474921	0.268951
18	-6354.69	0.0510031	0.0238459	0.0964507	0.111441	0.047448	0.268805
19	-6157.65	0.0531471	0.0177496	0.094774	0.112883	0.0476526	0.268734
20	-5960.61	0.0656767	0.0239514	0.0968996	0.111453	0.0475667	0.26844
21	-5763.56	0.094638	0.0400703	0.114663	0.112086	0.0473833	0.268322
22	-5566.52	0.0775279	0.0354557	0.0976347	0.111775	0.0474639	0.267882
23	-5369.48	0.0762983	0.0440997	0.0943011	0.112709	0.0475101	0.268273
24	-5172.43	0.0885056	0.0466348	0.103491	0.111977	0.0474121	0.268449
25	-4975.39	0.0603811	0.0327842	0.0945273	0.111534	0.0473056	0.268846
26	-4778.35	0.0581803	0.0297636	0.0738671	0.111972	0.0476913	0.268278
27	-4581.3	0.0151978	0.0114334	0.044189	0.112396	0.0475884	0.267714
28	-4384.26	0.047776	0.0289833	0.0667949	0.112538	0.0475126	0.268179
29	-4187.22	0.0433524	0.0325864	0.0628751	0.112317	0.0474535	0.268795
30	-3990.17	0.0809456	0.0556635	0.0904596	0.112609	0.0473334	0.268498
31	-3793.13	0.132853	0.0782811	0.137116	0.112405	0.0474596	0.268148
32	-3596.08	0.136881	0.0743691	0.141086	0.111918	0.04729	0.268984
33	-3399.04	0.143758	0.0836097	0.149388	0.11202	0.0476638	0.268895
34	-3202	0.164865	0.102247	0.197892	0.111677	0.0476094	0.268394
35	-3004.95	0.17587	0.105571	0.2173	0.11186	0.047475	0.269049
36	-2807.91	0.174055	0.105242	0.220481	0.111626	0.0475722	0.267732
37	-2610.87	0.153692	0.0953149	0.186489	0.1131	0.0479189	0.268956
38	-2413.82	0.217021	0.133895	0.217743	0.111871	0.0477737	0.26811
39	-2216.78	0.190385	0.110365	0.207801	0.111937	0.0478363	0.268788
40	-2019.74	0.142779	0.0808484	0.205631	0.111515	0.0475618	0.268735
41	-1822.69	0.152223	0.0925202	0.221055	0.112213	0.0480936	0.269058
42	-1625.65	0.156312	0.0984575	0.280398	0.111609	0.0477673	0.268565
43	-1428.61	0.191805	0.121168	0.276026	0.112167	0.0477656	0.26835
44	-1231.56	0.184201	0.116149	0.248219	0.111922	0.047594	0.268419
45	-1034.52	0.208425	0.134952	0.250382	0.112436	0.0478855	0.268233
46	-837.475	0.206956	0.134728	0.283002	0.112401	0.0475401	0.268384
47	-640.431	0.25212	0.160736	0.304196	0.112583	0.0480383	0.268663
48	-443.387	0.290008	0.180437	0.321256	0.112409	0.0476387	0.269093
49	-246.344	0.298089	0.17197	0.327164	0.112737	0.0477988	0.26758
50	-49.3004	0.292626	0.175227	0.296356	0.113058	0.0477778	0.268613
51	147.743	0.279349	0.176673	0.304605	0.111655	0.0476098	0.268272
52	344.787	0.364832	0.24386	0.431424	0.112172	0.0474765	0.269191
53	541.83	0.397975	0.268484	0.52232	0.112493	0.047758	0.268668
54	738.874	0.421254	0.289664	0.551318	0.112793	0.0477372	0.269075
55	935.917	0.404553	0.276371	0.542611	0.112643	0.047772	0.26873
56	1132.96	0.395845	0.271731	0.520381	0.113087	0.0476849	0.268493
57	1330	0.376184	0.249967	0.474707	0.112829	0.0476999	0.268975
58	1527.05	0.319841	0.217301	0.401953	0.11307	0.0477374	0.268815
59	1724.09	0.277663	0.171195	0.32569	0.112344	0.047248	0.269246
60	1921.14	0.245782	0.139367	0.261272	0.112665	0.0475795	0.268758
61	2118.18	0.208106	0.111443	0.208479	0.112706	0.0473895	0.268715
62	2315.22	0.1273	0.0604802	0.133069	0.112662	0.0476874	0.269663
63	2512.27	0.0595498	0.0158264	0.0822241	0.112258	0.0476455	0.269135
64	2709.31	0.016561	-0.0172527	0.055061	0.112208	0.0475791	0.268856
65	2906.35	0.000393771	-0.0394117	0.0245019	0.112014	0.0476291	0.268849
66	3103.4	-0.0562471	-0.0735267	-0.0214492	0.112182	0.0476937	0.269253
67	3300.44	-0.089104	-0.0891942	-0.0690117	0.112161	0.0475726	0.269296
68	3497.48	-0.0778337	-0.0856968	-0.0748899	0.111751	0.0477941	0.269097
69	3694.53	-0.0860827	-0.0925933	-0.0740575	0.112268	0.0476699	0.26985
70	3891.57	-0.0983004	-0.0992224	-0.0724129	0.112587	0.0477249	0.269799
71	4088.61	-0.0954731	-0.113001	-0.0533021	0.112368	0.0477348	0.269505
72	4285.66	-0.090408	-0.118337	-0.0608621	0.112834	0.0476226	0.269477
73	4482.7	-0.0836253	-0.113628	-0.0506107	0.112647	0.0476573	0.2693
74	4679.75	-0.100289	-0.114338	-0.0533427	0.112723	0.0477556	0.269253
75	4876.79	-0.092513	-0.115807	-0.034103	0.112662	0.0478259	0.269317
76	5073.83	-0.0931787	-0.134498	-0.0255056	0.111912	0.0477962	0.269415
77	5270.88	-0.0977758	-0.129903	-0.0192812	0.11264	0.0479608	0.269797
78	5467.92	-0.0868257	-0.127564	-0.0092441	0.111631	0.0478863	0.269865
79	5664.96	-0.0569954	-0.107947	-0.0129984	0.111229	0.0476001	0.268814
80	5862.01	-0.0580081	-0.117269	0.000630857	0.112298	0.0477913	0.269325
81	6059.05	-0.051739	-0.109422	0.0185898	0.112203	0.047961	0.268829
82	6256.09	-0.0459708	-0.101042	0.00915348	0.111949	0.0478738	0.268715
83	6453.14	-0.0595364	-0.109844	-0.0012903	0.111974	0.0481199	0.268263
84	6650.18	-0.0394051	-0.107658	0.00724144	0.112114	0.0480938	0.268645
85	6847.22	-0.0272773	-0.101301	0.0322793	0.112151	0.0481715	0.268177
86	7044.27	-0.00165163	-0.0807706	0.0520788	0.112804	0.0480914	0.268439
87	7241.31	-0.000524489	-0.0778824	0.0452327	0.112411	0.0480823	0.268752
88	7438.35	0.00904928	-0.075669	0.0542951	0.112615	0.047744	0.268538
89	7635.4	0.00526329	-0.0735425	0.0491113	0.11209	0.0479935	0.269034
90	7832.44	0.0174909	-0.0672201	0.0668941	0.112197	0.0475193	0.268185
91	8029.49	0.0157204	-0.0609013	0.0547236	0.111625	0.0474676	0.268584
92	8226.53	0.016594	-0.0504548	0.07089	0.112108	0.0478998	0.268711
93	8423.57	0.0133168	-0.0583265	0.0585887	0.112439	0.0476778	0.268259
94	8620.62	0.0128705	-0.0406955	0.0837776	0.112165	0.0478105	0.268984
95	8817.66	0.0293235	-0.0300161	0.10466	0.112663	0.047925	0.268316
96	9014.7	0.0196048	-0.0292764	0.101557	0.111185	0.0476128	0.268351
97	9211.75	0.0147199	-0.0197528	0.0838162	0.112743	0.0479903	0.268714
98	9408.79	0.0189401	-0.0184548	0.0945758	0.111629	0.0474635	0.267984
99	9605.83	0.0211234	-0.0153752	0.0917965	0.111693	0.0477328	0.268203
100	9802.88	0.0271727	0.00674025	0.0870251	0.112354	0.0476829	0.267954
101	9950.7	0.0269458	0.0255542	0.0635893	0.112055	0.0474787	0.268818
