# Supplementary material for: The rapid developmental rise of somatic inhibition disengages hippocampal dynamics from self-motion
Source: eLife journal article supplement (doi:10.7554/elife.78116), 2022-07-20
Supplement: supp [file data_and_rnd_psth_10-12_all_movesINs_all.xlsx]

## Sheet: Sheet1
	Time	Median_active_cells	Percentile_25	Percentile_75	rnd_Median_active_cells	rnd_Percentile_5	rnd_Percentile_95
0	-9940.78	3.92157	3.7037	4.7619	4.7619	3.35593	7.11111
1	-9822.34	3.92157	3.7037	6.32911	4.7619	3.35593	7.11111
2	-9703.9	3.92157	3.7037	4.7619	4.7619	3.35593	7.11111
3	-9585.46	4	2.54237	5.6962	4.7619	3.35593	7.11111
4	-9467.02	4	3.33333	6.66667	4.7619	3.35593	7.11111
5	-9348.58	4	3.84615	5.06329	4.7619	3.35593	7.11111
6	-9230.14	4.7619	3.84615	5.06329	4.7619	3.35593	7.11111
7	-9111.7	3.92157	3.7037	5.06329	4.7619	3.35593	7.11111
8	-8993.26	4.7619	3.84615	5.06329	4.7619	3.35593	7.11111
9	-8874.82	4.7619	3.84615	5.06329	4.7619	3.35593	7.11111
10	-8756.39	3.92157	3.7037	5.06329	4.7619	3.35593	7.11111
11	-8637.95	3.92157	3.7037	5	4.7619	3.35593	7.11111
12	-8519.51	3.92157	3.7037	5	4.7619	3.35593	7.11111
13	-8401.07	4.7619	3.38983	6.32911	4.7619	3.35593	7.11111
14	-8282.63	4.7619	3.38983	5.06329	4.7619	3.35593	7.11111
15	-8164.19	5	3.38983	6.66667	4.7619	3.35593	7.11111
16	-8045.75	5	3.38983	6.66667	4.7619	3.35593	7.11111
17	-7927.31	5	3.84615	5.95238	4.7619	3.35593	7.11111
18	-7808.87	4.7619	3.84615	5.06329	4.7619	3.35593	7.11111
19	-7690.43	3.92157	3.38983	5	4.7619	3.35593	7.11111
20	-7571.99	3.92157	1.92308	5.6962	4.7619	3.35593	7.11111
21	-7453.55	3.92157	1.92308	6	4.7619	3.35593	7.11111
22	-7335.11	3.92157	1.92308	6	4.7619	3.35593	7.11111
23	-7216.67	3.92157	3.33333	6	4.7619	3.35593	7.11111
24	-7098.23	3.92157	3.33333	5	4.7619	3.35593	7.11111
25	-6979.79	3.92157	3.33333	5.5	4.7619	3.35593	7.11111
26	-6861.35	4.7619	3.33333	6	4.7619	3.35593	7.11111
27	-6742.91	3.7037	3.33333	5	4.7619	3.35593	7.11111
28	-6624.47	3.7037	3.33333	4.7619	4.7619	3.35593	7.11111
29	-6506.04	3.92157	3.38983	5	4.7619	3.35593	7.11111
30	-6387.6	3.92157	3.33333	5	4.7619	3.35593	7.11111
31	-6269.16	3.38983	2.38095	3.92157	4.7619	3.35593	7.11111
32	-6150.72	3.7037	3.33333	4.5	4.7619	3.35593	7.11111
33	-6032.28	3.7037	3.33333	4	4.7619	3.35593	7.11111
34	-5913.84	3.7037	3.33333	4.5	4.7619	3.35593	7.11111
35	-5795.4	3.7037	1.92308	4.7619	4.7619	3.35593	7.11111
36	-5676.96	3.7037	1.92308	4.7619	4.7619	3.35593	7.11111
37	-5558.52	3.7037	1.92308	5	4.7619	3.35593	7.11111
38	-5440.08	3.7037	1.92308	4.7619	4.7619	3.35593	7.11111
39	-5321.64	3.7037	1.92308	4	4.7619	3.35593	7.11111
40	-5203.2	3.92157	1.92308	4.7619	4.7619	3.35593	7.11111
41	-5084.76	3.92157	2.54237	5	4.7619	3.35593	7.11111
42	-4966.32	3.7037	3.33333	4	4.7619	3.35593	7.11111
43	-4847.88	3.7037	2.54237	4.7619	4.7619	3.35593	7.11111
44	-4729.44	3.84615	3.38983	4.7619	4.7619	3.35593	7.11111
45	-4611	3.7037	3.33333	4.7619	4.7619	3.35593	7.11111
46	-4492.56	3.92157	3.38983	4.7619	4.7619	3.35593	7.11111
47	-4374.12	3.7037	3.33333	4	4.7619	3.35593	7.11111
48	-4255.68	3.7037	3.33333	4	4.7619	3.35593	7.11111
49	-4137.25	3.7037	3.33333	4	4.7619	3.35593	7.11111
50	-4018.81	3.92157	1.92308	4.7619	4.7619	3.35593	7.11111
51	-3900.37	3.7037	1.92308	4	4.7619	3.35593	7.11111
52	-3781.93	4	3.38983	5.06329	4.7619	3.35593	7.11111
53	-3663.49	3.92157	3.38983	4.7619	4.7619	3.35593	7.11111
54	-3545.05	3.92157	3.38983	4.7619	4.7619	3.35593	7.11111
55	-3426.61	3.92157	3.38983	4.7619	4.7619	3.35593	7.11111
56	-3308.17	4	3.38983	5.06329	4.7619	3.35593	7.11111
57	-3189.73	4	3.38983	6.32911	4.7619	3.35593	7.11111
58	-3071.29	4	3.38983	5.6962	4.7619	3.35593	7.11111
59	-2952.85	4	3.38983	6.66667	4.7619	3.35593	7.11111
60	-2834.41	4	3.38983	5.06329	4.7619	3.35593	7.11111
61	-2715.97	4	3.38983	5.06329	4.7619	3.35593	7.11111
62	-2597.53	5	3.38983	5.88235	4.7619	3.35593	7.11111
63	-2479.09	4.7619	3.92157	6.32911	4.7619	3.35593	7.11111
64	-2360.65	5	3.38983	5.88235	4.7619	3.35593	7.11111
65	-2242.21	4.7619	3.38983	5.88235	4.7619	3.35593	7.11111
66	-2123.77	4.7619	3.38983	5.88235	4.7619	3.35593	7.11111
67	-2005.33	3.92157	3.38983	4.7619	4.7619	3.35593	7.11111
68	-1886.89	3.92157	3.38983	5	4.7619	3.35593	7.11111
69	-1768.46	4.7619	3.84615	5.06329	4.7619	3.35593	7.11111
70	-1650.02	4.7619	3.84615	5.06329	4.7619	3.35593	7.11111
71	-1531.58	4.7619	3.84615	5.06329	4.7619	3.35593	7.11111
72	-1413.14	5	3.84615	5.88235	4.7619	3.35593	7.11111
73	-1294.7	5	3.84615	6.32911	4.7619	3.35593	7.11111
74	-1176.26	5	3.84615	6.32911	4.7619	3.35593	7.11111
75	-1057.82	5	3.84615	6.66667	4.7619	3.35593	7.11111
76	-939.379	5	3.38983	6.32911	4.7619	3.35593	7.11111
77	-820.94	5	3.84615	6.32911	4.7619	3.35593	7.11111
78	-702.5	5.88235	3.84615	6.32911	4.7619	3.35593	7.11111
79	-584.061	5.5	3.84615	6.96203	4.7619	3.35593	7.11111
80	-465.621	5.88235	3.84615	6.32911	4.7619	3.35593	7.11111
81	-347.182	6	3.84615	7.14286	4.7619	3.35593	7.11111
82	-228.742	4.7619	3.84615	5.08475	4.7619	3.35593	7.11111
83	-110.303	6	5.76923	7.40741	4.7619	3.35593	7.11111
84	8.13687	7.40741	6	8.86076	4.7619	3.35593	7.11111
85	126.576	8.33333	6.77966	10	4.7619	3.35593	7.11111
86	245.016	7.62712	7.14286	10.1266	4.7619	3.35593	7.11111
87	363.455	10	7	11.3924	4.7619	3.35593	7.11111
88	481.895	10	7	11.3924	4.7619	3.35593	7.11111
89	600.334	9.52381	8	11.1111	4.7619	3.35593	7.11111
90	718.774	9.52381	6.66667	11.5385	4.7619	3.35593	7.11111
91	837.213	7.69231	6.66667	10.7595	4.7619	3.35593	7.11111
92	955.653	7.69231	5.88235	9.52381	4.7619	3.35593	7.11111
93	1074.09	6	5.76923	9.52381	4.7619	3.35593	7.11111
94	1192.53	6	5.76923	9.52381	4.7619	3.35593	7.11111
95	1310.97	6	3.84615	8.86076	4.7619	3.35593	7.11111
96	1429.41	5	3.84615	6.66667	4.7619	3.35593	7.11111
97	1547.85	5	3.33333	7.14286	4.7619	3.35593	7.11111
98	1666.29	3.92157	1.92308	5	4.7619	3.35593	7.11111
99	1784.73	3.92157	1.92308	5	4.7619	3.35593	7.11111
100	1903.17	3.92157	1.92308	5	4.7619	3.35593	7.11111
101	2021.61	3.92157	1.92308	5	4.7619	3.35593	7.11111
102	2140.05	3.92157	1.92308	4.7619	4.7619	3.35593	7.11111
103	2258.49	3.92157	1.69492	4.7619	4.7619	3.35593	7.11111
104	2376.93	3.92157	1.69492	4.7619	4.7619	3.35593	7.11111
105	2495.37	3.33333	1.69492	4.43038	4.7619	3.35593	7.11111
106	2613.81	3.92157	1.66667	4.43038	4.7619	3.35593	7.11111
107	2732.25	3.33333	1.69492	3.92157	4.7619	3.35593	7.11111
108	2850.68	3.33333	1.66667	3.79747	4.7619	3.35593	7.11111
109	2969.12	3.33333	1.69492	3.92157	4.7619	3.35593	7.11111
110	3087.56	3.33333	1.66667	3.92157	4.7619	3.35593	7.11111
111	3206	3.7037	1.66667	4	4.7619	3.35593	7.11111
112	3324.44	3.92157	1.66667	6.32911	4.7619	3.35593	7.11111
113	3442.88	3.7037	3.33333	4	4.7619	3.35593	7.11111
114	3561.32	3.7037	3.33333	3.92157	4.7619	3.35593	7.11111
115	3679.76	3.7037	3.33333	3.92157	4.7619	3.35593	7.11111
116	3798.2	3.7037	3.33333	3.92157	4.7619	3.35593	7.11111
117	3916.64	3.7037	1.92308	4	4.7619	3.35593	7.11111
118	4035.08	3.7037	3.33333	4	4.7619	3.35593	7.11111
119	4153.52	3.7037	1.92308	4	4.7619	3.35593	7.11111
120	4271.96	3.7037	3.33333	4	4.7619	3.35593	7.11111
121	4390.4	3.7037	3.33333	4	4.7619	3.35593	7.11111
122	4508.84	3.7037	3.33333	4	4.7619	3.35593	7.11111
123	4627.28	3.7037	3.33333	4.5	4.7619	3.35593	7.11111
124	4745.72	3.7037	3.33333	3.92157	4.7619	3.35593	7.11111
125	4864.16	3.7037	3.33333	4	4.7619	3.35593	7.11111
126	4982.6	3.79747	3.38983	4	4.7619	3.35593	7.11111
127	5101.03	4	3.7037	5.06329	4.7619	3.35593	7.11111
128	5219.47	3.79747	3.38983	4.5	4.7619	3.35593	7.11111
129	5337.91	3.92157	3.38983	5	4.7619	3.35593	7.11111
130	5456.35	3.92157	3.38983	5	4.7619	3.35593	7.11111
131	5574.79	3.92157	3.38983	4.7619	4.7619	3.35593	7.11111
132	5693.23	3.92157	3.38983	5	4.7619	3.35593	7.11111
133	5811.67	4.43038	3.38983	5	4.7619	3.35593	7.11111
134	5930.11	3.92157	3.38983	5	4.7619	3.35593	7.11111
135	6048.55	3.92157	3.7037	4.7619	4.7619	3.35593	7.11111
136	6166.99	3.84615	3.7037	4.5	4.7619	3.35593	7.11111
137	6285.43	3.92157	3.7037	4.7619	4.7619	3.35593	7.11111
138	6403.87	3.84615	3.7037	4	4.7619	3.35593	7.11111
139	6522.31	3.92157	3.79747	4.7619	4.7619	3.35593	7.11111
140	6640.75	3.92157	3.79747	4.7619	4.7619	3.35593	7.11111
141	6759.19	3.84615	3.7037	4.5	4.7619	3.35593	7.11111
142	6877.63	3.84615	3.7037	4	4.7619	3.35593	7.11111
143	6996.07	3.84615	3.7037	4	4.7619	3.35593	7.11111
144	7114.51	3.84615	3.7037	4	4.7619	3.35593	7.11111
145	7232.95	3.84615	3.7037	4	4.7619	3.35593	7.11111
146	7351.39	3.84615	3.7037	4	4.7619	3.35593	7.11111
147	7469.82	3.84615	3.7037	4	4.7619	3.35593	7.11111
148	7588.26	3.84615	3.7037	4	4.7619	3.35593	7.11111
149	7706.7	3.84615	3.7037	4	4.7619	3.35593	7.11111
150	7825.14	3.92157	3.79747	5.95238	4.7619	3.35593	7.11111
151	7943.58	3.84615	3	4.7619	4.7619	3.35593	7.11111
152	8062.02	4	3.84615	5.06329	4.7619	3.35593	7.11111
153	8180.46	4.7619	3.84615	5.88235	4.7619	3.35593	7.11111
154	8298.9	4	3.84615	5.6962	4.7619	3.35593	7.11111
155	8417.34	4	3.84615	6.32911	4.7619	3.35593	7.11111
156	8535.78	3.84615	3.38983	4	4.7619	3.35593	7.11111
157	8654.22	3.92157	3.7037	5	4.7619	3.35593	7.11111
158	8772.66	3.92157	3.7037	4.7619	4.7619	3.35593	7.11111
159	8891.1	3.92157	3.7037	4.7619	4.7619	3.35593	7.11111
160	9009.54	3.92157	3.7037	4.7619	4.7619	3.35593	7.11111
161	9127.98	4	3.84615	6.32911	4.7619	3.35593	7.11111
162	9246.42	4.7619	3.92157	6.32911	4.7619	3.35593	7.11111
163	9364.86	4	3.84615	6.66667	4.7619	3.35593	7.11111
164	9483.3	4	3.84615	5.06329	4.7619	3.35593	7.11111
165	9601.74	4	3.38983	5.06329	4.7619	3.35593	7.11111
166	9720.18	4	3.38983	6.66667	4.7619	3.35593	7.11111
167	9838.61	4	1.92308	5.06329	4.7619	3.35593	7.11111
168	9948.92	4.25	3.84615	5.06329	4.7619	3.35593	7.11111
