# Supplementary material for: The rapid developmental rise of somatic inhibition disengages hippocampal dynamics from self-motion
Source: eLife journal article supplement (doi:10.7554/elife.78116), 2022-07-20
Supplement: supp [file data_and_rnd_psth_10-12_all_movesPYRs.xlsx]

## Sheet: Sheet1
	Time	Median_active_cells	Percentile_25	Percentile_75	rnd_Median_active_cells	rnd_Percentile_5	rnd_Percentile_95
0	-9940.78	1.30548	1.09091	1.44928	1.37795	1.06209	1.94892
1	-9822.34	1.28205	1.09091	1.48883	1.37795	1.06209	1.94892
2	-9703.9	1.28023	1.09091	1.48883	1.37795	1.06209	1.94892
3	-9585.46	1.28205	0.984252	1.48883	1.37795	1.06209	1.94892
4	-9467.02	1.24069	1.04439	1.42248	1.37795	1.06209	1.94892
5	-9348.58	1.24069	1.04439	1.56472	1.37795	1.06209	1.94892
6	-9230.14	1.24069	1.04439	1.4936	1.37795	1.06209	1.94892
7	-9111.7	1.27953	1.17493	1.42248	1.37795	1.06209	1.94892
8	-8993.26	1.24069	1.1811	1.49573	1.37795	1.06209	1.94892
9	-8874.82	1.28023	1.24069	1.47638	1.37795	1.06209	1.94892
10	-8756.39	1.36364	1.13798	1.44928	1.37795	1.06209	1.94892
11	-8637.95	1.24069	1.04439	1.28205	1.37795	1.06209	1.94892
12	-8519.51	1.24069	1.17493	1.28205	1.37795	1.06209	1.94892
13	-8401.07	1.27273	1.04439	1.37795	1.37795	1.06209	1.94892
14	-8282.63	1.27273	0.995733	1.28205	1.37795	1.06209	1.94892
15	-8164.19	1.24069	1.06838	1.27953	1.37795	1.06209	1.94892
16	-8045.75	1.24069	1.17493	1.45455	1.37795	1.06209	1.94892
17	-7927.31	1.1811	0.992556	1.45455	1.37795	1.06209	1.94892
18	-7808.87	1.24069	1.1811	1.36364	1.37795	1.06209	1.94892
19	-7690.43	1.1811	1.06838	1.45455	1.37795	1.06209	1.94892
20	-7571.99	1.28023	1.24069	1.45455	1.37795	1.06209	1.94892
21	-7453.55	1.35135	0.913838	1.47638	1.37795	1.06582	1.94892
22	-7335.11	1.28023	0.913838	1.48883	1.37795	1.06209	1.94892
23	-7216.67	1.2091	1.04439	1.45455	1.37795	1.06209	1.94892
24	-7098.23	1.30548	1.1811	1.48883	1.37795	1.06209	1.94892
25	-6979.79	1.27273	1.06686	1.48883	1.37795	1.06209	1.94892
26	-6861.35	1.1811	0.995733	1.27273	1.37795	1.06209	1.94892
27	-6742.91	1.27273	1.04439	1.44928	1.37795	1.06209	1.94892
28	-6624.47	1.27273	1.24021	1.37795	1.37795	1.06209	1.94892
29	-6506.04	1.24069	1.09091	1.30548	1.37795	1.06209	1.94892
30	-6387.6	1.28205	1.09091	1.44928	1.37795	1.06209	1.94892
31	-6269.16	1.28205	1.09091	1.48883	1.37795	1.06209	1.94892
32	-6150.72	1.27273	1.17493	1.44928	1.37795	1.06209	1.94892
33	-6032.28	1.28205	1.18182	1.44928	1.37795	1.06209	1.94892
34	-5913.84	1.28205	1.09091	1.44928	1.37795	1.06209	1.94892
35	-5795.4	1.28205	1.09091	1.44928	1.37795	1.06209	1.94892
36	-5676.96	1.30548	0.924609	1.47638	1.37795	1.06209	1.94892
37	-5558.52	1.24069	0.854701	1.56658	1.37795	1.06209	1.94892
38	-5440.08	1.28205	1.09091	1.56658	1.37795	1.06209	1.94892
39	-5321.64	1.28205	1.24069	1.5748	1.37795	1.06209	1.94892
40	-5203.2	1.28205	1.24069	1.56658	1.37795	1.06209	1.94892
41	-5084.76	1.27953	1.09091	1.43603	1.37795	1.06209	1.94892
42	-4966.32	1.27953	1	1.50131	1.37795	1.06209	1.94892
43	-4847.88	1.28205	0.909091	1.44928	1.37795	1.06209	1.94892
44	-4729.44	1.28205	1.09091	1.37795	1.37795	1.06209	1.94892
45	-4611	1.30548	0.854701	1.56658	1.37795	1.06209	1.94892
46	-4492.56	1.43603	0.909091	1.56658	1.37795	1.06209	1.87059
47	-4374.12	1.44928	0.924609	1.73697	1.37795	1.06209	1.94892
48	-4255.68	1.44928	1	1.5748	1.37795	1.06209	1.94892
49	-4137.25	1.47638	0.909091	1.69713	1.37795	1.06209	1.94892
50	-4018.81	1.37795	1.28205	1.56658	1.37795	1.06209	1.94892
51	-3900.37	1.37795	1.28023	1.73697	1.37795	1.06209	1.94892
52	-3781.93	1.28205	1.1811	1.73913	1.37795	1.06209	1.94892
53	-3663.49	1.28205	1.1811	1.73697	1.37795	1.06209	1.94892
54	-3545.05	1.37795	1.28023	1.73913	1.37795	1.06209	1.94892
55	-3426.61	1.28205	1.1811	1.73913	1.37795	1.06209	1.94892
56	-3308.17	1.28205	1.1811	1.82768	1.37795	1.06209	1.94892
57	-3189.73	1.35135	1.27953	1.82768	1.37795	1.06209	1.94892
58	-3071.29	1.5748	1.28205	1.98511	1.37795	1.06209	1.94892
59	-2952.85	1.56658	1.28205	1.73913	1.37795	1.06209	1.94892
60	-2834.41	1.7094	1.56472	1.7624	1.37795	1.06209	1.94892
61	-2715.97	1.70697	1.56658	1.98511	1.37795	1.06209	1.94892
62	-2597.53	1.7094	1.45455	2.06259	1.37795	1.06209	1.94892
63	-2479.09	1.82768	1.37795	2.02899	1.37795	1.06209	1.94892
64	-2360.65	1.56658	1.28205	2.02899	1.37795	1.06209	1.94892
65	-2242.21	1.82768	1.45455	2.02899	1.37795	1.06209	1.94892
66	-2123.77	1.73913	1.28205	2.08877	1.37795	1.06209	1.94892
67	-2005.33	1.73913	1.28205	1.95822	1.37795	1.06209	1.94892
68	-1886.89	1.73913	1.28205	1.95822	1.37795	1.06209	1.94892
69	-1768.46	1.69713	1.45455	1.77809	1.37795	1.06209	1.94892
70	-1650.02	1.69713	1.5748	1.99147	1.37795	1.06209	1.94892
71	-1531.58	1.72727	1.69713	2.02899	1.37795	1.06209	1.94892
72	-1413.14	1.63636	1.56658	2.02899	1.37795	1.06209	1.94892
73	-1294.7	1.81818	1.37795	2.48139	1.37795	1.06209	1.94892
74	-1176.26	1.81818	1.37795	2.23325	1.37795	1.06209	1.94892
75	-1057.82	1.81818	1.37795	2.34987	1.37795	1.06209	1.94892
76	-939.379	1.90909	1.37795	2.27596	1.37795	1.06209	1.94892
77	-820.94	2	1.30548	2.23325	1.37795	1.13121	1.94892
78	-702.5	1.77809	1.43603	2.08877	1.37795	1.06582	1.94892
79	-584.061	1.7094	1.69713	2.23325	1.37795	1.06582	1.94892
80	-465.621	1.82768	1.70697	2.23325	1.37795	1.06209	1.94892
81	-347.182	1.63585	1.56658	2	1.37795	1.06582	1.94892
82	-228.742	1.81818	1.5748	1.98511	1.37795	1.06209	1.94892
83	-110.303	1.69713	1.47638	1.98511	1.37795	1.06582	1.94892
84	8.13687	1.81818	1.47638	1.98511	1.37795	1.06209	1.94892
85	126.576	1.5748	1.28205	1.73697	1.37795	1.06209	1.94892
86	245.016	1.73697	1.28205	1.77165	1.37795	1.06209	1.94892
87	363.455	1.5748	1.45455	1.73913	1.37795	1.06209	1.94892
88	481.895	1.28205	1.15207	1.73913	1.37795	1.06209	1.94892
89	600.334	1.28205	1.1811	1.44928	1.37795	1.06209	1.94892
90	718.774	1.04439	0.854701	1.44928	1.37795	1.06209	1.94892
91	837.213	1.04439	0.711238	1.44928	1.37795	1.06582	1.94892
92	955.653	1.09091	0.590551	1.44928	1.37795	1.06209	1.94892
93	1074.09	0.848564	0.590551	1.15942	1.37795	1.06209	1.94892
94	1192.53	0.78329	0.460829	1.15942	1.37795	1.06209	1.94892
95	1310.97	0.78329	0.42735	1.15942	1.37795	1.06209	1.94892
96	1429.41	0.718016	0.42735	1.15942	1.37795	1.06209	1.94892
97	1547.85	0.652742	0.42735	1.04439	1.37795	1.06209	1.94892
98	1666.29	0.78329	0.230415	0.909091	1.37795	1.06209	1.94892
99	1784.73	0.78329	0.230415	0.909091	1.37795	1.06209	1.94892
100	1903.17	0.78329	0.19685	0.869565	1.37795	1.06209	1.94892
101	2021.61	0.652742	0.230415	0.869565	1.37795	1.06209	1.94892
102	2140.05	0.522193	0.230415	0.869565	1.37795	1.09665	1.94892
103	2258.49	0.522193	0.230415	0.869565	1.37795	1.06209	1.94892
104	2376.93	0.522193	0.230415	0.78329	1.37795	1.06209	1.94892
105	2495.37	0.522193	0.230415	0.78329	1.37795	1.06209	1.94892
106	2613.81	0.426743	0.230415	0.78329	1.37795	1.06209	1.94892
107	2732.25	0.522193	0.426743	0.744417	1.37795	1.06209	1.94892
108	2850.68	0.652742	0.426743	0.744417	1.37795	1.06209	1.94892
109	2969.12	0.727273	0.426743	0.869565	1.37795	1.06209	1.94892
110	3087.56	0.652742	0.426743	0.992556	1.37795	1.06209	1.94892
111	3206	0.78329	0.497866	0.909091	1.37795	1.06209	1.94892
112	3324.44	0.854701	0.426743	0.992556	1.37795	1.06209	1.94892
113	3442.88	0.909091	0.426743	0.992556	1.37795	1.06209	1.94892
114	3561.32	0.744417	0.426743	1.04439	1.37795	1.06209	1.94892
115	3679.76	0.744417	0.426743	1	1.37795	1.06209	1.94892
116	3798.2	0.992556	0.426743	1.09091	1.37795	1.06209	1.94892
117	3916.64	0.992556	0.688976	1.09091	1.37795	1.06209	1.94892
118	4035.08	0.992556	0.78329	1.09091	1.37795	1.06209	1.94892
119	4153.52	0.992556	0.56899	1.27273	1.37795	1.06209	1.94892
120	4271.96	1.15942	0.56899	1.27273	1.37795	1.06209	1.94892
121	4390.4	1.1811	0.56899	1.30548	1.37795	1.06209	1.94892
122	4508.84	1.1811	0.711238	1.36364	1.37795	1.06209	1.94892
123	4627.28	1.15942	0.78329	1.27273	1.37795	1.06209	1.94892
124	4745.72	1.15942	0.78329	1.27273	1.37795	1.06209	1.94892
125	4864.16	1.15942	0.782361	1.27953	1.37795	1.06209	1.94892
126	4982.6	1.15942	0.782361	1.28205	1.37795	1.06209	1.94892
127	5101.03	1.15942	0.853485	1.36364	1.37795	1.06209	1.94892
128	5219.47	1.28205	0.853485	1.37795	1.37795	1.06209	1.94892
129	5337.91	1.37795	0.711238	1.63636	1.37795	1.06209	1.94892
130	5456.35	1.44928	0.711238	1.63636	1.37795	1.06209	1.94892
131	5574.79	1.27953	0.782361	1.56658	1.37795	1.06209	1.94892
132	5693.23	1.44928	0.782361	1.47638	1.37795	1.06209	1.87059
133	5811.67	1.27273	0.806452	1.5748	1.37795	1.06209	1.94892
134	5930.11	1.44928	0.782361	1.5748	1.37795	1.06209	1.87059
135	6048.55	1.28205	0.995733	1.44928	1.37795	1.06209	1.94892
136	6166.99	1.36364	0.995733	1.44928	1.37795	1.06209	1.87059
137	6285.43	1.28205	0.921659	1.45455	1.37795	1.06209	1.94892
138	6403.87	1.28205	1.03687	1.44928	1.37795	1.06209	1.87059
139	6522.31	1.28205	0.921659	1.44928	1.37795	1.06209	1.87059
140	6640.75	1.28205	1.15207	1.44928	1.37795	1.06582	1.87059
141	6759.19	1.24069	1.15207	1.37795	1.37795	1.06209	1.87059
142	6877.63	1.27273	1.15207	1.28205	1.37795	1.06209	1.94892
143	6996.07	1.24069	1.15207	1.37795	1.37795	1.06209	1.94892
144	7114.51	1.28023	1.09091	1.44928	1.37795	1.06209	1.87059
145	7232.95	1.28205	1.13798	1.44928	1.37795	1.06209	1.94892
146	7351.39	1.1811	0.995733	1.28205	1.37795	1.06209	1.90975
147	7469.82	1.1811	1.13798	1.44928	1.37795	1.06209	1.94892
148	7588.26	1.09091	0.921659	1.48883	1.37795	1.06209	1.94892
149	7706.7	1.2091	1	1.73697	1.37795	1.06209	1.94892
150	7825.14	1.28205	1.09091	1.48883	1.37795	1.06209	1.94892
151	7943.58	1.13798	0.854701	1.48883	1.37795	1.06209	1.94892
152	8062.02	1.28205	1.06686	1.48883	1.37795	1.06209	1.87059
153	8180.46	1.28205	1.09091	1.48883	1.37795	1.06209	1.87059
154	8298.9	1.27953	0.995733	1.48883	1.37795	1.06209	1.87059
155	8417.34	1.09091	0.921659	1.48883	1.37795	1.06209	1.87059
156	8535.78	1.1811	1.06686	1.73697	1.37795	1.06209	1.87059
157	8654.22	1.1811	0.995733	1.48883	1.37795	1.06209	1.87059
158	8772.66	1.28023	1.1811	1.48883	1.37795	1.06209	1.94892
159	8891.1	1.27273	1.08268	1.73697	1.37795	1.06209	1.87059
160	9009.54	1.27273	1.03687	1.73697	1.37795	1.06209	1.94892
161	9127.98	1.18182	1.15207	1.73697	1.37795	1.06209	1.87059
162	9246.42	1.27273	0.984252	1.73697	1.37795	1.06209	1.94892
163	9364.86	1.15207	1.08268	1.73697	1.37795	1.06209	1.94892
164	9483.3	1.27273	0.984252	1.73697	1.37795	1.06209	1.94892
165	9601.74	1.1811	1.03687	1.48883	1.37795	1.06582	1.94892
166	9720.18	1.09091	0.979263	1.48883	1.37795	1.06209	1.94892
167	9838.61	1.09091	0.984252	1.44928	1.37795	1.06209	1.94892
168	9948.92	1.27953	1.06686	1.44928	1.37795	1.06209	1.92933
