# Supplementary material for: The rapid developmental rise of somatic inhibition disengages hippocampal dynamics from self-motion
Source: eLife journal article supplement (doi:10.7554/elife.78116), 2022-07-20
Supplement: supp [file data_and_rnd_psth_P5_all_moves_no_cell_type_groups_.xlsx]

## Sheet: Sheet1
	Time	Median_active_cells	Percentile_25	Percentile_75	rnd_Median_active_cells	rnd_Percentile_5	rnd_Percentile_95
0	-9940.78	0.648357	0.354724	1.0366	1.63595	0.433356	3.42514
1	-9822.34	0.648357	0.354724	1.0366	1.63595	0.433356	3.42514
2	-9703.9	0.648357	0.354724	0.957481	1.63595	0.433356	3.42514
3	-9585.46	0.648357	0.354724	0.957481	1.63595	0.433356	3.42514
4	-9467.02	0.648357	0.447362	0.957481	1.63595	0.433356	3.42514
5	-9348.58	0.648357	0.447362	0.957481	1.63595	0.433356	3.42514
6	-9230.14	0.648357	0.447362	0.957481	1.63595	0.433356	3.42514
7	-9111.7	0.550701	0.447362	0.957481	1.63595	0.433356	3.42514
8	-8993.26	0.550701	0.447362	0.957481	1.63595	0.433356	3.42514
9	-8874.82	0.550701	0.447362	1.0366	1.63595	0.433356	3.42514
10	-8756.39	0.777223	0.447362	1.0366	1.63595	0.433356	3.42514
11	-8637.95	0.648357	0.447362	0.997038	1.63595	0.433356	3.42514
12	-8519.51	0.648357	0.447362	0.997038	1.63595	0.433356	3.42514
13	-8401.07	0.627592	0.340168	0.997038	1.63595	0.433356	3.42514
14	-8282.63	0.627592	0.340168	1.0366	1.63595	0.433356	3.42514
15	-8164.19	0.476792	0.3014	0.997038	1.63595	0.433356	3.42514
16	-8045.75	0.648357	0.447362	0.957481	1.63595	0.433356	3.42514
17	-7927.31	0.648357	0.354724	0.957481	1.63595	0.433356	3.42514
18	-7808.87	0.648357	0.354724	0.957481	1.63595	0.433356	3.42514
19	-7690.43	0.648357	0.354724	0.957481	1.63595	0.433356	3.42514
20	-7571.99	0.648357	0.354724	0.957481	1.63595	0.433356	3.42514
21	-7453.55	0.648357	0.354724	0.957481	1.63595	0.433356	3.42514
22	-7335.11	0.574449	0.3014	0.878367	1.63595	0.433356	3.42514
23	-7216.67	0.476792	0.3014	0.917924	1.63595	0.433356	3.42514
24	-7098.23	0.550701	0.354724	0.957481	1.63595	0.433356	3.42514
25	-6979.79	0.550701	0.447362	0.878367	1.63595	0.433356	3.42514
26	-6861.35	0.550701	0.354724	0.878367	1.63595	0.433356	3.42514
27	-6742.91	0.550701	0.354724	0.957481	1.63595	0.433356	3.42514
28	-6624.47	0.453044	0.354724	0.878367	1.63595	0.433356	3.42514
29	-6506.04	0.453044	0.354724	0.878367	1.63595	0.433356	3.42514
30	-6387.6	0.550701	0.354724	0.957481	1.63595	0.433356	3.42514
31	-6269.16	0.453044	0.354724	0.957481	1.63595	0.433356	3.42514
32	-6150.72	0.550701	0.354724	0.878367	1.63595	0.433356	3.42514
33	-6032.28	0.550701	0.354724	0.957481	1.63595	0.433356	3.42514
34	-5913.84	0.550701	0.354724	0.957481	1.63595	0.433356	3.42514
35	-5795.4	0.679567	0.354724	0.917924	1.63595	0.433356	3.42514
36	-5676.96	0.679567	0.354724	0.917924	1.63595	0.433356	3.42514
37	-5558.52	0.58191	0.354724	0.957481	1.63595	0.433356	3.42514
38	-5440.08	0.58191	0.354724	0.917924	1.63595	0.433356	3.42514
39	-5321.64	0.679567	0.354724	0.957481	1.63595	0.433356	3.42514
40	-5203.2	0.58191	0.354724	0.878367	1.63595	0.433356	3.42514
41	-5084.76	0.679567	0.354724	0.878367	1.63595	0.433356	3.42514
42	-4966.32	0.679567	0.354724	0.878367	1.63595	0.433356	3.42514
43	-4847.88	0.720319	0.354724	1.08965	1.63595	0.433356	3.42514
44	-4729.44	0.679567	0.354724	0.917924	1.63595	0.433356	3.42514
45	-4611	0.679567	0.354724	0.957481	1.63595	0.433356	3.42514
46	-4492.56	0.679567	0.354724	0.957481	1.63595	0.433356	3.42514
47	-4374.12	0.679567	0.354724	0.957481	1.63595	0.433356	3.42514
48	-4255.68	0.679567	0.354724	0.957481	1.63595	0.433356	3.42514
49	-4137.25	0.679567	0.354724	0.917924	1.63595	0.433356	3.42514
50	-4018.81	0.679567	0.354724	0.957481	1.63595	0.433356	3.42514
51	-3900.37	0.679567	0.354724	0.878367	1.63595	0.433356	3.42514
52	-3781.93	0.679567	0.354724	0.957481	1.63595	0.433356	3.42514
53	-3663.49	0.720319	0.31523	1.08965	1.63595	0.433356	3.42514
54	-3545.05	0.720319	0.31523	1.08965	1.63595	0.433356	3.42514
55	-3426.61	0.817975	0.354724	1.08965	1.63595	0.433356	3.42514
56	-3308.17	0.720319	0.354724	1.27153	1.63595	0.433356	3.42514
57	-3189.73	0.817975	0.354724	1.32251	1.63595	0.433356	3.42514
58	-3071.29	0.720319	0.354724	1.27153	1.63595	0.433356	3.42514
59	-2952.85	0.817975	0.354724	1.30375	1.63595	0.433356	3.42514
60	-2834.41	0.817975	0.354724	1.15286	1.63595	0.433356	3.42514
61	-2715.97	0.817975	0.354724	1.33597	1.63595	0.433356	3.42514
62	-2597.53	0.817975	0.354724	1.27153	1.63595	0.433356	3.42514
63	-2479.09	0.817975	0.354724	1.4004	1.63595	0.433356	3.42514
64	-2360.65	0.915632	0.354724	1.33999	1.63595	0.433356	3.42514
65	-2242.21	0.866804	0.354724	1.33999	1.63595	0.433356	3.42514
66	-2123.77	0.915632	0.354724	1.45866	1.63595	0.433356	3.42514
67	-2005.33	0.915632	0.354724	1.33999	1.63595	0.433356	3.42514
68	-1886.89	0.915632	0.354724	1.33999	1.63595	0.433356	3.42514
69	-1768.46	0.915632	0.63046	1.33999	1.63595	0.433356	3.42514
70	-1650.02	0.915632	0.63046	1.33999	1.63595	0.433356	3.42514
71	-1531.58	0.915632	0.63046	1.56744	1.63595	0.433356	3.42514
72	-1413.14	1.01329	0.492592	1.70217	1.63595	0.433356	3.42514
73	-1294.7	0.96446	0.354724	1.56744	1.63595	0.433356	3.42514
74	-1176.26	0.915632	0.63046	1.56744	1.63595	0.433356	3.42514
75	-1057.82	0.96446	0.63046	1.56744	1.63595	0.433356	3.42514
76	-939.379	0.96446	0.63046	1.45866	1.63595	0.433356	3.42514
77	-820.94	1.01329	0.63046	1.56744	1.63595	0.433356	3.42514
78	-702.5	1.15977	0.63046	1.56744	1.63595	0.433356	3.42514
79	-584.061	1.11094	0.63046	1.56744	1.63595	0.433356	3.42514
80	-465.621	1.32462	0.906195	1.56744	1.63595	0.433356	3.42514
81	-347.182	1.52356	0.906195	1.86799	1.63595	0.433356	3.42514
82	-228.742	1.47473	0.906195	1.86799	1.63595	0.433356	3.42514
83	-110.303	1.77382	1.2657	2.31128	1.63595	0.433356	3.42514
84	8.13687	2.07241	1.36104	2.83221	1.63595	0.433356	3.42514
85	126.576	2.94947	2.00207	3.98158	1.63595	0.433356	3.42514
86	245.016	3.94272	2.68259	4.93765	1.63595	0.433356	3.42514
87	363.455	5.0942	3.32361	5.89372	1.63595	0.433356	3.42514
88	481.895	5.59719	3.96657	6.95958	1.63595	0.433356	3.42514
89	600.334	5.67555	4.00413	7.13983	1.63595	0.433356	3.42514
90	718.774	5.39613	3.5063	7.17421	1.63595	0.433356	3.42514
91	837.213	5.20082	2.58072	6.59029	1.63595	0.433356	3.42514
92	955.653	4.57816	2.20661	6.59029	1.63595	0.433356	3.42514
93	1074.09	4.4805	1.69463	5.81508	1.63595	0.433356	3.42514
94	1192.53	4.18753	1.34209	5.03987	1.63595	0.433356	3.42514
95	1310.97	3.51604	1.34209	4.26466	1.63595	0.433356	3.42514
96	1429.41	3.41839	1.19093	3.68275	1.63595	0.433356	3.42514
97	1547.85	2.82844	1.13169	3.39355	1.63595	0.433356	3.42514
98	1666.29	2.57071	1.14313	3.02734	1.63595	0.433356	3.42514
99	1784.73	2.01449	1.08388	2.75879	1.63595	0.433356	3.42514
100	1903.17	1.88563	0.938198	2.6123	1.63595	0.433356	3.42514
101	2021.61	1.75676	0.938198	2.6123	1.63595	0.433356	3.42514
102	2140.05	1.75676	0.802812	2.39258	1.63595	0.433356	3.42514
103	2258.49	1.6279	0.806113	2.05078	1.63595	0.433356	3.42514
104	2376.93	1.49903	0.743571	1.97754	1.63595	0.433356	3.42514
105	2495.37	1.07168	0.684329	1.9043	1.63595	0.433356	3.42514
106	2613.81	1.07168	0.625087	1.75781	1.63595	0.433356	3.42514
107	2732.25	0.942814	0.565845	1.68457	1.63595	0.433356	3.42514
108	2850.68	0.942814	0.528341	1.46484	1.63595	0.433356	3.42514
109	2969.12	0.878381	0.409857	1.41602	1.63595	0.433356	3.42514
110	3087.56	0.813948	0.409857	1.46484	1.63595	0.433356	3.42514
111	3206	0.813948	0.396255	1.4327	1.63595	0.433356	3.42514
112	3324.44	0.813948	0.447362	1.35359	1.63595	0.433356	3.42514
113	3442.88	0.813948	0.354724	1.35359	1.63595	0.433356	3.42514
114	3561.32	0.813948	0.354724	1.28035	1.63595	0.433356	3.42514
115	3679.76	0.685082	0.354724	1.20711	1.63595	0.433356	3.42514
116	3798.2	0.685082	0.354724	1.09431	1.63595	0.433356	3.42514
117	3916.64	0.648357	0.354724	1.0366	1.63595	0.433356	3.42514
118	4035.08	0.648357	0.354724	1.0366	1.63595	0.433356	3.42514
119	4153.52	0.599529	0.354724	1.0366	1.63595	0.433356	3.42514
120	4271.96	0.599529	0.354724	1.0366	1.63595	0.433356	3.42514
121	4390.4	0.599529	0.354724	1.0366	1.63595	0.433356	3.42514
122	4508.84	0.550701	0.354724	1.0366	1.63595	0.433356	3.42514
123	4627.28	0.550701	0.354724	0.997038	1.63595	0.433356	3.42514
124	4745.72	0.550701	0.354724	0.957481	1.63595	0.433356	3.42514
125	4864.16	0.550701	0.31523	0.957481	1.63595	0.433356	3.42514
126	4982.6	0.453044	0.354724	0.957481	1.63595	0.433356	3.42514
127	5101.03	0.453044	0.325103	0.957481	1.63595	0.433356	3.42514
128	5219.47	0.453044	0.118483	0.957481	1.63595	0.433356	3.42514
129	5337.91	0.550701	0.145687	0.957481	1.63595	0.433356	3.42514
130	5456.35	0.550701	0.31523	0.957481	1.63595	0.433356	3.42514
131	5574.79	0.550701	0.31523	0.957481	1.63595	0.433356	3.42514
132	5693.23	0.550701	0.177362	0.957481	1.63595	0.433356	3.42514
133	5811.67	0.550701	0.145687	0.957481	1.63595	0.433356	3.42514
134	5930.11	0.550701	0.145687	0.957481	1.63595	0.433356	3.42514
135	6048.55	0.550701	0.145687	0.917924	1.63595	0.433356	3.42514
136	6166.99	0.453044	0.118483	0.957481	1.63595	0.433356	3.42514
137	6285.43	0.324178	0.118483	0.957481	1.63595	0.433356	3.42514
138	6403.87	0.453044	0.31523	0.878367	1.63595	0.433356	3.42514
139	6522.31	0.453044	0.177362	0.878367	1.63595	0.433356	3.42514
140	6640.75	0.453044	0.31523	0.878367	1.63595	0.433356	3.42514
141	6759.19	0.453044	0.31523	0.878367	1.63595	0.433356	3.42514
142	6877.63	0.453044	0.354724	0.878367	1.63595	0.433356	3.42514
143	6996.07	0.453044	0.236967	0.878367	1.63595	0.433356	3.42514
144	7114.51	0.453044	0.354724	0.878367	1.63595	0.433356	3.42514
145	7232.95	0.453044	0.354724	0.957481	1.63595	0.433356	3.42514
146	7351.39	0.453044	0.354724	0.957481	1.63595	0.433356	3.42514
147	7469.82	0.550701	0.31523	0.957481	1.63595	0.433356	3.42514
148	7588.26	0.550701	0.354724	0.957481	1.63595	0.433356	3.42514
149	7706.7	0.550701	0.354724	0.957481	1.63595	0.433356	3.42514
150	7825.14	0.550701	0.334977	0.957481	1.63595	0.433356	3.42514
151	7943.58	0.550701	0.354724	0.878367	1.63595	0.433356	3.42514
152	8062.02	0.550701	0.354724	0.878367	1.63595	0.433356	3.42514
153	8180.46	0.550701	0.354724	0.957481	1.63595	0.433356	3.42514
154	8298.9	0.550701	0.354724	0.957481	1.63595	0.433356	3.42514
155	8417.34	0.550701	0.354724	0.957481	1.63595	0.433356	3.42514
156	8535.78	0.550701	0.354724	0.957481	1.63595	0.433356	3.42514
157	8654.22	0.486268	0.354724	0.957481	1.63595	0.433356	3.42514
158	8772.66	0.550701	0.354724	0.957481	1.63595	0.433356	3.42514
159	8891.1	0.550701	0.354724	0.957481	1.63595	0.433356	3.42514
160	9009.54	0.550701	0.354724	0.957481	1.63595	0.433356	3.42514
161	9127.98	0.550701	0.354724	0.957481	1.63595	0.433356	3.42514
162	9246.42	0.550701	0.354724	0.957481	1.63595	0.433356	3.42514
163	9364.86	0.550701	0.354724	0.957481	1.63595	0.433356	3.42514
164	9483.3	0.550701	0.354724	0.957481	1.63595	0.433356	3.42514
165	9601.74	0.550701	0.354724	0.957481	1.63595	0.433356	3.42514
166	9720.18	0.550701	0.354724	0.957481	1.63595	0.433356	3.42514
167	9838.61	0.550701	0.354724	0.957481	1.63595	0.433356	3.42514
168	9948.92	0.631745	0.354724	0.997038	1.63595	0.433356	3.42514
