# Supplementary material for: The rapid developmental rise of somatic inhibition disengages hippocampal dynamics from self-motion
Source: eLife journal article supplement (doi:10.7554/elife.78116), 2022-07-20
Supplement: supp [file data_and_rnd_psth_P6_all_moves_no_cell_type_groups_.xlsx]

## Sheet: Sheet1
	Time	Median_active_cells	Percentile_25	Percentile_75	rnd_Median_active_cells	rnd_Percentile_5	rnd_Percentile_95
0	-9940.78	1.06007	0.530035	1.25	1.41343	1.27034	2.15612
1	-9822.34	0.883392	0.530035	1.25	1.41343	1.27034	2.15612
2	-9703.9	0.883392	0.530035	1.25	1.41343	1.27034	2.15612
3	-9585.46	1.14841	0.530035	1.25	1.41343	1.27034	2.15612
4	-9467.02	1.25	0.530035	1.41343	1.41343	1.27034	2.15612
5	-9348.58	1.25	0.706714	1.59011	1.41343	1.27034	2.15612
6	-9230.14	1.25	0.530035	1.41343	1.41343	1.27034	2.15612
7	-9111.7	0.833333	0.530035	1.41343	1.41343	1.27034	2.15612
8	-8993.26	0.833333	0.530035	1.23675	1.41343	1.27034	2.15612
9	-8874.82	0.833333	0.530035	1.23675	1.41343	1.27034	2.15612
10	-8756.39	0.833333	0.530035	1.50177	1.41343	1.27034	2.15612
11	-8637.95	1.23675	0.530035	1.25	1.41343	1.27034	2.15612
12	-8519.51	1.23675	0.530035	1.25	1.41343	1.27034	2.15612
13	-8401.07	1.25	0.618375	1.59011	1.41343	1.27034	2.15612
14	-8282.63	1.25	0.530035	1.50177	1.41343	1.27034	2.15612
15	-8164.19	1.25	0.530035	1.41343	1.41343	1.27034	2.15612
16	-8045.75	1.25	0.618375	1.41343	1.41343	1.27034	2.15612
17	-7927.31	1.14841	0.706714	1.25	1.41343	1.27034	2.15612
18	-7808.87	0.883392	0.530035	1.25	1.41343	1.27034	2.15612
19	-7690.43	0.706714	0.706714	1.25	1.41343	1.27034	2.15612
20	-7571.99	0.706714	0.530035	1.25	1.41343	1.27034	2.15612
21	-7453.55	0.833333	0.530035	0.883392	1.41343	1.27034	2.15612
22	-7335.11	0.833333	0.530035	1.06007	1.41343	1.27034	2.15612
23	-7216.67	1.23675	0.530035	1.25	1.41343	1.27034	2.15612
24	-7098.23	0.833333	0.530035	1.23675	1.41343	1.27034	2.15612
25	-6979.79	0.833333	0.530035	1.50177	1.41343	1.27034	2.15612
26	-6861.35	0.833333	0.530035	1.59011	1.41343	1.27034	2.15612
27	-6742.91	0.833333	0.530035	1.06007	1.41343	1.27034	2.15612
28	-6624.47	0.833333	0.706714	1.06007	1.41343	1.27034	2.15612
29	-6506.04	1.06007	0.530035	1.25	1.41343	1.27034	2.15612
30	-6387.6	0.833333	0.530035	1.06007	1.41343	1.27034	2.15612
31	-6269.16	0.833333	0.530035	0.883392	1.41343	1.27034	2.15612
32	-6150.72	1.14841	0.530035	1.25	1.41343	1.27034	2.15612
33	-6032.28	1.06007	0.530035	1.25	1.41343	1.27034	2.15612
34	-5913.84	0.833333	0.530035	0.883392	1.41343	1.27034	2.15612
35	-5795.4	0.706714	0.530035	0.833333	1.41343	1.27034	2.15612
36	-5676.96	0.530035	0.530035	0.833333	1.41343	1.27034	2.15612
37	-5558.52	0.530035	0.530035	0.833333	1.41343	1.27034	2.15612
38	-5440.08	0.530035	0.530035	0.833333	1.41343	1.27034	2.15612
39	-5321.64	0.618375	0.530035	0.833333	1.41343	1.27034	2.15612
40	-5203.2	0.530035	0.530035	1.25	1.41343	1.27034	2.15612
41	-5084.76	0.530035	0.530035	1.25	1.41343	1.27034	2.15612
42	-4966.32	0.530035	0.493827	1.25	1.41343	1.27034	2.15612
43	-4847.88	0.530035	0.493827	1.25	1.41343	1.27034	2.15612
44	-4729.44	0.530035	0.493827	1.25	1.41343	1.27034	2.15612
45	-4611	0.530035	0.37037	1.04167	1.41343	1.27034	2.15612
46	-4492.56	0.493827	0.353357	1.04167	1.41343	1.27034	2.15612
47	-4374.12	0.493827	0.353357	0.833333	1.41343	1.27034	2.15612
48	-4255.68	0.493827	0.441696	0.833333	1.41343	1.27034	2.15612
49	-4137.25	0.493827	0.353357	0.833333	1.41343	1.27034	2.15612
50	-4018.81	0.493827	0.353357	0.833333	1.41343	1.27034	2.15612
51	-3900.37	0.530035	0.530035	0.833333	1.41343	1.27034	2.15612
52	-3781.93	0.530035	0.493827	0.833333	1.41343	1.27034	2.15612
53	-3663.49	0.530035	0.493827	0.833333	1.41343	1.27034	2.15612
54	-3545.05	0.530035	0.493827	0.833333	1.41343	1.27034	2.15612
55	-3426.61	0.530035	0.37037	0.833333	1.41343	1.27034	2.15612
56	-3308.17	0.530035	0.493827	0.833333	1.41343	1.27034	2.15612
57	-3189.73	0.530035	0.493827	0.833333	1.41343	1.27034	2.15612
58	-3071.29	0.530035	0.441696	0.833333	1.41343	1.27034	2.15612
59	-2952.85	0.530035	0.353357	0.833333	1.41343	1.27034	2.15612
60	-2834.41	0.530035	0.397527	0.833333	1.41343	1.27034	2.15612
61	-2715.97	0.530035	0.530035	0.833333	1.41343	1.27034	2.15612
62	-2597.53	0.618375	0.530035	1.25	1.41343	1.27034	2.15612
63	-2479.09	0.795053	0.441696	1.25	1.41343	1.27034	2.15612
64	-2360.65	0.839223	0.441696	1.25	1.41343	1.27034	2.15612
65	-2242.21	0.706714	0.493827	1.25	1.41343	1.27034	2.15612
66	-2123.77	0.618375	0.493827	1.25	1.41343	1.27034	2.15612
67	-2005.33	0.706714	0.493827	1.25	1.41343	1.27034	2.15612
68	-1886.89	0.662544	0.530035	1.25	1.41343	1.27034	2.15612
69	-1768.46	0.618375	0.493827	0.833333	1.41343	1.27034	2.15612
70	-1650.02	0.530035	0.493827	0.833333	1.41343	1.27034	2.15612
71	-1531.58	0.662544	0.530035	0.833333	1.41343	1.27034	2.15612
72	-1413.14	0.618375	0.530035	0.833333	1.41343	1.27034	2.15612
73	-1294.7	0.618375	0.530035	0.833333	1.41343	1.27034	2.15612
74	-1176.26	0.530035	0.493827	0.833333	1.41343	1.27034	2.15612
75	-1057.82	0.574205	0.493827	0.833333	1.41343	1.27034	2.15612
76	-939.379	0.493827	0.416667	0.618375	1.41343	1.27034	2.15612
77	-820.94	0.530035	0.493827	0.618375	1.41343	1.27034	2.15612
78	-702.5	0.530035	0.493827	0.530035	1.41343	1.27034	2.15612
79	-584.061	0.530035	0.493827	0.618375	1.41343	1.27034	2.15612
80	-465.621	0.530035	0.493827	0.618375	1.41343	1.27034	2.15612
81	-347.182	0.530035	0.416667	0.530035	1.41343	1.27034	2.15612
82	-228.742	0.530035	0.432099	0.833333	1.41343	1.27034	2.15612
83	-110.303	0.530035	0.530035	0.833333	1.41343	1.27034	2.15612
84	8.13687	0.706714	0.493827	1.66667	1.41343	1.27034	2.15612
85	126.576	1.04938	0.883392	2.08333	1.41343	1.27034	2.15612
86	245.016	1.76678	1.7284	2.91667	1.41343	1.27034	2.15612
87	363.455	2.22222	1.76678	3.33333	1.41343	1.27034	2.15612
88	481.895	2.71605	2.56184	3.33333	1.41343	1.27034	2.15612
89	600.334	2.91667	2.71605	3.26855	1.41343	1.27034	2.15612
90	718.774	2.59259	2.08333	3.88693	1.41343	1.27034	2.15612
91	837.213	2.46914	2.20848	3.79859	1.41343	1.27034	2.15612
92	955.653	2.12014	1.97531	3.35689	1.41343	1.27034	2.15612
93	1074.09	2.03704	2.0318	2.95936	1.41343	1.27034	2.15612
94	1192.53	2.12014	1.35802	3.00353	1.41343	1.27034	2.15612
95	1310.97	2.0318	1.23457	2.20848	1.41343	1.27034	2.15612
96	1429.41	1.54594	1.23457	1.76678	1.41343	1.27034	2.15612
97	1547.85	1.32509	0.987654	1.50177	1.41343	1.27034	2.15612
98	1666.29	1.06007	0.740741	1.59011	1.41343	1.27034	2.15612
99	1784.73	0.971731	0.740741	1.23675	1.41343	1.27034	2.15612
100	1903.17	0.833333	0.706714	1.23675	1.41343	1.27034	2.15612
101	2021.61	0.706714	0.416667	1.14841	1.41343	1.27034	2.15612
102	2140.05	0.833333	0.706714	1.14841	1.41343	1.27034	2.15612
103	2258.49	0.833333	0.441696	1.23675	1.41343	1.27034	2.15612
104	2376.93	0.833333	0.353357	1.06007	1.41343	1.27034	2.15612
105	2495.37	0.795053	0.353357	0.833333	1.41343	1.27034	2.15612
106	2613.81	0.833333	0.246914	0.883392	1.41343	1.27034	2.15612
107	2732.25	0.883392	0.246914	1.25	1.41343	1.27034	2.15612
108	2850.68	0.883392	0.246914	1.25	1.41343	1.27034	2.15612
109	2969.12	0.883392	0.246914	1.25	1.41343	1.27034	2.15612
110	3087.56	0.706714	0.246914	0.833333	1.41343	1.27034	2.15612
111	3206	0.706714	0.246914	0.833333	1.41343	1.27034	2.15612
112	3324.44	0.618375	0.246914	0.833333	1.41343	1.27034	2.15612
113	3442.88	0.530035	0.246914	1.25	1.41343	1.27034	2.15612
114	3561.32	0.530035	0.246914	1.25	1.41343	1.27034	2.15612
115	3679.76	0.530035	0.246914	1.25	1.41343	1.27034	2.15612
116	3798.2	0.706714	0.246914	0.833333	1.41343	1.27034	2.15612
117	3916.64	0.530035	0.246914	1.25	1.41343	1.27034	2.15612
118	4035.08	0.530035	0.246914	1.25	1.41343	1.27034	2.15612
119	4153.52	0.530035	0.246914	1.25	1.41343	1.27034	2.15612
120	4271.96	0.353357	0.246914	1.25	1.41343	1.27034	2.15612
121	4390.4	0.530035	0.246914	1.25	1.41343	1.27034	2.15612
122	4508.84	0.441696	0.246914	1.25	1.41343	1.27034	2.15612
123	4627.28	0.353357	0.246914	1.25	1.41343	1.27034	2.15612
124	4745.72	0.353357	0.246914	1.25	1.41343	1.27034	2.15612
125	4864.16	0.353357	0.246914	1.25	1.41343	1.27034	2.15612
126	4982.6	0.353357	0.246914	1.25	1.41343	1.27034	2.15612
127	5101.03	0.353357	0.246914	1.25	1.41343	1.27034	2.15612
128	5219.47	0.353357	0.246914	1.25	1.41343	1.27034	2.15612
129	5337.91	0.353357	0.246914	1.25	1.41343	1.27034	2.15612
130	5456.35	0.353357	0.246914	1.25	1.41343	1.27034	2.15612
131	5574.79	0.493827	0.353357	1.25	1.41343	1.27034	2.15612
132	5693.23	0.493827	0.353357	1.25	1.41343	1.27034	2.15612
133	5811.67	0.493827	0.441696	1.25	1.41343	1.27034	2.15612
134	5930.11	0.530035	0.493827	1.25	1.41343	1.27034	2.15612
135	6048.55	0.530035	0.493827	1.25	1.41343	1.27034	2.15612
136	6166.99	0.530035	0.37037	1.25	1.41343	1.27034	2.15612
137	6285.43	0.441696	0.246914	1.25	1.41343	1.27034	2.15612
138	6403.87	0.530035	0.246914	1.25	1.41343	1.27034	2.15612
139	6522.31	0.530035	0.493827	1.25	1.41343	1.27034	2.15612
140	6640.75	0.530035	0.493827	1.66667	1.41343	1.27034	2.15612
141	6759.19	0.530035	0.493827	1.66667	1.41343	1.27034	2.15612
142	6877.63	0.530035	0.493827	1.25	1.41343	1.27034	2.15612
143	6996.07	0.530035	0.493827	1.25	1.41343	1.27034	2.15612
144	7114.51	0.530035	0.493827	1.25	1.41343	1.27034	2.15612
145	7232.95	0.530035	0.493827	1.25	1.41343	1.27034	2.15612
146	7351.39	0.530035	0.493827	1.25	1.41343	1.27034	2.15612
147	7469.82	0.530035	0.493827	1.25	1.41343	1.27034	2.15612
148	7588.26	0.530035	0.246914	1.25	1.41343	1.27034	2.15612
149	7706.7	0.530035	0.493827	1.25	1.41343	1.27034	2.15612
150	7825.14	0.530035	0.308642	1.25	1.41343	1.27034	2.15612
151	7943.58	0.706714	0.246914	1.25	1.41343	1.27034	2.15612
152	8062.02	0.706714	0.246914	1.25	1.41343	1.27034	2.15612
153	8180.46	0.530035	0.493827	1.25	1.41343	1.27034	2.15612
154	8298.9	0.530035	0.493827	1.25	1.41343	1.27034	2.15612
155	8417.34	0.530035	0.493827	1.25	1.41343	1.27034	2.15612
156	8535.78	0.530035	0.493827	1.25	1.41343	1.27034	2.15612
157	8654.22	0.617284	0.530035	0.833333	1.41343	1.27034	2.15612
158	8772.66	0.617284	0.530035	0.833333	1.41343	1.27034	2.15612
159	8891.1	0.530035	0.493827	1.25	1.41343	1.27034	2.15612
160	9009.54	0.740741	0.530035	1.25	1.41343	1.27034	2.15612
161	9127.98	0.706714	0.679012	1.25	1.41343	1.27034	2.15612
162	9246.42	0.740741	0.530035	1.25	1.41343	1.27034	2.15612
163	9364.86	0.987654	0.706714	1.25	1.41343	1.27034	2.15612
164	9483.3	0.925926	0.706714	1.25	1.41343	1.27034	2.15612
165	9601.74	0.864198	0.706714	1.25	1.41343	1.27034	2.15612
166	9720.18	0.740741	0.530035	1.25	1.41343	1.27034	2.15612
167	9838.61	0.740741	0.530035	1.25	1.41343	1.27034	2.15612
168	9948.92	0.58642	0.530035	1.25	1.41343	1.27034	2.15612
