# Supplementary material for: The rapid developmental rise of somatic inhibition disengages hippocampal dynamics from self-motion
Source: eLife journal article supplement (doi:10.7554/elife.78116), 2022-07-20
Supplement: supp [file data_and_rnd_psth_P7_all_moves_no_cell_type_groups_.xlsx]

## Sheet: Sheet1
	Time	Median_active_cells	Percentile_25	Percentile_75	rnd_Median_active_cells	rnd_Percentile_5	rnd_Percentile_95
0	-9940.78	0.676153	0.277551	0.974696	1.19377	0.361132	2.05846
1	-9822.34	0.665169	0.301823	0.892885	1.19377	0.361132	2.05846
2	-9703.9	0.632102	0.367598	0.915111	1.19377	0.361132	2.05846
3	-9585.46	0.665169	0.301823	0.882407	1.1695	0.361132	2.05846
4	-9467.02	0.665169	0.289983	0.882407	1.14523	0.361132	2.05846
5	-9348.58	0.606067	0.289983	0.882407	1.19377	0.361132	2.05846
6	-9230.14	0.647486	0.367598	0.877769	1.14523	0.361132	2.05846
7	-9111.7	0.647486	0.367598	0.823644	1.1695	0.361132	2.05846
8	-8993.26	0.647486	0.408194	0.823644	1.19377	0.361132	2.05846
9	-8874.82	0.725277	0.408194	0.841318	1.19377	0.361132	2.05846
10	-8756.39	0.721088	0.408194	0.823644	1.19377	0.361132	2.05846
11	-8637.95	0.738856	0.408194	0.87609	1.19377	0.361132	2.05846
12	-8519.51	0.647486	0.408194	0.823644	1.19377	0.361132	2.05846
13	-8401.07	0.632102	0.408194	0.841318	1.19377	0.361132	2.05846
14	-8282.63	0.658471	0.408194	0.895171	1.14523	0.361132	2.05846
15	-8164.19	0.725856	0.408194	0.895171	1.14523	0.361132	2.05846
16	-8045.75	0.658471	0.408194	0.895171	1.14523	0.361132	2.05846
17	-7927.31	0.658471	0.408194	0.895171	1.14523	0.361132	2.05846
18	-7808.87	0.658471	0.513229	0.895171	1.14523	0.361132	2.05846
19	-7690.43	0.612806	0.408194	0.955959	1.19377	0.361132	2.05846
20	-7571.99	0.591085	0.367598	0.935164	1.19377	0.361132	2.05846
21	-7453.55	0.631278	0.367598	0.841318	1.1695	0.361132	2.05846
22	-7335.11	0.591085	0.367598	0.895171	1.19377	0.361132	2.05846
23	-7216.67	0.591085	0.367598	0.895171	1.14523	0.361132	2.05846
24	-7098.23	0.658471	0.367598	0.919453	1.14523	0.361132	2.05846
25	-6979.79	0.632435	0.367598	0.838035	1.14523	0.361132	2.05846
26	-6861.35	0.691537	0.289687	0.838035	1.14523	0.361132	2.05846
27	-6742.91	0.658471	0.243606	0.850203	1.1695	0.361132	2.05846
28	-6624.47	0.658471	0.352238	0.893222	1.18163	0.361132	2.05846
29	-6506.04	0.676153	0.352238	0.850203	1.19377	0.361132	2.05846
30	-6387.6	0.676153	0.183799	0.877759	1.14523	0.361132	2.05846
31	-6269.16	0.617052	0.352238	0.838035	1.14523	0.361132	2.05846
32	-6150.72	0.697438	0.367598	0.852489	1.1695	0.361132	2.05846
33	-6032.28	0.756539	0.367598	0.877759	1.14523	0.361132	2.05846
34	-5913.84	0.756539	0.32943	0.838035	1.19377	0.361132	2.05846
35	-5795.4	0.697438	0.259407	0.838035	1.14523	0.361132	2.05846
36	-5676.96	0.676153	0.302754	0.82722	1.19377	0.361132	2.05846
37	-5558.52	0.663252	0.302754	0.823644	1.14523	0.361132	2.05846
38	-5440.08	0.663252	0.302754	0.839388	1.14523	0.361132	2.05846
39	-5321.64	0.645569	0.281919	0.736704	1.14523	0.361132	2.05846
40	-5203.2	0.632102	0.269783	0.737676	1.14523	0.361132	2.05846
41	-5084.76	0.632102	0.269783	0.82414	1.19377	0.361132	2.05846
42	-4966.32	0.632102	0.259407	0.82414	1.14523	0.361132	2.05846
43	-4847.88	0.632102	0.259407	0.81223	1.14523	0.361132	2.05846
44	-4729.44	0.619201	0.259407	0.811052	1.14523	0.361132	2.05846
45	-4611	0.619201	0.275699	0.734071	1.14523	0.361132	2.05846
46	-4492.56	0.632102	0.302754	0.819509	1.19377	0.361132	2.05846
47	-4374.12	0.632102	0.302754	0.82414	1.14523	0.361132	2.05846
48	-4255.68	0.632102	0.302754	0.853691	1.14523	0.361132	2.05846
49	-4137.25	0.619201	0.302754	0.811052	1.14523	0.361132	2.05846
50	-4018.81	0.619201	0.302754	0.811052	1.14523	0.361132	2.05846
51	-3900.37	0.619201	0.302754	0.807477	1.14523	0.361132	2.05846
52	-3781.93	0.619201	0.259407	0.813325	1.14523	0.361132	2.05846
53	-3663.49	0.619201	0.259407	0.762786	1.14523	0.361132	2.05846
54	-3545.05	0.665169	0.259407	0.811052	1.19377	0.361132	2.05846
55	-3426.61	0.632102	0.282215	0.819509	1.19377	0.361132	2.05846
56	-3308.17	0.632102	0.302754	0.866067	1.19377	0.361132	2.05846
57	-3189.73	0.632102	0.302754	0.851968	1.1695	0.361132	2.05846
58	-3071.29	0.632102	0.44219	0.910972	1.14523	0.361132	2.05846
59	-2952.85	0.694416	0.4396	0.87095	1.19377	0.361132	2.05846
60	-2834.41	0.69472	0.302754	0.939479	1.19377	0.361132	2.05846
61	-2715.97	0.632102	0.4396	0.966422	1.19377	0.361132	2.05846
62	-2597.53	0.661349	0.44219	0.877769	1.19377	0.361132	2.05846
63	-2479.09	0.632102	0.4396	0.906983	1.19377	0.361132	2.05846
64	-2360.65	0.637077	0.44219	1.15084	1.19377	0.361132	2.05846
65	-2242.21	0.712488	0.44219	1.19517	1.14523	0.361132	2.05846
66	-2123.77	0.712488	0.302754	1.30251	1.14523	0.361132	2.05846
67	-2005.33	0.827575	0.302754	1.33661	1.14523	0.361132	2.05846
68	-1886.89	0.637077	0.302754	1.34208	1.14523	0.361132	2.05846
69	-1768.46	0.738856	0.367598	1.34208	1.14523	0.361132	2.05846
70	-1650.02	0.658471	0.428946	1.34208	1.14523	0.361132	2.05846
71	-1531.58	0.676733	0.476473	1.25326	1.15736	0.361132	2.05846
72	-1413.14	0.77382	0.476473	1.28054	1.14523	0.361132	2.05846
73	-1294.7	0.661349	0.476473	1.19517	1.14523	0.361132	2.05846
74	-1176.26	0.77382	0.476473	1.25099	1.14523	0.361132	2.05846
75	-1057.82	0.783241	0.408194	1.19517	1.14523	0.361132	2.05846
76	-939.379	0.710426	0.392834	1.33526	1.19377	0.361132	2.05846
77	-820.94	0.725277	0.476473	1.19517	1.19377	0.361132	2.05846
78	-702.5	0.734698	0.476473	1.42867	1.14523	0.361132	2.05846
79	-584.061	0.705659	0.592935	1.48941	1.14523	0.361132	2.05846
80	-465.621	0.754203	0.592935	1.33526	1.19377	0.361132	2.05846
81	-347.182	0.949562	0.592935	1.47535	1.14523	0.361132	2.05846
82	-228.742	0.705659	0.592935	1.3432	1.19377	0.361132	2.05846
83	-110.303	0.702781	0.547513	1.57612	1.19377	0.361132	2.05846
84	8.13687	0.892118	0.472356	1.91192	1.19377	0.361132	2.05846
85	126.576	1.16747	0.690097	2.45853	1.19377	0.361132	2.05846
86	245.016	1.25613	0.78726	2.92074	1.14523	0.361132	2.05846
87	363.455	1.56743	0.954876	3.05248	1.19377	0.361132	2.05846
88	481.895	1.76602	1.1208	3.42583	1.19377	0.361132	2.05846
89	600.334	2.03194	1.23417	3.33753	1.1695	0.361132	2.05846
90	718.774	1.95159	1.3716	3.14375	1.14523	0.361132	2.05846
91	837.213	1.9195	1.31566	2.93658	1.19377	0.361132	2.05846
92	955.653	1.77906	1.20853	2.633	1.14523	0.361132	2.05846
93	1074.09	1.51416	1.14824	2.33014	1.14523	0.361132	2.05846
94	1192.53	1.39542	0.969313	2.12183	1.1695	0.361132	2.05846
95	1310.97	1.29919	0.90547	1.99323	1.14523	0.361132	2.05846
96	1429.41	1.02162	0.893334	1.77622	1.14523	0.361132	2.05846
97	1547.85	0.914176	0.718683	1.50778	1.14523	0.361132	2.05846
98	1666.29	0.773044	0.603646	1.23934	1.14523	0.361132	2.05846
99	1784.73	0.705659	0.558844	1.1879	1.14523	0.361132	2.05846
100	1903.17	0.642271	0.543977	1.13646	1.14523	0.361132	2.05846
101	2021.61	0.658471	0.564429	0.919453	1.19377	0.361132	2.05846
102	2140.05	0.642271	0.472356	0.895171	1.14523	0.361132	2.05846
103	2258.49	0.589992	0.454131	0.673994	1.1695	0.361132	2.05846
104	2376.93	0.619201	0.454131	0.673994	1.14523	0.361132	2.05846
105	2495.37	0.539411	0.302754	0.647878	1.19377	0.361132	2.05846
106	2613.81	0.361041	0.282215	0.624131	1.19377	0.361132	2.05846
107	2732.25	0.361041	0.282215	0.645981	1.14523	0.361132	2.05846
108	2850.68	0.361041	0.294054	0.668303	1.14523	0.361132	2.05846
109	2969.12	0.307951	0.233479	0.604034	1.19377	0.361132	2.05846
110	3087.56	0.25816	0.151377	0.606929	1.19377	0.361132	2.05846
111	3206	0.349454	0.234367	0.536712	1.14523	0.361132	2.05846
112	3324.44	0.361041	0.279422	0.536712	1.14523	0.361132	2.05846
113	3442.88	0.361041	0.221095	0.536712	1.14523	0.361132	2.05846
114	3561.32	0.361041	0.221095	0.536712	1.14523	0.361132	2.05846
115	3679.76	0.25816	0.151377	0.536712	1.14523	0.361132	2.05846
116	3798.2	0.25816	0.151377	0.536712	1.14523	0.361132	2.05846
117	3916.64	0.361041	0.151377	0.545554	1.19377	0.361132	2.05846
118	4035.08	0.361041	0.151377	0.668303	1.19377	0.361132	2.05846
119	4153.52	0.361041	0.151377	0.606929	1.19377	0.361132	2.05846
120	4271.96	0.37603	0.151377	0.626629	1.19377	0.361132	2.05846
121	4390.4	0.414925	0.151377	0.626629	1.15736	0.361132	2.05846
122	4508.84	0.414925	0.151377	0.626629	1.1695	0.361132	2.05846
123	4627.28	0.414925	0.151377	0.626629	1.19377	0.361132	2.05846
124	4745.72	0.399936	0.151377	0.562602	1.19377	0.361132	2.05846
125	4864.16	0.361041	0.151377	0.651255	1.19377	0.361132	2.05846
126	4982.6	0.361041	0.151377	0.682696	1.19377	0.361132	2.05846
127	5101.03	0.60415	0.256615	0.647878	1.19377	0.361132	2.05846
128	5219.47	0.60415	0.256615	0.677557	1.19377	0.361132	2.05846
129	5337.91	0.60415	0.259407	0.697653	1.19377	0.361132	2.05846
130	5456.35	0.60415	0.259407	0.647878	1.19377	0.361132	2.05846
131	5574.79	0.546966	0.259407	0.819509	1.14523	0.361132	2.05846
132	5693.23	0.53219	0.183799	0.819509	1.1695	0.361132	2.05846
133	5811.67	0.546966	0.259407	0.811052	1.14523	0.361132	2.05846
134	5930.11	0.545049	0.259407	0.80505	1.19377	0.361132	2.05846
135	6048.55	0.545049	0.259407	0.82722	1.14523	0.361132	2.05846
136	6166.99	0.644648	0.259407	0.819509	1.14523	0.361132	2.05846
137	6285.43	0.667887	0.259407	0.895171	1.14523	0.361132	2.05846
138	6403.87	0.667887	0.259407	0.934607	1.19377	0.361132	2.05846
139	6522.31	0.667887	0.259407	0.934607	1.19377	0.361132	2.05846
140	6640.75	0.638336	0.183799	0.934607	1.14523	0.361132	2.05846
141	6759.19	0.697438	0.183799	0.850203	1.19377	0.361132	2.05846
142	6877.63	0.576516	0.183799	0.81223	1.14523	0.361132	2.05846
143	6996.07	0.737009	0.183799	0.948705	1.14523	0.361132	2.05846
144	7114.51	0.67027	0.183799	0.895171	1.19377	0.361132	2.05846
145	7232.95	0.699821	0.277551	0.939915	1.19377	0.361132	2.05846
146	7351.39	0.733514	0.289687	0.939915	1.1695	0.361132	2.05846
147	7469.82	0.699821	0.277551	0.939915	1.19377	0.361132	2.05846
148	7588.26	0.699821	0.277551	0.999411	1.19377	0.361132	2.05846
149	7706.7	0.731796	0.183799	0.999411	1.19377	0.361132	2.05846
150	7825.14	0.70808	0.408194	0.983485	1.19377	0.361132	2.05846
151	7943.58	0.820448	0.408194	1.03211	1.19377	0.361132	2.05846
152	8062.02	0.788473	0.513229	1.03211	1.14523	0.361132	2.05846
153	8180.46	0.756539	0.440414	1.02609	1.14523	0.361132	2.05846
154	8298.9	0.812742	0.440414	1.02609	1.1695	0.361132	2.05846
155	8417.34	0.818024	0.367598	1.25901	1.19377	0.361132	2.05846
156	8535.78	0.802766	0.367598	1.08088	1.1695	0.361132	2.05846
157	8654.22	0.853305	0.367598	1.08088	1.19377	0.361132	2.05846
158	8772.66	0.847575	0.367598	1.03211	1.19377	0.361132	2.05846
159	8891.1	0.870151	0.367598	1.03211	1.19377	0.361132	2.05846
160	9009.54	0.870151	0.367598	1.15084	1.19377	0.361132	2.05846
161	9127.98	0.852935	0.476821	1.23648	1.1695	0.361132	2.05846
162	9246.42	0.886628	0.367598	1.25901	1.19377	0.361132	2.05846
163	9364.86	0.886628	0.440414	1.25674	1.19377	0.361132	2.05846
164	9483.3	0.806242	0.404006	1.25901	1.1695	0.361132	2.05846
165	9601.74	0.886628	0.513229	1.25674	1.19377	0.361132	2.05846
166	9720.18	0.870151	0.367598	1.13646	1.19377	0.361132	2.05846
167	9838.61	0.806242	0.367598	1.19517	1.14523	0.361132	2.05846
168	9948.92	0.806242	0.486363	1.0429	1.19377	0.361132	2.05846
