# Supplementary material for: The rapid developmental rise of somatic inhibition disengages hippocampal dynamics from self-motion
Source: eLife journal article supplement (doi:10.7554/elife.78116), 2022-07-20
Supplement: supp [file data_and_rnd_psth_P8_all_moves_no_cell_type_groups_.xlsx]

## Sheet: Sheet1
	Time	Median_active_cells	Percentile_25	Percentile_75	rnd_Median_active_cells	rnd_Percentile_5	rnd_Percentile_95
0	-9940.78	1.24779	1.03923	1.76834	1.55327	1.05564	2.51952
1	-9822.34	1.31157	1.08193	1.67794	1.55327	1.05564	2.51952
2	-9703.9	1.34835	1.05032	1.59376	1.55327	1.05564	2.51952
3	-9585.46	1.2876	1.09457	1.687	1.55327	1.05564	2.51952
4	-9467.02	1.23994	1.06394	1.59376	1.55327	1.05564	2.51952
5	-9348.58	1.27813	1.05032	1.71473	1.55327	1.05564	2.51952
6	-9230.14	1.27813	0.986545	1.71473	1.55327	1.05564	2.51952
7	-9111.7	1.20791	0.876302	1.70617	1.55327	1.05564	2.51952
8	-8993.26	1.13627	0.92277	1.70617	1.55327	1.05564	2.51952
9	-8874.82	1.20791	0.876302	1.63055	1.55327	1.05564	2.51952
10	-8756.39	1.19742	0.936475	1.63055	1.55327	1.05564	2.51952
11	-8637.95	1.23994	1.01969	1.67523	1.55327	1.05564	2.51952
12	-8519.51	1.17138	0.942297	1.57007	1.55327	1.05564	2.51952
13	-8401.07	1.19742	0.914351	1.38862	1.55327	1.05564	2.51952
14	-8282.63	1.19569	0.892227	1.49537	1.55327	1.05564	2.51952
15	-8164.19	1.2352	0.942297	1.4374	1.55327	1.05564	2.51952
16	-8045.75	1.24161	0.878522	1.373	1.55327	1.05564	2.51952
17	-7927.31	1.20509	0.83687	1.30444	1.55327	1.05564	2.51952
18	-7808.87	1.13486	0.855043	1.35284	1.55327	1.05564	2.51952
19	-7690.43	1.13486	0.954657	1.30444	1.55327	1.05564	2.51952
20	-7571.99	1.1549	0.914351	1.30444	1.55327	1.05564	2.51952
21	-7453.55	0.996624	0.833785	1.28963	1.55327	1.05564	2.51952
22	-7335.11	1.03174	0.833785	1.32995	1.55327	1.05564	2.51952
23	-7216.67	1.03174	0.876302	1.37027	1.55327	1.05564	2.51952
24	-7098.23	1.2065	0.855043	1.38254	1.55327	1.05564	2.51952
25	-6979.79	1.24868	0.767413	1.36827	1.55327	1.05564	2.51952
26	-6861.35	1.13707	0.833785	1.33582	1.55327	1.05564	2.51952
27	-6742.91	1.06685	0.876302	1.33582	1.55327	1.05564	2.51952
28	-6624.47	1.21357	0.876302	1.36827	1.55327	1.05564	2.51952
29	-6506.04	1.10196	0.855043	1.26542	1.55327	1.05564	2.51952
30	-6387.6	1.09277	0.970161	1.34018	1.55327	1.05564	2.51952
31	-6269.16	1.163	0.970161	1.36172	1.55327	1.05564	2.51952
32	-6150.72	1.27718	0.966528	1.31435	1.55327	1.05564	2.51952
33	-6032.28	1.27718	0.977157	1.31435	1.55327	1.05564	2.51952
34	-5913.84	1.12318	0.833785	1.28473	1.55327	1.05564	2.51952
35	-5795.4	1.27718	0.833785	1.33582	1.55327	1.05564	2.51952
36	-5676.96	1.19068	0.833785	1.36172	1.55327	1.05564	2.51952
37	-5558.52	1.12318	0.833785	1.34202	1.55327	1.05564	2.51952
38	-5440.08	1.09549	0.825875	1.41154	1.55327	1.05564	2.51952
39	-5321.64	1.163	0.825875	1.32591	1.55327	1.05564	2.51952
40	-5203.2	1.12318	0.791268	1.31817	1.55327	1.05564	2.51952
41	-5084.76	1.1635	0.791268	1.3062	1.55327	1.05564	2.51952
42	-4966.32	1.12046	0.791268	1.32591	1.55327	1.05564	2.51952
43	-4847.88	1.12318	0.855043	1.3062	1.55327	1.05564	2.51952
44	-4729.44	1.19068	0.833785	1.32591	1.55327	1.05564	2.51952
45	-4611	1.1678	0.833785	1.47772	1.55327	1.05564	2.51952
46	-4492.56	1.19068	0.701041	1.47772	1.55327	1.05564	2.51952
47	-4374.12	1.19068	0.701041	1.47772	1.55327	1.05564	2.51952
48	-4255.68	1.1678	0.701041	1.47772	1.55327	1.05564	2.51952
49	-4137.25	1.19068	0.833785	1.4374	1.55327	1.05564	2.51952
50	-4018.81	1.28379	0.833785	1.42221	1.55327	1.05564	2.51952
51	-3900.37	1.40057	0.833785	1.4374	1.55327	1.05564	2.51952
52	-3781.93	1.29693	0.966528	1.41154	1.55327	1.05564	2.51952
53	-3663.49	1.41858	0.900157	1.52054	1.55327	1.05564	2.51952
54	-3545.05	1.41858	0.833785	1.62867	1.55327	1.05564	2.51952
55	-3426.61	1.41858	0.833785	1.46115	1.55327	1.05564	2.51952
56	-3308.17	1.49021	0.833785	1.68037	1.55327	1.05564	2.51952
57	-3189.73	1.49021	0.833785	1.79619	1.55327	1.05564	2.51952
58	-3071.29	1.56044	0.876302	1.81947	1.55327	1.05564	2.51952
59	-2952.85	1.49021	0.876302	1.67523	1.55327	1.05564	2.51952
60	-2834.41	1.49021	0.942674	1.74506	1.55327	1.05564	2.51952
61	-2715.97	1.49021	0.966528	1.8893	1.55327	1.05564	2.51952
62	-2597.53	1.49021	0.966528	2.05683	1.55327	1.05564	2.51952
63	-2479.09	1.56185	0.966528	1.91987	1.55327	1.05564	2.51952
64	-2360.65	1.52603	0.900157	2.09403	1.55327	1.05564	2.51952
65	-2242.21	1.59766	0.966528	2.04084	1.55327	1.05564	2.51952
66	-2123.77	1.49162	0.966528	2.05683	1.55327	1.05564	2.51952
67	-2005.33	1.52603	0.876302	2.16181	1.55327	1.05564	2.51952
68	-1886.89	1.49021	0.942674	2.04084	1.55327	1.05564	2.51952
69	-1768.46	1.41999	0.833785	2.1855	1.55327	1.05564	2.51952
70	-1650.02	1.52744	0.987787	2.36695	1.55327	1.05564	2.51952
71	-1531.58	1.59766	1.00905	2.24598	1.55327	1.05564	2.51952
72	-1413.14	1.56185	0.987787	2.30647	1.55327	1.05564	2.51952
73	-1294.7	1.56185	1.00905	2.48792	1.55327	1.05564	2.51952
74	-1176.26	1.56185	0.876302	2.24598	1.55327	1.05564	2.51952
75	-1057.82	1.41999	0.986545	2.12501	1.55327	1.05564	2.51952
76	-939.379	1.4558	1.05032	2.04084	1.55327	1.05564	2.51952
77	-820.94	1.49021	1.1141	2.06453	1.55327	1.05564	2.51952
78	-702.5	1.49021	1.05032	2.06453	1.55327	1.05564	2.51952
79	-584.061	1.34835	0.986545	2.02774	1.55327	1.05564	2.51952
80	-465.621	1.4544	0.986545	2.1487	1.55327	1.05564	2.51952
81	-347.182	1.41858	1.04093	2.08822	1.55327	1.05564	2.51952
82	-228.742	1.41858	0.986545	2.24305	1.55327	1.05564	2.51952
83	-110.303	1.41858	1.05156	2.47105	1.55327	1.05564	2.51952
84	8.13687	1.56044	1.20556	2.69906	1.55327	1.05564	2.51952
85	126.576	1.7023	1.35227	2.86658	1.55327	1.05564	2.51952
86	245.016	1.84415	1.60996	3.5506	1.55327	1.05564	2.51952
87	363.455	2.12646	1.80129	4.32773	1.55327	1.05564	2.66332
88	481.895	2.19669	1.84554	5.29089	1.55327	1.05564	2.51952
89	600.334	2.3843	1.95898	5.67707	1.55327	1.05564	2.51952
90	718.774	2.70962	2.28755	5.6538	1.55327	1.05564	2.51952
91	837.213	2.93276	2.36595	5.31109	1.55327	1.05564	2.51952
92	955.653	3.10415	2.21637	4.76505	1.55327	1.05564	2.51952
93	1074.09	3.10415	2.07784	4.03447	1.55327	1.05564	2.51952
94	1192.53	2.7674	1.81186	3.54589	1.55327	1.05564	2.51952
95	1310.97	2.28443	1.66228	3.04246	1.55327	1.05564	2.51952
96	1429.41	2.00262	1.49057	2.60221	1.55327	1.05564	2.51952
97	1547.85	1.63335	1.27748	2.39743	1.55327	1.05564	2.51952
98	1666.29	1.3769	1.17992	2.15026	1.55327	1.05564	2.51952
99	1784.73	1.35973	1.16293	2.03349	1.55327	1.05564	2.51952
100	1903.17	1.22551	0.877407	1.72116	1.55327	1.05564	2.51952
101	2021.61	1.06679	0.737742	1.61705	1.55327	1.05564	2.51952
102	2140.05	0.99657	0.650002	1.40883	1.55327	1.05564	2.51952
103	2258.49	0.926399	0.569464	1.21512	1.55327	1.05564	2.51952
104	2376.93	0.800644	0.647653	1.11643	1.55327	1.05564	2.51952
105	2495.37	0.793601	0.627137	1.05662	1.55327	1.05564	2.51952
106	2613.81	0.687824	0.550767	0.942824	1.55327	1.05564	2.51952
107	2732.25	0.687824	0.550767	0.982696	1.55327	1.05564	2.51952
108	2850.68	0.687824	0.550767	0.902951	1.55327	1.05564	2.51952
109	2969.12	0.687824	0.476881	0.902951	1.55327	1.05564	2.51952
110	3087.56	0.687824	0.470353	0.902951	1.55327	1.05564	2.51952
111	3206	0.687824	0.522909	0.819325	1.55327	1.05564	2.51952
112	3324.44	0.687824	0.522909	0.730335	1.55327	1.05564	2.51952
113	3442.88	0.687824	0.550767	0.730335	1.55327	1.05564	2.51952
114	3561.32	0.65905	0.599437	0.703677	1.55327	1.05564	2.51952
115	3679.76	0.641329	0.499037	0.715725	1.55327	1.05564	2.51952
116	3798.2	0.605512	0.519198	0.680612	1.55327	1.05564	2.51952
117	3916.64	0.65568	0.519198	0.723677	1.55327	1.05564	2.51952
118	4035.08	0.65568	0.519198	0.846922	1.55327	1.05564	2.51952
119	4153.52	0.694867	0.519198	0.843873	1.55327	1.05564	2.51952
120	4271.96	0.783782	0.599437	0.989885	1.55327	1.05564	2.51952
121	4390.4	0.740328	0.605731	1.00467	1.55327	1.05564	2.51952
122	4508.84	0.743929	0.611212	1.00467	1.55327	1.05564	2.51952
123	4627.28	0.824574	0.611212	1.01268	1.55327	1.05564	2.51952
124	4745.72	0.784252	0.618134	1.01268	1.55327	1.05564	2.51952
125	4864.16	0.834995	0.618134	1.01268	1.55327	1.05564	2.51952
126	4982.6	0.79761	0.646303	1.01234	1.55327	1.05564	2.51952
127	5101.03	0.931552	0.691403	1.22961	1.55327	1.05564	2.51952
128	5219.47	0.933236	0.764766	1.16912	1.55327	1.05564	2.51952
129	5337.91	0.890719	0.771576	1.28963	1.55327	1.05564	2.51952
130	5456.35	1.13673	0.834274	1.31435	1.55327	1.05564	2.51952
131	5574.79	1.12046	0.706723	1.30444	1.55327	1.05564	2.51952
132	5693.23	1.12631	0.669694	1.29293	1.55327	1.05564	2.51952
133	5811.67	1.06464	0.701041	1.29363	1.55327	1.05564	2.51952
134	5930.11	1.06464	0.701041	1.30444	1.55327	1.05564	2.51952
135	6048.55	1.2065	0.642947	1.41333	1.55327	1.05564	2.51952
136	6166.99	1.13627	0.701041	1.45365	1.55327	1.05564	2.51952
137	6285.43	1.16497	0.833785	1.51805	1.55327	1.05564	2.51952
138	6403.87	1.20791	0.701041	1.70617	1.55327	1.05564	2.51952
139	6522.31	1.20791	0.792622	1.7465	1.55327	1.05564	2.51952
140	6640.75	1.1415	0.764766	1.70617	1.55327	1.05564	2.51952
141	6759.19	1.1415	0.764766	1.63055	1.55327	1.05564	2.51952
142	6877.63	1.26235	0.809014	1.63055	1.55327	1.05564	2.51952
143	6996.07	1.27954	0.814746	1.70617	1.55327	1.05564	2.51952
144	7114.51	1.16497	0.876302	1.58517	1.55327	1.05564	2.51952
145	7232.95	1.1836	0.958598	1.6255	1.55327	1.05564	2.51952
146	7351.39	1.29817	0.936475	1.63055	1.55327	1.05564	2.51952
147	7469.82	1.27954	0.92277	1.63055	1.55327	1.05564	2.51952
148	7588.26	1.27954	0.890882	1.70617	1.55327	1.05564	2.51952
149	7706.7	1.24731	0.949945	1.7465	1.55327	1.05564	2.51952
150	7825.14	1.20306	0.848429	1.95666	1.55327	1.05564	2.51952
151	7943.58	1.24731	1.01109	1.95666	1.55327	1.05564	2.51952
152	8062.02	1.24731	1.01109	2.03935	1.55327	1.05564	2.51952
153	8180.46	1.3358	1.01109	1.95666	1.55327	1.05564	2.51952
154	8298.9	1.3358	1.03976	2.03935	1.55327	1.05564	2.51952
155	8417.34	1.3358	1.12109	2.07967	1.55327	1.05564	2.51952
156	8535.78	1.28245	1.17499	2.03935	1.55327	1.05564	2.51952
157	8654.22	1.32497	1.17499	2.28277	1.55327	1.05564	2.51952
158	8772.66	1.32497	1.19255	2.46629	1.55327	1.05564	2.51952
159	8891.1	1.32497	1.10818	2.28277	1.55327	1.05564	2.51952
160	9009.54	1.32497	1.10818	2.29876	1.55327	1.05564	2.51952
161	9127.98	1.32497	1.25777	2.17779	1.55327	1.05564	2.51952
162	9246.42	1.35409	1.2101	2.20107	1.55327	1.05564	2.51952
163	9364.86	1.3966	1.25777	2.29876	1.55327	1.05564	2.51952
164	9483.3	1.3966	1.25777	2.29876	1.55327	1.05564	2.51952
165	9601.74	1.56667	1.2101	2.27549	1.55327	1.05564	2.51952
166	9720.18	1.48834	1.21352	2.20107	1.55327	1.05564	2.51952
167	9838.61	1.52416	1.21352	2.17779	1.55327	1.05564	2.51952
168	9948.92	1.47996	1.08185	2.07543	1.55327	1.05564	2.51952
