# Supplementary material for: The rapid developmental rise of somatic inhibition disengages hippocampal dynamics from self-motion
Source: eLife journal article supplement (doi:10.7554/elife.78116), 2022-07-20
Supplement: supp [file data_and_rnd_psth_P9_all_moves_no_cell_type_groups_.xlsx]

## Sheet: Sheet1
	Time	Median_active_cells	Percentile_25	Percentile_75	rnd_Median_active_cells	rnd_Percentile_5	rnd_Percentile_95
0	-9940.78	0.492005	0.390039	0.874368	0.752823	0.583565	1.32804
1	-9822.34	0.502874	0.394107	0.874368	0.752823	0.583565	1.32804
2	-9703.9	0.501882	0.393242	0.874368	0.752823	0.583565	1.33871
3	-9585.46	0.501882	0.393242	0.874368	0.752823	0.583565	1.32804
4	-9467.02	0.501882	0.393242	0.800051	0.752823	0.583565	1.33871
5	-9348.58	0.530786	0.415517	0.800051	0.752823	0.583565	1.33871
6	-9230.14	0.627353	0.415517	0.932326	0.752823	0.583565	1.33871
7	-9111.7	0.615006	0.47717	0.874368	0.752823	0.583565	1.32804
8	-8993.26	0.615006	0.441251	0.874368	0.752823	0.583565	1.33871
9	-8874.82	0.627353	0.491126	0.932326	0.752823	0.583565	1.33871
10	-8756.39	0.6	0.441251	0.932326	0.752823	0.583565	1.32804
11	-8637.95	0.615006	0.476675	0.933261	0.752823	0.583565	1.32804
12	-8519.51	0.530786	0.471736	0.932326	0.752823	0.583565	1.32804
13	-8401.07	0.553506	0.475734	1.05914	0.752823	0.583565	1.32804
14	-8282.63	0.6	0.471736	0.932326	0.752823	0.583565	1.32804
15	-8164.19	0.615006	0.475734	0.932326	0.752823	0.583565	1.32804
16	-8045.75	0.615006	0.441251	0.932326	0.752823	0.583565	1.33871
17	-7927.31	0.537634	0.476675	0.836604	0.752823	0.583565	1.33871
18	-7808.87	0.537634	0.476675	0.979101	0.752823	0.583565	1.33871
19	-7690.43	0.615006	0.476675	0.853226	0.752823	0.583565	1.32804
20	-7571.99	0.530786	0.471736	0.929101	0.752823	0.583565	1.33871
21	-7453.55	0.501882	0.464587	0.796825	0.752823	0.583565	1.33871
22	-7335.11	0.677201	0.484856	0.803226	0.752823	0.583565	1.33871
23	-7216.67	0.537634	0.496943	0.846825	0.752823	0.583565	1.32804
24	-7098.23	0.677201	0.516334	0.803226	0.752823	0.583565	1.32804
25	-6979.79	0.615006	0.515491	0.753226	0.752823	0.583565	1.32804
26	-6861.35	0.6	0.510553	0.854693	0.752823	0.583565	1.32804
27	-6742.91	0.6	0.510553	0.826476	0.752823	0.583565	1.33871
28	-6624.47	0.627353	0.476864	0.803226	0.752823	0.583565	1.32804
29	-6506.04	0.627353	0.458317	0.853226	0.752823	0.583565	1.32804
30	-6387.6	0.529101	0.458317	0.703226	0.752823	0.583565	1.32804
31	-6269.16	0.529101	0.475734	0.710729	0.752823	0.583565	1.32804
32	-6150.72	0.530786	0.441251	0.753226	0.752823	0.583565	1.32804
33	-6032.28	0.615006	0.441251	0.800051	0.752823	0.583565	1.33871
34	-5913.84	0.5	0.40052	0.800051	0.752823	0.583565	1.32804
35	-5795.4	0.6	0.40052	0.732847	0.752823	0.583565	1.32804
36	-5676.96	0.615006	0.438048	0.746825	0.752823	0.583565	1.33871
37	-5558.52	0.615006	0.438048	0.803226	0.752823	0.583565	1.32804
38	-5440.08	0.6	0.441251	0.800051	0.752823	0.583565	1.32804
39	-5321.64	0.6	0.347441	0.800051	0.752823	0.583565	1.33871
40	-5203.2	0.6	0.328536	0.800051	0.752823	0.583565	1.33871
41	-5084.76	0.501882	0.427831	0.800051	0.752823	0.583565	1.32804
42	-4966.32	0.501882	0.441251	0.800051	0.752823	0.583565	1.32804
43	-4847.88	0.529101	0.427831	0.710729	0.752823	0.583565	1.32804
44	-4729.44	0.431034	0.388206	0.710729	0.752823	0.583565	1.32804
45	-4611	0.451467	0.347441	0.710729	0.752823	0.583565	1.32804
46	-4492.56	0.492005	0.388206	0.741826	0.752823	0.583565	1.32804
47	-4374.12	0.451467	0.388206	0.667776	0.752823	0.583565	1.32804
48	-4255.68	0.492005	0.403723	0.667776	0.752823	0.583565	1.32804
49	-4137.25	0.529101	0.413939	0.703226	0.752823	0.583565	1.32804
50	-4018.81	0.492005	0.403723	0.736828	0.752823	0.583565	1.32804
51	-3900.37	0.451467	0.388206	0.690582	0.752823	0.583565	1.32804
52	-3781.93	0.529101	0.309972	0.703226	0.752823	0.583565	1.32804
53	-3663.49	0.431034	0.353802	0.803226	0.752823	0.583565	1.32804
54	-3545.05	0.492005	0.365931	0.853226	0.752823	0.583565	1.32804
55	-3426.61	0.431034	0.284706	0.803226	0.752823	0.583565	1.32804
56	-3308.17	0.492005	0.365931	0.921143	0.752823	0.583565	1.32804
57	-3189.73	0.492005	0.365931	0.941573	0.752823	0.583565	1.32804
58	-3071.29	0.492005	0.41966	0.807164	0.752823	0.583565	1.32804
59	-2952.85	0.473934	0.403723	0.874368	0.752823	0.583565	1.32804
60	-2834.41	0.473934	0.403723	0.874368	0.752823	0.583565	1.32804
61	-2715.97	0.529101	0.372708	0.874368	0.752823	0.583565	1.32804
62	-2597.53	0.529101	0.395552	0.830338	0.752823	0.583565	1.32804
63	-2479.09	0.529101	0.413939	0.830338	0.752823	0.583565	1.32804
64	-2360.65	0.529101	0.372708	0.902177	0.752823	0.583565	1.32804
65	-2242.21	0.592417	0.471736	0.815476	0.752823	0.583565	1.32804
66	-2123.77	0.651659	0.471736	0.815476	0.752823	0.583565	1.32804
67	-2005.33	0.7109	0.410235	0.874368	0.752823	0.583565	1.32804
68	-1886.89	0.574713	0.471736	0.856214	0.752823	0.583565	1.32804
69	-1768.46	0.574713	0.438048	0.933261	0.752823	0.583565	1.33871
70	-1650.02	0.7109	0.438048	0.933261	0.752823	0.583565	1.33871
71	-1531.58	0.592417	0.458317	0.889231	0.752823	0.583565	1.33871
72	-1413.14	0.651659	0.438048	0.926861	0.752823	0.583565	1.33871
73	-1294.7	0.651659	0.471736	0.889231	0.752823	0.583565	1.33871
74	-1176.26	0.7109	0.438048	0.867968	0.752823	0.583565	1.32804
75	-1057.82	0.574713	0.438048	0.926861	0.752823	0.583565	1.32804
76	-939.379	0.537634	0.438048	0.889231	0.752823	0.583565	1.32804
77	-820.94	0.718391	0.438048	0.944727	0.752823	0.583565	1.32804
78	-702.5	0.793651	0.624588	1.00397	0.752823	0.583565	1.32804
79	-584.061	0.806452	0.641036	0.974348	0.752823	0.583565	1.33871
80	-465.621	0.806452	0.57151	0.981503	0.752823	0.583565	1.33871
81	-347.182	0.806452	0.605198	1.11803	0.752823	0.583565	1.32804
82	-228.742	0.793651	0.605198	1.06286	0.752823	0.583565	1.32804
83	-110.303	0.806452	0.631074	1.17692	0.752823	0.583565	1.32804
84	8.13687	0.829384	0.584603	1.17692	0.752823	0.583565	1.32804
85	126.576	0.947867	0.738538	1.3092	0.752823	0.583565	1.32804
86	245.016	0.902935	0.666698	1.33342	0.752823	0.583565	1.32804
87	363.455	0.829384	0.621179	1.3092	0.752823	0.583565	1.32804
88	481.895	0.752823	0.694051	1.49365	0.752823	0.583565	1.32804
89	600.334	0.878294	0.605188	1.51317	0.752823	0.583565	1.32804
90	718.774	1	0.603993	1.43765	0.752823	0.583565	1.33871
91	837.213	1.1	0.748976	1.33407	0.752823	0.583565	1.32804
92	955.653	1.25471	0.774776	1.3272	0.752823	0.583565	1.33871
93	1074.09	1.17786	0.76065	1.48363	0.752823	0.583565	1.32804
94	1192.53	0.955414	0.726713	1.4272	0.752823	0.583565	1.32804
95	1310.97	0.955414	0.771445	1.29402	0.752823	0.583565	1.32804
96	1429.41	0.955414	0.712552	1.13605	0.752823	0.583565	1.32804
97	1547.85	0.861009	0.712552	1.11462	0.752823	0.583565	1.33871
98	1666.29	0.878294	0.58182	0.977707	0.752823	0.583565	1.33871
99	1784.73	0.857143	0.522928	0.916854	0.752823	0.583565	1.33871
100	1903.17	0.761905	0.451089	0.890614	0.752823	0.583565	1.32804
101	2021.61	0.677201	0.487008	0.80104	0.752823	0.583565	1.32804
102	2140.05	0.615006	0.521286	0.747961	0.752823	0.583565	1.32804
103	2258.49	0.564334	0.451089	0.694883	0.752823	0.583565	1.32804
104	2376.93	0.6	0.451089	0.632148	0.752823	0.583565	1.32804
105	2495.37	0.471143	0.390476	0.595843	0.752823	0.583565	1.32804
106	2613.81	0.530786	0.278087	0.601967	0.752823	0.583565	1.33871
107	2732.25	0.451467	0.278087	0.601967	0.752823	0.583565	1.32804
108	2850.68	0.47619	0.278087	0.601967	0.752823	0.583565	1.32804
109	2969.12	0.47619	0.278087	0.601967	0.752823	0.583565	1.32804
110	3087.56	0.47619	0.355992	0.601967	0.752823	0.583565	1.33871
111	3206	0.537634	0.381614	0.621179	0.752823	0.583565	1.33871
112	3324.44	0.571429	0.330798	0.69161	0.752823	0.583565	1.32804
113	3442.88	0.530786	0.298081	0.753968	0.752823	0.583565	1.32804
114	3561.32	0.530786	0.256545	0.777778	0.752823	0.583565	1.32804
115	3679.76	0.530786	0.262162	0.777778	0.752823	0.583565	1.33871
116	3798.2	0.615006	0.262162	0.800051	0.752823	0.583565	1.32804
117	3916.64	0.530786	0.20292	0.825397	0.752823	0.583565	1.32804
118	4035.08	0.530786	0.232541	0.891534	0.752823	0.583565	1.33871
119	4153.52	0.530786	0.292465	0.957672	0.752823	0.583565	1.32804
120	4271.96	0.627353	0.256545	0.981481	0.752823	0.583565	1.32804
121	4390.4	0.530786	0.256545	0.800051	0.752823	0.583565	1.32804
122	4508.84	0.627353	0.262162	0.800051	0.752823	0.583565	1.32804
123	4627.28	0.615006	0.298081	0.800051	0.752823	0.583565	1.32804
124	4745.72	0.627353	0.262162	0.93446	0.752823	0.583565	1.32804
125	4864.16	0.627353	0.262162	0.867256	0.752823	0.583565	1.32804
126	4982.6	0.615006	0.298081	0.932326	0.752823	0.583565	1.32804
127	5101.03	0.615006	0.298081	0.800051	0.752823	0.583565	1.32804
128	5219.47	0.615006	0.330798	0.866189	0.752823	0.583565	1.32804
129	5337.91	0.615006	0.334001	0.932326	0.752823	0.583565	1.32804
130	5456.35	0.615006	0.334001	0.932326	0.752823	0.583565	1.32804
131	5574.79	0.615006	0.334001	0.932326	0.752823	0.583565	1.32804
132	5693.23	0.615006	0.334001	0.932326	0.752823	0.583565	1.32804
133	5811.67	0.615006	0.334001	0.932326	0.752823	0.583565	1.32804
134	5930.11	0.492005	0.360418	0.800051	0.752823	0.583565	1.33871
135	6048.55	0.636943	0.334001	0.932326	0.752823	0.583565	1.33871
136	6166.99	0.615006	0.443118	0.932326	0.752823	0.583565	1.32804
137	6285.43	0.615006	0.443118	0.932326	0.752823	0.583565	1.32804
138	6403.87	0.530786	0.334001	0.933261	0.752823	0.583565	1.32804
139	6522.31	0.627353	0.334001	0.932326	0.752823	0.583565	1.32804
140	6640.75	0.615006	0.330798	0.932326	0.752823	0.583565	1.33871
141	6759.19	0.627353	0.330798	0.933261	0.752823	0.583565	1.32804
142	6877.63	0.627353	0.360418	0.933261	0.752823	0.583565	1.32804
143	6996.07	0.615006	0.330798	0.962708	0.752823	0.583565	1.32804
144	7114.51	0.574713	0.330798	0.933261	0.752823	0.583565	1.32804
145	7232.95	0.574713	0.390039	0.932326	0.752823	0.583565	1.32804
146	7351.39	0.574713	0.428666	0.999531	0.752823	0.583565	1.32804
147	7469.82	0.615006	0.443118	0.932326	0.752823	0.583565	1.32804
148	7588.26	0.615006	0.443118	0.877	0.752823	0.583565	1.32804
149	7706.7	0.574713	0.390039	0.784819	0.752823	0.583565	1.32804
150	7825.14	0.615006	0.443118	0.840766	0.752823	0.583565	1.32804
151	7943.58	0.615006	0.443118	0.830338	0.752823	0.583565	1.32804
152	8062.02	0.615006	0.50236	0.874368	0.752823	0.583565	1.32804
153	8180.46	0.574713	0.50236	0.784819	0.752823	0.583565	1.32804
154	8298.9	0.738007	0.53198	0.874368	0.752823	0.583565	1.32804
155	8417.34	0.615006	0.50236	0.874368	0.752823	0.583565	1.32804
156	8535.78	0.615006	0.50236	0.874368	0.752823	0.583565	1.32804
157	8654.22	0.627353	0.524323	0.874368	0.752823	0.583565	1.32804
158	8772.66	0.615006	0.552749	0.874368	0.752823	0.583565	1.33871
159	8891.1	0.627353	0.552749	0.874368	0.752823	0.583565	1.32804
160	9009.54	0.636943	0.538297	0.874368	0.752823	0.583565	1.32804
161	9127.98	0.615006	0.516334	0.874368	0.752823	0.583565	1.32804
162	9246.42	0.615006	0.552749	0.874368	0.752823	0.583565	1.32804
163	9364.86	0.636943	0.583565	0.933261	0.752823	0.583565	1.33871
164	9483.3	0.592417	0.547701	0.933261	0.752823	0.583565	1.32804
165	9601.74	0.636943	0.594859	0.874368	0.752823	0.583565	1.33871
166	9720.18	0.627353	0.587356	0.874368	0.752823	0.583565	1.32804
167	9838.61	0.615006	0.54756	0.933261	0.752823	0.583565	1.33871
168	9948.92	0.574713	0.485844	0.874368	0.752823	0.583565	1.32804
