# Supplementary material for: The rapid developmental rise of somatic inhibition disengages hippocampal dynamics from self-motion
Source: eLife journal article supplement (doi:10.7554/elife.78116), 2022-07-20
Supplement: supp [file data_and_rnd_psth_P10_all_moves_no_cell_type_groups_.xlsx]

## Sheet: Sheet1
	Time	Median_active_cells	Percentile_25	Percentile_75	rnd_Median_active_cells	rnd_Percentile_5	rnd_Percentile_95
0	-9940.78	1.44033	0.617284	2.26337	1.23457	0.617284	2.26337
1	-9822.34	1.44033	0.617284	2.05761	1.23457	0.617284	2.26337
2	-9703.9	1.44033	0.617284	2.05761	1.23457	0.617284	2.26337
3	-9585.46	1.44033	0.617284	2.16049	1.23457	0.617284	2.26337
4	-9467.02	1.44033	0.617284	2.16049	1.23457	0.617284	2.26337
5	-9348.58	1.23457	0.617284	2.26337	1.23457	0.617284	2.26337
6	-9230.14	1.23457	0.617284	2.05761	1.23457	0.617284	2.26337
7	-9111.7	1.02881	0.617284	1.85185	1.23457	0.617284	2.26337
8	-8993.26	1.23457	0.617284	1.64609	1.23457	0.617284	2.26337
9	-8874.82	1.02881	0.617284	1.95473	1.23457	0.617284	2.26337
10	-8756.39	1.02881	0.617284	1.85185	1.23457	0.617284	2.26337
11	-8637.95	1.23457	0.617284	1.74897	1.23457	0.617284	2.26337
12	-8519.51	1.23457	0.617284	1.85185	1.23457	0.617284	2.26337
13	-8401.07	1.02881	0.617284	1.74897	1.23457	0.617284	2.26337
14	-8282.63	1.02881	0.514403	1.85185	1.23457	0.617284	2.26337
15	-8164.19	1.02881	0.514403	1.74897	1.23457	0.617284	2.26337
16	-8045.75	1.23457	0.411523	1.85185	1.23457	0.617284	2.26337
17	-7927.31	1.23457	0.411523	1.85185	1.23457	0.617284	2.26337
18	-7808.87	1.23457	0.411523	1.85185	1.23457	0.617284	2.26337
19	-7690.43	1.02881	0.308642	1.85185	1.23457	0.617284	2.26337
20	-7571.99	1.02881	0.205761	1.85185	1.23457	0.617284	2.26337
21	-7453.55	1.02881	0.308642	2.05761	1.23457	0.617284	2.26337
22	-7335.11	0.823045	0.205761	1.85185	1.23457	0.617284	2.26337
23	-7216.67	1.02881	0.205761	1.85185	1.23457	0.617284	2.26337
24	-7098.23	1.02881	0.205761	1.85185	1.23457	0.617284	2.26337
25	-6979.79	0.823045	0.205761	2.05761	1.23457	0.617284	2.26337
26	-6861.35	0.823045	0.205761	1.74897	1.23457	0.617284	2.26337
27	-6742.91	0.823045	0.411523	1.64609	1.23457	0.617284	2.26337
28	-6624.47	0.823045	0.308642	1.85185	1.23457	0.617284	2.26337
29	-6506.04	0.823045	0.205761	1.64609	1.23457	0.617284	2.26337
30	-6387.6	0.823045	0.205761	1.64609	1.23457	0.617284	2.26337
31	-6269.16	0.823045	0.308642	1.74897	1.23457	0.617284	2.26337
32	-6150.72	0.823045	0.411523	1.85185	1.23457	0.617284	2.26337
33	-6032.28	0.823045	0.205761	1.64609	1.23457	0.617284	2.26337
34	-5913.84	0.617284	0.308642	1.54321	1.23457	0.617284	2.26337
35	-5795.4	0.823045	0.411523	1.44033	1.23457	0.617284	2.26337
36	-5676.96	0.823045	0.205761	1.64609	1.23457	0.617284	2.26337
37	-5558.52	0.823045	0.205761	2.05761	1.23457	0.617284	2.26337
38	-5440.08	0.823045	0.308642	1.95473	1.23457	0.617284	2.26337
39	-5321.64	0.823045	0.205761	1.85185	1.23457	0.617284	2.26337
40	-5203.2	0.823045	0.411523	1.85185	1.23457	0.617284	2.26337
41	-5084.76	1.02881	0.411523	1.85185	1.23457	0.617284	2.26337
42	-4966.32	0.823045	0.411523	1.64609	1.23457	0.617284	2.26337
43	-4847.88	0.823045	0.411523	1.85185	1.23457	0.617284	2.26337
44	-4729.44	1.02881	0.411523	1.74897	1.23457	0.617284	2.26337
45	-4611	0.823045	0.411523	1.64609	1.23457	0.617284	2.26337
46	-4492.56	0.823045	0.411523	1.74897	1.23457	0.617284	2.26337
47	-4374.12	0.823045	0.411523	1.64609	1.23457	0.617284	2.26337
48	-4255.68	0.823045	0.514403	1.64609	1.23457	0.617284	2.26337
49	-4137.25	0.823045	0.411523	1.85185	1.23457	0.617284	2.26337
50	-4018.81	0.823045	0.411523	1.85185	1.23457	0.617284	2.26337
51	-3900.37	1.02881	0.411523	1.85185	1.23457	0.617284	2.26337
52	-3781.93	0.823045	0.411523	1.85185	1.23457	0.617284	2.26337
53	-3663.49	0.823045	0.411523	1.85185	1.23457	0.617284	2.26337
54	-3545.05	1.02881	0.411523	1.44033	1.23457	0.617284	2.26337
55	-3426.61	1.23457	0.411523	1.64609	1.23457	0.617284	2.26337
56	-3308.17	1.02881	0.514403	1.85185	1.23457	0.617284	2.26337
57	-3189.73	1.02881	0.411523	1.85185	1.23457	0.617284	2.26337
58	-3071.29	1.02881	0.514403	1.64609	1.23457	0.617284	2.26337
59	-2952.85	1.23457	0.411523	1.64609	1.23457	0.617284	2.26337
60	-2834.41	1.23457	0.411523	1.74897	1.23457	0.617284	2.26337
61	-2715.97	1.02881	0.411523	1.85185	1.44033	0.617284	2.26337
62	-2597.53	1.23457	0.617284	1.85185	1.23457	0.617284	2.26337
63	-2479.09	1.44033	0.617284	2.05761	1.23457	0.617284	2.26337
64	-2360.65	1.23457	0.617284	1.95473	1.23457	0.617284	2.26337
65	-2242.21	1.23457	0.617284	1.95473	1.23457	0.617284	2.26337
66	-2123.77	1.44033	0.617284	1.95473	1.23457	0.617284	2.26337
67	-2005.33	1.44033	0.411523	2.05761	1.23457	0.617284	2.26337
68	-1886.89	1.44033	0.617284	2.26337	1.23457	0.617284	2.26337
69	-1768.46	1.44033	0.617284	2.26337	1.23457	0.617284	2.26337
70	-1650.02	1.44033	0.720165	2.26337	1.23457	0.617284	2.26337
71	-1531.58	1.64609	0.823045	2.26337	1.23457	0.617284	2.26337
72	-1413.14	1.54321	1.02881	1.90329	1.23457	0.617284	2.26337
73	-1294.7	1.44033	0.977366	2.26337	1.23457	0.617284	2.26337
74	-1176.26	1.64609	0.823045	2.31481	1.33745	0.617284	2.26337
75	-1057.82	1.33745	0.823045	2.46914	1.23457	0.617284	2.26337
76	-939.379	1.44033	0.977366	2.10905	1.23457	0.617284	2.26337
77	-820.94	1.64609	1.02881	2.26337	1.23457	0.617284	2.26337
78	-702.5	1.64609	1.02881	2.31481	1.23457	0.617284	2.26337
79	-584.061	1.64609	1.02881	2.31481	1.23457	0.617284	2.26337
80	-465.621	1.74897	1.02881	2.6749	1.23457	0.617284	2.26337
81	-347.182	1.64609	1.02881	2.52058	1.23457	0.617284	2.26337
82	-228.742	1.64609	1.02881	2.6749	1.23457	0.617284	2.26337
83	-110.303	1.85185	1.02881	2.6749	1.23457	0.617284	2.26337
84	8.13687	2.05761	1.38889	2.88066	1.23457	0.617284	2.26337
85	126.576	2.46914	1.85185	3.13786	1.33745	0.617284	2.26337
86	245.016	2.46914	2.05761	3.08642	1.23457	0.617284	2.26337
87	363.455	2.6749	2.05761	3.08642	1.23457	0.617284	2.26337
88	481.895	2.46914	2.05761	3.08642	1.23457	0.617284	2.26337
89	600.334	2.26337	1.64609	2.6749	1.28601	0.617284	2.26337
90	718.774	1.95473	1.23457	2.26337	1.33745	0.617284	2.26337
91	837.213	1.44033	0.977366	2.05761	1.23457	0.617284	2.26337
92	955.653	1.23457	0.823045	1.85185	1.33745	0.617284	2.26337
93	1074.09	1.02881	0.617284	1.44033	1.33745	0.617284	2.26337
94	1192.53	0.823045	0.617284	1.44033	1.33745	0.617284	2.26337
95	1310.97	0.617284	0.411523	1.23457	1.33745	0.617284	2.26337
96	1429.41	0.617284	0.411523	1.02881	1.23457	0.617284	2.26337
97	1547.85	0.617284	0.411523	0.823045	1.28601	0.617284	2.26337
98	1666.29	0.617284	0.205761	0.823045	1.23457	0.617284	2.26337
99	1784.73	0.411523	0.205761	0.617284	1.33745	0.617284	2.26337
100	1903.17	0.411523	0.205761	0.617284	1.33745	0.617284	2.26337
101	2021.61	0.205761	0.154321	0.617284	1.23457	0.617284	2.26337
102	2140.05	0.411523	0	0.617284	1.33745	0.617284	2.26337
103	2258.49	0.205761	0	0.617284	1.23457	0.617284	2.26337
104	2376.93	0.205761	0	0.617284	1.33745	0.617284	2.26337
105	2495.37	0.205761	0	0.617284	1.23457	0.617284	2.26337
106	2613.81	0.205761	0	0.617284	1.23457	0.617284	2.26337
107	2732.25	0.205761	0	0.617284	1.23457	0.617284	2.26337
108	2850.68	0.205761	0	0.617284	1.23457	0.617284	2.26337
109	2969.12	0.205761	0	0.617284	1.33745	0.617284	2.26337
110	3087.56	0.205761	0	0.411523	1.23457	0.617284	2.26337
111	3206	0.205761	0	0.411523	1.23457	0.617284	2.26337
112	3324.44	0.205761	0	0.617284	1.23457	0.617284	2.26337
113	3442.88	0.205761	0	0.617284	1.23457	0.617284	2.26337
114	3561.32	0.205761	0	0.617284	1.33745	0.617284	2.26337
115	3679.76	0.308642	0	0.823045	1.33745	0.617284	2.26337
116	3798.2	0.411523	0	1.02881	1.33745	0.617284	2.26337
117	3916.64	0.514403	0	0.823045	1.23457	0.617284	2.26337
118	4035.08	0.411523	0.154321	1.02881	1.23457	0.617284	2.26337
119	4153.52	0.617284	0.205761	1.02881	1.23457	0.617284	2.26337
120	4271.96	0.411523	0.205761	0.823045	1.23457	0.617284	2.26337
121	4390.4	0.617284	0.205761	1.02881	1.23457	0.617284	2.26337
122	4508.84	0.617284	0.205761	1.23457	1.23457	0.617284	2.26337
123	4627.28	0.617284	0.205761	1.08025	1.23457	0.617284	2.26337
124	4745.72	0.617284	0.205761	1.23457	1.23457	0.617284	2.26337
125	4864.16	0.823045	0.360082	1.23457	1.33745	0.617284	2.26337
126	4982.6	0.823045	0.411523	1.23457	1.33745	0.617284	2.26337
127	5101.03	0.925926	0.411523	1.23457	1.33745	0.617284	2.26337
128	5219.47	0.925926	0.617284	1.44033	1.33745	0.617284	2.26337
129	5337.91	1.02881	0.617284	1.49177	1.33745	0.617284	2.26337
130	5456.35	0.823045	0.565844	1.64609	1.23457	0.617284	2.26337
131	5574.79	0.823045	0.411523	1.49177	1.23457	0.617284	2.26337
132	5693.23	1.02881	0.411523	1.64609	1.33745	0.617284	2.26337
133	5811.67	1.02881	0.617284	1.64609	1.33745	0.617284	2.26337
134	5930.11	1.23457	0.617284	1.64609	1.33745	0.617284	2.26337
135	6048.55	1.23457	0.771605	1.85185	1.23457	0.617284	2.26337
136	6166.99	1.23457	0.617284	1.85185	1.23457	0.617284	2.26337
137	6285.43	1.23457	0.617284	2.05761	1.23457	0.617284	2.26337
138	6403.87	1.23457	0.617284	2.05761	1.23457	0.617284	2.26337
139	6522.31	1.44033	0.617284	2.05761	1.23457	0.617284	2.26337
140	6640.75	1.44033	0.771605	2.05761	1.23457	0.617284	2.26337
141	6759.19	1.44033	0.823045	2.05761	1.33745	0.617284	2.26337
142	6877.63	1.44033	1.02881	2.05761	1.33745	0.617284	2.26337
143	6996.07	1.44033	0.823045	2.26337	1.33745	0.617284	2.26337
144	7114.51	1.64609	0.977366	2.26337	1.33745	0.617284	2.26337
145	7232.95	1.44033	0.977366	2.26337	1.33745	0.617284	2.26337
146	7351.39	1.44033	0.823045	2.26337	1.33745	0.617284	2.26337
147	7469.82	1.64609	0.617284	2.31481	1.33745	0.617284	2.26337
148	7588.26	1.44033	0.771605	2.31481	1.33745	0.617284	2.26337
149	7706.7	1.33745	0.617284	2.46914	1.23457	0.617284	2.26337
150	7825.14	1.44033	0.617284	2.26337	1.33745	0.617284	2.26337
151	7943.58	1.44033	0.617284	2.10905	1.23457	0.617284	2.26337
152	8062.02	1.44033	0.823045	2.05761	1.33745	0.617284	2.26337
153	8180.46	1.44033	0.823045	2.05761	1.23457	0.617284	2.26337
154	8298.9	1.44033	0.823045	2.05761	1.23457	0.617284	2.26337
155	8417.34	1.44033	0.771605	2.05761	1.23457	0.617284	2.26337
156	8535.78	1.44033	0.823045	2.10905	1.33745	0.617284	2.26337
157	8654.22	1.23457	0.823045	2.26337	1.23457	0.617284	2.26337
158	8772.66	1.44033	0.617284	2.05761	1.23457	0.617284	2.26337
159	8891.1	1.44033	0.823045	2.26337	1.28601	0.617284	2.26337
160	9009.54	1.44033	0.823045	2.46914	1.23457	0.617284	2.26337
161	9127.98	1.44033	0.823045	2.31481	1.23457	0.617284	2.26337
162	9246.42	1.44033	0.823045	2.31481	1.33745	0.617284	2.26337
163	9364.86	1.74897	0.771605	2.26337	1.23457	0.617284	2.26337
164	9483.3	1.54321	0.617284	2.26337	1.23457	0.617284	2.26337
165	9601.74	1.64609	0.617284	2.46914	1.23457	0.617284	2.26337
166	9720.18	1.33745	0.720165	2.26337	1.28601	0.617284	2.26337
167	9838.61	1.13169	0.823045	2.05761	1.23457	0.617284	2.26337
168	9948.92	1.33745	0.720165	2.08333	1.23457	0.617284	2.26337
