# Supplementary material for: The rapid developmental rise of somatic inhibition disengages hippocampal dynamics from self-motion
Source: eLife journal article supplement (doi:10.7554/elife.78116), 2022-07-20
Supplement: supp [file data_and_rnd_psth_P11_all_moves_no_cell_type_groups_.xlsx]

## Sheet: Sheet1
	Time	Median_active_cells	Percentile_25	Percentile_75	rnd_Median_active_cells	rnd_Percentile_5	rnd_Percentile_95
0	-9940.78	1.23457	0.396825	2.07231	1.5873	0.881834	2.46914
1	-9822.34	1.23457	0.573192	1.94004	1.5873	0.881834	2.46914
2	-9703.9	1.23457	0.573192	2.1164	1.5873	0.881834	2.46914
3	-9585.46	1.0582	0.705467	1.76367	1.5873	0.881834	2.46914
4	-9467.02	1.23457	0.352734	1.94004	1.5873	0.881834	2.46914
5	-9348.58	1.32275	0.352734	1.89594	1.5873	0.881834	2.46914
6	-9230.14	1.41093	0.705467	2.1164	1.5873	0.873016	2.46914
7	-9111.7	1.49912	0.749559	2.55732	1.5873	0.881834	2.46914
8	-8993.26	1.49912	0.925926	2.1164	1.5873	0.881834	2.46914
9	-8874.82	1.76367	0.881834	2.29277	1.5873	0.881834	2.46914
10	-8756.39	1.5873	0.881834	2.46914	1.5873	0.881834	2.46914
11	-8637.95	1.49912	0.705467	2.42504	1.5873	0.881834	2.46914
12	-8519.51	1.76367	0.705467	2.29277	1.5873	0.881834	2.46914
13	-8401.07	1.5873	0.749559	2.46914	1.5873	0.864198	2.46914
14	-8282.63	1.5873	0.617284	2.6455	1.5873	0.881834	2.46914
15	-8164.19	1.49912	0.881834	2.77778	1.5873	0.881834	2.46914
16	-8045.75	1.5873	0.573192	2.46914	1.5873	0.881834	2.46914
17	-7927.31	1.49912	0.529101	2.46914	1.5873	0.881834	2.46914
18	-7808.87	1.5873	0.705467	2.24868	1.5873	0.881834	2.46914
19	-7690.43	1.67549	0.529101	2.29277	1.5873	0.881834	2.46914
20	-7571.99	1.5873	0.925926	2.24868	1.5873	0.881834	2.46914
21	-7453.55	1.5873	0.705467	2.42504	1.5873	0.881834	2.46914
22	-7335.11	1.41093	0.573192	2.24868	1.5873	0.881834	2.46914
23	-7216.67	1.32275	0.352734	2.24868	1.5873	0.881834	2.46914
24	-7098.23	1.32275	0.440917	1.94004	1.5873	0.881834	2.46914
25	-6979.79	1.41093	0.352734	1.89594	1.5873	0.881834	2.46914
26	-6861.35	1.41093	0.529101	2.07231	1.5873	0.881834	2.46914
27	-6742.91	1.41093	0.705467	2.29277	1.5873	0.881834	2.46914
28	-6624.47	1.76367	0.881834	2.24868	1.5873	0.881834	2.46914
29	-6506.04	1.76367	1.0582	2.60141	1.5873	0.881834	2.46914
30	-6387.6	1.67549	1.0582	2.60141	1.5873	0.881834	2.46914
31	-6269.16	1.76367	1.10229	2.55732	1.5873	0.881834	2.46914
32	-6150.72	1.76367	0.881834	2.60141	1.5873	0.881834	2.46914
33	-6032.28	1.76367	1.0582	2.46914	1.5873	0.881834	2.46914
34	-5913.84	1.67549	1.0582	2.29277	1.5873	0.881834	2.46914
35	-5795.4	1.76367	1.0582	2.24868	1.5873	0.881834	2.46914
36	-5676.96	1.5873	0.881834	2.29277	1.5873	0.881834	2.46914
37	-5558.52	1.76367	0.881834	2.46914	1.5873	0.881834	2.46914
38	-5440.08	1.76367	0.749559	2.60141	1.5873	0.881834	2.38977
39	-5321.64	1.5873	0.881834	2.46914	1.5873	0.881834	2.46914
40	-5203.2	1.5873	0.881834	2.42504	1.5873	0.881834	2.46914
41	-5084.76	1.5873	0.925926	2.24868	1.5873	0.881834	2.46914
42	-4966.32	1.49912	0.881834	2.29277	1.5873	0.881834	2.46914
43	-4847.88	1.49912	0.881834	2.1164	1.5873	0.881834	2.46914
44	-4729.44	1.5873	0.925926	2.29277	1.5873	0.881834	2.46914
45	-4611	1.76367	1.0582	2.46914	1.5873	0.881834	2.46914
46	-4492.56	1.94004	1.10229	2.29277	1.5873	0.881834	2.38977
47	-4374.12	1.76367	1.10229	2.29277	1.5873	0.881834	2.46914
48	-4255.68	1.76367	1.10229	2.29277	1.5873	0.881834	2.46914
49	-4137.25	1.5873	1.10229	2.24868	1.5873	0.881834	2.46914
50	-4018.81	1.5873	0.881834	2.1164	1.5873	0.881834	2.46914
51	-3900.37	1.5873	0.881834	2.29277	1.5873	0.881834	2.46914
52	-3781.93	1.41093	1.0582	2.24868	1.5873	0.881834	2.46914
53	-3663.49	1.5873	1.0582	2.07231	1.5873	0.881834	2.46914
54	-3545.05	1.5873	1.0582	2.07231	1.5873	0.881834	2.46914
55	-3426.61	1.5873	0.881834	2.07231	1.5873	0.881834	2.46914
56	-3308.17	1.49912	1.0582	2.1164	1.5873	0.881834	2.46914
57	-3189.73	1.5873	0.749559	2.24868	1.5873	0.881834	2.46914
58	-3071.29	1.76367	0.749559	2.29277	1.5873	0.881834	2.46914
59	-2952.85	1.76367	0.749559	2.29277	1.5873	0.881834	2.46914
60	-2834.41	1.76367	1.0582	2.42504	1.5873	0.881834	2.46914
61	-2715.97	1.76367	0.881834	2.46914	1.5873	0.881834	2.46914
62	-2597.53	1.76367	0.881834	2.46914	1.5873	0.881834	2.46914
63	-2479.09	1.67549	1.0582	2.60141	1.5873	0.881834	2.46914
64	-2360.65	1.41093	0.925926	2.29277	1.5873	0.881834	2.46914
65	-2242.21	1.49912	1.0582	2.29277	1.5873	0.881834	2.46914
66	-2123.77	1.41093	1.0582	2.1164	1.5873	0.881834	2.46914
67	-2005.33	1.5873	0.881834	2.1164	1.5873	0.881834	2.46914
68	-1886.89	1.5873	0.749559	2.29277	1.5873	0.881834	2.46914
69	-1768.46	1.5873	0.749559	2.46914	1.5873	0.881834	2.46914
70	-1650.02	1.67549	0.881834	2.6455	1.5873	0.881834	2.46914
71	-1531.58	1.67549	0.881834	2.6455	1.5873	0.881834	2.46914
72	-1413.14	1.76367	0.881834	2.6455	1.5873	0.881834	2.46914
73	-1294.7	1.5873	0.705467	2.29277	1.5873	0.881834	2.46914
74	-1176.26	1.41093	1.0582	2.1164	1.5873	0.881834	2.46914
75	-1057.82	1.41093	0.925926	2.07231	1.5873	0.881834	2.46914
76	-939.379	1.5873	0.925926	2.1164	1.5873	0.881834	2.46914
77	-820.94	1.5873	1.0582	2.1164	1.5873	0.881834	2.46914
78	-702.5	1.67549	1.0582	2.29277	1.5873	0.824515	2.46914
79	-584.061	1.5873	1.23457	2.42504	1.5873	0.881834	2.46914
80	-465.621	1.76367	1.10229	2.29277	1.5873	0.881834	2.46914
81	-347.182	1.94004	1.0582	2.46914	1.5873	0.881834	2.46914
82	-228.742	1.94004	1.41093	2.77778	1.5873	0.881834	2.46914
83	-110.303	1.94004	1.5873	2.60141	1.5873	0.881834	2.46914
84	8.13687	1.94004	1.23457	3.1746	1.5873	0.881834	2.46914
85	126.576	2.20459	1.23457	3.30688	1.5873	0.881834	2.43827
86	245.016	2.29277	1.41093	2.99824	1.5873	0.881834	2.46914
87	363.455	2.38095	1.10229	2.99824	1.5873	0.881834	2.46914
88	481.895	1.94004	1.10229	2.6455	1.5873	0.881834	2.46914
89	600.334	1.5873	0.881834	2.46914	1.5873	0.881834	2.46914
90	718.774	1.41093	0.749559	2.07231	1.5873	0.881834	2.46914
91	837.213	1.23457	0.705467	1.5873	1.5873	0.881834	2.46914
92	955.653	1.0582	0.705467	1.5873	1.5873	0.881834	2.46914
93	1074.09	0.970018	0.529101	1.41093	1.5873	0.881834	2.46914
94	1192.53	0.705467	0.352734	1.23457	1.5873	0.881834	2.46914
95	1310.97	0.705467	0.176367	1.23457	1.5873	0.873016	2.46914
96	1429.41	0.617284	0.220459	1.0582	1.5873	0.881834	2.46914
97	1547.85	0.705467	0.176367	1.23457	1.5873	0.881834	2.46914
98	1666.29	0.352734	0.176367	1.19048	1.5873	0.881834	2.46914
99	1784.73	0.352734	0.176367	1.19048	1.5873	0.864198	2.46914
100	1903.17	0.352734	0.0440917	1.23457	1.5873	0.881834	2.46914
101	2021.61	0.352734	0.0440917	1.14638	1.5873	0.881834	2.46914
102	2140.05	0.352734	0	0.837743	1.5873	0.881834	2.46914
103	2258.49	0.176367	0	0.881834	1.5873	0.881834	2.46914
104	2376.93	0.176367	0	0.881834	1.5873	0.881834	2.46914
105	2495.37	0.176367	0	1.01411	1.5873	0.881834	2.46914
106	2613.81	0.176367	0	1.01411	1.5873	0.881834	2.46914
107	2732.25	0.176367	0	1.23457	1.5873	0.881834	2.46914
108	2850.68	0.176367	0	1.01411	1.5873	0.881834	2.46914
109	2969.12	0.176367	0	0.705467	1.5873	0.881834	2.46914
110	3087.56	0.176367	0	0.837743	1.5873	0.881834	2.46914
111	3206	0.176367	0	0.529101	1.5873	0.881834	2.46914
112	3324.44	0.176367	0	0.837743	1.5873	0.881834	2.46914
113	3442.88	0.176367	0	1.32275	1.5873	0.881834	2.46914
114	3561.32	0.176367	0	1.19048	1.5873	0.881834	2.46914
115	3679.76	0.26455	0	1.36684	1.5873	0.881834	2.46914
116	3798.2	0.440917	0.176367	1.23457	1.5873	0.881834	2.46914
117	3916.64	0.881834	0.176367	1.5873	1.5873	0.881834	2.46914
118	4035.08	0.970018	0.176367	1.94004	1.5873	0.881834	2.46914
119	4153.52	0.970018	0.220459	2.07231	1.5873	0.881834	2.46914
120	4271.96	1.0582	0.396825	2.07231	1.5873	0.881834	2.46914
121	4390.4	1.32275	0.529101	1.94004	1.5873	0.881834	2.46914
122	4508.84	1.41093	0.529101	1.94004	1.5873	0.881834	2.46914
123	4627.28	1.41093	0.705467	1.94004	1.5873	0.881834	2.46914
124	4745.72	1.41093	0.749559	2.07231	1.5873	0.881834	2.46914
125	4864.16	1.41093	0.881834	2.24868	1.5873	0.881834	2.46914
126	4982.6	1.67549	0.881834	2.1164	1.5873	0.881834	2.46914
127	5101.03	1.5873	0.925926	2.46914	1.5873	0.881834	2.46914
128	5219.47	1.76367	1.0582	2.29277	1.5873	0.881834	2.46914
129	5337.91	1.76367	1.27866	2.24868	1.5873	0.881834	2.46914
130	5456.35	1.76367	1.23457	2.29277	1.5873	0.881834	2.46914
131	5574.79	1.5873	1.0582	2.24868	1.5873	0.881834	2.46914
132	5693.23	1.76367	1.23457	2.46914	1.5873	0.881834	2.46914
133	5811.67	1.5873	1.23457	2.60141	1.5873	0.881834	2.46914
134	5930.11	1.94004	1.45503	2.46914	1.5873	0.881834	2.46914
135	6048.55	1.67549	1.23457	2.29277	1.5873	0.881834	2.46914
136	6166.99	1.5873	1.23457	2.1164	1.5873	0.881834	2.46914
137	6285.43	1.67549	1.23457	2.29277	1.5873	0.881834	2.46914
138	6403.87	1.67549	1.0582	2.29277	1.5873	0.881834	2.46914
139	6522.31	1.76367	1.10229	2.07231	1.5873	0.881834	2.46914
140	6640.75	1.67549	0.925926	2.24868	1.5873	0.881834	2.46914
141	6759.19	1.67549	0.881834	2.29277	1.5873	0.881834	2.46914
142	6877.63	1.5873	1.0582	2.29277	1.5873	0.881834	2.46914
143	6996.07	1.76367	1.0582	2.46914	1.5873	0.881834	2.46914
144	7114.51	1.67549	1.0582	2.29277	1.5873	0.881834	2.46914
145	7232.95	1.5873	1.0582	2.29277	1.5873	0.881834	2.46914
146	7351.39	1.49912	1.0582	2.07231	1.5873	0.881834	2.46914
147	7469.82	1.32275	0.925926	1.89594	1.5873	0.881834	2.46914
148	7588.26	1.23457	0.705467	1.94004	1.5873	0.881834	2.46914
149	7706.7	1.32275	0.925926	1.94004	1.5873	0.881834	2.46914
150	7825.14	1.5873	0.925926	2.1164	1.5873	0.881834	2.46914
151	7943.58	1.5873	1.0582	2.1164	1.5873	0.881834	2.46914
152	8062.02	1.5873	1.0582	2.29277	1.5873	0.881834	2.46914
153	8180.46	1.49912	1.0582	1.94004	1.5873	0.881834	2.46914
154	8298.9	1.5873	1.0582	2.1164	1.5873	0.881834	2.46914
155	8417.34	1.41093	1.0582	1.94004	1.5873	0.881834	2.46914
156	8535.78	1.41093	1.0582	1.94004	1.5873	0.881834	2.46914
157	8654.22	1.41093	0.881834	1.76367	1.5873	0.881834	2.46914
158	8772.66	1.41093	0.925926	1.94004	1.5873	0.881834	2.46914
159	8891.1	1.5873	0.705467	1.94004	1.5873	0.881834	2.46914
160	9009.54	1.41093	0.749559	1.94004	1.5873	0.881834	2.39859
161	9127.98	1.5873	0.925926	1.94004	1.5873	0.881834	2.38977
162	9246.42	1.49912	0.705467	2.29277	1.5873	0.881834	2.46914
163	9364.86	1.41093	0.881834	2.1164	1.5873	0.881834	2.42945
164	9483.3	1.41093	0.705467	1.94004	1.5873	0.881834	2.46914
165	9601.74	1.41093	0.749559	1.89594	1.5873	0.881834	2.46914
166	9720.18	1.41093	0.749559	1.94004	1.5873	0.881834	2.46914
167	9838.61	1.32275	0.925926	2.42504	1.5873	0.881834	2.46914
168	9948.92	1.60935	0.738536	2.35891	1.5873	0.881834	2.46914
