# Supplementary material for: The rapid developmental rise of somatic inhibition disengages hippocampal dynamics from self-motion
Source: eLife journal article supplement (doi:10.7554/elife.78116), 2022-07-20
Supplement: supp [file data_and_rnd_psth_P12_all_moves_no_cell_type_groups_.xlsx]

## Sheet: Sheet1
	Time	Median_active_cells	Percentile_25	Percentile_75	rnd_Median_active_cells	rnd_Percentile_5	rnd_Percentile_95
0	-9940.78	1.9802	1.69649	2.03312	1.9821	1.54981	2.37673
1	-9822.34	1.70068	1.66011	1.87489	1.9821	1.54981	2.37673
2	-9703.9	1.85422	1.67403	1.94033	1.9821	1.54981	2.37673
3	-9585.46	1.69231	1.64516	1.73418	1.9821	1.54981	2.37673
4	-9467.02	1.79028	1.69649	1.94033	1.9821	1.54981	2.37673
5	-9348.58	1.87075	1.62165	1.96918	1.9821	1.54981	2.37673
6	-9230.14	1.70068	1.58873	2.09706	2.01407	1.54981	2.37673
7	-9111.7	1.70068	1.61967	1.93883	2.04604	1.54981	2.37673
8	-8993.26	1.87075	1.71249	2.06509	1.9821	1.54981	2.37673
9	-8874.82	1.84615	1.73418	1.88931	1.9821	1.54981	2.37673
10	-8756.39	1.76768	1.66429	1.85668	1.9821	1.54981	2.37673
11	-8637.95	1.79028	1.73418	1.92822	1.9821	1.59312	2.37673
12	-8519.51	1.6624	1.57926	1.93318	1.9821	1.54981	2.37673
13	-8401.07	1.70068	1.54383	1.84292	1.9821	1.54981	2.37673
14	-8282.63	1.72634	1.47694	1.80692	1.9821	1.54981	2.37673
15	-8164.19	1.70068	1.50984	1.97164	1.9821	1.54981	2.37673
16	-8045.75	1.91816	1.57926	2.0101	1.9821	1.54981	2.37673
17	-7927.31	1.85422	1.62385	2.04856	1.9821	1.54981	2.37673
18	-7808.87	1.87075	1.54181	2.13636	1.9821	1.54981	2.37673
19	-7690.43	1.72634	1.49423	2.0101	2.04604	1.54981	2.37673
20	-7571.99	1.85422	1.66429	2.0101	1.9821	1.54981	2.37673
21	-7453.55	2	1.37795	2.09706	1.9821	1.54981	2.37673
22	-7335.11	1.93705	1.49423	2.0101	2.01407	1.54981	2.37673
23	-7216.67	1.9821	1.49423	2.08959	1.9821	1.54981	2.37673
24	-7098.23	1.86047	1.47993	1.96852	1.9821	1.54981	2.37673
25	-6979.79	1.72634	1.55653	1.96852	1.9821	1.54981	2.37673
26	-6861.35	1.6624	1.61841	1.8916	2.04604	1.54981	2.37673
27	-6742.91	1.62791	1.60369	1.96852	1.9821	1.54981	2.37673
28	-6624.47	1.6624	1.44025	1.8916	1.9821	1.54981	2.37673
29	-6506.04	1.62791	1.57172	1.69361	1.9821	1.54981	2.37673
30	-6387.6	1.6624	1.49423	1.69361	1.9821	1.54981	2.37673
31	-6269.16	1.69231	1.51728	1.6978	1.9821	1.54981	2.37673
32	-6150.72	1.69231	1.58122	1.6978	1.9821	1.54981	2.37673
33	-6032.28	1.69231	1.58122	1.71379	1.9821	1.54981	2.37673
34	-5913.84	1.62791	1.4495	1.7313	1.9821	1.63644	2.37673
35	-5795.4	1.62791	1.53649	1.95862	1.9821	1.57147	2.37673
36	-5676.96	1.69492	1.58318	1.77856	1.9821	1.54981	2.37673
37	-5558.52	1.69231	1.49423	1.81206	1.9821	1.54981	2.37673
38	-5440.08	1.62791	1.48796	1.75018	1.9821	1.54981	2.37673
39	-5321.64	1.84615	1.37795	1.89674	1.9821	1.59312	2.37673
40	-5203.2	1.73267	1.37795	1.85314	1.9821	1.54981	2.37673
41	-5084.76	1.60891	1.37795	1.89472	1.9821	1.54981	2.37673
42	-4966.32	1.67079	1.49423	1.81468	1.9821	1.54981	2.37673
43	-4847.88	1.60891	1.4495	1.69779	1.9821	1.63644	2.37673
44	-4729.44	1.70068	1.58873	1.81407	1.9821	1.54981	2.37673
45	-4611	1.53846	1.42285	1.81407	1.9821	1.54981	2.37673
46	-4492.56	1.54703	1.50452	1.81407	1.9821	1.54981	2.37673
47	-4374.12	1.62791	1.53649	1.81206	1.9821	1.63644	2.37673
48	-4255.68	1.73267	1.49803	1.81407	1.9821	1.63644	2.37673
49	-4137.25	1.79028	1.61461	1.92033	1.9821	1.63644	2.37673
50	-4018.81	1.76768	1.60463	1.82537	1.9821	1.54981	2.37673
51	-3900.37	1.85422	1.71668	1.94033	1.9821	1.54981	2.37673
52	-3781.93	1.9802	1.68154	2.05661	1.9821	1.54981	2.37673
53	-3663.49	1.91832	1.74548	2.05661	1.9821	1.54981	2.37673
54	-3545.05	1.91816	1.71668	2.05661	1.9821	1.54981	2.37673
55	-3426.61	2.0202	1.91721	2.1832	1.9821	1.54981	2.37673
56	-3308.17	1.85422	1.73418	2.15289	2.04604	1.54981	2.37673
57	-3189.73	1.9802	1.74548	2.17289	2.04604	1.54981	2.37673
58	-3071.29	1.9821	1.84044	2.29915	1.9821	1.54981	2.37673
59	-2952.85	2.10997	2.01051	2.29915	1.9821	1.54981	2.37673
60	-2834.41	2.17391	1.97957	2.29915	1.9821	1.54981	2.37673
61	-2715.97	2.36573	2.01051	2.5417	1.9821	1.54981	2.37673
62	-2597.53	2.27273	1.98195	2.46193	1.9821	1.54981	2.37673
63	-2479.09	2.42967	2.09044	2.5417	1.9821	1.63644	2.37673
64	-2360.65	2.36573	2.02041	2.5417	1.9821	1.54981	2.37673
65	-2242.21	2.49361	2.06702	2.5417	1.9821	1.54981	2.37673
66	-2123.77	2.27273	2.15232	2.49451	1.9821	1.54981	2.37673
67	-2005.33	2.23785	2.19078	2.41543	1.9821	1.54981	2.37673
68	-1886.89	2.27273	2.08292	2.4939	1.9821	1.54981	2.37673
69	-1768.46	2.27273	1.96668	2.4939	1.9821	1.54981	2.37673
70	-1650.02	2.27273	1.94326	2.47353	1.9821	1.54981	2.37673
71	-1531.58	2.27273	2.10548	2.62178	1.9821	1.54981	2.37673
72	-1413.14	2.27273	2.0436	2.68572	1.9821	1.54981	2.37673
73	-1294.7	2.52525	2.14395	2.71769	1.9821	1.54981	2.37673
74	-1176.26	2.52525	1.98172	2.802	1.9821	1.54981	2.37673
75	-1057.82	2.55814	1.9742	2.84167	1.9821	1.54981	2.37673
76	-939.379	2.52525	2.14395	2.65375	1.9821	1.54981	2.37673
77	-820.94	2.52525	2.05864	2.72707	1.9821	1.54981	2.37673
78	-702.5	2.46154	2.06517	2.5417	1.9821	1.59312	2.37673
79	-584.061	2.42967	2.15289	2.63941	1.9821	1.54981	2.37673
80	-465.621	2.46154	2.29673	2.66796	1.9821	1.54981	2.37673
81	-347.182	2.46154	2.11108	2.66796	1.9821	1.54981	2.37673
82	-228.742	2.30769	2.1713	2.42542	1.9821	1.54981	2.37673
83	-110.303	2.38095	2.30474	2.5417	1.9821	1.54981	2.37673
84	8.13687	2.46154	2.34137	2.5417	1.9821	1.54981	2.37673
85	126.576	2.32558	2.2408	2.62317	1.9821	1.54981	2.37673
86	245.016	2.52525	2.27277	2.80968	1.9821	1.54981	2.37673
87	363.455	2.52525	2.2408	2.92596	1.9821	1.54981	2.37673
88	481.895	2.30769	2.19135	2.63961	1.9821	1.54981	2.37673
89	600.334	2.27273	2.09994	2.75589	1.9821	1.54981	2.37673
90	718.774	2.27273	2.036	2.5222	1.9821	1.54981	2.37673
91	837.213	2.0202	1.89514	2.29948	1.9821	1.59312	2.37673
92	955.653	2	1.74548	2.22075	1.9821	1.54981	2.37673
93	1074.09	1.76768	1.71351	2.05113	1.9821	1.54981	2.37673
94	1192.53	1.76768	1.57378	1.96959	1.9821	1.54981	2.37673
95	1310.97	1.69231	1.35411	1.81407	1.9821	1.54981	2.37673
96	1429.41	1.51515	1.21353	1.66011	1.9821	1.54981	2.37673
97	1547.85	1.45278	1.19837	1.57153	1.9821	1.54981	2.37673
98	1666.29	1.27877	1.22414	1.57153	1.9821	1.54981	2.37673
99	1784.73	1.27877	1.22414	1.52681	1.9821	1.54981	2.37673
100	1903.17	1.26263	1.16226	1.40862	1.9821	1.59312	2.37673
101	2021.61	1.21065	0.946735	1.32899	1.9821	1.63644	2.37673
102	2140.05	1.02302	0.855549	1.32899	1.9821	1.63644	2.37673
103	2258.49	0.968523	0.850827	1.38998	1.9821	1.59312	2.37673
104	2376.93	0.990099	0.842736	1.38998	1.9821	1.54981	2.37673
105	2495.37	0.990099	0.963801	1.2737	1.9821	1.54981	2.37673
106	2613.81	0.930233	0.818857	1.13811	1.9821	1.54981	2.37673
107	2732.25	1.16279	0.944677	1.22071	1.9821	1.59312	2.37673
108	2850.68	0.990099	0.963801	1.19678	1.9821	1.63644	2.37673
109	2969.12	1.21065	1.0916	1.31112	1.9821	1.54981	2.37673
110	3087.56	1.16279	1.06713	1.22071	1.9821	1.54981	2.37673
111	3206	1.21065	1.0929	1.31112	1.9821	1.59312	2.37673
112	3324.44	1.21065	1.0929	1.34958	1.9821	1.54981	2.37673
113	3442.88	1.21065	1.07644	1.37258	1.9821	1.54981	2.37673
114	3561.32	1.21065	1.02205	1.52681	1.9821	1.59312	2.37673
115	3679.76	1.21065	1.13833	1.43785	1.9821	1.54981	2.37673
116	3798.2	1.21065	1.13833	1.61957	1.9821	1.54981	2.37673
117	3916.64	1.21483	1.18672	1.65803	1.9821	1.54981	2.37673
118	4035.08	1.45278	1.15684	1.60373	1.9821	1.57147	2.37673
119	4153.52	1.45278	1.20918	1.72999	1.9821	1.54981	2.37673
120	4271.96	1.69492	1.24115	1.76845	1.9821	1.54981	2.37673
121	4390.4	1.51515	1.20918	1.73207	1.9821	1.54981	2.37673
122	4508.84	1.69492	1.3894	1.80692	1.9821	1.54981	2.37673
123	4627.28	1.51515	1.30509	1.81468	1.9821	1.54981	2.37673
124	4745.72	1.51515	1.33706	1.77342	1.9821	1.54981	2.37673
125	4864.16	1.51515	1.27312	1.69649	1.9821	1.54981	2.37673
126	4982.6	1.51515	1.15684	1.69649	1.9821	1.54981	2.37673
127	5101.03	1.51515	1.13833	1.69649	1.9821	1.54981	2.37673
128	5219.47	1.70068	1.30509	1.80692	1.9821	1.54981	2.37673
129	5337.91	1.76768	1.27312	2.02041	1.9821	1.54981	2.37673
130	5456.35	1.76768	1.27312	2.05887	1.9821	1.54981	2.37673
131	5574.79	1.70068	1.3894	1.85236	1.9821	1.63644	2.37673
132	5693.23	1.70068	1.45334	1.88384	1.9821	1.54981	2.37673
133	5811.67	1.76768	1.45334	1.94349	1.9821	1.54981	2.37673
134	5930.11	1.84615	1.55519	1.95064	1.9821	1.63644	2.37673
135	6048.55	1.76768	1.48531	1.94349	1.9821	1.54981	2.37673
136	6166.99	1.70068	1.48531	1.80692	1.9821	1.54981	2.37673
137	6285.43	1.69231	1.45334	1.73418	1.9821	1.54981	2.37673
138	6403.87	1.69231	1.45334	1.73418	1.9821	1.54981	2.37673
139	6522.31	1.76768	1.31966	1.81485	1.9821	1.54981	2.37673
140	6640.75	1.69231	1.48531	1.73418	1.9821	1.54981	2.37673
141	6759.19	1.69231	1.51728	1.86044	1.9821	1.54981	2.37673
142	6877.63	1.70068	1.51728	1.80692	1.9821	1.54981	2.37673
143	6996.07	1.69231	1.46494	1.86044	1.9821	1.59312	2.37673
144	7114.51	1.70068	1.61342	1.94033	1.9821	1.54981	2.37673
145	7232.95	1.70068	1.51102	1.94033	1.9821	1.54981	2.37673
146	7351.39	1.53846	1.3836	1.82405	1.9821	1.54981	2.37673
147	7469.82	1.53846	1.35163	1.81407	1.9821	1.54981	2.37673
148	7588.26	1.53846	1.44754	1.94033	1.9821	1.54981	2.37673
149	7706.7	1.47059	1.37258	1.94033	1.9821	1.54981	2.37673
150	7825.14	1.62791	1.47256	1.86044	1.9821	1.59312	2.37673
151	7943.58	1.53846	1.44754	1.95032	1.9821	1.54981	2.37673
152	8062.02	1.61538	1.4795	1.95032	1.9821	1.54981	2.37673
153	8180.46	1.61538	1.41557	2.0666	1.9821	1.54981	2.37673
154	8298.9	1.59847	1.4495	2.0666	1.9821	1.54981	2.37673
155	8417.34	1.6624	1.4495	2.19286	1.9821	1.54981	2.37673
156	8535.78	1.70068	1.64539	2.30914	1.9821	1.54981	2.37673
157	8654.22	1.6624	1.49423	2.10878	1.9821	1.54981	2.37673
158	8772.66	1.79028	1.69649	2.0666	1.91816	1.54981	2.37673
159	8891.1	1.86047	1.69649	2.09544	1.91816	1.54981	2.37673
160	9009.54	1.91816	1.4495	2.18288	1.9821	1.54981	2.37673
161	9127.98	1.91816	1.52643	2.18288	2.04604	1.54981	2.37673
162	9246.42	1.84615	1.57541	2.05661	2.04604	1.54981	2.37673
163	9364.86	1.79028	1.56489	2.18288	2.04604	1.54981	2.37673
164	9483.3	1.76923	1.51147	2.05661	2.04604	1.54981	2.37673
165	9601.74	1.79028	1.48796	1.94033	2.04604	1.54981	2.37673
166	9720.18	1.6624	1.48796	1.94033	1.91816	1.54981	2.37673
167	9838.61	1.76923	1.44796	2.05661	1.91816	1.54981	2.37673
168	9948.92	1.75	1.54056	1.8797	1.93414	1.54981	2.37673
