# Supplementary material for: The rapid developmental rise of somatic inhibition disengages hippocampal dynamics from self-motion
Source: eLife journal article supplement (doi:10.7554/elife.78116), 2022-07-20
Supplement: supp [file elife-78116-supp-v1.zip]

| Parameter                          | Symbol                   | Value                      |
|------------------------------------|--------------------------|----------------------------|
| <b>Rate model</b>                  |                          |                            |
| Excitatory time constant           | $\tau_E$                 | 0.1 s                      |
| Inhibitory time constant           | $\tau_I$                 | 0.8 s                      |
| Connectivity matrix                |                          |                            |
|                                    | $J_{EE}$                 | $5.0 \text{ s}^{-1}$       |
|                                    | $J_{IE}$                 | $2.0 \text{ s}^{-1}$       |
|                                    | $J_{II}$                 | $-0.8 \text{ s}^{-1}$      |
|                                    | $J_{EI}^{\text{weak}}$   | $-0.0 \text{ s}^{-1}$      |
|                                    | $J_{EI}^{\text{strong}}$ | $-1.6 \text{ s}^{-1}$      |
| Noise amplitude                    | $\eta$                   | $0.25 \text{ s}^{-1/2}$    |
| External input                     |                          |                            |
|                                    | $H_E$                    | $3.5 \text{ s}^{-2}$       |
|                                    | $H_I$                    | $0.4 \text{ s}^{-2}$       |
| External drive increase            | $\alpha$                 | 3.0                        |
| Twitch amplitude                   |                          |                            |
|                                    | $J_E$                    | $50.0 \text{ s}^{-2}$      |
|                                    | $J_I$                    | $100.0 \text{ s}^{-2}$     |
| <b>LIF model</b>                   |                          |                            |
| Exc. synapse time constant         | $\tau_E$                 | 100.0 ms                   |
| Inh. synapse time constant         | $\tau_I$                 | 800.0 ms                   |
| Membrane time constant             | $\tau_m$                 | 20.0 ms                    |
| Threshold potential                | $V_{\text{thr}}$         | 20.0 mV                    |
| Reset potential                    | $V_{\text{reset}}$       | 0.0 mV                     |
| Connectivity                       |                          |                            |
| Nb. of excitatory neurons          | $N_E$                    | 1024                       |
| Nb. of inhibitory neurons          | $N_I$                    | 256                        |
| Connections from exc. neurons      | $K_E$                    | 64                         |
| Connections from inh. neurons      | $K_I$                    | 32                         |
| Connectivity matrix                |                          |                            |
|                                    | $J_{EE}$                 | 0.025 mV                   |
|                                    | $J_{IE}$                 | 0.1 mV                     |
|                                    | $J_{II}$                 | -0.0 mV                    |
|                                    | $J_{EI}^{\text{weak}}$   | -0.0005 mV                 |
|                                    | $J_{EI}^{\text{strong}}$ | -0.005 mV                  |
| Noise amplitude                    | $\eta$                   | $1.8 \text{ ms}^{-1/2}$    |
| External input (weak inhibition)   |                          |                            |
|                                    | $H_E$                    | $-0.07 \text{ mV ms}^{-1}$ |
|                                    | $H_I$                    | $0.015 \text{ mV ms}^{-1}$ |
| External input (strong inhibition) |                          |                            |
|                                    | $H_E$                    | $0.04 \text{ mV ms}^{-1}$  |
|                                    | $H_I$                    | $0.06 \text{ mV ms}^{-1}$  |
| Twitch amplitude                   |                          |                            |
|                                    | $J_E$                    | $0.2 \text{ mV ms}^{-1}$   |
|                                    | $J_I$                    | $0.2 \text{ mV ms}^{-1}$   |
| Twitch duration (lognormal)        |                          |                            |
| Mean parameter                     | $\mu$                    | -0.2                       |
| Std parameter                      | $\sigma$                 | 0.8                        |
