# Supplementary material for: The rapid developmental rise of somatic inhibition disengages hippocampal dynamics from self-motion
Source: eLife journal article supplement (doi:10.7554/elife.78116), 2022-07-20
Supplement: supp [file epochs_associated_single_cells_table.xlsx]

## Sheet: Sheet1
	Age	Weight	SubjectID	Session	Cell#	Cell-Type	all_moves_associated_cell	Rest_associated_cell
0	10	5.9	190921_191001	p10_190921_191001_191001_a000	0	Pyramidal	TRUE	FALSE
1	10	5.9	190921_191001	p10_190921_191001_191001_a000	1	Pyramidal	TRUE	FALSE
2	10	5.9	190921_191001	p10_190921_191001_191001_a000	2	Interneuron	TRUE	FALSE
3	10	5.9	190921_191001	p10_190921_191001_191001_a000	3	Interneuron	TRUE	FALSE
4	10	5.9	190921_191001	p10_190921_191001_191001_a000	4	Pyramidal	TRUE	FALSE
5	10	5.9	190921_191001	p10_190921_191001_191001_a000	5	Pyramidal	FALSE	TRUE
6	10	5.9	190921_191001	p10_190921_191001_191001_a000	6	Interneuron	TRUE	FALSE
7	10	5.9	190921_191001	p10_190921_191001_191001_a000	7	Pyramidal	TRUE	FALSE
8	10	5.9	190921_191001	p10_190921_191001_191001_a000	8	Pyramidal	FALSE	TRUE
9	10	5.9	190921_191001	p10_190921_191001_191001_a000	9	Interneuron	TRUE	FALSE
10	10	5.9	190921_191001	p10_190921_191001_191001_a000	10	Interneuron	TRUE	FALSE
11	10	5.9	190921_191001	p10_190921_191001_191001_a000	11	Pyramidal	FALSE	FALSE
12	10	5.9	190921_191001	p10_190921_191001_191001_a000	12	Pyramidal	FALSE	TRUE
13	10	5.9	190921_191001	p10_190921_191001_191001_a000	13	Red_ins	TRUE	FALSE
14	10	5.9	190921_191001	p10_190921_191001_191001_a000	14	Pyramidal	FALSE	FALSE
15	10	5.9	190921_191001	p10_190921_191001_191001_a000	15	Interneuron	TRUE	FALSE
16	10	5.9	190921_191001	p10_190921_191001_191001_a000	16	Interneuron	FALSE	TRUE
17	10	5.9	190921_191001	p10_190921_191001_191001_a000	17	Pyramidal	TRUE	FALSE
18	10	5.9	190921_191001	p10_190921_191001_191001_a000	18	Pyramidal	TRUE	FALSE
19	10	5.9	190921_191001	p10_190921_191001_191001_a000	19	Pyramidal	FALSE	FALSE
20	10	5.9	190921_191001	p10_190921_191001_191001_a000	20	Interneuron	FALSE	FALSE
21	10	5.9	190921_191001	p10_190921_191001_191001_a000	21	Pyramidal	FALSE	FALSE
22	10	5.9	190921_191001	p10_190921_191001_191001_a000	22	Interneuron	FALSE	FALSE
23	10	5.9	190921_191001	p10_190921_191001_191001_a000	23	Pyramidal	FALSE	TRUE
24	10	5.9	190921_191001	p10_190921_191001_191001_a000	24	Pyramidal	FALSE	TRUE
25	10	5.9	190921_191001	p10_190921_191001_191001_a000	25	Interneuron	FALSE	TRUE
26	10	5.9	190921_191001	p10_190921_191001_191001_a000	26	Interneuron	FALSE	FALSE
27	10	5.9	190921_191001	p10_190921_191001_191001_a000	27	Pyramidal	FALSE	FALSE
28	10	5.9	190921_191001	p10_190921_191001_191001_a000	28	Pyramidal	FALSE	TRUE
29	10	5.9	190921_191001	p10_190921_191001_191001_a000	29	Pyramidal	FALSE	TRUE
30	10	5.9	190921_191001	p10_190921_191001_191001_a000	30	Pyramidal	FALSE	TRUE
31	10	5.9	190921_191001	p10_190921_191001_191001_a000	31	Pyramidal	FALSE	FALSE
32	10	5.9	190921_191001	p10_190921_191001_191001_a000	32	Red_ins	FALSE	FALSE
33	10	5.9	190921_191001	p10_190921_191001_191001_a000	33	Pyramidal	TRUE	FALSE
34	10	5.9	190921_191001	p10_190921_191001_191001_a000	34	Interneuron	FALSE	FALSE
35	10	5.9	190921_191001	p10_190921_191001_191001_a000	35	Pyramidal	FALSE	TRUE
36	10	5.9	190921_191001	p10_190921_191001_191001_a000	36	Pyramidal	FALSE	TRUE
37	10	5.9	190921_191001	p10_190921_191001_191001_a000	37	Interneuron	TRUE	FALSE
38	10	5.9	190921_191001	p10_190921_191001_191001_a000	38	Pyramidal	FALSE	TRUE
39	10	5.9	190921_191001	p10_190921_191001_191001_a000	39	Pyramidal	FALSE	TRUE
40	10	5.9	190921_191001	p10_190921_191001_191001_a000	40	Pyramidal	TRUE	FALSE
41	10	5.9	190921_191001	p10_190921_191001_191001_a000	41	Pyramidal	FALSE	FALSE
42	10	5.9	190921_191001	p10_190921_191001_191001_a000	42	Pyramidal	FALSE	TRUE
43	10	5.9	190921_191001	p10_190921_191001_191001_a000	43	Pyramidal	FALSE	FALSE
44	10	5.9	190921_191001	p10_190921_191001_191001_a000	44	Interneuron	FALSE	FALSE
45	10	5.9	190921_191001	p10_190921_191001_191001_a000	45	Pyramidal	FALSE	TRUE
46	10	5.9	190921_191001	p10_190921_191001_191001_a000	46	Pyramidal	FALSE	FALSE
47	10	5.9	190921_191001	p10_190921_191001_191001_a000	47	Pyramidal	FALSE	TRUE
48	10	5.9	190921_191001	p10_190921_191001_191001_a000	48	Pyramidal	FALSE	TRUE
49	10	5.9	190921_191001	p10_190921_191001_191001_a000	49	Pyramidal	FALSE	TRUE
50	10	5.9	190921_191001	p10_190921_191001_191001_a000	50	Pyramidal	FALSE	TRUE
51	10	5.9	190921_191001	p10_190921_191001_191001_a000	51	Interneuron	TRUE	FALSE
52	10	5.9	190921_191001	p10_190921_191001_191001_a000	52	Pyramidal	FALSE	FALSE
53	10	5.9	190921_191001	p10_190921_191001_191001_a000	53	Pyramidal	FALSE	TRUE
54	10	5.9	190921_191001	p10_190921_191001_191001_a000	54	Pyramidal	FALSE	TRUE
55	10	5.9	190921_191001	p10_190921_191001_191001_a000	55	Pyramidal	FALSE	TRUE
56	10	5.9	190921_191001	p10_190921_191001_191001_a000	56	Pyramidal	FALSE	TRUE
57	10	5.9	190921_191001	p10_190921_191001_191001_a000	57	Interneuron	FALSE	TRUE
58	10	5.9	190921_191001	p10_190921_191001_191001_a000	58	Pyramidal	FALSE	FALSE
59	10	5.9	190921_191001	p10_190921_191001_191001_a000	59	Pyramidal	TRUE	FALSE
60	10	5.9	190921_191001	p10_190921_191001_191001_a000	60	Pyramidal	FALSE	FALSE
61	10	5.9	190921_191001	p10_190921_191001_191001_a000	61	Pyramidal	FALSE	TRUE
62	10	5.9	190921_191001	p10_190921_191001_191001_a000	62	Pyramidal	FALSE	FALSE
63	10	5.9	190921_191001	p10_190921_191001_191001_a000	63	Pyramidal	TRUE	FALSE
64	10	5.9	190921_191001	p10_190921_191001_191001_a000	64	Pyramidal	FALSE	TRUE
65	10	5.9	190921_191001	p10_190921_191001_191001_a000	65	Pyramidal	FALSE	FALSE
66	10	5.9	190921_191001	p10_190921_191001_191001_a000	66	Interneuron	FALSE	FALSE
67	10	5.9	190921_191001	p10_190921_191001_191001_a000	67	Pyramidal	FALSE	TRUE
68	10	5.9	190921_191001	p10_190921_191001_191001_a000	68	Red_ins	TRUE	FALSE
69	10	5.9	190921_191001	p10_190921_191001_191001_a000	69	Pyramidal	FALSE	TRUE
70	10	5.9	190921_191001	p10_190921_191001_191001_a000	70	Pyramidal	FALSE	TRUE
71	10	5.9	190921_191001	p10_190921_191001_191001_a000	71	Interneuron	FALSE	TRUE
72	10	5.9	190921_191001	p10_190921_191001_191001_a000	72	Interneuron	TRUE	FALSE
73	10	5.9	190921_191001	p10_190921_191001_191001_a000	73	Pyramidal	FALSE	FALSE
74	10	5.9	190921_191001	p10_190921_191001_191001_a000	74	Pyramidal	FALSE	TRUE
75	10	5.9	190921_191001	p10_190921_191001_191001_a000	75	Pyramidal	FALSE	TRUE
76	10	5.9	190921_191001	p10_190921_191001_191001_a000	76	Pyramidal	FALSE	TRUE
77	10	5.9	190921_191001	p10_190921_191001_191001_a000	77	Pyramidal	FALSE	TRUE
78	10	5.9	190921_191001	p10_190921_191001_191001_a000	78	Pyramidal	FALSE	TRUE
79	10	5.9	190921_191001	p10_190921_191001_191001_a000	79	Pyramidal	FALSE	TRUE
80	10	5.9	190921_191001	p10_190921_191001_191001_a000	80	Pyramidal	FALSE	TRUE
81	10	5.9	190921_191001	p10_190921_191001_191001_a000	81	Pyramidal	FALSE	FALSE
82	10	5.9	190921_191001	p10_190921_191001_191001_a000	82	Pyramidal	FALSE	FALSE
83	10	5.9	190921_191001	p10_190921_191001_191001_a000	83	Pyramidal	TRUE	FALSE
84	10	5.9	190921_191001	p10_190921_191001_191001_a000	84	Pyramidal	FALSE	TRUE
85	10	5.9	190921_191001	p10_190921_191001_191001_a000	85	Pyramidal	FALSE	FALSE
86	10	5.9	190921_191001	p10_190921_191001_191001_a000	86	Pyramidal	TRUE	FALSE
87	10	5.9	190921_191001	p10_190921_191001_191001_a000	87	Pyramidal	FALSE	TRUE
88	10	5.9	190921_191001	p10_190921_191001_191001_a000	88	Pyramidal	FALSE	FALSE
89	10	5.9	190921_191001	p10_190921_191001_191001_a000	89	Pyramidal	FALSE	FALSE
90	10	5.9	190921_191001	p10_190921_191001_191001_a000	90	Interneuron	TRUE	FALSE
91	10	5.9	190921_191001	p10_190921_191001_191001_a000	91	Pyramidal	FALSE	TRUE
92	10	5.9	190921_191001	p10_190921_191001_191001_a000	92	Pyramidal	FALSE	FALSE
93	10	5.9	190921_191001	p10_190921_191001_191001_a000	93	Pyramidal	FALSE	FALSE
94	10	5.9	190921_191001	p10_190921_191001_191001_a000	94	Pyramidal	FALSE	TRUE
95	10	5.9	190921_191001	p10_190921_191001_191001_a000	95	Pyramidal	FALSE	FALSE
96	10	5.9	190921_191001	p10_190921_191001_191001_a000	96	Pyramidal	FALSE	TRUE
97	10	5.9	190921_191001	p10_190921_191001_191001_a000	97	Interneuron	TRUE	FALSE
98	10	5.9	190921_191001	p10_190921_191001_191001_a000	98	Pyramidal	FALSE	TRUE
99	10	5.9	190921_191001	p10_190921_191001_191001_a000	99	Pyramidal	FALSE	TRUE
100	10	5.9	190921_191001	p10_190921_191001_191001_a000	100	Pyramidal	FALSE	TRUE
101	10	5.9	190921_191001	p10_190921_191001_191001_a000	101	Pyramidal	FALSE	TRUE
102	10	5.9	190921_191001	p10_190921_191001_191001_a000	102	Pyramidal	FALSE	TRUE
103	10	5.9	190921_191001	p10_190921_191001_191001_a000	103	Pyramidal	FALSE	TRUE
104	10	5.9	190921_191001	p10_190921_191001_191001_a000	104	Pyramidal	FALSE	TRUE
105	10	5.9	190921_191001	p10_190921_191001_191001_a000	105	Pyramidal	FALSE	TRUE
106	10	5.9	190921_191001	p10_190921_191001_191001_a000	106	Pyramidal	FALSE	TRUE
107	10	5.9	190921_191001	p10_190921_191001_191001_a000	107	Pyramidal	FALSE	FALSE
108	10	5.9	190921_191001	p10_190921_191001_191001_a000	108	Pyramidal	FALSE	TRUE
109	10	5.9	190921_191001	p10_190921_191001_191001_a000	109	Pyramidal	FALSE	TRUE
110	10	5.9	190921_191001	p10_190921_191001_191001_a000	110	Interneuron	TRUE	FALSE
111	10	5.9	190921_191001	p10_190921_191001_191001_a000	111	Interneuron	FALSE	FALSE
112	10	5.9	190921_191001	p10_190921_191001_191001_a000	112	Pyramidal	FALSE	FALSE
113	10	5.9	190921_191001	p10_190921_191001_191001_a000	113	Pyramidal	FALSE	TRUE
114	10	5.9	190921_191001	p10_190921_191001_191001_a000	114	Pyramidal	FALSE	FALSE
115	10	5.9	190921_191001	p10_190921_191001_191001_a000	115	Pyramidal	FALSE	FALSE
116	10	5.9	190921_191001	p10_190921_191001_191001_a000	116	Pyramidal	FALSE	TRUE
117	10	5.9	190921_191001	p10_190921_191001_191001_a000	117	Pyramidal	FALSE	FALSE
118	10	5.9	190921_191001	p10_190921_191001_191001_a000	118	Pyramidal	FALSE	TRUE
119	10	5.9	190921_191001	p10_190921_191001_191001_a000	119	Pyramidal	FALSE	TRUE
120	10	5.9	190921_191001	p10_190921_191001_191001_a000	120	Interneuron	FALSE	FALSE
121	10	5.9	190921_191001	p10_190921_191001_191001_a000	121	Pyramidal	FALSE	FALSE
122	10	5.9	190921_191001	p10_190921_191001_191001_a000	122	Pyramidal	FALSE	TRUE
123	10	5.9	190921_191001	p10_190921_191001_191001_a000	123	Pyramidal	FALSE	TRUE
124	10	5.9	190921_191001	p10_190921_191001_191001_a000	124	Interneuron	FALSE	FALSE
125	10	5.9	190921_191001	p10_190921_191001_191001_a000	125	Pyramidal	FALSE	TRUE
126	10	5.9	190921_191001	p10_190921_191001_191001_a000	126	Pyramidal	FALSE	TRUE
127	10	5.9	190921_191001	p10_190921_191001_191001_a000	127	Pyramidal	FALSE	FALSE
128	10	5.9	190921_191001	p10_190921_191001_191001_a000	128	Pyramidal	FALSE	TRUE
129	10	5.9	190921_191001	p10_190921_191001_191001_a000	129	Pyramidal	FALSE	TRUE
130	10	5.9	190921_191001	p10_190921_191001_191001_a000	130	Pyramidal	FALSE	TRUE
131	10	5.9	190921_191001	p10_190921_191001_191001_a000	131	Pyramidal	FALSE	TRUE
132	10	5.9	190921_191001	p10_190921_191001_191001_a000	132	Pyramidal	FALSE	TRUE
133	10	5.9	190921_191001	p10_190921_191001_191001_a000	133	Pyramidal	FALSE	FALSE
134	10	5.9	190921_191001	p10_190921_191001_191001_a000	134	Pyramidal	FALSE	TRUE
135	10	5.9	190921_191001	p10_190921_191001_191001_a000	135	Pyramidal	FALSE	TRUE
136	10	5.9	190921_191001	p10_190921_191001_191001_a000	136	Pyramidal	FALSE	FALSE
137	10	5.9	190921_191001	p10_190921_191001_191001_a000	137	Pyramidal	FALSE	TRUE
138	10	5.9	190921_191001	p10_190921_191001_191001_a000	138	Pyramidal	TRUE	FALSE
139	10	5.9	190921_191001	p10_190921_191001_191001_a000	139	Pyramidal	TRUE	FALSE
140	10	5.9	190921_191001	p10_190921_191001_191001_a000	140	Pyramidal	FALSE	TRUE
141	10	5.9	190921_191001	p10_190921_191001_191001_a000	141	Pyramidal	FALSE	TRUE
142	10	5.9	190921_191001	p10_190921_191001_191001_a000	142	Interneuron	TRUE	FALSE
143	10	5.9	190921_191001	p10_190921_191001_191001_a000	143	Pyramidal	FALSE	TRUE
144	10	5.9	190921_191001	p10_190921_191001_191001_a000	144	Pyramidal	FALSE	TRUE
145	10	5.9	190921_191001	p10_190921_191001_191001_a000	145	Pyramidal	FALSE	FALSE
146	10	5.9	190921_191001	p10_190921_191001_191001_a000	146	Pyramidal	FALSE	FALSE
147	10	5.9	190921_191001	p10_190921_191001_191001_a000	147	Pyramidal	FALSE	FALSE
148	10	5.9	190921_191001	p10_190921_191001_191001_a000	148	Pyramidal	FALSE	FALSE
149	10	5.9	190921_191001	p10_190921_191001_191001_a000	149	Pyramidal	FALSE	TRUE
150	10	5.9	190921_191001	p10_190921_191001_191001_a000	150	Interneuron	FALSE	FALSE
151	10	5.9	190921_191001	p10_190921_191001_191001_a000	151	Pyramidal	FALSE	TRUE
152	10	5.9	190921_191001	p10_190921_191001_191001_a000	152	Pyramidal	FALSE	TRUE
153	10	5.9	190921_191001	p10_190921_191001_191001_a000	153	Pyramidal	FALSE	FALSE
154	10	5.9	190921_191001	p10_190921_191001_191001_a000	154	Pyramidal	FALSE	FALSE
155	10	5.9	190921_191001	p10_190921_191001_191001_a000	155	Pyramidal	FALSE	TRUE
156	10	5.9	190921_191001	p10_190921_191001_191001_a000	156	Pyramidal	FALSE	TRUE
157	10	5.9	190921_191001	p10_190921_191001_191001_a000	157	Pyramidal	FALSE	TRUE
158	10	5.9	190921_191001	p10_190921_191001_191001_a000	158	Pyramidal	FALSE	TRUE
159	10	5.9	190921_191001	p10_190921_191001_191001_a000	159	Pyramidal	FALSE	TRUE
160	10	5.9	190921_191001	p10_190921_191001_191001_a000	160	Pyramidal	FALSE	TRUE
161	10	5.9	190921_191001	p10_190921_191001_191001_a000	161	Interneuron	FALSE	TRUE
162	10	5.9	190921_191001	p10_190921_191001_191001_a000	162	Pyramidal	FALSE	FALSE
163	10	5.9	190921_191001	p10_190921_191001_191001_a000	163	Pyramidal	TRUE	FALSE
164	10	5.9	190921_191001	p10_190921_191001_191001_a000	164	Pyramidal	FALSE	TRUE
165	10	5.9	190921_191001	p10_190921_191001_191001_a000	165	Interneuron	FALSE	FALSE
166	10	5.9	190921_191001	p10_190921_191001_191001_a000	166	Pyramidal	FALSE	FALSE
167	10	5.9	190921_191001	p10_190921_191001_191001_a000	167	Pyramidal	FALSE	FALSE
168	10	5.9	190921_191001	p10_190921_191001_191001_a000	168	Pyramidal	FALSE	TRUE
169	10	5.9	190921_191001	p10_190921_191001_191001_a000	169	Pyramidal	FALSE	TRUE
170	10	5.9	190921_191001	p10_190921_191001_191001_a000	170	Pyramidal	FALSE	TRUE
171	10	5.9	190921_191001	p10_190921_191001_191001_a000	171	Pyramidal	FALSE	FALSE
172	10	5.9	190921_191001	p10_190921_191001_191001_a000	172	Pyramidal	FALSE	TRUE
173	10	5.9	190921_191001	p10_190921_191001_191001_a000	173	Pyramidal	TRUE	TRUE
174	10	5.9	190921_191001	p10_190921_191001_191001_a000	174	Pyramidal	FALSE	TRUE
175	10	5.9	190921_191001	p10_190921_191001_191001_a000	175	Pyramidal	FALSE	TRUE
176	10	5.9	190921_191001	p10_190921_191001_191001_a000	176	Pyramidal	FALSE	FALSE
177	10	5.9	190921_191001	p10_190921_191001_191001_a000	177	Pyramidal	FALSE	TRUE
178	10	5.9	190921_191001	p10_190921_191001_191001_a000	178	Pyramidal	FALSE	FALSE
179	10	5.9	190921_191001	p10_190921_191001_191001_a000	179	Pyramidal	FALSE	TRUE
180	10	5.9	190921_191001	p10_190921_191001_191001_a000	180	Pyramidal	FALSE	FALSE
181	10	5.9	190921_191001	p10_190921_191001_191001_a000	181	Pyramidal	FALSE	TRUE
182	10	5.9	190921_191001	p10_190921_191001_191001_a000	182	Pyramidal	FALSE	TRUE
183	10	5.9	190921_191001	p10_190921_191001_191001_a000	183	Pyramidal	FALSE	FALSE
184	10	5.9	190921_191001	p10_190921_191001_191001_a000	184	Pyramidal	FALSE	FALSE
185	10	5.9	190921_191001	p10_190921_191001_191001_a000	185	Pyramidal	FALSE	TRUE
186	10	5.9	190921_191001	p10_190921_191001_191001_a000	186	Pyramidal	FALSE	FALSE
187	10	5.9	190921_191001	p10_190921_191001_191001_a000	187	Pyramidal	FALSE	TRUE
188	10	5.9	190921_191001	p10_190921_191001_191001_a000	188	Pyramidal	FALSE	FALSE
189	10	5.9	190921_191001	p10_190921_191001_191001_a000	189	Pyramidal	FALSE	TRUE
190	10	5.9	190921_191001	p10_190921_191001_191001_a000	190	Pyramidal	FALSE	FALSE
191	10	5.9	190921_191001	p10_190921_191001_191001_a000	191	Interneuron	FALSE	TRUE
192	10	5.9	190921_191001	p10_190921_191001_191001_a000	192	Pyramidal	FALSE	FALSE
193	10	5.9	190921_191001	p10_190921_191001_191001_a000	193	Pyramidal	FALSE	TRUE
194	10	5.9	190921_191001	p10_190921_191001_191001_a000	194	Pyramidal	FALSE	FALSE
195	10	5.9	190921_191001	p10_190921_191001_191001_a000	195	Pyramidal	FALSE	TRUE
196	10	5.9	190921_191001	p10_190921_191001_191001_a000	196	Pyramidal	FALSE	TRUE
197	10	5.9	190921_191001	p10_190921_191001_191001_a000	197	Pyramidal	FALSE	FALSE
198	10	5.9	190921_191001	p10_190921_191001_191001_a000	198	Pyramidal	FALSE	FALSE
199	10	5.9	190921_191001	p10_190921_191001_191001_a000	199	Pyramidal	FALSE	FALSE
200	10	5.9	190921_191001	p10_190921_191001_191001_a000	200	Pyramidal	FALSE	FALSE
201	10	5.9	190921_191001	p10_190921_191001_191001_a000	201	Pyramidal	FALSE	TRUE
202	10	5.9	190921_191001	p10_190921_191001_191001_a000	202	Pyramidal	FALSE	FALSE
203	10	5.9	190921_191001	p10_190921_191001_191001_a000	203	Pyramidal	FALSE	TRUE
204	10	5.9	190921_191001	p10_190921_191001_191001_a000	204	Pyramidal	FALSE	TRUE
205	10	5.9	190921_191001	p10_190921_191001_191001_a000	205	Pyramidal	FALSE	TRUE
206	10	5.9	190921_191001	p10_190921_191001_191001_a000	206	Interneuron	FALSE	TRUE
207	10	5.9	190921_191001	p10_190921_191001_191001_a000	207	Pyramidal	FALSE	TRUE
208	10	5.9	190921_191001	p10_190921_191001_191001_a000	208	Pyramidal	FALSE	TRUE
209	10	5.9	190921_191001	p10_190921_191001_191001_a000	209	Pyramidal	FALSE	TRUE
210	10	5.9	190921_191001	p10_190921_191001_191001_a000	210	Pyramidal	FALSE	FALSE
211	10	5.9	190921_191001	p10_190921_191001_191001_a000	211	Pyramidal	FALSE	FALSE
212	10	5.9	190921_191001	p10_190921_191001_191001_a000	212	Pyramidal	FALSE	TRUE
213	10	5.9	190921_191001	p10_190921_191001_191001_a000	213	Pyramidal	FALSE	FALSE
214	10	5.9	190921_191001	p10_190921_191001_191001_a000	214	Pyramidal	FALSE	TRUE
215	10	5.9	190921_191001	p10_190921_191001_191001_a000	215	Pyramidal	FALSE	TRUE
216	10	5.9	190921_191001	p10_190921_191001_191001_a000	216	Pyramidal	FALSE	TRUE
217	10	5.9	190921_191001	p10_190921_191001_191001_a000	217	Pyramidal	FALSE	FALSE
218	10	5.9	190921_191001	p10_190921_191001_191001_a000	218	Pyramidal	FALSE	TRUE
219	10	5.9	190921_191001	p10_190921_191001_191001_a000	219	Pyramidal	FALSE	TRUE
220	10	5.9	190921_191001	p10_190921_191001_191001_a000	220	Pyramidal	FALSE	TRUE
221	10	5.9	190921_191001	p10_190921_191001_191001_a000	221	Pyramidal	FALSE	TRUE
222	10	5.9	190921_191001	p10_190921_191001_191001_a000	222	Pyramidal	FALSE	TRUE
223	10	5.9	190921_191001	p10_190921_191001_191001_a000	223	Pyramidal	FALSE	TRUE
224	10	5.9	190921_191001	p10_190921_191001_191001_a000	224	Pyramidal	FALSE	TRUE
225	10	5.9	190921_191001	p10_190921_191001_191001_a000	225	Pyramidal	FALSE	TRUE
226	10	5.9	190921_191001	p10_190921_191001_191001_a000	226	Pyramidal	FALSE	FALSE
227	10	5.9	190921_191001	p10_190921_191001_191001_a000	227	Pyramidal	FALSE	TRUE
228	10	5.9	190921_191001	p10_190921_191001_191001_a000	228	Pyramidal	FALSE	TRUE
229	10	5.9	190921_191001	p10_190921_191001_191001_a000	229	Interneuron	FALSE	TRUE
230	10	5.9	190921_191001	p10_190921_191001_191001_a000	230	Pyramidal	FALSE	TRUE
231	10	5.9	190921_191001	p10_190921_191001_191001_a000	231	Pyramidal	FALSE	TRUE
232	10	5.9	190921_191001	p10_190921_191001_191001_a000	232	Pyramidal	FALSE	FALSE
233	10	5.9	190921_191001	p10_190921_191001_191001_a000	233	Pyramidal	FALSE	FALSE
234	10	5.9	190921_191001	p10_190921_191001_191001_a000	234	Pyramidal	FALSE	FALSE
235	10	5.9	190921_191001	p10_190921_191001_191001_a000	235	Pyramidal	FALSE	FALSE
236	10	5.9	190921_191001	p10_190921_191001_191001_a000	236	Pyramidal	FALSE	TRUE
237	10	5.9	190921_191001	p10_190921_191001_191001_a000	237	Pyramidal	FALSE	TRUE
238	10	5.9	190921_191001	p10_190921_191001_191001_a000	238	Pyramidal	TRUE	FALSE
239	10	5.9	190921_191001	p10_190921_191001_191001_a000	239	Pyramidal	FALSE	FALSE
240	10	5.9	190921_191001	p10_190921_191001_191001_a000	240	Pyramidal	FALSE	TRUE
241	10	5.9	190921_191001	p10_190921_191001_191001_a000	241	Pyramidal	FALSE	FALSE
242	10	5.9	190921_191001	p10_190921_191001_191001_a000	242	Pyramidal	FALSE	TRUE
243	10	5.9	190921_191001	p10_190921_191001_191001_a000	243	Interneuron	FALSE	TRUE
244	10	5.9	190921_191001	p10_190921_191001_191001_a000	244	Interneuron	FALSE	TRUE
245	10	5.9	190921_191001	p10_190921_191001_191001_a000	245	Pyramidal	FALSE	FALSE
246	10	5.9	190921_191001	p10_190921_191001_191001_a000	246	Pyramidal	FALSE	TRUE
247	10	5.9	190921_191001	p10_190921_191001_191001_a000	247	Pyramidal	FALSE	TRUE
248	10	5.9	190921_191001	p10_190921_191001_191001_a000	248	Pyramidal	FALSE	FALSE
249	10	5.9	190921_191001	p10_190921_191001_191001_a000	249	Pyramidal	FALSE	FALSE
250	10	5.9	190921_191001	p10_190921_191001_191001_a000	250	Pyramidal	FALSE	TRUE
251	10	5.9	190921_191001	p10_190921_191001_191001_a000	251	Pyramidal	FALSE	FALSE
252	10	5.9	190921_191001	p10_190921_191001_191001_a000	252	Pyramidal	TRUE	FALSE
253	10	5.9	190921_191001	p10_190921_191001_191001_a000	253	Pyramidal	FALSE	TRUE
254	10	5.9	190921_191001	p10_190921_191001_191001_a000	254	Pyramidal	FALSE	TRUE
255	10	5.9	190921_191001	p10_190921_191001_191001_a000	255	Pyramidal	FALSE	FALSE
256	10	5.9	190921_191001	p10_190921_191001_191001_a000	256	Pyramidal	FALSE	TRUE
257	10	5.9	190921_191001	p10_190921_191001_191001_a000	257	Pyramidal	FALSE	FALSE
258	10	5.9	190921_191001	p10_190921_191001_191001_a000	258	Pyramidal	FALSE	TRUE
259	10	5.9	190921_191001	p10_190921_191001_191001_a000	259	Pyramidal	FALSE	TRUE
260	10	5.9	190921_191001	p10_190921_191001_191001_a000	260	Pyramidal	FALSE	TRUE
261	10	5.9	190921_191001	p10_190921_191001_191001_a000	261	Pyramidal	FALSE	TRUE
262	10	5.9	190921_191001	p10_190921_191001_191001_a000	262	Pyramidal	FALSE	FALSE
263	10	5.9	190921_191001	p10_190921_191001_191001_a000	263	Pyramidal	FALSE	TRUE
264	10	5.9	190921_191001	p10_190921_191001_191001_a000	264	Pyramidal	FALSE	TRUE
265	10	5.9	190921_191001	p10_190921_191001_191001_a000	265	Pyramidal	FALSE	FALSE
266	10	5.9	190921_191001	p10_190921_191001_191001_a000	266	Pyramidal	FALSE	TRUE
267	10	5.9	190921_191001	p10_190921_191001_191001_a000	267	Pyramidal	FALSE	TRUE
268	10	5.9	190921_191001	p10_190921_191001_191001_a000	268	Pyramidal	FALSE	TRUE
269	10	5.9	190921_191001	p10_190921_191001_191001_a000	269	Pyramidal	FALSE	TRUE
270	10	5.9	190921_191001	p10_190921_191001_191001_a000	270	Pyramidal	FALSE	TRUE
271	10	5.9	190921_191001	p10_190921_191001_191001_a000	271	Pyramidal	FALSE	TRUE
272	10	5.9	190921_191001	p10_190921_191001_191001_a000	272	Pyramidal	FALSE	TRUE
273	10	5.9	190921_191001	p10_190921_191001_191001_a000	273	Pyramidal	FALSE	TRUE
274	10	5.9	190921_191001	p10_190921_191001_191001_a000	274	Pyramidal	FALSE	TRUE
275	10	5.9	190921_191001	p10_190921_191001_191001_a000	275	Pyramidal	FALSE	FALSE
276	10	5.9	190921_191001	p10_190921_191001_191001_a000	276	Pyramidal	FALSE	TRUE
277	10	5.9	190921_191001	p10_190921_191001_191001_a000	277	Pyramidal	FALSE	FALSE
278	10	5.9	190921_191001	p10_190921_191001_191001_a000	278	Pyramidal	FALSE	TRUE
279	10	5.9	190921_191001	p10_190921_191001_191001_a000	279	Pyramidal	TRUE	FALSE
280	10	5.9	190921_191001	p10_190921_191001_191001_a000	280	Pyramidal	FALSE	TRUE
281	10	5.9	190921_191001	p10_190921_191001_191001_a000	281	Pyramidal	FALSE	TRUE
282	10	5.9	190921_191001	p10_190921_191001_191001_a000	282	Pyramidal	TRUE	FALSE
283	10	5.9	190921_191001	p10_190921_191001_191001_a000	283	Pyramidal	FALSE	TRUE
284	10	5.9	190921_191001	p10_190921_191001_191001_a000	284	Pyramidal	FALSE	TRUE
285	10	5.9	190921_191001	p10_190921_191001_191001_a000	285	Pyramidal	FALSE	TRUE
286	10	5.9	190921_191001	p10_190921_191001_191001_a000	286	Pyramidal	FALSE	FALSE
287	10	5.9	190921_191001	p10_190921_191001_191001_a000	287	Pyramidal	FALSE	FALSE
288	10	5.9	190921_191001	p10_190921_191001_191001_a000	288	Pyramidal	FALSE	FALSE
289	10	5.9	190921_191001	p10_190921_191001_191001_a000	289	Pyramidal	FALSE	FALSE
290	10	5.9	190921_191001	p10_190921_191001_191001_a000	290	Interneuron	FALSE	TRUE
291	10	5.9	190921_191001	p10_190921_191001_191001_a000	291	Pyramidal	FALSE	FALSE
292	10	5.9	190921_191001	p10_190921_191001_191001_a000	292	Pyramidal	FALSE	TRUE
293	10	5.9	190921_191001	p10_190921_191001_191001_a000	293	Pyramidal	FALSE	TRUE
294	10	5.9	190921_191001	p10_190921_191001_191001_a000	294	Pyramidal	FALSE	TRUE
295	10	5.9	190921_191001	p10_190921_191001_191001_a000	295	Pyramidal	FALSE	FALSE
296	10	5.9	190921_191001	p10_190921_191001_191001_a000	296	Pyramidal	FALSE	TRUE
297	10	5.9	190921_191001	p10_190921_191001_191001_a000	297	Pyramidal	FALSE	FALSE
298	10	5.9	190921_191001	p10_190921_191001_191001_a000	298	Pyramidal	FALSE	TRUE
299	10	5.9	190921_191001	p10_190921_191001_191001_a000	299	Interneuron	FALSE	TRUE
300	10	5.9	190921_191001	p10_190921_191001_191001_a000	300	Pyramidal	FALSE	TRUE
301	10	5.9	190921_191001	p10_190921_191001_191001_a000	301	Pyramidal	FALSE	TRUE
302	10	5.9	190921_191001	p10_190921_191001_191001_a000	302	Pyramidal	FALSE	TRUE
303	10	5.9	190921_191001	p10_190921_191001_191001_a000	303	Pyramidal	FALSE	TRUE
304	10	5.9	190921_191001	p10_190921_191001_191001_a000	304	Pyramidal	FALSE	FALSE
305	10	5.9	190921_191001	p10_190921_191001_191001_a000	305	Pyramidal	FALSE	FALSE
306	10	5.9	190921_191001	p10_190921_191001_191001_a000	306	Pyramidal	FALSE	TRUE
307	10	5.9	190921_191001	p10_190921_191001_191001_a000	307	Pyramidal	FALSE	TRUE
308	10	5.9	190921_191001	p10_190921_191001_191001_a000	308	Pyramidal	FALSE	TRUE
309	10	5.9	190921_191001	p10_190921_191001_191001_a000	309	Pyramidal	FALSE	FALSE
310	10	5.9	190921_191001	p10_190921_191001_191001_a000	310	Pyramidal	FALSE	FALSE
311	10	5.9	190921_191001	p10_190921_191001_191001_a000	311	Pyramidal	FALSE	FALSE
312	10	5.9	190921_191001	p10_190921_191001_191001_a000	312	Pyramidal	FALSE	TRUE
313	10	5.9	190921_191001	p10_190921_191001_191001_a000	313	Pyramidal	FALSE	TRUE
314	10	5.9	190921_191001	p10_190921_191001_191001_a000	314	Pyramidal	FALSE	TRUE
315	10	5.9	190921_191001	p10_190921_191001_191001_a000	315	Pyramidal	FALSE	TRUE
316	10	5.9	190921_191001	p10_190921_191001_191001_a000	316	Pyramidal	FALSE	FALSE
317	10	5.9	190921_191001	p10_190921_191001_191001_a000	317	Pyramidal	FALSE	TRUE
318	10	5.9	190921_191001	p10_190921_191001_191001_a000	318	Pyramidal	FALSE	TRUE
319	10	5.9	190921_191001	p10_190921_191001_191001_a000	319	Pyramidal	FALSE	FALSE
320	10	5.9	190921_191001	p10_190921_191001_191001_a000	320	Pyramidal	FALSE	TRUE
321	10	5.9	190921_191001	p10_190921_191001_191001_a000	321	Pyramidal	FALSE	TRUE
322	10	5.9	190921_191001	p10_190921_191001_191001_a000	322	Pyramidal	FALSE	FALSE
323	10	5.9	190921_191001	p10_190921_191001_191001_a000	323	Pyramidal	FALSE	TRUE
324	10	5.9	190921_191001	p10_190921_191001_191001_a000	324	Pyramidal	FALSE	FALSE
325	10	5.9	190921_191001	p10_190921_191001_191001_a000	325	Interneuron	TRUE	FALSE
326	10	5.9	190921_191001	p10_190921_191001_191001_a000	326	Pyramidal	FALSE	FALSE
327	10	5.9	190921_191001	p10_190921_191001_191001_a000	327	Pyramidal	FALSE	TRUE
328	10	5.9	190921_191001	p10_190921_191001_191001_a000	328	Pyramidal	FALSE	TRUE
329	10	5.9	190921_191001	p10_190921_191001_191001_a000	329	Pyramidal	FALSE	FALSE
330	10	5.9	190921_191001	p10_190921_191001_191001_a000	330	Pyramidal	FALSE	FALSE
331	10	5.9	190921_191001	p10_190921_191001_191001_a000	331	Pyramidal	FALSE	FALSE
332	10	5.9	190921_191001	p10_190921_191001_191001_a000	332	Pyramidal	FALSE	TRUE
333	10	5.9	190921_191001	p10_190921_191001_191001_a000	333	Pyramidal	FALSE	TRUE
334	10	5.9	190921_191001	p10_190921_191001_191001_a000	334	Pyramidal	FALSE	TRUE
335	10	5.9	190921_191001	p10_190921_191001_191001_a000	335	Pyramidal	FALSE	TRUE
336	10	5.9	190921_191001	p10_190921_191001_191001_a000	336	Pyramidal	FALSE	FALSE
337	10	5.9	190921_191001	p10_190921_191001_191001_a000	337	Pyramidal	FALSE	FALSE
338	10	5.9	190921_191001	p10_190921_191001_191001_a000	338	Pyramidal	FALSE	TRUE
339	10	5.9	190921_191001	p10_190921_191001_191001_a000	339	Pyramidal	FALSE	TRUE
340	10	5.9	190921_191001	p10_190921_191001_191001_a000	340	Pyramidal	FALSE	TRUE
341	10	5.9	190921_191001	p10_190921_191001_191001_a000	341	Pyramidal	FALSE	FALSE
342	10	5.9	190921_191001	p10_190921_191001_191001_a000	342	Pyramidal	FALSE	FALSE
343	10	5.9	190921_191001	p10_190921_191001_191001_a000	343	Pyramidal	FALSE	TRUE
344	10	5.9	190921_191001	p10_190921_191001_191001_a000	344	Pyramidal	FALSE	FALSE
345	10	5.9	190921_191001	p10_190921_191001_191001_a000	345	Pyramidal	FALSE	TRUE
346	10	5.9	190921_191001	p10_190921_191001_191001_a000	346	Pyramidal	FALSE	FALSE
347	10	5.9	190921_191001	p10_190921_191001_191001_a000	347	Pyramidal	FALSE	TRUE
348	10	5.9	190921_191001	p10_190921_191001_191001_a000	348	Pyramidal	FALSE	FALSE
349	10	5.9	190921_191001	p10_190921_191001_191001_a000	349	Pyramidal	FALSE	TRUE
350	10	5.9	190921_191001	p10_190921_191001_191001_a000	350	Pyramidal	FALSE	FALSE
351	10	5.9	190921_191001	p10_190921_191001_191001_a000	351	Interneuron	FALSE	FALSE
352	10	5.9	190921_191001	p10_190921_191001_191001_a000	352	Pyramidal	FALSE	TRUE
353	10	5.9	190921_191001	p10_190921_191001_191001_a000	353	Pyramidal	FALSE	TRUE
354	10	5.9	190921_191001	p10_190921_191001_191001_a000	354	Pyramidal	FALSE	TRUE
355	10	5.9	190921_191001	p10_190921_191001_191001_a000	355	Pyramidal	FALSE	TRUE
356	10	5.9	190921_191001	p10_190921_191001_191001_a000	356	Pyramidal	FALSE	TRUE
357	10	5.9	190921_191001	p10_190921_191001_191001_a000	357	Pyramidal	FALSE	TRUE
358	10	5.9	190921_191001	p10_190921_191001_191001_a000	358	Pyramidal	FALSE	TRUE
359	10	5.9	190921_191001	p10_190921_191001_191001_a000	359	Pyramidal	FALSE	TRUE
360	10	5.9	190921_191001	p10_190921_191001_191001_a000	360	Pyramidal	FALSE	FALSE
361	10	5.9	190921_191001	p10_190921_191001_191001_a000	361	Pyramidal	FALSE	TRUE
362	10	5.9	190921_191001	p10_190921_191001_191001_a000	362	Pyramidal	FALSE	FALSE
363	10	5.9	190921_191001	p10_190921_191001_191001_a000	363	Pyramidal	FALSE	TRUE
364	10	5.9	190921_191001	p10_190921_191001_191001_a000	364	Pyramidal	FALSE	FALSE
365	10	5.9	190921_191001	p10_190921_191001_191001_a000	365	Pyramidal	FALSE	TRUE
366	10	5.9	190921_191001	p10_190921_191001_191001_a000	366	Pyramidal	FALSE	TRUE
367	10	5.9	190921_191001	p10_190921_191001_191001_a000	367	Pyramidal	FALSE	TRUE
368	10	5.9	190921_191001	p10_190921_191001_191001_a000	368	Pyramidal	FALSE	TRUE
369	10	5.9	190921_191001	p10_190921_191001_191001_a000	369	Pyramidal	FALSE	TRUE
370	10	5.9	190921_191001	p10_190921_191001_191001_a000	370	Red_ins	FALSE	FALSE
371	10	5.9	190921_191001	p10_190921_191001_191001_a000	371	Pyramidal	FALSE	TRUE
372	10	5.9	190921_191001	p10_190921_191001_191001_a000	372	Pyramidal	FALSE	TRUE
373	10	5.9	190921_191001	p10_190921_191001_191001_a000	373	Pyramidal	FALSE	TRUE
374	10	5.9	190921_191001	p10_190921_191001_191001_a000	374	Pyramidal	FALSE	TRUE
375	10	5.9	190921_191001	p10_190921_191001_191001_a000	375	Pyramidal	FALSE	TRUE
376	10	5.9	190921_191001	p10_190921_191001_191001_a000	376	Pyramidal	FALSE	FALSE
377	10	5.9	190921_191001	p10_190921_191001_191001_a000	377	Pyramidal	FALSE	TRUE
378	10	5.9	190921_191001	p10_190921_191001_191001_a000	378	Pyramidal	FALSE	FALSE
379	10	5.9	190921_191001	p10_190921_191001_191001_a000	379	Pyramidal	FALSE	TRUE
380	10	5.9	190921_191001	p10_190921_191001_191001_a000	380	Pyramidal	FALSE	FALSE
381	10	5.9	190921_191001	p10_190921_191001_191001_a000	381	Pyramidal	FALSE	TRUE
382	10	5.9	190921_191001	p10_190921_191001_191001_a000	382	Pyramidal	FALSE	TRUE
383	10	5.9	190921_191001	p10_190921_191001_191001_a000	383	Pyramidal	FALSE	FALSE
384	10	5.9	190921_191001	p10_190921_191001_191001_a000	384	Pyramidal	FALSE	FALSE
385	10	5.9	190921_191001	p10_190921_191001_191001_a000	385	Pyramidal	FALSE	TRUE
386	10	5.9	190921_191001	p10_190921_191001_191001_a000	386	Pyramidal	FALSE	FALSE
387	10	5.9	190921_191001	p10_190921_191001_191001_a000	387	Pyramidal	FALSE	FALSE
388	10	5.9	190921_191001	p10_190921_191001_191001_a000	388	Pyramidal	TRUE	FALSE
389	10	5.9	190921_191001	p10_190921_191001_191001_a000	389	Pyramidal	FALSE	TRUE
390	10	5.9	190921_191001	p10_190921_191001_191001_a000	390	Pyramidal	FALSE	TRUE
391	10	5.9	190921_191001	p10_190921_191001_191001_a000	391	Pyramidal	FALSE	TRUE
392	10	5.9	190921_191001	p10_190921_191001_191001_a000	392	Pyramidal	FALSE	FALSE
393	10	5.9	190921_191001	p10_190921_191001_191001_a000	393	Pyramidal	FALSE	TRUE
394	10	5.9	190921_191001	p10_190921_191001_191001_a000	394	Pyramidal	FALSE	FALSE
395	10	5.9	190921_191001	p10_190921_191001_191001_a000	395	Pyramidal	FALSE	FALSE
396	10	5.9	190921_191001	p10_190921_191001_191001_a000	396	Pyramidal	FALSE	TRUE
397	10	5.9	190921_191001	p10_190921_191001_191001_a000	397	Pyramidal	FALSE	TRUE
398	10	5.9	190921_191001	p10_190921_191001_191001_a000	398	Pyramidal	FALSE	TRUE
399	10	5.9	190921_191001	p10_190921_191001_191001_a000	399	Pyramidal	FALSE	TRUE
400	10	5.9	190921_191001	p10_190921_191001_191001_a000	400	Pyramidal	FALSE	TRUE
401	10	5.9	190921_191001	p10_190921_191001_191001_a000	401	Pyramidal	FALSE	TRUE
402	10	5.9	190921_191001	p10_190921_191001_191001_a000	402	Pyramidal	FALSE	TRUE
403	10	5.9	190921_191001	p10_190921_191001_191001_a000	403	Pyramidal	TRUE	FALSE
404	10	5.9	190921_191001	p10_190921_191001_191001_a000	404	Pyramidal	FALSE	FALSE
405	10	5.9	190921_191001	p10_190921_191001_191001_a000	405	Pyramidal	FALSE	FALSE
406	10	5.9	190921_191001	p10_190921_191001_191001_a000	406	Pyramidal	FALSE	TRUE
407	10	5.9	190921_191001	p10_190921_191001_191001_a000	407	Pyramidal	FALSE	TRUE
408	10	5.9	190921_191001	p10_190921_191001_191001_a000	408	Pyramidal	FALSE	FALSE
409	10	5.9	190921_191001	p10_190921_191001_191001_a000	409	Pyramidal	FALSE	TRUE
410	10	5.9	190921_191001	p10_190921_191001_191001_a000	410	Pyramidal	FALSE	FALSE
411	10	5.9	190921_191001	p10_190921_191001_191001_a000	411	Pyramidal	FALSE	TRUE
412	10	5.9	190921_191001	p10_190921_191001_191001_a000	412	Interneuron	FALSE	TRUE
413	10	5.9	190921_191001	p10_190921_191001_191001_a000	413	Pyramidal	FALSE	TRUE
414	10	5.9	190921_191001	p10_190921_191001_191001_a000	414	Pyramidal	FALSE	TRUE
415	10	5.9	190921_191001	p10_190921_191001_191001_a000	415	Pyramidal	FALSE	FALSE
416	10	5.9	190921_191001	p10_190921_191001_191001_a000	416	Pyramidal	FALSE	FALSE
417	10	5.9	190921_191001	p10_190921_191001_191001_a000	417	Interneuron	FALSE	FALSE
418	10	5.9	190921_191001	p10_190921_191001_191001_a000	418	Pyramidal	FALSE	TRUE
419	10	5.9	190921_191001	p10_190921_191001_191001_a000	419	Pyramidal	FALSE	TRUE
420	10	5.9	190921_191001	p10_190921_191001_191001_a000	420	Pyramidal	FALSE	TRUE
421	10	5.9	190921_191001	p10_190921_191001_191001_a000	421	Interneuron	FALSE	TRUE
422	10	5.9	190921_191001	p10_190921_191001_191001_a000	422	Pyramidal	FALSE	TRUE
423	10	5.9	190921_191001	p10_190921_191001_191001_a000	423	Pyramidal	FALSE	FALSE
424	10	5.9	190921_191001	p10_190921_191001_191001_a000	424	Pyramidal	FALSE	FALSE
425	10	5.9	190921_191001	p10_190921_191001_191001_a000	425	Pyramidal	FALSE	TRUE
426	10	5.9	190921_191001	p10_190921_191001_191001_a000	426	Pyramidal	FALSE	TRUE
427	10	5.9	190921_191001	p10_190921_191001_191001_a000	427	Pyramidal	FALSE	FALSE
428	10	5.9	190921_191001	p10_190921_191001_191001_a000	428	Interneuron	FALSE	TRUE
429	10	5.9	190921_191001	p10_190921_191001_191001_a000	429	Pyramidal	FALSE	FALSE
430	10	5.9	190921_191001	p10_190921_191001_191001_a000	430	Pyramidal	FALSE	TRUE
431	10	5.9	190921_191001	p10_190921_191001_191001_a000	431	Pyramidal	FALSE	TRUE
432	10	5.9	190921_191001	p10_190921_191001_191001_a000	432	Pyramidal	FALSE	TRUE
433	10	5.9	190921_191001	p10_190921_191001_191001_a000	433	Pyramidal	FALSE	FALSE
434	10	5.9	190921_191001	p10_190921_191001_191001_a000	434	Pyramidal	FALSE	FALSE
435	10	5.9	190921_191001	p10_190921_191001_191001_a000	435	Pyramidal	FALSE	TRUE
436	10	5.9	190921_191001	p10_190921_191001_191001_a000	436	Pyramidal	FALSE	TRUE
437	10	5.9	190921_191001	p10_190921_191001_191001_a000	437	Pyramidal	FALSE	FALSE
438	10	5.9	190921_191001	p10_190921_191001_191001_a000	438	Pyramidal	FALSE	FALSE
439	10	5.9	190921_191001	p10_190921_191001_191001_a000	439	Pyramidal	FALSE	TRUE
440	10	5.9	190921_191001	p10_190921_191001_191001_a000	440	Pyramidal	FALSE	TRUE
441	10	5.9	190921_191001	p10_190921_191001_191001_a000	441	Pyramidal	FALSE	TRUE
442	10	5.9	190921_191001	p10_190921_191001_191001_a000	442	Interneuron	FALSE	TRUE
443	10	5.9	190921_191001	p10_190921_191001_191001_a000	443	Pyramidal	FALSE	FALSE
444	10	5.9	190921_191001	p10_190921_191001_191001_a000	444	Pyramidal	FALSE	FALSE
445	10	5.9	190921_191001	p10_190921_191001_191001_a000	445	Pyramidal	FALSE	FALSE
446	10	5.9	190921_191001	p10_190921_191001_191001_a000	446	Pyramidal	FALSE	FALSE
447	10	5.9	190921_191001	p10_190921_191001_191001_a000	447	Pyramidal	TRUE	TRUE
448	10	5.9	190921_191001	p10_190921_191001_191001_a000	448	Pyramidal	FALSE	TRUE
449	10	5.9	190921_191001	p10_190921_191001_191001_a000	449	Interneuron	TRUE	FALSE
450	10	5.9	190921_191001	p10_190921_191001_191001_a000	450	Pyramidal	FALSE	TRUE
451	10	5.9	190921_191001	p10_190921_191001_191001_a000	451	Pyramidal	FALSE	TRUE
452	10	5.9	190921_191001	p10_190921_191001_191001_a000	452	Pyramidal	FALSE	TRUE
453	10	5.9	190921_191001	p10_190921_191001_191001_a000	453	Pyramidal	FALSE	FALSE
454	10	5.9	190921_191001	p10_190921_191001_191001_a000	454	Pyramidal	FALSE	FALSE
455	10	5.9	190921_191001	p10_190921_191001_191001_a000	455	Pyramidal	FALSE	TRUE
456	10	5.9	190921_191001	p10_190921_191001_191001_a000	456	Pyramidal	FALSE	TRUE
457	10	5.9	190921_191001	p10_190921_191001_191001_a000	457	Pyramidal	TRUE	TRUE
458	10	5.9	190921_191001	p10_190921_191001_191001_a000	458	Pyramidal	FALSE	TRUE
459	10	5.9	190921_191001	p10_190921_191001_191001_a000	459	Pyramidal	FALSE	FALSE
460	10	5.9	190921_191001	p10_190921_191001_191001_a000	460	Pyramidal	TRUE	FALSE
461	10	5.9	190921_191001	p10_190921_191001_191001_a000	461	Pyramidal	FALSE	FALSE
462	10	5.9	190921_191001	p10_190921_191001_191001_a000	462	Pyramidal	FALSE	FALSE
463	10	5.9	190921_191001	p10_190921_191001_191001_a000	463	Pyramidal	FALSE	TRUE
464	10	5.9	190921_191001	p10_190921_191001_191001_a000	464	Pyramidal	FALSE	TRUE
465	10	5.9	190921_191001	p10_190921_191001_191001_a000	465	Pyramidal	FALSE	TRUE
466	10	5.9	190921_191001	p10_190921_191001_191001_a000	466	Pyramidal	FALSE	TRUE
467	10	5.9	190921_191001	p10_190921_191001_191001_a000	467	Pyramidal	FALSE	TRUE
468	10	5.9	190921_191001	p10_190921_191001_191001_a000	468	Pyramidal	FALSE	TRUE
469	10	5.9	190921_191001	p10_190921_191001_191001_a000	469	Pyramidal	TRUE	FALSE
470	10	5.9	190921_191001	p10_190921_191001_191001_a000	470	Pyramidal	FALSE	TRUE
471	10	5.9	190921_191001	p10_190921_191001_191001_a000	471	Red_ins	FALSE	FALSE
472	10	5.9	190921_191001	p10_190921_191001_191001_a000	472	Pyramidal	FALSE	TRUE
473	10	5.9	190921_191001	p10_190921_191001_191001_a000	473	Pyramidal	FALSE	FALSE
474	10	5.9	190921_191001	p10_190921_191001_191001_a000	474	Pyramidal	TRUE	FALSE
475	10	5.9	190921_191001	p10_190921_191001_191001_a000	475	Pyramidal	FALSE	TRUE
476	10	5.9	190921_191001	p10_190921_191001_191001_a000	476	Pyramidal	FALSE	TRUE
477	10	5.9	190921_191001	p10_190921_191001_191001_a000	477	Pyramidal	FALSE	FALSE
478	10	5.9	190921_191001	p10_190921_191001_191001_a000	478	Pyramidal	FALSE	TRUE
479	10	5.9	190921_191001	p10_190921_191001_191001_a000	479	Pyramidal	TRUE	TRUE
480	10	5.9	190921_191001	p10_190921_191001_191001_a000	480	Pyramidal	TRUE	FALSE
481	10	5.9	190921_191001	p10_190921_191001_191001_a000	481	Pyramidal	FALSE	TRUE
482	10	5.9	190921_191001	p10_190921_191001_191001_a000	482	Pyramidal	TRUE	TRUE
483	10	5.9	190921_191001	p10_190921_191001_191001_a000	483	Red_ins	FALSE	FALSE
484	10	5.9	190921_191001	p10_190921_191001_191001_a000	484	Red_ins	FALSE	FALSE
485	10	5.9	190921_191001	p10_190921_191001_191001_a000	485	Red_ins	TRUE	FALSE
486	11	5.75	190921_191002	p11_190921_191002_191002_a001	0	Interneuron	TRUE	FALSE
487	11	5.75	190921_191002	p11_190921_191002_191002_a001	1	Red_ins	TRUE	FALSE
488	11	5.75	190921_191002	p11_190921_191002_191002_a001	2	Interneuron	FALSE	FALSE
489	11	5.75	190921_191002	p11_190921_191002_191002_a001	3	Pyramidal	TRUE	FALSE
490	11	5.75	190921_191002	p11_190921_191002_191002_a001	4	Interneuron	FALSE	FALSE
491	11	5.75	190921_191002	p11_190921_191002_191002_a001	5	Pyramidal	TRUE	FALSE
492	11	5.75	190921_191002	p11_190921_191002_191002_a001	6	Pyramidal	TRUE	FALSE
493	11	5.75	190921_191002	p11_190921_191002_191002_a001	7	Pyramidal	TRUE	FALSE
494	11	5.75	190921_191002	p11_190921_191002_191002_a001	8	Pyramidal	FALSE	TRUE
495	11	5.75	190921_191002	p11_190921_191002_191002_a001	9	Red_ins	TRUE	FALSE
496	11	5.75	190921_191002	p11_190921_191002_191002_a001	10	Interneuron	TRUE	FALSE
497	11	5.75	190921_191002	p11_190921_191002_191002_a001	11	Interneuron	TRUE	FALSE
498	11	5.75	190921_191002	p11_190921_191002_191002_a001	12	Red_ins	TRUE	FALSE
499	11	5.75	190921_191002	p11_190921_191002_191002_a001	13	Interneuron	FALSE	FALSE
500	11	5.75	190921_191002	p11_190921_191002_191002_a001	14	Interneuron	TRUE	FALSE
501	11	5.75	190921_191002	p11_190921_191002_191002_a001	15	Pyramidal	FALSE	FALSE
502	11	5.75	190921_191002	p11_190921_191002_191002_a001	16	Pyramidal	FALSE	FALSE
503	11	5.75	190921_191002	p11_190921_191002_191002_a001	17	Interneuron	FALSE	FALSE
504	11	5.75	190921_191002	p11_190921_191002_191002_a001	18	Pyramidal	FALSE	FALSE
505	11	5.75	190921_191002	p11_190921_191002_191002_a001	19	Pyramidal	TRUE	FALSE
506	11	5.75	190921_191002	p11_190921_191002_191002_a001	20	Interneuron	FALSE	FALSE
507	11	5.75	190921_191002	p11_190921_191002_191002_a001	21	Interneuron	FALSE	FALSE
508	11	5.75	190921_191002	p11_190921_191002_191002_a001	22	Pyramidal	TRUE	FALSE
509	11	5.75	190921_191002	p11_190921_191002_191002_a001	23	Interneuron	FALSE	FALSE
510	11	5.75	190921_191002	p11_190921_191002_191002_a001	24	Pyramidal	FALSE	TRUE
511	11	5.75	190921_191002	p11_190921_191002_191002_a001	25	Pyramidal	FALSE	FALSE
512	11	5.75	190921_191002	p11_190921_191002_191002_a001	26	Pyramidal	TRUE	FALSE
513	11	5.75	190921_191002	p11_190921_191002_191002_a001	27	Pyramidal	FALSE	FALSE
514	11	5.75	190921_191002	p11_190921_191002_191002_a001	28	Interneuron	FALSE	FALSE
515	11	5.75	190921_191002	p11_190921_191002_191002_a001	29	Pyramidal	FALSE	FALSE
516	11	5.75	190921_191002	p11_190921_191002_191002_a001	30	Pyramidal	TRUE	FALSE
517	11	5.75	190921_191002	p11_190921_191002_191002_a001	31	Pyramidal	FALSE	FALSE
518	11	5.75	190921_191002	p11_190921_191002_191002_a001	32	Pyramidal	FALSE	FALSE
519	11	5.75	190921_191002	p11_190921_191002_191002_a001	33	Pyramidal	FALSE	TRUE
520	11	5.75	190921_191002	p11_190921_191002_191002_a001	34	Pyramidal	FALSE	TRUE
521	11	5.75	190921_191002	p11_190921_191002_191002_a001	35	Pyramidal	TRUE	FALSE
522	11	5.75	190921_191002	p11_190921_191002_191002_a001	36	Interneuron	TRUE	FALSE
523	11	5.75	190921_191002	p11_190921_191002_191002_a001	37	Interneuron	FALSE	TRUE
524	11	5.75	190921_191002	p11_190921_191002_191002_a001	38	Pyramidal	FALSE	FALSE
525	11	5.75	190921_191002	p11_190921_191002_191002_a001	39	Pyramidal	FALSE	FALSE
526	11	5.75	190921_191002	p11_190921_191002_191002_a001	40	Pyramidal	FALSE	FALSE
527	11	5.75	190921_191002	p11_190921_191002_191002_a001	41	Pyramidal	FALSE	TRUE
528	11	5.75	190921_191002	p11_190921_191002_191002_a001	42	Pyramidal	TRUE	FALSE
529	11	5.75	190921_191002	p11_190921_191002_191002_a001	43	Pyramidal	FALSE	FALSE
530	11	5.75	190921_191002	p11_190921_191002_191002_a001	44	Pyramidal	FALSE	FALSE
531	11	5.75	190921_191002	p11_190921_191002_191002_a001	45	Interneuron	FALSE	FALSE
532	11	5.75	190921_191002	p11_190921_191002_191002_a001	46	Pyramidal	FALSE	FALSE
533	11	5.75	190921_191002	p11_190921_191002_191002_a001	47	Pyramidal	FALSE	TRUE
534	11	5.75	190921_191002	p11_190921_191002_191002_a001	48	Pyramidal	FALSE	FALSE
535	11	5.75	190921_191002	p11_190921_191002_191002_a001	49	Pyramidal	TRUE	FALSE
536	11	5.75	190921_191002	p11_190921_191002_191002_a001	50	Pyramidal	FALSE	FALSE
537	11	5.75	190921_191002	p11_190921_191002_191002_a001	51	Pyramidal	FALSE	TRUE
538	11	5.75	190921_191002	p11_190921_191002_191002_a001	52	Interneuron	FALSE	FALSE
539	11	5.75	190921_191002	p11_190921_191002_191002_a001	53	Pyramidal	FALSE	FALSE
540	11	5.75	190921_191002	p11_190921_191002_191002_a001	54	Pyramidal	FALSE	FALSE
541	11	5.75	190921_191002	p11_190921_191002_191002_a001	55	Pyramidal	FALSE	FALSE
542	11	5.75	190921_191002	p11_190921_191002_191002_a001	56	Pyramidal	FALSE	TRUE
543	11	5.75	190921_191002	p11_190921_191002_191002_a001	57	Pyramidal	FALSE	TRUE
544	11	5.75	190921_191002	p11_190921_191002_191002_a001	58	Pyramidal	FALSE	TRUE
545	11	5.75	190921_191002	p11_190921_191002_191002_a001	59	Pyramidal	TRUE	FALSE
546	11	5.75	190921_191002	p11_190921_191002_191002_a001	60	Interneuron	FALSE	TRUE
547	11	5.75	190921_191002	p11_190921_191002_191002_a001	61	Pyramidal	FALSE	TRUE
548	11	5.75	190921_191002	p11_190921_191002_191002_a001	62	Pyramidal	FALSE	TRUE
549	11	5.75	190921_191002	p11_190921_191002_191002_a001	63	Interneuron	FALSE	FALSE
550	11	5.75	190921_191002	p11_190921_191002_191002_a001	64	Pyramidal	FALSE	TRUE
551	11	5.75	190921_191002	p11_190921_191002_191002_a001	65	Pyramidal	FALSE	TRUE
552	11	5.75	190921_191002	p11_190921_191002_191002_a001	66	Pyramidal	FALSE	TRUE
553	11	5.75	190921_191002	p11_190921_191002_191002_a001	67	Pyramidal	FALSE	FALSE
554	11	5.75	190921_191002	p11_190921_191002_191002_a001	68	Interneuron	TRUE	FALSE
555	11	5.75	190921_191002	p11_190921_191002_191002_a001	69	Pyramidal	FALSE	FALSE
556	11	5.75	190921_191002	p11_190921_191002_191002_a001	70	Pyramidal	FALSE	TRUE
557	11	5.75	190921_191002	p11_190921_191002_191002_a001	71	Pyramidal	FALSE	FALSE
558	11	5.75	190921_191002	p11_190921_191002_191002_a001	72	Interneuron	FALSE	FALSE
559	11	5.75	190921_191002	p11_190921_191002_191002_a001	73	Pyramidal	FALSE	FALSE
560	11	5.75	190921_191002	p11_190921_191002_191002_a001	74	Pyramidal	FALSE	TRUE
561	11	5.75	190921_191002	p11_190921_191002_191002_a001	75	Pyramidal	FALSE	TRUE
562	11	5.75	190921_191002	p11_190921_191002_191002_a001	76	Pyramidal	FALSE	FALSE
563	11	5.75	190921_191002	p11_190921_191002_191002_a001	77	Pyramidal	TRUE	FALSE
564	11	5.75	190921_191002	p11_190921_191002_191002_a001	78	Pyramidal	FALSE	TRUE
565	11	5.75	190921_191002	p11_190921_191002_191002_a001	79	Pyramidal	FALSE	FALSE
566	11	5.75	190921_191002	p11_190921_191002_191002_a001	80	Pyramidal	FALSE	FALSE
567	11	5.75	190921_191002	p11_190921_191002_191002_a001	81	Pyramidal	FALSE	TRUE
568	11	5.75	190921_191002	p11_190921_191002_191002_a001	82	Interneuron	TRUE	FALSE
569	11	5.75	190921_191002	p11_190921_191002_191002_a001	83	Interneuron	TRUE	FALSE
570	11	5.75	190921_191002	p11_190921_191002_191002_a001	84	Pyramidal	FALSE	FALSE
571	11	5.75	190921_191002	p11_190921_191002_191002_a001	85	Interneuron	FALSE	FALSE
572	11	5.75	190921_191002	p11_190921_191002_191002_a001	86	Pyramidal	FALSE	FALSE
573	11	5.75	190921_191002	p11_190921_191002_191002_a001	87	Pyramidal	FALSE	TRUE
574	11	5.75	190921_191002	p11_190921_191002_191002_a001	88	Interneuron	FALSE	FALSE
575	11	5.75	190921_191002	p11_190921_191002_191002_a001	89	Pyramidal	TRUE	FALSE
576	11	5.75	190921_191002	p11_190921_191002_191002_a001	90	Pyramidal	FALSE	FALSE
577	11	5.75	190921_191002	p11_190921_191002_191002_a001	91	Pyramidal	FALSE	FALSE
578	11	5.75	190921_191002	p11_190921_191002_191002_a001	92	Interneuron	TRUE	FALSE
579	11	5.75	190921_191002	p11_190921_191002_191002_a001	93	Pyramidal	FALSE	TRUE
580	11	5.75	190921_191002	p11_190921_191002_191002_a001	94	Pyramidal	FALSE	FALSE
581	11	5.75	190921_191002	p11_190921_191002_191002_a001	95	Pyramidal	FALSE	FALSE
582	11	5.75	190921_191002	p11_190921_191002_191002_a001	96	Interneuron	FALSE	FALSE
583	11	5.75	190921_191002	p11_190921_191002_191002_a001	97	Pyramidal	TRUE	FALSE
584	11	5.75	190921_191002	p11_190921_191002_191002_a001	98	Pyramidal	FALSE	FALSE
585	11	5.75	190921_191002	p11_190921_191002_191002_a001	99	Pyramidal	FALSE	FALSE
586	11	5.75	190921_191002	p11_190921_191002_191002_a001	100	Pyramidal	FALSE	TRUE
587	11	5.75	190921_191002	p11_190921_191002_191002_a001	101	Pyramidal	TRUE	FALSE
588	11	5.75	190921_191002	p11_190921_191002_191002_a001	102	Pyramidal	FALSE	FALSE
589	11	5.75	190921_191002	p11_190921_191002_191002_a001	103	Pyramidal	FALSE	TRUE
590	11	5.75	190921_191002	p11_190921_191002_191002_a001	104	Pyramidal	FALSE	TRUE
591	11	5.75	190921_191002	p11_190921_191002_191002_a001	105	Pyramidal	FALSE	TRUE
592	11	5.75	190921_191002	p11_190921_191002_191002_a001	106	Pyramidal	FALSE	FALSE
593	11	5.75	190921_191002	p11_190921_191002_191002_a001	107	Pyramidal	FALSE	FALSE
594	11	5.75	190921_191002	p11_190921_191002_191002_a001	108	Pyramidal	FALSE	FALSE
595	11	5.75	190921_191002	p11_190921_191002_191002_a001	109	Interneuron	FALSE	TRUE
596	11	5.75	190921_191002	p11_190921_191002_191002_a001	110	Pyramidal	FALSE	TRUE
597	11	5.75	190921_191002	p11_190921_191002_191002_a001	111	Pyramidal	FALSE	TRUE
598	11	5.75	190921_191002	p11_190921_191002_191002_a001	112	Interneuron	FALSE	FALSE
599	11	5.75	190921_191002	p11_190921_191002_191002_a001	113	Interneuron	FALSE	FALSE
600	11	5.75	190921_191002	p11_190921_191002_191002_a001	114	Pyramidal	FALSE	TRUE
601	11	5.75	190921_191002	p11_190921_191002_191002_a001	115	Pyramidal	FALSE	TRUE
602	11	5.75	190921_191002	p11_190921_191002_191002_a001	116	Pyramidal	FALSE	FALSE
603	11	5.75	190921_191002	p11_190921_191002_191002_a001	117	Pyramidal	FALSE	TRUE
604	11	5.75	190921_191002	p11_190921_191002_191002_a001	118	Pyramidal	FALSE	TRUE
605	11	5.75	190921_191002	p11_190921_191002_191002_a001	119	Pyramidal	FALSE	FALSE
606	11	5.75	190921_191002	p11_190921_191002_191002_a001	120	Pyramidal	FALSE	TRUE
607	11	5.75	190921_191002	p11_190921_191002_191002_a001	121	Pyramidal	FALSE	TRUE
608	11	5.75	190921_191002	p11_190921_191002_191002_a001	122	Pyramidal	TRUE	FALSE
609	11	5.75	190921_191002	p11_190921_191002_191002_a001	123	Pyramidal	TRUE	FALSE
610	11	5.75	190921_191002	p11_190921_191002_191002_a001	124	Pyramidal	FALSE	TRUE
611	11	5.75	190921_191002	p11_190921_191002_191002_a001	125	Interneuron	FALSE	FALSE
612	11	5.75	190921_191002	p11_190921_191002_191002_a001	126	Pyramidal	FALSE	TRUE
613	11	5.75	190921_191002	p11_190921_191002_191002_a001	127	Pyramidal	TRUE	FALSE
614	11	5.75	190921_191002	p11_190921_191002_191002_a001	128	Pyramidal	FALSE	TRUE
615	11	5.75	190921_191002	p11_190921_191002_191002_a001	129	Pyramidal	TRUE	FALSE
616	11	5.75	190921_191002	p11_190921_191002_191002_a001	130	Pyramidal	FALSE	FALSE
617	11	5.75	190921_191002	p11_190921_191002_191002_a001	131	Pyramidal	FALSE	TRUE
618	11	5.75	190921_191002	p11_190921_191002_191002_a001	132	Pyramidal	FALSE	TRUE
619	11	5.75	190921_191002	p11_190921_191002_191002_a001	133	Pyramidal	FALSE	FALSE
620	11	5.75	190921_191002	p11_190921_191002_191002_a001	134	Pyramidal	FALSE	TRUE
621	11	5.75	190921_191002	p11_190921_191002_191002_a001	135	Pyramidal	TRUE	FALSE
622	11	5.75	190921_191002	p11_190921_191002_191002_a001	136	Pyramidal	FALSE	TRUE
623	11	5.75	190921_191002	p11_190921_191002_191002_a001	137	Pyramidal	FALSE	TRUE
624	11	5.75	190921_191002	p11_190921_191002_191002_a001	138	Pyramidal	FALSE	FALSE
625	11	5.75	190921_191002	p11_190921_191002_191002_a001	139	Pyramidal	TRUE	FALSE
626	11	5.75	190921_191002	p11_190921_191002_191002_a001	140	Pyramidal	FALSE	TRUE
627	11	5.75	190921_191002	p11_190921_191002_191002_a001	141	Pyramidal	FALSE	TRUE
628	11	5.75	190921_191002	p11_190921_191002_191002_a001	142	Pyramidal	FALSE	TRUE
629	11	5.75	190921_191002	p11_190921_191002_191002_a001	143	Pyramidal	FALSE	FALSE
630	11	5.75	190921_191002	p11_190921_191002_191002_a001	144	Pyramidal	FALSE	TRUE
631	11	5.75	190921_191002	p11_190921_191002_191002_a001	145	Pyramidal	FALSE	TRUE
632	11	5.75	190921_191002	p11_190921_191002_191002_a001	146	Pyramidal	TRUE	FALSE
633	11	5.75	190921_191002	p11_190921_191002_191002_a001	147	Pyramidal	FALSE	TRUE
634	11	5.75	190921_191002	p11_190921_191002_191002_a001	148	Pyramidal	FALSE	TRUE
635	11	5.75	190921_191002	p11_190921_191002_191002_a001	149	Pyramidal	FALSE	FALSE
636	11	5.75	190921_191002	p11_190921_191002_191002_a001	150	Pyramidal	FALSE	FALSE
637	11	5.75	190921_191002	p11_190921_191002_191002_a001	151	Pyramidal	FALSE	FALSE
638	11	5.75	190921_191002	p11_190921_191002_191002_a001	152	Pyramidal	TRUE	FALSE
639	11	5.75	190921_191002	p11_190921_191002_191002_a001	153	Pyramidal	FALSE	TRUE
640	11	5.75	190921_191002	p11_190921_191002_191002_a001	154	Pyramidal	FALSE	TRUE
641	11	5.75	190921_191002	p11_190921_191002_191002_a001	155	Pyramidal	FALSE	TRUE
642	11	5.75	190921_191002	p11_190921_191002_191002_a001	156	Pyramidal	FALSE	TRUE
643	11	5.75	190921_191002	p11_190921_191002_191002_a001	157	Pyramidal	FALSE	TRUE
644	11	5.75	190921_191002	p11_190921_191002_191002_a001	158	Pyramidal	FALSE	FALSE
645	11	5.75	190921_191002	p11_190921_191002_191002_a001	159	Pyramidal	FALSE	FALSE
646	11	5.75	190921_191002	p11_190921_191002_191002_a001	160	Pyramidal	TRUE	FALSE
647	11	5.75	190921_191002	p11_190921_191002_191002_a001	161	Pyramidal	FALSE	TRUE
648	11	5.75	190921_191002	p11_190921_191002_191002_a001	162	Pyramidal	FALSE	TRUE
649	11	5.75	190921_191002	p11_190921_191002_191002_a001	163	Pyramidal	FALSE	TRUE
650	11	5.75	190921_191002	p11_190921_191002_191002_a001	164	Pyramidal	FALSE	FALSE
651	11	5.75	190921_191002	p11_190921_191002_191002_a001	165	Pyramidal	FALSE	FALSE
652	11	5.75	190921_191002	p11_190921_191002_191002_a001	166	Pyramidal	TRUE	FALSE
653	11	5.75	190921_191002	p11_190921_191002_191002_a001	167	Pyramidal	FALSE	FALSE
654	11	5.75	190921_191002	p11_190921_191002_191002_a001	168	Pyramidal	FALSE	FALSE
655	11	5.75	190921_191002	p11_190921_191002_191002_a001	169	Interneuron	FALSE	FALSE
656	11	5.75	190921_191002	p11_190921_191002_191002_a001	170	Pyramidal	FALSE	FALSE
657	11	5.75	190921_191002	p11_190921_191002_191002_a001	171	Pyramidal	FALSE	TRUE
658	11	5.75	190921_191002	p11_190921_191002_191002_a001	172	Pyramidal	FALSE	TRUE
659	11	5.75	190921_191002	p11_190921_191002_191002_a001	173	Pyramidal	FALSE	FALSE
660	11	5.75	190921_191002	p11_190921_191002_191002_a001	174	Pyramidal	FALSE	FALSE
661	11	5.75	190921_191002	p11_190921_191002_191002_a001	175	Pyramidal	FALSE	FALSE
662	11	5.75	190921_191002	p11_190921_191002_191002_a001	176	Pyramidal	FALSE	FALSE
663	11	5.75	190921_191002	p11_190921_191002_191002_a001	177	Interneuron	FALSE	TRUE
664	11	5.75	190921_191002	p11_190921_191002_191002_a001	178	Pyramidal	FALSE	FALSE
665	11	5.75	190921_191002	p11_190921_191002_191002_a001	179	Pyramidal	FALSE	TRUE
666	11	5.75	190921_191002	p11_190921_191002_191002_a001	180	Pyramidal	FALSE	FALSE
667	11	5.75	190921_191002	p11_190921_191002_191002_a001	181	Pyramidal	FALSE	TRUE
668	11	5.75	190921_191002	p11_190921_191002_191002_a001	182	Pyramidal	FALSE	TRUE
669	11	5.75	190921_191002	p11_190921_191002_191002_a001	183	Pyramidal	FALSE	TRUE
670	11	5.75	190921_191002	p11_190921_191002_191002_a001	184	Pyramidal	FALSE	FALSE
671	11	5.75	190921_191002	p11_190921_191002_191002_a001	185	Pyramidal	FALSE	FALSE
672	11	5.75	190921_191002	p11_190921_191002_191002_a001	186	Pyramidal	FALSE	FALSE
673	11	5.75	190921_191002	p11_190921_191002_191002_a001	187	Pyramidal	FALSE	FALSE
674	11	5.75	190921_191002	p11_190921_191002_191002_a001	188	Pyramidal	FALSE	TRUE
675	11	5.75	190921_191002	p11_190921_191002_191002_a001	189	Pyramidal	FALSE	FALSE
676	11	5.75	190921_191002	p11_190921_191002_191002_a001	190	Pyramidal	FALSE	TRUE
677	11	5.75	190921_191002	p11_190921_191002_191002_a001	191	Pyramidal	FALSE	TRUE
678	11	5.75	190921_191002	p11_190921_191002_191002_a001	192	Pyramidal	FALSE	FALSE
679	11	5.75	190921_191002	p11_190921_191002_191002_a001	193	Pyramidal	FALSE	TRUE
680	11	5.75	190921_191002	p11_190921_191002_191002_a001	194	Pyramidal	FALSE	FALSE
681	11	5.75	190921_191002	p11_190921_191002_191002_a001	195	Interneuron	TRUE	FALSE
682	11	5.75	190921_191002	p11_190921_191002_191002_a001	196	Pyramidal	FALSE	FALSE
683	11	5.75	190921_191002	p11_190921_191002_191002_a001	197	Pyramidal	FALSE	FALSE
684	11	5.75	190921_191002	p11_190921_191002_191002_a001	198	Pyramidal	TRUE	FALSE
685	11	5.75	190921_191002	p11_190921_191002_191002_a001	199	Interneuron	FALSE	FALSE
686	11	5.75	190921_191002	p11_190921_191002_191002_a001	200	Pyramidal	FALSE	TRUE
687	11	5.75	190921_191002	p11_190921_191002_191002_a001	201	Pyramidal	FALSE	FALSE
688	11	5.75	190921_191002	p11_190921_191002_191002_a001	202	Pyramidal	FALSE	TRUE
689	11	5.75	190921_191002	p11_190921_191002_191002_a001	203	Pyramidal	FALSE	TRUE
690	11	5.75	190921_191002	p11_190921_191002_191002_a001	204	Pyramidal	FALSE	FALSE
691	11	5.75	190921_191002	p11_190921_191002_191002_a001	205	Pyramidal	FALSE	FALSE
692	11	5.75	190921_191002	p11_190921_191002_191002_a001	206	Pyramidal	FALSE	TRUE
693	11	5.75	190921_191002	p11_190921_191002_191002_a001	207	Pyramidal	FALSE	FALSE
694	11	5.75	190921_191002	p11_190921_191002_191002_a001	208	Pyramidal	FALSE	TRUE
695	11	5.75	190921_191002	p11_190921_191002_191002_a001	209	Pyramidal	FALSE	FALSE
696	11	5.75	190921_191002	p11_190921_191002_191002_a001	210	Pyramidal	FALSE	TRUE
697	11	5.75	190921_191002	p11_190921_191002_191002_a001	211	Pyramidal	FALSE	FALSE
698	11	5.75	190921_191002	p11_190921_191002_191002_a001	212	Pyramidal	FALSE	TRUE
699	11	5.75	190921_191002	p11_190921_191002_191002_a001	213	Pyramidal	FALSE	FALSE
700	11	5.75	190921_191002	p11_190921_191002_191002_a001	214	Pyramidal	FALSE	FALSE
701	11	5.75	190921_191002	p11_190921_191002_191002_a001	215	Interneuron	FALSE	FALSE
702	11	5.75	190921_191002	p11_190921_191002_191002_a001	216	Interneuron	FALSE	FALSE
703	11	5.75	190921_191002	p11_190921_191002_191002_a001	217	Pyramidal	FALSE	TRUE
704	11	5.75	190921_191002	p11_190921_191002_191002_a001	218	Interneuron	FALSE	TRUE
705	11	5.75	190921_191002	p11_190921_191002_191002_a001	219	Pyramidal	FALSE	FALSE
706	11	5.75	190921_191002	p11_190921_191002_191002_a001	220	Pyramidal	FALSE	TRUE
707	11	5.75	190921_191002	p11_190921_191002_191002_a001	221	Pyramidal	FALSE	TRUE
708	11	5.75	190921_191002	p11_190921_191002_191002_a001	222	Pyramidal	FALSE	TRUE
709	11	5.75	190921_191002	p11_190921_191002_191002_a001	223	Interneuron	FALSE	FALSE
710	11	5.75	190921_191002	p11_190921_191002_191002_a001	224	Pyramidal	FALSE	TRUE
711	11	5.75	190921_191002	p11_190921_191002_191002_a001	225	Pyramidal	FALSE	FALSE
712	11	5.75	190921_191002	p11_190921_191002_191002_a001	226	Pyramidal	FALSE	TRUE
713	11	5.75	190921_191002	p11_190921_191002_191002_a001	227	Pyramidal	FALSE	FALSE
714	11	5.75	190921_191002	p11_190921_191002_191002_a001	228	Pyramidal	FALSE	FALSE
715	11	5.75	190921_191002	p11_190921_191002_191002_a001	229	Pyramidal	FALSE	TRUE
716	11	5.75	190921_191002	p11_190921_191002_191002_a001	230	Pyramidal	FALSE	TRUE
717	11	5.75	190921_191002	p11_190921_191002_191002_a001	231	Pyramidal	FALSE	TRUE
718	11	5.75	190921_191002	p11_190921_191002_191002_a001	232	Pyramidal	FALSE	TRUE
719	11	5.75	190921_191002	p11_190921_191002_191002_a001	233	Pyramidal	FALSE	TRUE
720	11	5.75	190921_191002	p11_190921_191002_191002_a001	234	Pyramidal	FALSE	FALSE
721	11	5.75	190921_191002	p11_190921_191002_191002_a001	235	Pyramidal	TRUE	FALSE
722	11	5.75	190921_191002	p11_190921_191002_191002_a001	236	Pyramidal	FALSE	FALSE
723	11	5.75	190921_191002	p11_190921_191002_191002_a001	237	Pyramidal	FALSE	FALSE
724	11	5.75	190921_191002	p11_190921_191002_191002_a001	238	Pyramidal	FALSE	FALSE
725	11	5.75	190921_191002	p11_190921_191002_191002_a001	239	Pyramidal	FALSE	FALSE
726	11	5.75	190921_191002	p11_190921_191002_191002_a001	240	Pyramidal	FALSE	FALSE
727	11	5.75	190921_191002	p11_190921_191002_191002_a001	241	Pyramidal	TRUE	FALSE
728	11	5.75	190921_191002	p11_190921_191002_191002_a001	242	Pyramidal	FALSE	TRUE
729	11	5.75	190921_191002	p11_190921_191002_191002_a001	243	Pyramidal	FALSE	TRUE
730	11	5.75	190921_191002	p11_190921_191002_191002_a001	244	Pyramidal	FALSE	FALSE
731	11	5.75	190921_191002	p11_190921_191002_191002_a001	245	Pyramidal	FALSE	TRUE
732	11	5.75	190921_191002	p11_190921_191002_191002_a001	246	Interneuron	FALSE	FALSE
733	11	5.75	190921_191002	p11_190921_191002_191002_a001	247	Pyramidal	FALSE	FALSE
734	11	5.75	190921_191002	p11_190921_191002_191002_a001	248	Pyramidal	FALSE	TRUE
735	11	5.75	190921_191002	p11_190921_191002_191002_a001	249	Pyramidal	FALSE	TRUE
736	11	5.75	190921_191002	p11_190921_191002_191002_a001	250	Pyramidal	FALSE	TRUE
737	11	5.75	190921_191002	p11_190921_191002_191002_a001	251	Pyramidal	FALSE	FALSE
738	11	5.75	190921_191002	p11_190921_191002_191002_a001	252	Pyramidal	FALSE	TRUE
739	11	5.75	190921_191002	p11_190921_191002_191002_a001	253	Pyramidal	FALSE	FALSE
740	11	5.75	190921_191002	p11_190921_191002_191002_a001	254	Pyramidal	FALSE	TRUE
741	11	5.75	190921_191002	p11_190921_191002_191002_a001	255	Pyramidal	FALSE	TRUE
742	11	5.75	190921_191002	p11_190921_191002_191002_a001	256	Pyramidal	FALSE	FALSE
743	11	5.75	190921_191002	p11_190921_191002_191002_a001	257	Pyramidal	FALSE	FALSE
744	11	5.75	190921_191002	p11_190921_191002_191002_a001	258	Pyramidal	FALSE	FALSE
745	11	5.75	190921_191002	p11_190921_191002_191002_a001	259	Pyramidal	FALSE	TRUE
746	11	5.75	190921_191002	p11_190921_191002_191002_a001	260	Pyramidal	FALSE	TRUE
747	11	5.75	190921_191002	p11_190921_191002_191002_a001	261	Pyramidal	FALSE	TRUE
748	11	5.75	190921_191002	p11_190921_191002_191002_a001	262	Pyramidal	FALSE	FALSE
749	11	5.75	190921_191002	p11_190921_191002_191002_a001	263	Pyramidal	FALSE	TRUE
750	11	5.75	190921_191002	p11_190921_191002_191002_a001	264	Pyramidal	FALSE	TRUE
751	11	5.75	190921_191002	p11_190921_191002_191002_a001	265	Pyramidal	TRUE	FALSE
752	11	5.75	190921_191002	p11_190921_191002_191002_a001	266	Pyramidal	TRUE	FALSE
753	11	5.75	190921_191002	p11_190921_191002_191002_a001	267	Pyramidal	FALSE	TRUE
754	11	5.75	190921_191002	p11_190921_191002_191002_a001	268	Pyramidal	FALSE	FALSE
755	11	5.75	190921_191002	p11_190921_191002_191002_a001	269	Pyramidal	FALSE	FALSE
756	11	5.75	190921_191002	p11_190921_191002_191002_a001	270	Pyramidal	FALSE	TRUE
757	11	5.75	190921_191002	p11_190921_191002_191002_a001	271	Interneuron	FALSE	FALSE
758	11	5.75	190921_191002	p11_190921_191002_191002_a001	272	Interneuron	FALSE	FALSE
759	11	5.75	190921_191002	p11_190921_191002_191002_a001	273	Interneuron	TRUE	FALSE
760	11	5.75	190921_191002	p11_190921_191002_191002_a001	274	Pyramidal	FALSE	FALSE
761	11	5.75	190921_191002	p11_190921_191002_191002_a001	275	Pyramidal	FALSE	FALSE
762	11	5.75	190921_191002	p11_190921_191002_191002_a001	276	Pyramidal	FALSE	TRUE
763	11	5.75	190921_191002	p11_190921_191002_191002_a001	277	Pyramidal	FALSE	TRUE
764	11	5.75	190921_191002	p11_190921_191002_191002_a001	278	Pyramidal	TRUE	FALSE
765	11	5.75	190921_191002	p11_190921_191002_191002_a001	279	Pyramidal	FALSE	TRUE
766	11	5.75	190921_191002	p11_190921_191002_191002_a001	280	Pyramidal	FALSE	TRUE
767	11	5.75	190921_191002	p11_190921_191002_191002_a001	281	Pyramidal	FALSE	TRUE
768	11	5.75	190921_191002	p11_190921_191002_191002_a001	282	Pyramidal	FALSE	TRUE
769	11	5.75	190921_191002	p11_190921_191002_191002_a001	283	Pyramidal	FALSE	FALSE
770	11	5.75	190921_191002	p11_190921_191002_191002_a001	284	Pyramidal	FALSE	TRUE
771	11	5.75	190921_191002	p11_190921_191002_191002_a001	285	Pyramidal	FALSE	FALSE
772	11	5.75	190921_191002	p11_190921_191002_191002_a001	286	Pyramidal	FALSE	TRUE
773	11	5.75	190921_191002	p11_190921_191002_191002_a001	287	Pyramidal	FALSE	TRUE
774	11	5.75	190921_191002	p11_190921_191002_191002_a001	288	Pyramidal	FALSE	TRUE
775	11	5.75	190921_191002	p11_190921_191002_191002_a001	289	Pyramidal	FALSE	FALSE
776	11	5.75	190921_191002	p11_190921_191002_191002_a001	290	Pyramidal	FALSE	FALSE
777	11	5.75	190921_191002	p11_190921_191002_191002_a001	291	Pyramidal	FALSE	TRUE
778	11	5.75	190921_191002	p11_190921_191002_191002_a001	292	Pyramidal	FALSE	FALSE
779	11	5.75	190921_191002	p11_190921_191002_191002_a001	293	Pyramidal	FALSE	TRUE
780	11	5.75	190921_191002	p11_190921_191002_191002_a001	294	Pyramidal	FALSE	FALSE
781	11	5.75	190921_191002	p11_190921_191002_191002_a001	295	Pyramidal	FALSE	TRUE
782	11	5.75	190921_191002	p11_190921_191002_191002_a001	296	Pyramidal	FALSE	TRUE
783	11	5.75	190921_191002	p11_190921_191002_191002_a001	297	Pyramidal	FALSE	TRUE
784	11	5.75	190921_191002	p11_190921_191002_191002_a001	298	Pyramidal	FALSE	FALSE
785	11	5.75	190921_191002	p11_190921_191002_191002_a001	299	Pyramidal	FALSE	FALSE
786	11	5.75	190921_191002	p11_190921_191002_191002_a001	300	Interneuron	FALSE	FALSE
787	11	5.75	190921_191002	p11_190921_191002_191002_a001	301	Pyramidal	FALSE	TRUE
788	11	5.75	190921_191002	p11_190921_191002_191002_a001	302	Pyramidal	FALSE	TRUE
789	11	5.75	190921_191002	p11_190921_191002_191002_a001	303	Pyramidal	FALSE	TRUE
790	11	5.75	190921_191002	p11_190921_191002_191002_a001	304	Pyramidal	FALSE	FALSE
791	11	5.75	190921_191002	p11_190921_191002_191002_a001	305	Pyramidal	FALSE	FALSE
792	11	5.75	190921_191002	p11_190921_191002_191002_a001	306	Pyramidal	FALSE	TRUE
793	11	5.75	190921_191002	p11_190921_191002_191002_a001	307	Pyramidal	FALSE	TRUE
794	11	5.75	190921_191002	p11_190921_191002_191002_a001	308	Pyramidal	FALSE	FALSE
795	11	5.75	190921_191002	p11_190921_191002_191002_a001	309	Pyramidal	FALSE	TRUE
796	11	5.75	190921_191002	p11_190921_191002_191002_a001	310	Pyramidal	FALSE	TRUE
797	11	5.75	190921_191002	p11_190921_191002_191002_a001	311	Pyramidal	FALSE	TRUE
798	11	5.75	190921_191002	p11_190921_191002_191002_a001	312	Pyramidal	FALSE	FALSE
799	11	5.75	190921_191002	p11_190921_191002_191002_a001	313	Pyramidal	FALSE	FALSE
800	11	5.75	190921_191002	p11_190921_191002_191002_a001	314	Pyramidal	FALSE	FALSE
801	11	5.75	190921_191002	p11_190921_191002_191002_a001	315	Pyramidal	FALSE	TRUE
802	11	5.75	190921_191002	p11_190921_191002_191002_a001	316	Pyramidal	FALSE	TRUE
803	11	5.75	190921_191002	p11_190921_191002_191002_a001	317	Pyramidal	FALSE	TRUE
804	11	5.75	190921_191002	p11_190921_191002_191002_a001	318	Pyramidal	FALSE	TRUE
805	11	5.75	190921_191002	p11_190921_191002_191002_a001	319	Pyramidal	FALSE	FALSE
806	11	5.75	190921_191002	p11_190921_191002_191002_a001	320	Pyramidal	FALSE	TRUE
807	11	5.75	190921_191002	p11_190921_191002_191002_a001	321	Pyramidal	FALSE	FALSE
808	11	5.75	190921_191002	p11_190921_191002_191002_a001	322	Pyramidal	FALSE	TRUE
809	11	5.75	190921_191002	p11_190921_191002_191002_a001	323	Pyramidal	FALSE	TRUE
810	11	5.75	190921_191002	p11_190921_191002_191002_a001	324	Pyramidal	FALSE	TRUE
811	11	5.75	190921_191002	p11_190921_191002_191002_a001	325	Pyramidal	FALSE	TRUE
812	11	5.75	190921_191002	p11_190921_191002_191002_a001	326	Pyramidal	FALSE	TRUE
813	11	5.75	190921_191002	p11_190921_191002_191002_a001	327	Pyramidal	FALSE	TRUE
814	11	5.75	190921_191002	p11_190921_191002_191002_a001	328	Pyramidal	FALSE	TRUE
815	11	5.75	190921_191002	p11_190921_191002_191002_a001	329	Pyramidal	FALSE	TRUE
816	11	5.75	190921_191002	p11_190921_191002_191002_a001	330	Pyramidal	FALSE	TRUE
817	11	5.75	190921_191002	p11_190921_191002_191002_a001	331	Pyramidal	FALSE	TRUE
818	11	5.75	190921_191002	p11_190921_191002_191002_a001	332	Pyramidal	FALSE	TRUE
819	11	5.75	190921_191002	p11_190921_191002_191002_a001	333	Pyramidal	FALSE	TRUE
820	11	5.75	190921_191002	p11_190921_191002_191002_a001	334	Pyramidal	FALSE	FALSE
821	11	5.75	190921_191002	p11_190921_191002_191002_a001	335	Interneuron	FALSE	FALSE
822	11	5.75	190921_191002	p11_190921_191002_191002_a001	336	Pyramidal	FALSE	TRUE
823	11	5.75	190921_191002	p11_190921_191002_191002_a001	337	Pyramidal	FALSE	FALSE
824	11	5.75	190921_191002	p11_190921_191002_191002_a001	338	Pyramidal	FALSE	TRUE
825	11	5.75	190921_191002	p11_190921_191002_191002_a001	339	Pyramidal	FALSE	TRUE
826	11	5.75	190921_191002	p11_190921_191002_191002_a001	340	Pyramidal	FALSE	FALSE
827	11	5.75	190921_191002	p11_190921_191002_191002_a001	341	Pyramidal	FALSE	TRUE
828	11	5.75	190921_191002	p11_190921_191002_191002_a001	342	Pyramidal	FALSE	FALSE
829	11	5.75	190921_191002	p11_190921_191002_191002_a001	343	Pyramidal	FALSE	TRUE
830	11	5.75	190921_191002	p11_190921_191002_191002_a001	344	Pyramidal	FALSE	FALSE
831	11	5.75	190921_191002	p11_190921_191002_191002_a001	345	Pyramidal	TRUE	FALSE
832	11	5.75	190921_191002	p11_190921_191002_191002_a001	346	Pyramidal	FALSE	FALSE
833	11	5.75	190921_191002	p11_190921_191002_191002_a001	347	Pyramidal	FALSE	TRUE
834	11	5.75	190921_191002	p11_190921_191002_191002_a001	348	Pyramidal	FALSE	FALSE
835	11	5.75	190921_191002	p11_190921_191002_191002_a001	349	Pyramidal	FALSE	TRUE
836	11	5.75	190921_191002	p11_190921_191002_191002_a001	350	Pyramidal	FALSE	FALSE
837	11	5.75	190921_191002	p11_190921_191002_191002_a001	351	Pyramidal	FALSE	TRUE
838	11	5.75	190921_191002	p11_190921_191002_191002_a001	352	Pyramidal	FALSE	TRUE
839	11	5.75	190921_191002	p11_190921_191002_191002_a001	353	Pyramidal	FALSE	TRUE
840	11	5.75	190921_191002	p11_190921_191002_191002_a001	354	Pyramidal	FALSE	FALSE
841	11	5.75	190921_191002	p11_190921_191002_191002_a001	355	Pyramidal	FALSE	TRUE
842	11	5.75	190921_191002	p11_190921_191002_191002_a001	356	Pyramidal	FALSE	TRUE
843	11	5.75	190921_191002	p11_190921_191002_191002_a001	357	Pyramidal	FALSE	FALSE
844	11	5.75	190921_191002	p11_190921_191002_191002_a001	358	Pyramidal	FALSE	TRUE
845	11	5.75	190921_191002	p11_190921_191002_191002_a001	359	Pyramidal	FALSE	FALSE
846	11	5.75	190921_191002	p11_190921_191002_191002_a001	360	Pyramidal	FALSE	TRUE
847	11	5.75	190921_191002	p11_190921_191002_191002_a001	361	Pyramidal	FALSE	FALSE
848	11	5.75	190921_191002	p11_190921_191002_191002_a001	362	Pyramidal	FALSE	TRUE
849	11	5.75	190921_191002	p11_190921_191002_191002_a001	363	Pyramidal	FALSE	FALSE
850	11	5.75	190921_191002	p11_190921_191002_191002_a001	364	Pyramidal	TRUE	FALSE
851	11	5.75	190921_191002	p11_190921_191002_191002_a001	365	Pyramidal	FALSE	TRUE
852	11	5.75	190921_191002	p11_190921_191002_191002_a001	366	Pyramidal	FALSE	TRUE
853	11	5.75	190921_191002	p11_190921_191002_191002_a001	367	Interneuron	FALSE	FALSE
854	11	5.75	190921_191002	p11_190921_191002_191002_a001	368	Pyramidal	FALSE	TRUE
855	11	5.75	190921_191002	p11_190921_191002_191002_a001	369	Pyramidal	FALSE	TRUE
856	11	5.75	190921_191002	p11_190921_191002_191002_a001	370	Pyramidal	FALSE	TRUE
857	11	5.75	190921_191002	p11_190921_191002_191002_a001	371	Pyramidal	FALSE	TRUE
858	11	5.75	190921_191002	p11_190921_191002_191002_a001	372	Pyramidal	FALSE	FALSE
859	11	5.75	190921_191002	p11_190921_191002_191002_a001	373	Pyramidal	FALSE	TRUE
860	11	5.75	190921_191002	p11_190921_191002_191002_a001	374	Pyramidal	FALSE	FALSE
861	11	5.75	190921_191002	p11_190921_191002_191002_a001	375	Pyramidal	FALSE	TRUE
862	11	5.75	190921_191002	p11_190921_191002_191002_a001	376	Pyramidal	FALSE	TRUE
863	11	5.75	190921_191002	p11_190921_191002_191002_a001	377	Pyramidal	FALSE	FALSE
864	11	5.75	190921_191002	p11_190921_191002_191002_a001	378	Pyramidal	FALSE	FALSE
865	11	5.75	190921_191002	p11_190921_191002_191002_a001	379	Interneuron	FALSE	FALSE
866	11	5.75	190921_191002	p11_190921_191002_191002_a001	380	Pyramidal	FALSE	FALSE
867	11	5.75	190921_191002	p11_190921_191002_191002_a001	381	Pyramidal	FALSE	TRUE
868	11	5.75	190921_191002	p11_190921_191002_191002_a001	382	Pyramidal	FALSE	TRUE
869	11	5.75	190921_191002	p11_190921_191002_191002_a001	383	Pyramidal	FALSE	FALSE
870	11	5.75	190921_191002	p11_190921_191002_191002_a001	384	Pyramidal	FALSE	TRUE
871	11	5.75	190921_191002	p11_190921_191002_191002_a001	385	Pyramidal	TRUE	FALSE
872	11	5.75	190921_191002	p11_190921_191002_191002_a001	386	Interneuron	FALSE	FALSE
873	11	5.75	190921_191002	p11_190921_191002_191002_a001	387	Pyramidal	FALSE	TRUE
874	11	5.75	190921_191002	p11_190921_191002_191002_a001	388	Pyramidal	FALSE	TRUE
875	11	5.75	190921_191002	p11_190921_191002_191002_a001	389	Pyramidal	FALSE	TRUE
876	11	5.75	190921_191002	p11_190921_191002_191002_a001	390	Pyramidal	FALSE	FALSE
877	11	5.75	190921_191002	p11_190921_191002_191002_a001	391	Pyramidal	FALSE	TRUE
878	11	5.75	190921_191002	p11_190921_191002_191002_a001	392	Pyramidal	FALSE	TRUE
879	11	5.75	190921_191002	p11_190921_191002_191002_a001	393	Pyramidal	FALSE	FALSE
880	11	5.75	190921_191002	p11_190921_191002_191002_a001	394	Interneuron	FALSE	FALSE
881	11	5.75	190921_191002	p11_190921_191002_191002_a001	395	Pyramidal	FALSE	TRUE
882	11	5.75	190921_191002	p11_190921_191002_191002_a001	396	Pyramidal	FALSE	TRUE
883	11	5.75	190921_191002	p11_190921_191002_191002_a001	397	Pyramidal	FALSE	TRUE
884	11	5.75	190921_191002	p11_190921_191002_191002_a001	398	Pyramidal	FALSE	TRUE
885	11	5.75	190921_191002	p11_190921_191002_191002_a001	399	Pyramidal	FALSE	TRUE
886	11	5.75	190921_191002	p11_190921_191002_191002_a001	400	Pyramidal	FALSE	FALSE
887	11	5.75	190921_191002	p11_190921_191002_191002_a001	401	Pyramidal	FALSE	TRUE
888	11	5.75	190921_191002	p11_190921_191002_191002_a001	402	Pyramidal	FALSE	TRUE
889	11	5.75	190921_191002	p11_190921_191002_191002_a001	403	Pyramidal	FALSE	FALSE
890	11	5.75	190921_191002	p11_190921_191002_191002_a001	404	Pyramidal	FALSE	FALSE
891	11	5.75	190921_191002	p11_190921_191002_191002_a001	405	Pyramidal	FALSE	FALSE
892	11	5.75	190921_191002	p11_190921_191002_191002_a001	406	Pyramidal	FALSE	TRUE
893	11	5.75	190921_191002	p11_190921_191002_191002_a001	407	Pyramidal	FALSE	TRUE
894	11	5.75	190921_191002	p11_190921_191002_191002_a001	408	Pyramidal	FALSE	TRUE
895	11	5.75	190921_191002	p11_190921_191002_191002_a001	409	Pyramidal	FALSE	TRUE
896	11	5.75	190921_191002	p11_190921_191002_191002_a001	410	Pyramidal	FALSE	TRUE
897	11	5.75	190921_191002	p11_190921_191002_191002_a001	411	Pyramidal	FALSE	TRUE
898	11	5.75	190921_191002	p11_190921_191002_191002_a001	412	Pyramidal	FALSE	TRUE
899	11	5.75	190921_191002	p11_190921_191002_191002_a001	413	Pyramidal	FALSE	FALSE
900	11	5.75	190921_191002	p11_190921_191002_191002_a001	414	Pyramidal	FALSE	TRUE
901	11	5.75	190921_191002	p11_190921_191002_191002_a001	415	Pyramidal	TRUE	FALSE
902	11	5.75	190921_191002	p11_190921_191002_191002_a001	416	Pyramidal	FALSE	FALSE
903	11	5.75	190921_191002	p11_190921_191002_191002_a001	417	Pyramidal	FALSE	FALSE
904	11	5.75	190921_191002	p11_190921_191002_191002_a001	418	Pyramidal	FALSE	FALSE
905	11	5.75	190921_191002	p11_190921_191002_191002_a001	419	Interneuron	FALSE	FALSE
906	11	5.75	190921_191002	p11_190921_191002_191002_a001	420	Pyramidal	FALSE	TRUE
907	11	5.75	190921_191002	p11_190921_191002_191002_a001	421	Pyramidal	FALSE	TRUE
908	11	5.75	190921_191002	p11_190921_191002_191002_a001	422	Pyramidal	FALSE	TRUE
909	11	5.75	190921_191002	p11_190921_191002_191002_a001	423	Pyramidal	FALSE	TRUE
910	11	5.75	190921_191002	p11_190921_191002_191002_a001	424	Pyramidal	FALSE	FALSE
911	11	5.75	190921_191002	p11_190921_191002_191002_a001	425	Interneuron	FALSE	TRUE
912	11	5.75	190921_191002	p11_190921_191002_191002_a001	426	Pyramidal	FALSE	TRUE
913	11	5.75	190921_191002	p11_190921_191002_191002_a001	427	Pyramidal	FALSE	FALSE
914	11	5.75	190921_191002	p11_190921_191002_191002_a001	428	Interneuron	FALSE	FALSE
915	11	5.75	190921_191002	p11_190921_191002_191002_a001	429	Pyramidal	FALSE	TRUE
916	11	5.75	190921_191002	p11_190921_191002_191002_a001	430	Pyramidal	FALSE	TRUE
917	11	5.75	190921_191002	p11_190921_191002_191002_a001	431	Pyramidal	FALSE	FALSE
918	11	5.75	190921_191002	p11_190921_191002_191002_a001	432	Pyramidal	FALSE	FALSE
919	11	5.75	190921_191002	p11_190921_191002_191002_a001	433	Interneuron	TRUE	FALSE
920	11	5.75	190921_191002	p11_190921_191002_191002_a001	434	Pyramidal	FALSE	FALSE
921	11	5.75	190921_191002	p11_190921_191002_191002_a001	435	Pyramidal	FALSE	FALSE
922	11	5.75	190921_191002	p11_190921_191002_191002_a001	436	Pyramidal	FALSE	FALSE
923	11	5.75	190921_191002	p11_190921_191002_191002_a001	437	Pyramidal	FALSE	FALSE
924	11	5.75	190921_191002	p11_190921_191002_191002_a001	438	Pyramidal	FALSE	TRUE
925	11	5.75	190921_191002	p11_190921_191002_191002_a001	439	Pyramidal	FALSE	TRUE
926	11	5.75	190921_191002	p11_190921_191002_191002_a001	440	Pyramidal	FALSE	FALSE
927	11	5.75	190921_191002	p11_190921_191002_191002_a001	441	Pyramidal	FALSE	FALSE
928	11	5.75	190921_191002	p11_190921_191002_191002_a001	442	Pyramidal	FALSE	TRUE
929	11	5.75	190921_191002	p11_190921_191002_191002_a001	443	Pyramidal	FALSE	TRUE
930	11	5.75	190921_191002	p11_190921_191002_191002_a001	444	Interneuron	FALSE	FALSE
931	11	5.75	190921_191002	p11_190921_191002_191002_a001	445	Pyramidal	FALSE	TRUE
932	11	5.75	190921_191002	p11_190921_191002_191002_a001	446	Pyramidal	FALSE	TRUE
933	11	5.75	190921_191002	p11_190921_191002_191002_a001	447	Pyramidal	FALSE	TRUE
934	11	5.75	190921_191002	p11_190921_191002_191002_a001	448	Pyramidal	FALSE	TRUE
935	11	5.75	190921_191002	p11_190921_191002_191002_a001	449	Pyramidal	FALSE	TRUE
936	11	5.75	190921_191002	p11_190921_191002_191002_a001	450	Pyramidal	FALSE	TRUE
937	11	5.75	190921_191002	p11_190921_191002_191002_a001	451	Pyramidal	FALSE	FALSE
938	11	5.75	190921_191002	p11_190921_191002_191002_a001	452	Pyramidal	FALSE	FALSE
939	11	5.75	190921_191002	p11_190921_191002_191002_a001	453	Pyramidal	FALSE	TRUE
940	11	5.75	190921_191002	p11_190921_191002_191002_a001	454	Pyramidal	FALSE	FALSE
941	11	5.75	190921_191002	p11_190921_191002_191002_a001	455	Pyramidal	FALSE	TRUE
942	11	5.75	190921_191002	p11_190921_191002_191002_a001	456	Pyramidal	FALSE	TRUE
943	11	5.75	190921_191002	p11_190921_191002_191002_a001	457	Interneuron	FALSE	FALSE
944	11	5.75	190921_191002	p11_190921_191002_191002_a001	458	Pyramidal	FALSE	TRUE
945	11	5.75	190921_191002	p11_190921_191002_191002_a001	459	Pyramidal	FALSE	TRUE
946	11	5.75	190921_191002	p11_190921_191002_191002_a001	460	Pyramidal	FALSE	TRUE
947	11	5.75	190921_191002	p11_190921_191002_191002_a001	461	Pyramidal	FALSE	TRUE
948	11	5.75	190921_191002	p11_190921_191002_191002_a001	462	Pyramidal	FALSE	FALSE
949	11	5.75	190921_191002	p11_190921_191002_191002_a001	463	Pyramidal	FALSE	TRUE
950	11	5.75	190921_191002	p11_190921_191002_191002_a001	464	Pyramidal	FALSE	TRUE
951	11	5.75	190921_191002	p11_190921_191002_191002_a001	465	Pyramidal	FALSE	FALSE
952	11	5.75	190921_191002	p11_190921_191002_191002_a001	466	Pyramidal	FALSE	TRUE
953	11	5.75	190921_191002	p11_190921_191002_191002_a001	467	Interneuron	FALSE	TRUE
954	11	5.75	190921_191002	p11_190921_191002_191002_a001	468	Pyramidal	FALSE	TRUE
955	11	5.75	190921_191002	p11_190921_191002_191002_a001	469	Pyramidal	FALSE	TRUE
956	11	5.75	190921_191002	p11_190921_191002_191002_a001	470	Pyramidal	FALSE	TRUE
957	11	5.75	190921_191002	p11_190921_191002_191002_a001	471	Pyramidal	TRUE	FALSE
958	11	5.75	190921_191002	p11_190921_191002_191002_a001	472	Pyramidal	FALSE	FALSE
959	11	5.75	190921_191002	p11_190921_191002_191002_a001	473	Pyramidal	FALSE	TRUE
960	11	5.75	190921_191002	p11_190921_191002_191002_a001	474	Pyramidal	FALSE	TRUE
961	11	5.75	190921_191002	p11_190921_191002_191002_a001	475	Pyramidal	TRUE	FALSE
962	11	5.75	190921_191002	p11_190921_191002_191002_a001	476	Pyramidal	TRUE	FALSE
963	11	5.75	190921_191002	p11_190921_191002_191002_a001	477	Pyramidal	FALSE	TRUE
964	11	5.75	190921_191002	p11_190921_191002_191002_a001	478	Pyramidal	FALSE	FALSE
965	11	5.75	190921_191002	p11_190921_191002_191002_a001	479	Pyramidal	FALSE	TRUE
966	11	5.75	190921_191002	p11_190921_191002_191002_a001	480	Pyramidal	FALSE	FALSE
967	11	5.75	190921_191002	p11_190921_191002_191002_a001	481	Pyramidal	FALSE	FALSE
968	11	5.75	190921_191002	p11_190921_191002_191002_a001	482	Pyramidal	FALSE	TRUE
969	11	5.75	190921_191002	p11_190921_191002_191002_a001	483	Pyramidal	FALSE	FALSE
970	11	5.75	190921_191002	p11_190921_191002_191002_a001	484	Pyramidal	FALSE	TRUE
971	11	5.75	190921_191002	p11_190921_191002_191002_a001	485	Pyramidal	FALSE	FALSE
972	11	5.75	190921_191002	p11_190921_191002_191002_a001	486	Pyramidal	FALSE	TRUE
973	11	5.75	190921_191002	p11_190921_191002_191002_a001	487	Pyramidal	FALSE	TRUE
974	11	5.75	190921_191002	p11_190921_191002_191002_a001	488	Pyramidal	FALSE	TRUE
975	11	5.75	190921_191002	p11_190921_191002_191002_a001	489	Pyramidal	FALSE	TRUE
976	11	5.75	190921_191002	p11_190921_191002_191002_a001	490	Pyramidal	FALSE	TRUE
977	11	5.75	190921_191002	p11_190921_191002_191002_a001	491	Pyramidal	FALSE	FALSE
978	11	5.75	190921_191002	p11_190921_191002_191002_a001	492	Pyramidal	FALSE	TRUE
979	11	5.75	190921_191002	p11_190921_191002_191002_a001	493	Pyramidal	FALSE	TRUE
980	11	5.75	190921_191002	p11_190921_191002_191002_a001	494	Pyramidal	FALSE	TRUE
981	11	5.75	190921_191002	p11_190921_191002_191002_a001	495	Pyramidal	FALSE	TRUE
982	11	5.75	190921_191002	p11_190921_191002_191002_a001	496	Pyramidal	FALSE	FALSE
983	11	5.75	190921_191002	p11_190921_191002_191002_a001	497	Pyramidal	TRUE	FALSE
984	11	5.75	190921_191002	p11_190921_191002_191002_a001	498	Pyramidal	FALSE	TRUE
985	11	5.75	190921_191002	p11_190921_191002_191002_a001	499	Pyramidal	FALSE	TRUE
986	11	5.75	190921_191002	p11_190921_191002_191002_a001	500	Pyramidal	FALSE	TRUE
987	11	5.75	190921_191002	p11_190921_191002_191002_a001	501	Pyramidal	TRUE	FALSE
988	11	5.75	190921_191002	p11_190921_191002_191002_a001	502	Pyramidal	FALSE	FALSE
989	11	5.75	190921_191002	p11_190921_191002_191002_a001	503	Pyramidal	FALSE	TRUE
990	11	5.75	190921_191002	p11_190921_191002_191002_a001	504	Pyramidal	FALSE	TRUE
991	11	5.75	190921_191002	p11_190921_191002_191002_a001	505	Pyramidal	FALSE	FALSE
992	11	5.75	190921_191002	p11_190921_191002_191002_a001	506	Pyramidal	FALSE	TRUE
993	11	5.75	190921_191002	p11_190921_191002_191002_a001	507	Pyramidal	FALSE	TRUE
994	11	5.75	190921_191002	p11_190921_191002_191002_a001	508	Pyramidal	FALSE	FALSE
995	11	5.75	190921_191002	p11_190921_191002_191002_a001	509	Pyramidal	FALSE	TRUE
996	11	5.75	190921_191002	p11_190921_191002_191002_a001	510	Pyramidal	FALSE	TRUE
997	11	5.75	190921_191002	p11_190921_191002_191002_a001	511	Pyramidal	FALSE	TRUE
998	11	5.75	190921_191002	p11_190921_191002_191002_a001	512	Pyramidal	FALSE	TRUE
999	11	5.75	190921_191002	p11_190921_191002_191002_a001	513	Pyramidal	FALSE	FALSE
1000	11	5.75	190921_191002	p11_190921_191002_191002_a001	514	Pyramidal	FALSE	FALSE
1001	11	5.75	190921_191002	p11_190921_191002_191002_a001	515	Pyramidal	FALSE	TRUE
1002	11	5.75	190921_191002	p11_190921_191002_191002_a001	516	Interneuron	FALSE	TRUE
1003	11	5.75	190921_191002	p11_190921_191002_191002_a001	517	Pyramidal	FALSE	TRUE
1004	11	5.75	190921_191002	p11_190921_191002_191002_a001	518	Pyramidal	FALSE	TRUE
1005	11	5.75	190921_191002	p11_190921_191002_191002_a001	519	Pyramidal	FALSE	TRUE
1006	11	5.75	190921_191002	p11_190921_191002_191002_a001	520	Pyramidal	FALSE	TRUE
1007	11	5.75	190921_191002	p11_190921_191002_191002_a001	521	Pyramidal	FALSE	TRUE
1008	11	5.75	190921_191002	p11_190921_191002_191002_a001	522	Pyramidal	FALSE	TRUE
1009	11	5.75	190921_191002	p11_190921_191002_191002_a001	523	Pyramidal	FALSE	TRUE
1010	11	5.75	190921_191002	p11_190921_191002_191002_a001	524	Pyramidal	FALSE	TRUE
1011	11	5.75	190921_191002	p11_190921_191002_191002_a001	525	Pyramidal	FALSE	TRUE
1012	11	5.75	190921_191002	p11_190921_191002_191002_a001	526	Pyramidal	FALSE	TRUE
1013	11	5.75	190921_191002	p11_190921_191002_191002_a001	527	Pyramidal	TRUE	FALSE
1014	11	5.75	190921_191002	p11_190921_191002_191002_a001	528	Pyramidal	FALSE	TRUE
1015	11	5.75	190921_191002	p11_190921_191002_191002_a001	529	Pyramidal	TRUE	TRUE
1016	11	5.75	190921_191002	p11_190921_191002_191002_a001	530	Pyramidal	FALSE	TRUE
1017	11	5.75	190921_191002	p11_190921_191002_191002_a001	531	Pyramidal	FALSE	TRUE
1018	11	5.75	190921_191002	p11_190921_191002_191002_a001	532	Pyramidal	FALSE	FALSE
1019	11	5.75	190921_191002	p11_190921_191002_191002_a001	533	Pyramidal	FALSE	TRUE
1020	11	5.75	190921_191002	p11_190921_191002_191002_a001	534	Pyramidal	FALSE	FALSE
1021	11	5.75	190921_191002	p11_190921_191002_191002_a001	535	Pyramidal	FALSE	TRUE
1022	11	5.75	190921_191002	p11_190921_191002_191002_a001	536	Pyramidal	FALSE	FALSE
1023	11	5.75	190921_191002	p11_190921_191002_191002_a001	537	Pyramidal	FALSE	TRUE
1024	11	5.75	190921_191002	p11_190921_191002_191002_a001	538	Pyramidal	TRUE	TRUE
1025	11	5.75	190921_191002	p11_190921_191002_191002_a001	539	Pyramidal	FALSE	FALSE
1026	11	5.75	190921_191002	p11_190921_191002_191002_a001	540	Pyramidal	FALSE	TRUE
1027	11	5.75	190921_191002	p11_190921_191002_191002_a001	541	Pyramidal	FALSE	FALSE
1028	11	5.75	190921_191002	p11_190921_191002_191002_a001	542	Pyramidal	FALSE	TRUE
1029	11	5.75	190921_191002	p11_190921_191002_191002_a001	543	Pyramidal	FALSE	TRUE
1030	11	5.75	190921_191002	p11_190921_191002_191002_a001	544	Pyramidal	FALSE	TRUE
1031	11	5.75	190921_191002	p11_190921_191002_191002_a001	545	Pyramidal	FALSE	TRUE
1032	11	5.75	190921_191002	p11_190921_191002_191002_a001	546	Pyramidal	FALSE	TRUE
1033	11	5.75	190921_191002	p11_190921_191002_191002_a001	547	Pyramidal	FALSE	TRUE
1034	11	5.75	190921_191002	p11_190921_191002_191002_a001	548	Pyramidal	FALSE	TRUE
1035	11	5.75	190921_191002	p11_190921_191002_191002_a001	549	Pyramidal	FALSE	TRUE
1036	11	5.75	190921_191002	p11_190921_191002_191002_a001	550	Pyramidal	FALSE	TRUE
1037	11	5.75	190921_191002	p11_190921_191002_191002_a001	551	Pyramidal	FALSE	TRUE
1038	11	5.75	190921_191002	p11_190921_191002_191002_a001	552	Pyramidal	FALSE	TRUE
1039	11	5.75	190921_191002	p11_190921_191002_191002_a001	553	Pyramidal	TRUE	TRUE
1040	11	5.75	190921_191002	p11_190921_191002_191002_a001	554	Pyramidal	FALSE	TRUE
1041	11	5.75	190921_191002	p11_190921_191002_191002_a001	555	Pyramidal	FALSE	FALSE
1042	11	5.75	190921_191002	p11_190921_191002_191002_a001	556	Pyramidal	FALSE	TRUE
1043	11	5.75	190921_191002	p11_190921_191002_191002_a001	557	Pyramidal	FALSE	TRUE
1044	11	5.75	190921_191002	p11_190921_191002_191002_a001	558	Pyramidal	FALSE	TRUE
1045	11	5.75	190921_191002	p11_190921_191002_191002_a001	559	Pyramidal	TRUE	TRUE
1046	11	5.75	190921_191002	p11_190921_191002_191002_a001	560	Pyramidal	FALSE	TRUE
1047	11	5.75	190921_191002	p11_190921_191002_191002_a001	561	Pyramidal	FALSE	TRUE
1048	11	5.75	190921_191002	p11_190921_191002_191002_a001	562	Pyramidal	FALSE	TRUE
1049	11	5.75	190921_191002	p11_190921_191002_191002_a001	563	Pyramidal	FALSE	TRUE
1050	11	5.75	190921_191002	p11_190921_191002_191002_a001	564	Pyramidal	FALSE	TRUE
1051	11	5.75	190921_191002	p11_190921_191002_191002_a001	565	Pyramidal	TRUE	TRUE
1052	11	5.75	190921_191002	p11_190921_191002_191002_a001	566	Pyramidal	FALSE	TRUE
1053	12	7	171029_171110	p12_171029_171110_171110_a000	0	Interneuron	FALSE	FALSE
1054	12	7	171029_171110	p12_171029_171110_171110_a000	1	Interneuron	FALSE	FALSE
1055	12	7	171029_171110	p12_171029_171110_171110_a000	2	Pyramidal	FALSE	FALSE
1056	12	7	171029_171110	p12_171029_171110_171110_a000	3	Interneuron	FALSE	FALSE
1057	12	7	171029_171110	p12_171029_171110_171110_a000	4	Interneuron	FALSE	FALSE
1058	12	7	171029_171110	p12_171029_171110_171110_a000	5	Pyramidal	FALSE	FALSE
1059	12	7	171029_171110	p12_171029_171110_171110_a000	6	Interneuron	TRUE	FALSE
1060	12	7	171029_171110	p12_171029_171110_171110_a000	7	Interneuron	FALSE	FALSE
1061	12	7	171029_171110	p12_171029_171110_171110_a000	8	Pyramidal	FALSE	FALSE
1062	12	7	171029_171110	p12_171029_171110_171110_a000	9	Pyramidal	FALSE	TRUE
1063	12	7	171029_171110	p12_171029_171110_171110_a000	10	Pyramidal	FALSE	FALSE
1064	12	7	171029_171110	p12_171029_171110_171110_a000	11	Pyramidal	FALSE	FALSE
1065	12	7	171029_171110	p12_171029_171110_171110_a000	12	Pyramidal	TRUE	FALSE
1066	12	7	171029_171110	p12_171029_171110_171110_a000	13	Pyramidal	TRUE	FALSE
1067	12	7	171029_171110	p12_171029_171110_171110_a000	14	Interneuron	FALSE	FALSE
1068	12	7	171029_171110	p12_171029_171110_171110_a000	15	Pyramidal	FALSE	FALSE
1069	12	7	171029_171110	p12_171029_171110_171110_a000	16	Interneuron	FALSE	FALSE
1070	12	7	171029_171110	p12_171029_171110_171110_a000	17	Pyramidal	FALSE	TRUE
1071	12	7	171029_171110	p12_171029_171110_171110_a000	18	Pyramidal	FALSE	FALSE
1072	12	7	171029_171110	p12_171029_171110_171110_a000	19	Pyramidal	TRUE	FALSE
1073	12	7	171029_171110	p12_171029_171110_171110_a000	20	Pyramidal	FALSE	FALSE
1074	12	7	171029_171110	p12_171029_171110_171110_a000	21	Pyramidal	TRUE	TRUE
1075	12	7	171029_171110	p12_171029_171110_171110_a000	22	Pyramidal	FALSE	FALSE
1076	12	7	171029_171110	p12_171029_171110_171110_a000	23	Pyramidal	FALSE	FALSE
1077	12	7	171029_171110	p12_171029_171110_171110_a000	24	Pyramidal	FALSE	FALSE
1078	12	7	171029_171110	p12_171029_171110_171110_a000	25	Pyramidal	FALSE	FALSE
1079	12	7	171029_171110	p12_171029_171110_171110_a000	26	Interneuron	FALSE	FALSE
1080	12	7	171029_171110	p12_171029_171110_171110_a000	27	Interneuron	TRUE	FALSE
1081	12	7	171029_171110	p12_171029_171110_171110_a000	28	Pyramidal	FALSE	FALSE
1082	12	7	171029_171110	p12_171029_171110_171110_a000	29	Pyramidal	FALSE	FALSE
1083	12	7	171029_171110	p12_171029_171110_171110_a000	30	Interneuron	FALSE	TRUE
1084	12	7	171029_171110	p12_171029_171110_171110_a000	31	Pyramidal	FALSE	TRUE
1085	12	7	171029_171110	p12_171029_171110_171110_a000	32	Pyramidal	FALSE	FALSE
1086	12	7	171029_171110	p12_171029_171110_171110_a000	33	Pyramidal	FALSE	FALSE
1087	12	7	171029_171110	p12_171029_171110_171110_a000	34	Pyramidal	TRUE	TRUE
1088	12	7	171029_171110	p12_171029_171110_171110_a000	35	Interneuron	FALSE	FALSE
1089	12	7	171029_171110	p12_171029_171110_171110_a000	36	Pyramidal	FALSE	FALSE
1090	12	7	171029_171110	p12_171029_171110_171110_a000	37	Pyramidal	FALSE	TRUE
1091	12	7	171029_171110	p12_171029_171110_171110_a000	38	Pyramidal	FALSE	FALSE
1092	12	7	171029_171110	p12_171029_171110_171110_a000	39	Pyramidal	FALSE	FALSE
1093	12	7	171029_171110	p12_171029_171110_171110_a000	40	Pyramidal	FALSE	FALSE
1094	12	7	171029_171110	p12_171029_171110_171110_a000	41	Pyramidal	FALSE	TRUE
1095	12	7	171029_171110	p12_171029_171110_171110_a000	42	Pyramidal	FALSE	FALSE
1096	12	7	171029_171110	p12_171029_171110_171110_a000	43	Pyramidal	FALSE	TRUE
1097	12	7	171029_171110	p12_171029_171110_171110_a000	44	Pyramidal	TRUE	FALSE
1098	12	7	171029_171110	p12_171029_171110_171110_a000	45	Pyramidal	FALSE	FALSE
1099	12	7	171029_171110	p12_171029_171110_171110_a000	46	Pyramidal	FALSE	FALSE
1100	12	7	171029_171110	p12_171029_171110_171110_a000	47	Pyramidal	FALSE	TRUE
1101	12	7	171029_171110	p12_171029_171110_171110_a000	48	Pyramidal	FALSE	FALSE
1102	12	7	171029_171110	p12_171029_171110_171110_a000	49	Pyramidal	FALSE	TRUE
1103	12	7	171029_171110	p12_171029_171110_171110_a000	50	Pyramidal	FALSE	FALSE
1104	12	7	171029_171110	p12_171029_171110_171110_a000	51	Pyramidal	FALSE	FALSE
1105	12	7	171029_171110	p12_171029_171110_171110_a000	52	Pyramidal	FALSE	TRUE
1106	12	7	171029_171110	p12_171029_171110_171110_a000	53	Interneuron	FALSE	FALSE
1107	12	7	171029_171110	p12_171029_171110_171110_a000	54	Pyramidal	FALSE	TRUE
1108	12	7	171029_171110	p12_171029_171110_171110_a000	55	Pyramidal	FALSE	FALSE
1109	12	7	171029_171110	p12_171029_171110_171110_a000	56	Pyramidal	FALSE	TRUE
1110	12	7	171029_171110	p12_171029_171110_171110_a000	57	Pyramidal	FALSE	TRUE
1111	12	7	171029_171110	p12_171029_171110_171110_a000	58	Pyramidal	FALSE	TRUE
1112	12	7	171029_171110	p12_171029_171110_171110_a000	59	Pyramidal	FALSE	FALSE
1113	12	7	171029_171110	p12_171029_171110_171110_a000	60	Pyramidal	FALSE	FALSE
1114	12	7	171029_171110	p12_171029_171110_171110_a000	61	Pyramidal	FALSE	FALSE
1115	12	7	171029_171110	p12_171029_171110_171110_a000	62	Pyramidal	FALSE	FALSE
1116	12	7	171029_171110	p12_171029_171110_171110_a000	63	Pyramidal	FALSE	FALSE
1117	12	7	171029_171110	p12_171029_171110_171110_a000	64	Pyramidal	FALSE	FALSE
1118	12	7	171029_171110	p12_171029_171110_171110_a000	65	Pyramidal	FALSE	FALSE
1119	12	7	171029_171110	p12_171029_171110_171110_a000	66	Interneuron	FALSE	FALSE
1120	12	7	171029_171110	p12_171029_171110_171110_a000	67	Pyramidal	FALSE	FALSE
1121	12	7	171029_171110	p12_171029_171110_171110_a000	68	Pyramidal	FALSE	FALSE
1122	12	7	171029_171110	p12_171029_171110_171110_a000	69	Pyramidal	FALSE	TRUE
1123	12	7	171029_171110	p12_171029_171110_171110_a000	70	Pyramidal	FALSE	TRUE
1124	12	7	171029_171110	p12_171029_171110_171110_a000	71	Pyramidal	FALSE	TRUE
1125	12	7	171029_171110	p12_171029_171110_171110_a000	72	Pyramidal	FALSE	TRUE
1126	12	7	171029_171110	p12_171029_171110_171110_a000	73	Pyramidal	FALSE	FALSE
1127	12	7	171029_171110	p12_171029_171110_171110_a000	74	Pyramidal	FALSE	TRUE
1128	12	7	171029_171110	p12_171029_171110_171110_a000	75	Pyramidal	FALSE	FALSE
1129	12	7	171029_171110	p12_171029_171110_171110_a000	76	Pyramidal	FALSE	TRUE
1130	12	7	171029_171110	p12_171029_171110_171110_a000	77	Pyramidal	FALSE	FALSE
1131	12	7	171029_171110	p12_171029_171110_171110_a000	78	Pyramidal	FALSE	FALSE
1132	12	7	171029_171110	p12_171029_171110_171110_a000	79	Pyramidal	FALSE	FALSE
1133	12	7	171029_171110	p12_171029_171110_171110_a000	80	Pyramidal	FALSE	FALSE
1134	12	7	171029_171110	p12_171029_171110_171110_a000	81	Pyramidal	FALSE	TRUE
1135	12	7	171029_171110	p12_171029_171110_171110_a000	82	Pyramidal	FALSE	FALSE
1136	12	7	171029_171110	p12_171029_171110_171110_a000	83	Pyramidal	TRUE	TRUE
1137	12	7	171029_171110	p12_171029_171110_171110_a000	84	Interneuron	FALSE	FALSE
1138	12	7	171029_171110	p12_171029_171110_171110_a000	85	Pyramidal	FALSE	FALSE
1139	12	7	171029_171110	p12_171029_171110_171110_a000	86	Pyramidal	FALSE	FALSE
1140	12	7	171029_171110	p12_171029_171110_171110_a000	87	Pyramidal	FALSE	FALSE
1141	12	7	171029_171110	p12_171029_171110_171110_a000	88	Pyramidal	FALSE	FALSE
1142	12	7	171029_171110	p12_171029_171110_171110_a000	89	Pyramidal	FALSE	FALSE
1143	12	7	171029_171110	p12_171029_171110_171110_a000	90	Pyramidal	FALSE	TRUE
1144	12	7	171029_171110	p12_171029_171110_171110_a000	91	Pyramidal	FALSE	TRUE
1145	12	7	171029_171110	p12_171029_171110_171110_a000	92	Pyramidal	FALSE	TRUE
1146	12	7	171029_171110	p12_171029_171110_171110_a000	93	Pyramidal	FALSE	FALSE
1147	12	7	171029_171110	p12_171029_171110_171110_a000	94	Pyramidal	TRUE	TRUE
1148	12	7	171029_171110	p12_171029_171110_171110_a000	95	Pyramidal	FALSE	TRUE
1149	12	7	171029_171110	p12_171029_171110_171110_a000	96	Pyramidal	FALSE	TRUE
1150	12	7	171029_171110	p12_171029_171110_171110_a000	97	Pyramidal	TRUE	TRUE
1151	12	7	171029_171110	p12_171029_171110_171110_a000	98	Pyramidal	FALSE	FALSE
1152	12	7	171029_171110	p12_171029_171110_171110_a000	99	Pyramidal	FALSE	TRUE
1153	12	7	171029_171110	p12_171029_171110_171110_a000	100	Pyramidal	FALSE	FALSE
1154	12	7	171029_171110	p12_171029_171110_171110_a000	101	Pyramidal	FALSE	FALSE
1155	12	7	171029_171110	p12_171029_171110_171110_a000	102	Pyramidal	FALSE	FALSE
1156	12	7	171029_171110	p12_171029_171110_171110_a000	103	Interneuron	FALSE	FALSE
1157	12	7	171029_171110	p12_171029_171110_171110_a000	104	Pyramidal	FALSE	TRUE
1158	12	7	171029_171110	p12_171029_171110_171110_a000	105	Pyramidal	FALSE	FALSE
1159	12	7	171029_171110	p12_171029_171110_171110_a000	106	Pyramidal	FALSE	FALSE
1160	12	7	171029_171110	p12_171029_171110_171110_a000	107	Pyramidal	FALSE	TRUE
1161	12	7	171029_171110	p12_171029_171110_171110_a000	108	Pyramidal	TRUE	TRUE
1162	12	7	171029_171110	p12_171029_171110_171110_a000	109	Pyramidal	FALSE	TRUE
1163	12	7	171029_171110	p12_171029_171110_171110_a000	110	Pyramidal	TRUE	FALSE
1164	12	7	171029_171110	p12_171029_171110_171110_a000	111	Pyramidal	FALSE	TRUE
1165	12	7	171029_171110	p12_171029_171110_171110_a000	112	Interneuron	FALSE	FALSE
1166	12	7	171029_171110	p12_171029_171110_171110_a000	113	Pyramidal	FALSE	FALSE
1167	12	7	171029_171110	p12_171029_171110_171110_a000	114	Pyramidal	FALSE	TRUE
1168	12	7	171029_171110	p12_171029_171110_171110_a000	115	Pyramidal	FALSE	FALSE
1169	12	7	171029_171110	p12_171029_171110_171110_a000	116	Pyramidal	FALSE	FALSE
1170	12	7	171029_171110	p12_171029_171110_171110_a000	117	Pyramidal	FALSE	FALSE
1171	12	7	171029_171110	p12_171029_171110_171110_a000	118	Pyramidal	FALSE	FALSE
1172	12	7	171029_171110	p12_171029_171110_171110_a000	119	Pyramidal	FALSE	FALSE
1173	12	7	171029_171110	p12_171029_171110_171110_a000	120	Pyramidal	FALSE	TRUE
1174	12	7	171029_171110	p12_171029_171110_171110_a000	121	Pyramidal	FALSE	FALSE
1175	12	7	171029_171110	p12_171029_171110_171110_a000	122	Pyramidal	FALSE	TRUE
1176	12	7	171029_171110	p12_171029_171110_171110_a000	123	Pyramidal	FALSE	TRUE
1177	12	7	171029_171110	p12_171029_171110_171110_a000	124	Pyramidal	FALSE	FALSE
1178	12	7	171029_171110	p12_171029_171110_171110_a000	125	Pyramidal	TRUE	TRUE
1179	12	7	171029_171110	p12_171029_171110_171110_a000	126	Pyramidal	FALSE	FALSE
1180	12	7	171029_171110	p12_171029_171110_171110_a000	127	Pyramidal	TRUE	TRUE
1181	12	7	171029_171110	p12_171029_171110_171110_a000	128	Pyramidal	FALSE	FALSE
1182	12	7	171029_171110	p12_171029_171110_171110_a000	129	Pyramidal	FALSE	FALSE
1183	12	7	171029_171110	p12_171029_171110_171110_a000	130	Pyramidal	FALSE	TRUE
1184	12	7	171029_171110	p12_171029_171110_171110_a000	131	Pyramidal	FALSE	FALSE
1185	12	7	171029_171110	p12_171029_171110_171110_a000	132	Pyramidal	FALSE	FALSE
1186	12	7	171029_171110	p12_171029_171110_171110_a000	133	Pyramidal	FALSE	TRUE
1187	12	7	171029_171110	p12_171029_171110_171110_a000	134	Pyramidal	FALSE	TRUE
1188	12	7	171029_171110	p12_171029_171110_171110_a000	135	Pyramidal	FALSE	FALSE
1189	12	7	171029_171110	p12_171029_171110_171110_a000	136	Pyramidal	FALSE	TRUE
1190	12	7	171029_171110	p12_171029_171110_171110_a000	137	Pyramidal	FALSE	FALSE
1191	12	7	171029_171110	p12_171029_171110_171110_a000	138	Pyramidal	TRUE	TRUE
1192	12	7	171029_171110	p12_171029_171110_171110_a000	139	Pyramidal	FALSE	TRUE
1193	12	7	171029_171110	p12_171029_171110_171110_a000	140	Pyramidal	FALSE	FALSE
1194	12	7	171029_171110	p12_171029_171110_171110_a000	141	Pyramidal	FALSE	TRUE
1195	12	7	171029_171110	p12_171029_171110_171110_a000	142	Pyramidal	FALSE	TRUE
1196	12	7	171029_171110	p12_171029_171110_171110_a000	143	Pyramidal	FALSE	FALSE
1197	12	7	171029_171110	p12_171029_171110_171110_a000	144	Pyramidal	FALSE	FALSE
1198	12	7	171029_171110	p12_171029_171110_171110_a000	145	Pyramidal	FALSE	TRUE
1199	12	7	171029_171110	p12_171029_171110_171110_a000	146	Pyramidal	FALSE	FALSE
1200	12	7	171029_171110	p12_171029_171110_171110_a000	147	Pyramidal	FALSE	FALSE
1201	12	7	171029_171110	p12_171029_171110_171110_a000	148	Pyramidal	FALSE	FALSE
1202	12	7	171029_171110	p12_171029_171110_171110_a000	149	Pyramidal	FALSE	FALSE
1203	12	7	171029_171110	p12_171029_171110_171110_a000	150	Pyramidal	FALSE	TRUE
1204	12	7	171029_171110	p12_171029_171110_171110_a000	151	Pyramidal	FALSE	FALSE
1205	12	7	171029_171110	p12_171029_171110_171110_a000	152	Pyramidal	FALSE	TRUE
1206	12	7	171029_171110	p12_171029_171110_171110_a000	153	Pyramidal	FALSE	FALSE
1207	12	7	171029_171110	p12_171029_171110_171110_a000	154	Pyramidal	FALSE	FALSE
1208	12	7	171029_171110	p12_171029_171110_171110_a000	155	Pyramidal	FALSE	TRUE
1209	12	7	171029_171110	p12_171029_171110_171110_a000	156	Pyramidal	FALSE	TRUE
1210	12	7	171029_171110	p12_171029_171110_171110_a000	157	Pyramidal	FALSE	FALSE
1211	12	7	171029_171110	p12_171029_171110_171110_a000	158	Pyramidal	FALSE	FALSE
1212	12	7	171029_171110	p12_171029_171110_171110_a000	159	Pyramidal	TRUE	FALSE
1213	12	7	171029_171110	p12_171029_171110_171110_a000	160	Pyramidal	FALSE	TRUE
1214	12	7	171029_171110	p12_171029_171110_171110_a000	161	Pyramidal	TRUE	FALSE
1215	12	7	171029_171110	p12_171029_171110_171110_a000	162	Pyramidal	FALSE	FALSE
1216	12	7	171029_171110	p12_171029_171110_171110_a000	163	Pyramidal	FALSE	TRUE
1217	12	7	171029_171110	p12_171029_171110_171110_a000	164	Pyramidal	FALSE	FALSE
1218	12	7	171029_171110	p12_171029_171110_171110_a000	165	Pyramidal	FALSE	FALSE
1219	12	7	171029_171110	p12_171029_171110_171110_a000	166	Pyramidal	TRUE	TRUE
1220	12	7	171029_171110	p12_171029_171110_171110_a000	167	Pyramidal	FALSE	FALSE
1221	12	7	171029_171110	p12_171029_171110_171110_a000	168	Pyramidal	FALSE	TRUE
1222	12	7	171029_171110	p12_171029_171110_171110_a000	169	Pyramidal	FALSE	FALSE
1223	12	7	171029_171110	p12_171029_171110_171110_a000	170	Pyramidal	FALSE	FALSE
1224	12	7	171029_171110	p12_171029_171110_171110_a000	171	Pyramidal	FALSE	TRUE
1225	12	7	171029_171110	p12_171029_171110_171110_a000	172	Pyramidal	FALSE	TRUE
1226	12	7	171029_171110	p12_171029_171110_171110_a000	173	Pyramidal	FALSE	FALSE
1227	12	7	171029_171110	p12_171029_171110_171110_a000	174	Pyramidal	FALSE	FALSE
1228	12	7	171029_171110	p12_171029_171110_171110_a000	175	Pyramidal	FALSE	FALSE
1229	12	7	171029_171110	p12_171029_171110_171110_a000	176	Pyramidal	FALSE	FALSE
1230	12	7	171029_171110	p12_171029_171110_171110_a000	177	Pyramidal	FALSE	FALSE
1231	12	7	171029_171110	p12_171029_171110_171110_a000	178	Pyramidal	FALSE	FALSE
1232	12	7	171029_171110	p12_171029_171110_171110_a000	179	Pyramidal	FALSE	TRUE
1233	12	7	171029_171110	p12_171029_171110_171110_a000	180	Pyramidal	FALSE	TRUE
1234	12	7	171029_171110	p12_171029_171110_171110_a000	181	Pyramidal	FALSE	FALSE
1235	12	7	171029_171110	p12_171029_171110_171110_a000	182	Pyramidal	FALSE	TRUE
1236	12	7	171029_171110	p12_171029_171110_171110_a000	183	Pyramidal	FALSE	FALSE
1237	12	7	171029_171110	p12_171029_171110_171110_a000	184	Pyramidal	FALSE	FALSE
1238	12	7	171029_171110	p12_171029_171110_171110_a000	185	Pyramidal	FALSE	FALSE
1239	12	7	171029_171110	p12_171029_171110_171110_a000	186	Pyramidal	FALSE	TRUE
1240	12	7	171029_171110	p12_171029_171110_171110_a000	187	Pyramidal	FALSE	FALSE
1241	12	7	171029_171110	p12_171029_171110_171110_a000	188	Pyramidal	FALSE	FALSE
1242	12	7	171029_171110	p12_171029_171110_171110_a000	189	Pyramidal	FALSE	FALSE
1243	12	7	171029_171110	p12_171029_171110_171110_a000	190	Pyramidal	FALSE	FALSE
1244	12	7	171029_171110	p12_171029_171110_171110_a000	191	Pyramidal	FALSE	TRUE
1245	12	7	171029_171110	p12_171029_171110_171110_a000	192	Pyramidal	FALSE	TRUE
1246	12	7	171029_171110	p12_171029_171110_171110_a000	193	Pyramidal	FALSE	FALSE
1247	12	7	171029_171110	p12_171029_171110_171110_a000	194	Pyramidal	FALSE	FALSE
1248	12	7	171029_171110	p12_171029_171110_171110_a000	195	Pyramidal	FALSE	FALSE
1249	12	7	171029_171110	p12_171029_171110_171110_a000	196	Pyramidal	FALSE	TRUE
1250	12	7	171029_171110	p12_171029_171110_171110_a000	197	Pyramidal	FALSE	FALSE
1251	12	7	171029_171110	p12_171029_171110_171110_a000	198	Pyramidal	FALSE	FALSE
1252	12	7	171029_171110	p12_171029_171110_171110_a000	199	Pyramidal	FALSE	TRUE
1253	12	7	171029_171110	p12_171029_171110_171110_a000	200	Pyramidal	FALSE	TRUE
1254	12	7	171029_171110	p12_171029_171110_171110_a000	201	Pyramidal	FALSE	FALSE
1255	12	7	171029_171110	p12_171029_171110_171110_a000	202	Pyramidal	FALSE	FALSE
1256	12	7	171029_171110	p12_171029_171110_171110_a000	203	Pyramidal	FALSE	TRUE
1257	12	7	171029_171110	p12_171029_171110_171110_a000	204	Pyramidal	FALSE	TRUE
1258	12	7	171029_171110	p12_171029_171110_171110_a000	205	Pyramidal	FALSE	FALSE
1259	12	7	171029_171110	p12_171029_171110_171110_a000	206	Pyramidal	FALSE	FALSE
1260	12	7	171029_171110	p12_171029_171110_171110_a000	207	Pyramidal	FALSE	TRUE
1261	12	7	171029_171110	p12_171029_171110_171110_a000	208	Pyramidal	FALSE	FALSE
1262	12	7	171029_171110	p12_171029_171110_171110_a000	209	Pyramidal	FALSE	FALSE
1263	12	7	171029_171110	p12_171029_171110_171110_a000	210	Pyramidal	FALSE	FALSE
1264	12	7	171029_171110	p12_171029_171110_171110_a000	211	Pyramidal	FALSE	FALSE
1265	12	7	171029_171110	p12_171029_171110_171110_a000	212	Pyramidal	FALSE	TRUE
1266	12	7	171029_171110	p12_171029_171110_171110_a000	213	Pyramidal	FALSE	TRUE
1267	12	7	171029_171110	p12_171029_171110_171110_a000	214	Pyramidal	FALSE	FALSE
1268	12	7	171029_171110	p12_171029_171110_171110_a000	215	Pyramidal	FALSE	FALSE
1269	12	7	171029_171110	p12_171029_171110_171110_a000	216	Pyramidal	FALSE	FALSE
1270	12	7	171029_171110	p12_171029_171110_171110_a000	217	Pyramidal	FALSE	FALSE
1271	12	7	171029_171110	p12_171029_171110_171110_a000	218	Pyramidal	FALSE	TRUE
1272	12	7	171029_171110	p12_171029_171110_171110_a000	219	Pyramidal	FALSE	TRUE
1273	12	7	171029_171110	p12_171029_171110_171110_a000	220	Pyramidal	FALSE	FALSE
1274	12	7	171029_171110	p12_171029_171110_171110_a000	221	Interneuron	FALSE	FALSE
1275	12	7	171029_171110	p12_171029_171110_171110_a000	222	Pyramidal	FALSE	FALSE
1276	12	7	171029_171110	p12_171029_171110_171110_a000	223	Pyramidal	FALSE	TRUE
1277	12	7	171029_171110	p12_171029_171110_171110_a000	224	Pyramidal	FALSE	FALSE
1278	12	7	171029_171110	p12_171029_171110_171110_a000	225	Pyramidal	FALSE	TRUE
1279	12	7	171029_171110	p12_171029_171110_171110_a000	226	Pyramidal	FALSE	TRUE
1280	12	7	171029_171110	p12_171029_171110_171110_a000	227	Interneuron	FALSE	FALSE
1281	12	7	171029_171110	p12_171029_171110_171110_a000	228	Pyramidal	FALSE	FALSE
1282	12	7	171029_171110	p12_171029_171110_171110_a000	229	Pyramidal	FALSE	TRUE
1283	12	7	171029_171110	p12_171029_171110_171110_a000	230	Pyramidal	FALSE	TRUE
1284	12	7	171029_171110	p12_171029_171110_171110_a000	231	Pyramidal	FALSE	FALSE
1285	12	7	171029_171110	p12_171029_171110_171110_a000	232	Pyramidal	FALSE	TRUE
1286	12	7	171029_171110	p12_171029_171110_171110_a000	233	Pyramidal	FALSE	TRUE
1287	12	7	171029_171110	p12_171029_171110_171110_a000	234	Pyramidal	FALSE	FALSE
1288	12	7	171029_171110	p12_171029_171110_171110_a000	235	Pyramidal	FALSE	TRUE
1289	12	7	171029_171110	p12_171029_171110_171110_a000	236	Pyramidal	FALSE	TRUE
1290	12	7	171029_171110	p12_171029_171110_171110_a000	237	Pyramidal	FALSE	FALSE
1291	12	7	171029_171110	p12_171029_171110_171110_a000	238	Pyramidal	TRUE	TRUE
1292	12	7	171029_171110	p12_171029_171110_171110_a000	239	Pyramidal	TRUE	FALSE
1293	12	7	171029_171110	p12_171029_171110_171110_a000	240	Pyramidal	FALSE	FALSE
1294	12	7	171029_171110	p12_171029_171110_171110_a000	241	Pyramidal	FALSE	FALSE
1295	12	7	171029_171110	p12_171029_171110_171110_a000	242	Interneuron	FALSE	TRUE
1296	12	7	171029_171110	p12_171029_171110_171110_a000	243	Pyramidal	FALSE	FALSE
1297	12	7	171029_171110	p12_171029_171110_171110_a000	244	Pyramidal	FALSE	TRUE
1298	12	7	171029_171110	p12_171029_171110_171110_a000	245	Pyramidal	FALSE	TRUE
1299	12	7	171029_171110	p12_171029_171110_171110_a000	246	Pyramidal	FALSE	FALSE
1300	12	7	171029_171110	p12_171029_171110_171110_a000	247	Pyramidal	TRUE	TRUE
1301	12	7	171029_171110	p12_171029_171110_171110_a000	248	Pyramidal	TRUE	TRUE
1302	12	7	171029_171110	p12_171029_171110_171110_a000	249	Pyramidal	FALSE	FALSE
1303	12	7	171029_171110	p12_171029_171110_171110_a000	250	Pyramidal	FALSE	FALSE
1304	12	7	171029_171110	p12_171029_171110_171110_a000	251	Pyramidal	TRUE	TRUE
1305	12	7	171029_171110	p12_171029_171110_171110_a000	252	Pyramidal	TRUE	TRUE
1306	12	7	171029_171110	p12_171029_171110_171110_a000	253	Pyramidal	FALSE	TRUE
1307	12	7	171029_171110	p12_171029_171110_171110_a000	254	Pyramidal	FALSE	TRUE
1308	12	7	171029_171110	p12_171029_171110_171110_a000	255	Pyramidal	FALSE	FALSE
1309	12	7	171029_171110	p12_171029_171110_171110_a000	256	Pyramidal	FALSE	FALSE
1310	12	7	171029_171110	p12_171029_171110_171110_a000	257	Pyramidal	FALSE	FALSE
1311	12	7	171029_171110	p12_171029_171110_171110_a000	258	Pyramidal	FALSE	TRUE
1312	12	7	171029_171110	p12_171029_171110_171110_a000	259	Pyramidal	FALSE	TRUE
1313	12	7	171029_171110	p12_171029_171110_171110_a000	260	Pyramidal	FALSE	FALSE
1314	12	7	171029_171110	p12_171029_171110_171110_a000	261	Pyramidal	FALSE	TRUE
1315	12	7	171029_171110	p12_171029_171110_171110_a000	262	Pyramidal	FALSE	FALSE
1316	12	7	171029_171110	p12_171029_171110_171110_a000	263	Pyramidal	TRUE	FALSE
1317	12	7	171029_171110	p12_171029_171110_171110_a000	264	Pyramidal	FALSE	TRUE
1318	12	7	171029_171110	p12_171029_171110_171110_a000	265	Pyramidal	FALSE	TRUE
1319	12	7	171029_171110	p12_171029_171110_171110_a000	266	Pyramidal	FALSE	FALSE
1320	12	7	171029_171110	p12_171029_171110_171110_a000	267	Pyramidal	FALSE	FALSE
1321	12	7	171029_171110	p12_171029_171110_171110_a000	268	Pyramidal	FALSE	FALSE
1322	12	7	171029_171110	p12_171029_171110_171110_a000	269	Pyramidal	FALSE	TRUE
1323	12	7	171029_171110	p12_171029_171110_171110_a000	270	Pyramidal	FALSE	FALSE
1324	12	7	171029_171110	p12_171029_171110_171110_a000	271	Pyramidal	FALSE	TRUE
1325	12	7	171029_171110	p12_171029_171110_171110_a000	272	Pyramidal	FALSE	TRUE
1326	12	7	171029_171110	p12_171029_171110_171110_a000	273	Pyramidal	TRUE	FALSE
1327	12	7	171029_171110	p12_171029_171110_171110_a000	274	Pyramidal	FALSE	TRUE
1328	12	7	171029_171110	p12_171029_171110_171110_a000	275	Pyramidal	FALSE	TRUE
1329	12	7	171029_171110	p12_171029_171110_171110_a000	276	Pyramidal	TRUE	FALSE
1330	12	7	171029_171110	p12_171029_171110_171110_a000	277	Pyramidal	FALSE	FALSE
1331	12	7	171029_171110	p12_171029_171110_171110_a000	278	Pyramidal	FALSE	FALSE
1332	12	7	171029_171110	p12_171029_171110_171110_a000	279	Pyramidal	FALSE	TRUE
1333	12	7	171029_171110	p12_171029_171110_171110_a000	280	Pyramidal	FALSE	FALSE
1334	12	7	171029_171110	p12_171029_171110_171110_a000	281	Pyramidal	TRUE	TRUE
1335	12	7	171029_171110	p12_171029_171110_171110_a000	282	Pyramidal	TRUE	TRUE
1336	12	7	171029_171110	p12_171029_171110_171110_a000	283	Pyramidal	FALSE	FALSE
1337	12	7	171029_171110	p12_171029_171110_171110_a000	284	Pyramidal	FALSE	TRUE
1338	12	7	171029_171110	p12_171029_171110_171110_a000	285	Pyramidal	FALSE	FALSE
1339	12	7	171029_171110	p12_171029_171110_171110_a000	286	Pyramidal	TRUE	FALSE
1340	12	7	171029_171110	p12_171029_171110_171110_a000	287	Pyramidal	FALSE	FALSE
1341	12	7	171029_171110	p12_171029_171110_171110_a000	288	Pyramidal	FALSE	FALSE
1342	12	7	171029_171110	p12_171029_171110_171110_a000	289	Pyramidal	FALSE	FALSE
1343	12	7	171029_171110	p12_171029_171110_171110_a000	290	Pyramidal	FALSE	FALSE
1344	12	7	171029_171110	p12_171029_171110_171110_a000	291	Pyramidal	FALSE	FALSE
1345	12	7	171029_171110	p12_171029_171110_171110_a000	292	Pyramidal	TRUE	TRUE
1346	12	7	171029_171110	p12_171029_171110_171110_a000	293	Pyramidal	FALSE	TRUE
1347	12	7	171029_171110	p12_171029_171110_171110_a000	294	Pyramidal	FALSE	FALSE
1348	12	7	171029_171110	p12_171029_171110_171110_a000	295	Pyramidal	TRUE	TRUE
1349	12	7	171029_171110	p12_171029_171110_171110_a000	296	Pyramidal	FALSE	TRUE
1350	12	7	171029_171110	p12_171029_171110_171110_a000	297	Pyramidal	FALSE	FALSE
1351	12	7	171029_171110	p12_171029_171110_171110_a000	298	Pyramidal	FALSE	TRUE
1352	12	7	171029_171110	p12_171029_171110_171110_a000	299	Pyramidal	FALSE	TRUE
1353	12	7	171029_171110	p12_171029_171110_171110_a000	300	Pyramidal	FALSE	TRUE
1354	12	7	171029_171110	p12_171029_171110_171110_a000	301	Pyramidal	TRUE	FALSE
1355	12	7	171029_171110	p12_171029_171110_171110_a000	302	Pyramidal	FALSE	FALSE
1356	12	7	171029_171110	p12_171029_171110_171110_a000	303	Pyramidal	FALSE	FALSE
1357	12	7	171029_171110	p12_171029_171110_171110_a000	304	Pyramidal	TRUE	FALSE
1358	12	7	171029_171110	p12_171029_171110_171110_a000	305	Pyramidal	FALSE	FALSE
1359	12	7	171029_171110	p12_171029_171110_171110_a000	306	Pyramidal	FALSE	FALSE
1360	12	7	171029_171110	p12_171029_171110_171110_a000	307	Pyramidal	FALSE	TRUE
1361	12	7	171029_171110	p12_171029_171110_171110_a000	308	Pyramidal	FALSE	FALSE
1362	12	7	171029_171110	p12_171029_171110_171110_a000	309	Pyramidal	FALSE	FALSE
1363	12	7	171029_171110	p12_171029_171110_171110_a000	310	Pyramidal	FALSE	FALSE
1364	12	7	171029_171110	p12_171029_171110_171110_a000	311	Pyramidal	FALSE	FALSE
1365	12	7	171029_171110	p12_171029_171110_171110_a000	312	Pyramidal	FALSE	FALSE
1366	12	7	171029_171110	p12_171029_171110_171110_a000	313	Pyramidal	FALSE	FALSE
1367	12	7	171029_171110	p12_171029_171110_171110_a000	314	Pyramidal	FALSE	FALSE
1368	12	7	171029_171110	p12_171029_171110_171110_a000	315	Interneuron	FALSE	FALSE
1369	12	7	171029_171110	p12_171029_171110_171110_a000	316	Pyramidal	FALSE	TRUE
1370	12	7	171029_171110	p12_171029_171110_171110_a000	317	Pyramidal	FALSE	TRUE
1371	12	7	171029_171110	p12_171029_171110_171110_a000	318	Pyramidal	TRUE	FALSE
1372	12	7	171029_171110	p12_171029_171110_171110_a000	319	Pyramidal	FALSE	TRUE
1373	12	7	171029_171110	p12_171029_171110_171110_a000	320	Pyramidal	FALSE	FALSE
1374	12	7	171029_171110	p12_171029_171110_171110_a000	321	Pyramidal	FALSE	FALSE
1375	12	7	171029_171110	p12_171029_171110_171110_a000	322	Pyramidal	FALSE	TRUE
1376	12	7	171029_171110	p12_171029_171110_171110_a000	323	Pyramidal	FALSE	FALSE
1377	12	7	171029_171110	p12_171029_171110_171110_a000	324	Pyramidal	FALSE	FALSE
1378	12	7	171029_171110	p12_171029_171110_171110_a000	325	Pyramidal	FALSE	FALSE
1379	12	7	171029_171110	p12_171029_171110_171110_a000	326	Pyramidal	FALSE	TRUE
1380	12	7	171029_171110	p12_171029_171110_171110_a000	327	Pyramidal	FALSE	TRUE
1381	12	7	171029_171110	p12_171029_171110_171110_a000	328	Pyramidal	FALSE	FALSE
1382	12	7	171029_171110	p12_171029_171110_171110_a000	329	Pyramidal	TRUE	FALSE
1383	12	7	171029_171110	p12_171029_171110_171110_a000	330	Pyramidal	FALSE	FALSE
1384	12	7	171029_171110	p12_171029_171110_171110_a000	331	Pyramidal	FALSE	FALSE
1385	12	7	171029_171110	p12_171029_171110_171110_a000	332	Pyramidal	FALSE	FALSE
1386	12	7	171029_171110	p12_171029_171110_171110_a000	333	Pyramidal	FALSE	FALSE
1387	12	7	171029_171110	p12_171029_171110_171110_a000	334	Pyramidal	FALSE	TRUE
1388	12	7	171029_171110	p12_171029_171110_171110_a000	335	Pyramidal	FALSE	TRUE
1389	12	7	171029_171110	p12_171029_171110_171110_a000	336	Pyramidal	FALSE	FALSE
1390	12	7	171029_171110	p12_171029_171110_171110_a000	337	Pyramidal	FALSE	TRUE
1391	12	7	171029_171110	p12_171029_171110_171110_a000	338	Pyramidal	FALSE	TRUE
1392	12	7	171029_171110	p12_171029_171110_171110_a000	339	Pyramidal	FALSE	FALSE
1393	12	7	171029_171110	p12_171029_171110_171110_a000	340	Pyramidal	FALSE	FALSE
1394	12	7	171029_171110	p12_171029_171110_171110_a000	341	Pyramidal	FALSE	FALSE
1395	12	7	171029_171110	p12_171029_171110_171110_a000	342	Pyramidal	TRUE	TRUE
1396	12	7	171029_171110	p12_171029_171110_171110_a000	343	Pyramidal	FALSE	FALSE
1397	12	7	171029_171110	p12_171029_171110_171110_a000	344	Pyramidal	TRUE	FALSE
1398	12	7	171029_171110	p12_171029_171110_171110_a000	345	Pyramidal	FALSE	FALSE
1399	12	7	171029_171110	p12_171029_171110_171110_a000	346	Pyramidal	FALSE	TRUE
1400	12	7	171029_171110	p12_171029_171110_171110_a000	347	Pyramidal	FALSE	TRUE
1401	12	7	171029_171110	p12_171029_171110_171110_a000	348	Pyramidal	FALSE	FALSE
1402	12	7	171029_171110	p12_171029_171110_171110_a000	349	Pyramidal	FALSE	FALSE
1403	12	7	171029_171110	p12_171029_171110_171110_a000	350	Pyramidal	FALSE	TRUE
1404	12	7	171029_171110	p12_171029_171110_171110_a000	351	Pyramidal	FALSE	FALSE
1405	12	7	171029_171110	p12_171029_171110_171110_a000	352	Pyramidal	FALSE	FALSE
1406	12	7	171029_171110	p12_171029_171110_171110_a000	353	Pyramidal	FALSE	FALSE
1407	12	7	171029_171110	p12_171029_171110_171110_a000	354	Pyramidal	FALSE	FALSE
1408	12	7	171029_171110	p12_171029_171110_171110_a000	355	Pyramidal	FALSE	FALSE
1409	12	7	171029_171110	p12_171029_171110_171110_a000	356	Pyramidal	TRUE	TRUE
1410	12	7	171029_171110	p12_171029_171110_171110_a000	357	Pyramidal	FALSE	FALSE
1411	12	7	171029_171110	p12_171029_171110_171110_a000	358	Pyramidal	FALSE	TRUE
1412	12	7	171029_171110	p12_171029_171110_171110_a000	359	Pyramidal	FALSE	FALSE
1413	12	7	171029_171110	p12_171029_171110_171110_a000	360	Pyramidal	FALSE	FALSE
1414	12	7	171029_171110	p12_171029_171110_171110_a000	361	Pyramidal	FALSE	FALSE
1415	12	7	171029_171110	p12_171029_171110_171110_a000	362	Pyramidal	FALSE	FALSE
1416	12	7	171029_171110	p12_171029_171110_171110_a000	363	Pyramidal	FALSE	FALSE
1417	12	7	171029_171110	p12_171029_171110_171110_a000	364	Pyramidal	FALSE	FALSE
1418	12	7	171029_171110	p12_171029_171110_171110_a000	365	Pyramidal	FALSE	FALSE
1419	12	7	171029_171110	p12_171029_171110_171110_a000	366	Pyramidal	TRUE	TRUE
1420	12	7	171029_171110	p12_171029_171110_171110_a000	367	Pyramidal	FALSE	FALSE
1421	12	7	171029_171110	p12_171029_171110_171110_a000	368	Pyramidal	FALSE	FALSE
1422	12	7	171029_171110	p12_171029_171110_171110_a000	369	Pyramidal	FALSE	FALSE
1423	12	7	171029_171110	p12_171029_171110_171110_a000	370	Pyramidal	TRUE	TRUE
1424	12	7	171029_171110	p12_171029_171110_171110_a000	371	Pyramidal	FALSE	TRUE
1425	12	7	171029_171110	p12_171029_171110_171110_a000	372	Pyramidal	TRUE	TRUE
1426	12	7	171029_171110	p12_171029_171110_171110_a000	373	Pyramidal	FALSE	FALSE
1427	12	7	171029_171110	p12_171029_171110_171110_a000	374	Pyramidal	FALSE	FALSE
1428	12	7	171029_171110	p12_171029_171110_171110_a000	375	Pyramidal	FALSE	FALSE
1429	12	7	171029_171110	p12_171029_171110_171110_a000	376	Pyramidal	FALSE	FALSE
1430	12	7	171029_171110	p12_171029_171110_171110_a000	377	Pyramidal	FALSE	FALSE
1431	12	7	171029_171110	p12_171029_171110_171110_a000	378	Pyramidal	FALSE	FALSE
1432	12	7	171029_171110	p12_171029_171110_171110_a000	379	Pyramidal	FALSE	TRUE
1433	12	7	171029_171110	p12_171029_171110_171110_a000	380	Pyramidal	TRUE	TRUE
1434	12	7	171029_171110	p12_171029_171110_171110_a000	381	Pyramidal	FALSE	FALSE
1435	12	7	171029_171110	p12_171029_171110_171110_a000	382	Pyramidal	FALSE	TRUE
1436	12	7	171029_171110	p12_171029_171110_171110_a000	383	Pyramidal	TRUE	FALSE
1437	12	7	171029_171110	p12_171029_171110_171110_a000	384	Pyramidal	TRUE	TRUE
1438	12	7	171029_171110	p12_171029_171110_171110_a000	385	Pyramidal	TRUE	FALSE
1439	12	7	171029_171110	p12_171029_171110_171110_a000	386	Pyramidal	FALSE	TRUE
1440	12	7	171029_171110	p12_171029_171110_171110_a000	387	Pyramidal	FALSE	FALSE
1441	12	7	171029_171110	p12_171029_171110_171110_a000	388	Pyramidal	FALSE	TRUE
1442	12	7	171029_171110	p12_171029_171110_171110_a000	389	Pyramidal	FALSE	TRUE
1443	12	7	171029_171110	p12_171029_171110_171110_a000	390	Pyramidal	TRUE	TRUE
1444	12	7	171029_171110	p12_171029_171110_171110_a000	391	Pyramidal	FALSE	TRUE
1445	12	7	171029_171110	p12_171029_171110_171110_a000	392	Pyramidal	FALSE	FALSE
1446	12	7	171029_171110	p12_171029_171110_171110_a000	393	Pyramidal	FALSE	TRUE
1447	12	7	171029_171110	p12_171029_171110_171110_a000	394	Pyramidal	FALSE	TRUE
1448	12	7	171029_171110	p12_171029_171110_171110_a000	395	Pyramidal	FALSE	FALSE
1449	12	7	171029_171110	p12_171029_171110_171110_a000	396	Pyramidal	FALSE	TRUE
1450	12	7	171029_171110	p12_171029_171110_171110_a000	397	Pyramidal	FALSE	FALSE
1451	12	7	171029_171110	p12_171029_171110_171110_a000	398	Pyramidal	FALSE	TRUE
1452	12	7	171029_171110	p12_171029_171110_171110_a000	399	Pyramidal	FALSE	TRUE
1453	12	7	171029_171110	p12_171029_171110_171110_a000	400	Pyramidal	FALSE	FALSE
1454	12	7	171029_171110	p12_171029_171110_171110_a000	401	Pyramidal	FALSE	FALSE
1455	12	7	171029_171110	p12_171029_171110_171110_a000	402	Pyramidal	FALSE	TRUE
1456	12	7	171029_171110	p12_171029_171110_171110_a000	403	Pyramidal	FALSE	TRUE
1457	12	9.2	190828_190909	p12_190828_190909_190909_a000	0	Interneuron	TRUE	FALSE
1458	12	9.2	190828_190909	p12_190828_190909_190909_a000	1	Pyramidal	TRUE	FALSE
1459	12	9.2	190828_190909	p12_190828_190909_190909_a000	2	Interneuron	TRUE	FALSE
1460	12	9.2	190828_190909	p12_190828_190909_190909_a000	3	Interneuron	TRUE	FALSE
1461	12	9.2	190828_190909	p12_190828_190909_190909_a000	4	Pyramidal	TRUE	FALSE
1462	12	9.2	190828_190909	p12_190828_190909_190909_a000	5	Interneuron	FALSE	FALSE
1463	12	9.2	190828_190909	p12_190828_190909_190909_a000	6	Pyramidal	FALSE	FALSE
1464	12	9.2	190828_190909	p12_190828_190909_190909_a000	7	Interneuron	FALSE	FALSE
1465	12	9.2	190828_190909	p12_190828_190909_190909_a000	8	Interneuron	FALSE	FALSE
1466	12	9.2	190828_190909	p12_190828_190909_190909_a000	9	Pyramidal	FALSE	TRUE
1467	12	9.2	190828_190909	p12_190828_190909_190909_a000	10	Pyramidal	TRUE	FALSE
1468	12	9.2	190828_190909	p12_190828_190909_190909_a000	11	Interneuron	TRUE	FALSE
1469	12	9.2	190828_190909	p12_190828_190909_190909_a000	12	Pyramidal	FALSE	FALSE
1470	12	9.2	190828_190909	p12_190828_190909_190909_a000	13	Pyramidal	FALSE	FALSE
1471	12	9.2	190828_190909	p12_190828_190909_190909_a000	14	Interneuron	TRUE	FALSE
1472	12	9.2	190828_190909	p12_190828_190909_190909_a000	15	Interneuron	TRUE	FALSE
1473	12	9.2	190828_190909	p12_190828_190909_190909_a000	16	Pyramidal	FALSE	FALSE
1474	12	9.2	190828_190909	p12_190828_190909_190909_a000	17	Pyramidal	FALSE	FALSE
1475	12	9.2	190828_190909	p12_190828_190909_190909_a000	18	Pyramidal	FALSE	FALSE
1476	12	9.2	190828_190909	p12_190828_190909_190909_a000	19	Interneuron	TRUE	FALSE
1477	12	9.2	190828_190909	p12_190828_190909_190909_a000	20	Pyramidal	TRUE	FALSE
1478	12	9.2	190828_190909	p12_190828_190909_190909_a000	21	Pyramidal	FALSE	FALSE
1479	12	9.2	190828_190909	p12_190828_190909_190909_a000	22	Pyramidal	FALSE	TRUE
1480	12	9.2	190828_190909	p12_190828_190909_190909_a000	23	Interneuron	TRUE	FALSE
1481	12	9.2	190828_190909	p12_190828_190909_190909_a000	24	Pyramidal	FALSE	FALSE
1482	12	9.2	190828_190909	p12_190828_190909_190909_a000	25	Interneuron	TRUE	FALSE
1483	12	9.2	190828_190909	p12_190828_190909_190909_a000	26	Pyramidal	FALSE	FALSE
1484	12	9.2	190828_190909	p12_190828_190909_190909_a000	27	Pyramidal	FALSE	FALSE
1485	12	9.2	190828_190909	p12_190828_190909_190909_a000	28	Pyramidal	FALSE	FALSE
1486	12	9.2	190828_190909	p12_190828_190909_190909_a000	29	Interneuron	FALSE	FALSE
1487	12	9.2	190828_190909	p12_190828_190909_190909_a000	30	Interneuron	FALSE	TRUE
1488	12	9.2	190828_190909	p12_190828_190909_190909_a000	31	Pyramidal	FALSE	TRUE
1489	12	9.2	190828_190909	p12_190828_190909_190909_a000	32	Pyramidal	FALSE	TRUE
1490	12	9.2	190828_190909	p12_190828_190909_190909_a000	33	Pyramidal	FALSE	FALSE
1491	12	9.2	190828_190909	p12_190828_190909_190909_a000	34	Pyramidal	FALSE	FALSE
1492	12	9.2	190828_190909	p12_190828_190909_190909_a000	35	Pyramidal	FALSE	FALSE
1493	12	9.2	190828_190909	p12_190828_190909_190909_a000	36	Pyramidal	FALSE	FALSE
1494	12	9.2	190828_190909	p12_190828_190909_190909_a000	37	Interneuron	FALSE	FALSE
1495	12	9.2	190828_190909	p12_190828_190909_190909_a000	38	Pyramidal	FALSE	FALSE
1496	12	9.2	190828_190909	p12_190828_190909_190909_a000	39	Interneuron	FALSE	FALSE
1497	12	9.2	190828_190909	p12_190828_190909_190909_a000	40	Pyramidal	FALSE	FALSE
1498	12	9.2	190828_190909	p12_190828_190909_190909_a000	41	Pyramidal	FALSE	FALSE
1499	12	9.2	190828_190909	p12_190828_190909_190909_a000	42	Interneuron	FALSE	FALSE
1500	12	9.2	190828_190909	p12_190828_190909_190909_a000	43	Pyramidal	FALSE	FALSE
1501	12	9.2	190828_190909	p12_190828_190909_190909_a000	44	Pyramidal	TRUE	FALSE
1502	12	9.2	190828_190909	p12_190828_190909_190909_a000	45	Pyramidal	TRUE	FALSE
1503	12	9.2	190828_190909	p12_190828_190909_190909_a000	46	Pyramidal	TRUE	FALSE
1504	12	9.2	190828_190909	p12_190828_190909_190909_a000	47	Pyramidal	FALSE	TRUE
1505	12	9.2	190828_190909	p12_190828_190909_190909_a000	48	Pyramidal	FALSE	FALSE
1506	12	9.2	190828_190909	p12_190828_190909_190909_a000	49	Interneuron	TRUE	FALSE
1507	12	9.2	190828_190909	p12_190828_190909_190909_a000	50	Pyramidal	TRUE	FALSE
1508	12	9.2	190828_190909	p12_190828_190909_190909_a000	51	Pyramidal	TRUE	FALSE
1509	12	9.2	190828_190909	p12_190828_190909_190909_a000	52	Pyramidal	FALSE	FALSE
1510	12	9.2	190828_190909	p12_190828_190909_190909_a000	53	Pyramidal	FALSE	FALSE
1511	12	9.2	190828_190909	p12_190828_190909_190909_a000	54	Interneuron	FALSE	FALSE
1512	12	9.2	190828_190909	p12_190828_190909_190909_a000	55	Pyramidal	FALSE	TRUE
1513	12	9.2	190828_190909	p12_190828_190909_190909_a000	56	Interneuron	FALSE	FALSE
1514	12	9.2	190828_190909	p12_190828_190909_190909_a000	57	Interneuron	TRUE	FALSE
1515	12	9.2	190828_190909	p12_190828_190909_190909_a000	58	Pyramidal	FALSE	FALSE
1516	12	9.2	190828_190909	p12_190828_190909_190909_a000	59	Pyramidal	FALSE	TRUE
1517	12	9.2	190828_190909	p12_190828_190909_190909_a000	60	Interneuron	FALSE	FALSE
1518	12	9.2	190828_190909	p12_190828_190909_190909_a000	61	Pyramidal	FALSE	FALSE
1519	12	9.2	190828_190909	p12_190828_190909_190909_a000	62	Pyramidal	FALSE	FALSE
1520	12	9.2	190828_190909	p12_190828_190909_190909_a000	63	Interneuron	FALSE	FALSE
1521	12	9.2	190828_190909	p12_190828_190909_190909_a000	64	Pyramidal	FALSE	FALSE
1522	12	9.2	190828_190909	p12_190828_190909_190909_a000	65	Pyramidal	FALSE	FALSE
1523	12	9.2	190828_190909	p12_190828_190909_190909_a000	66	Pyramidal	FALSE	FALSE
1524	12	9.2	190828_190909	p12_190828_190909_190909_a000	67	Pyramidal	FALSE	TRUE
1525	12	9.2	190828_190909	p12_190828_190909_190909_a000	68	Pyramidal	TRUE	FALSE
1526	12	9.2	190828_190909	p12_190828_190909_190909_a000	69	Interneuron	FALSE	FALSE
1527	12	9.2	190828_190909	p12_190828_190909_190909_a000	70	Pyramidal	FALSE	TRUE
1528	12	9.2	190828_190909	p12_190828_190909_190909_a000	71	Interneuron	TRUE	FALSE
1529	12	9.2	190828_190909	p12_190828_190909_190909_a000	72	Pyramidal	FALSE	TRUE
1530	12	9.2	190828_190909	p12_190828_190909_190909_a000	73	Pyramidal	FALSE	FALSE
1531	12	9.2	190828_190909	p12_190828_190909_190909_a000	74	Interneuron	FALSE	FALSE
1532	12	9.2	190828_190909	p12_190828_190909_190909_a000	75	Pyramidal	FALSE	FALSE
1533	12	9.2	190828_190909	p12_190828_190909_190909_a000	76	Pyramidal	TRUE	FALSE
1534	12	9.2	190828_190909	p12_190828_190909_190909_a000	77	Pyramidal	FALSE	FALSE
1535	12	9.2	190828_190909	p12_190828_190909_190909_a000	78	Pyramidal	FALSE	FALSE
1536	12	9.2	190828_190909	p12_190828_190909_190909_a000	79	Pyramidal	FALSE	FALSE
1537	12	9.2	190828_190909	p12_190828_190909_190909_a000	80	Pyramidal	FALSE	FALSE
1538	12	9.2	190828_190909	p12_190828_190909_190909_a000	81	Interneuron	FALSE	FALSE
1539	12	9.2	190828_190909	p12_190828_190909_190909_a000	82	Pyramidal	TRUE	FALSE
1540	12	9.2	190828_190909	p12_190828_190909_190909_a000	83	Pyramidal	FALSE	FALSE
1541	12	9.2	190828_190909	p12_190828_190909_190909_a000	84	Pyramidal	FALSE	FALSE
1542	12	9.2	190828_190909	p12_190828_190909_190909_a000	85	Pyramidal	FALSE	FALSE
1543	12	9.2	190828_190909	p12_190828_190909_190909_a000	86	Pyramidal	FALSE	FALSE
1544	12	9.2	190828_190909	p12_190828_190909_190909_a000	87	Pyramidal	FALSE	FALSE
1545	12	9.2	190828_190909	p12_190828_190909_190909_a000	88	Pyramidal	FALSE	TRUE
1546	12	9.2	190828_190909	p12_190828_190909_190909_a000	89	Pyramidal	FALSE	TRUE
1547	12	9.2	190828_190909	p12_190828_190909_190909_a000	90	Pyramidal	FALSE	FALSE
1548	12	9.2	190828_190909	p12_190828_190909_190909_a000	91	Pyramidal	FALSE	FALSE
1549	12	9.2	190828_190909	p12_190828_190909_190909_a000	92	Pyramidal	FALSE	FALSE
1550	12	9.2	190828_190909	p12_190828_190909_190909_a000	93	Pyramidal	FALSE	FALSE
1551	12	9.2	190828_190909	p12_190828_190909_190909_a000	94	Interneuron	FALSE	FALSE
1552	12	9.2	190828_190909	p12_190828_190909_190909_a000	95	Pyramidal	FALSE	FALSE
1553	12	9.2	190828_190909	p12_190828_190909_190909_a000	96	Pyramidal	FALSE	FALSE
1554	12	9.2	190828_190909	p12_190828_190909_190909_a000	97	Pyramidal	FALSE	TRUE
1555	12	9.2	190828_190909	p12_190828_190909_190909_a000	98	Pyramidal	FALSE	FALSE
1556	12	9.2	190828_190909	p12_190828_190909_190909_a000	99	Interneuron	TRUE	FALSE
1557	12	9.2	190828_190909	p12_190828_190909_190909_a000	100	Pyramidal	FALSE	TRUE
1558	12	9.2	190828_190909	p12_190828_190909_190909_a000	101	Pyramidal	FALSE	FALSE
1559	12	9.2	190828_190909	p12_190828_190909_190909_a000	102	Pyramidal	FALSE	FALSE
1560	12	9.2	190828_190909	p12_190828_190909_190909_a000	103	Interneuron	TRUE	FALSE
1561	12	9.2	190828_190909	p12_190828_190909_190909_a000	104	Pyramidal	FALSE	TRUE
1562	12	9.2	190828_190909	p12_190828_190909_190909_a000	105	Pyramidal	FALSE	FALSE
1563	12	9.2	190828_190909	p12_190828_190909_190909_a000	106	Pyramidal	FALSE	TRUE
1564	12	9.2	190828_190909	p12_190828_190909_190909_a000	107	Pyramidal	FALSE	FALSE
1565	12	9.2	190828_190909	p12_190828_190909_190909_a000	108	Pyramidal	FALSE	FALSE
1566	12	9.2	190828_190909	p12_190828_190909_190909_a000	109	Pyramidal	FALSE	TRUE
1567	12	9.2	190828_190909	p12_190828_190909_190909_a000	110	Pyramidal	FALSE	TRUE
1568	12	9.2	190828_190909	p12_190828_190909_190909_a000	111	Pyramidal	FALSE	TRUE
1569	12	9.2	190828_190909	p12_190828_190909_190909_a000	112	Pyramidal	FALSE	FALSE
1570	12	9.2	190828_190909	p12_190828_190909_190909_a000	113	Pyramidal	FALSE	FALSE
1571	12	9.2	190828_190909	p12_190828_190909_190909_a000	114	Pyramidal	FALSE	FALSE
1572	12	9.2	190828_190909	p12_190828_190909_190909_a000	115	Pyramidal	FALSE	FALSE
1573	12	9.2	190828_190909	p12_190828_190909_190909_a000	116	Pyramidal	FALSE	FALSE
1574	12	9.2	190828_190909	p12_190828_190909_190909_a000	117	Interneuron	FALSE	FALSE
1575	12	9.2	190828_190909	p12_190828_190909_190909_a000	118	Pyramidal	FALSE	FALSE
1576	12	9.2	190828_190909	p12_190828_190909_190909_a000	119	Pyramidal	FALSE	TRUE
1577	12	9.2	190828_190909	p12_190828_190909_190909_a000	120	Pyramidal	FALSE	FALSE
1578	12	9.2	190828_190909	p12_190828_190909_190909_a000	121	Pyramidal	FALSE	FALSE
1579	12	9.2	190828_190909	p12_190828_190909_190909_a000	122	Pyramidal	FALSE	TRUE
1580	12	9.2	190828_190909	p12_190828_190909_190909_a000	123	Pyramidal	FALSE	FALSE
1581	12	9.2	190828_190909	p12_190828_190909_190909_a000	124	Interneuron	FALSE	FALSE
1582	12	9.2	190828_190909	p12_190828_190909_190909_a000	125	Pyramidal	FALSE	FALSE
1583	12	9.2	190828_190909	p12_190828_190909_190909_a000	126	Pyramidal	FALSE	FALSE
1584	12	9.2	190828_190909	p12_190828_190909_190909_a000	127	Pyramidal	FALSE	FALSE
1585	12	9.2	190828_190909	p12_190828_190909_190909_a000	128	Pyramidal	TRUE	FALSE
1586	12	9.2	190828_190909	p12_190828_190909_190909_a000	129	Pyramidal	FALSE	FALSE
1587	12	9.2	190828_190909	p12_190828_190909_190909_a000	130	Pyramidal	FALSE	TRUE
1588	12	9.2	190828_190909	p12_190828_190909_190909_a000	131	Pyramidal	FALSE	FALSE
1589	12	9.2	190828_190909	p12_190828_190909_190909_a000	132	Pyramidal	FALSE	FALSE
1590	12	9.2	190828_190909	p12_190828_190909_190909_a000	133	Pyramidal	FALSE	FALSE
1591	12	9.2	190828_190909	p12_190828_190909_190909_a000	134	Pyramidal	FALSE	FALSE
1592	12	9.2	190828_190909	p12_190828_190909_190909_a000	135	Pyramidal	FALSE	FALSE
1593	12	9.2	190828_190909	p12_190828_190909_190909_a000	136	Pyramidal	TRUE	FALSE
1594	12	9.2	190828_190909	p12_190828_190909_190909_a000	137	Pyramidal	FALSE	TRUE
1595	12	9.2	190828_190909	p12_190828_190909_190909_a000	138	Pyramidal	FALSE	FALSE
1596	12	9.2	190828_190909	p12_190828_190909_190909_a000	139	Pyramidal	FALSE	FALSE
1597	12	9.2	190828_190909	p12_190828_190909_190909_a000	140	Interneuron	FALSE	FALSE
1598	12	9.2	190828_190909	p12_190828_190909_190909_a000	141	Pyramidal	FALSE	FALSE
1599	12	9.2	190828_190909	p12_190828_190909_190909_a000	142	Interneuron	FALSE	FALSE
1600	12	9.2	190828_190909	p12_190828_190909_190909_a000	143	Pyramidal	FALSE	FALSE
1601	12	9.2	190828_190909	p12_190828_190909_190909_a000	144	Pyramidal	FALSE	FALSE
1602	12	9.2	190828_190909	p12_190828_190909_190909_a000	145	Interneuron	FALSE	FALSE
1603	12	9.2	190828_190909	p12_190828_190909_190909_a000	146	Pyramidal	FALSE	FALSE
1604	12	9.2	190828_190909	p12_190828_190909_190909_a000	147	Pyramidal	FALSE	FALSE
1605	12	9.2	190828_190909	p12_190828_190909_190909_a000	148	Pyramidal	FALSE	FALSE
1606	12	9.2	190828_190909	p12_190828_190909_190909_a000	149	Pyramidal	FALSE	FALSE
1607	12	9.2	190828_190909	p12_190828_190909_190909_a000	150	Pyramidal	FALSE	TRUE
1608	12	9.2	190828_190909	p12_190828_190909_190909_a000	151	Pyramidal	FALSE	TRUE
1609	12	9.2	190828_190909	p12_190828_190909_190909_a000	152	Pyramidal	FALSE	FALSE
1610	12	9.2	190828_190909	p12_190828_190909_190909_a000	153	Pyramidal	FALSE	FALSE
1611	12	9.2	190828_190909	p12_190828_190909_190909_a000	154	Pyramidal	FALSE	FALSE
1612	12	9.2	190828_190909	p12_190828_190909_190909_a000	155	Pyramidal	FALSE	FALSE
1613	12	9.2	190828_190909	p12_190828_190909_190909_a000	156	Pyramidal	FALSE	FALSE
1614	12	9.2	190828_190909	p12_190828_190909_190909_a000	157	Pyramidal	FALSE	TRUE
1615	12	9.2	190828_190909	p12_190828_190909_190909_a000	158	Pyramidal	FALSE	TRUE
1616	12	9.2	190828_190909	p12_190828_190909_190909_a000	159	Pyramidal	FALSE	FALSE
1617	12	9.2	190828_190909	p12_190828_190909_190909_a000	160	Interneuron	TRUE	FALSE
1618	12	9.2	190828_190909	p12_190828_190909_190909_a000	161	Pyramidal	FALSE	FALSE
1619	12	9.2	190828_190909	p12_190828_190909_190909_a000	162	Pyramidal	FALSE	TRUE
1620	12	9.2	190828_190909	p12_190828_190909_190909_a000	163	Pyramidal	FALSE	FALSE
1621	12	9.2	190828_190909	p12_190828_190909_190909_a000	164	Pyramidal	FALSE	FALSE
1622	12	9.2	190828_190909	p12_190828_190909_190909_a000	165	Pyramidal	FALSE	FALSE
1623	12	9.2	190828_190909	p12_190828_190909_190909_a000	166	Pyramidal	FALSE	TRUE
1624	12	9.2	190828_190909	p12_190828_190909_190909_a000	167	Pyramidal	FALSE	FALSE
1625	12	9.2	190828_190909	p12_190828_190909_190909_a000	168	Interneuron	FALSE	FALSE
1626	12	9.2	190828_190909	p12_190828_190909_190909_a000	169	Pyramidal	FALSE	FALSE
1627	12	9.2	190828_190909	p12_190828_190909_190909_a000	170	Pyramidal	FALSE	TRUE
1628	12	9.2	190828_190909	p12_190828_190909_190909_a000	171	Pyramidal	FALSE	FALSE
1629	12	9.2	190828_190909	p12_190828_190909_190909_a000	172	Pyramidal	FALSE	FALSE
1630	12	9.2	190828_190909	p12_190828_190909_190909_a000	173	Interneuron	FALSE	FALSE
1631	12	9.2	190828_190909	p12_190828_190909_190909_a000	174	Pyramidal	FALSE	FALSE
1632	12	9.2	190828_190909	p12_190828_190909_190909_a000	175	Pyramidal	FALSE	FALSE
1633	12	9.2	190828_190909	p12_190828_190909_190909_a000	176	Pyramidal	FALSE	TRUE
1634	12	9.2	190828_190909	p12_190828_190909_190909_a000	177	Pyramidal	FALSE	FALSE
1635	12	9.2	190828_190909	p12_190828_190909_190909_a000	178	Pyramidal	FALSE	FALSE
1636	12	9.2	190828_190909	p12_190828_190909_190909_a000	179	Pyramidal	FALSE	FALSE
1637	12	9.2	190828_190909	p12_190828_190909_190909_a000	180	Pyramidal	FALSE	FALSE
1638	12	9.2	190828_190909	p12_190828_190909_190909_a000	181	Pyramidal	FALSE	FALSE
1639	12	9.2	190828_190909	p12_190828_190909_190909_a000	182	Pyramidal	FALSE	FALSE
1640	12	9.2	190828_190909	p12_190828_190909_190909_a000	183	Pyramidal	FALSE	FALSE
1641	12	9.2	190828_190909	p12_190828_190909_190909_a000	184	Pyramidal	FALSE	TRUE
1642	12	9.2	190828_190909	p12_190828_190909_190909_a000	185	Pyramidal	FALSE	TRUE
1643	12	9.2	190828_190909	p12_190828_190909_190909_a000	186	Pyramidal	TRUE	FALSE
1644	12	9.2	190828_190909	p12_190828_190909_190909_a000	187	Pyramidal	FALSE	TRUE
1645	12	9.2	190828_190909	p12_190828_190909_190909_a000	188	Pyramidal	FALSE	FALSE
1646	12	9.2	190828_190909	p12_190828_190909_190909_a000	189	Interneuron	TRUE	FALSE
1647	12	9.2	190828_190909	p12_190828_190909_190909_a000	190	Pyramidal	FALSE	FALSE
1648	12	9.2	190828_190909	p12_190828_190909_190909_a000	191	Pyramidal	FALSE	TRUE
1649	12	9.2	190828_190909	p12_190828_190909_190909_a000	192	Pyramidal	FALSE	TRUE
1650	12	9.2	190828_190909	p12_190828_190909_190909_a000	193	Pyramidal	FALSE	TRUE
1651	12	9.2	190828_190909	p12_190828_190909_190909_a000	194	Pyramidal	FALSE	TRUE
1652	12	9.2	190828_190909	p12_190828_190909_190909_a000	195	Pyramidal	FALSE	TRUE
1653	12	9.2	190828_190909	p12_190828_190909_190909_a000	196	Interneuron	TRUE	FALSE
1654	12	9.2	190828_190909	p12_190828_190909_190909_a000	197	Pyramidal	TRUE	FALSE
1655	12	9.2	190828_190909	p12_190828_190909_190909_a000	198	Pyramidal	FALSE	FALSE
1656	12	9.2	190828_190909	p12_190828_190909_190909_a000	199	Pyramidal	FALSE	FALSE
1657	12	9.2	190828_190909	p12_190828_190909_190909_a000	200	Pyramidal	FALSE	FALSE
1658	12	9.2	190828_190909	p12_190828_190909_190909_a000	201	Pyramidal	FALSE	FALSE
1659	12	9.2	190828_190909	p12_190828_190909_190909_a000	202	Pyramidal	FALSE	TRUE
1660	12	9.2	190828_190909	p12_190828_190909_190909_a000	203	Pyramidal	FALSE	FALSE
1661	12	9.2	190828_190909	p12_190828_190909_190909_a000	204	Pyramidal	FALSE	TRUE
1662	12	9.2	190828_190909	p12_190828_190909_190909_a000	205	Pyramidal	FALSE	TRUE
1663	12	9.2	190828_190909	p12_190828_190909_190909_a000	206	Pyramidal	TRUE	FALSE
1664	12	9.2	190828_190909	p12_190828_190909_190909_a000	207	Pyramidal	FALSE	FALSE
1665	12	9.2	190828_190909	p12_190828_190909_190909_a000	208	Pyramidal	FALSE	FALSE
1666	12	9.2	190828_190909	p12_190828_190909_190909_a000	209	Pyramidal	TRUE	FALSE
1667	12	9.2	190828_190909	p12_190828_190909_190909_a000	210	Interneuron	FALSE	FALSE
1668	12	9.2	190828_190909	p12_190828_190909_190909_a000	211	Interneuron	FALSE	FALSE
1669	12	9.2	190828_190909	p12_190828_190909_190909_a000	212	Pyramidal	TRUE	FALSE
1670	12	9.2	190828_190909	p12_190828_190909_190909_a000	213	Pyramidal	FALSE	FALSE
1671	12	9.2	190828_190909	p12_190828_190909_190909_a000	214	Pyramidal	TRUE	FALSE
1672	12	9.2	190828_190909	p12_190828_190909_190909_a000	215	Pyramidal	TRUE	TRUE
1673	12	9.2	190828_190909	p12_190828_190909_190909_a000	216	Pyramidal	FALSE	FALSE
1674	12	9.2	190828_190909	p12_190828_190909_190909_a000	217	Pyramidal	FALSE	FALSE
1675	12	9.2	190828_190909	p12_190828_190909_190909_a000	218	Pyramidal	FALSE	FALSE
1676	12	9.2	190828_190909	p12_190828_190909_190909_a000	219	Pyramidal	FALSE	TRUE
1677	12	9.2	190828_190909	p12_190828_190909_190909_a000	220	Pyramidal	FALSE	FALSE
1678	12	9.2	190828_190909	p12_190828_190909_190909_a000	221	Pyramidal	FALSE	FALSE
1679	12	9.2	190828_190909	p12_190828_190909_190909_a000	222	Pyramidal	FALSE	FALSE
1680	12	9.2	190828_190909	p12_190828_190909_190909_a000	223	Pyramidal	FALSE	FALSE
1681	12	9.2	190828_190909	p12_190828_190909_190909_a000	224	Pyramidal	FALSE	FALSE
1682	12	9.2	190828_190909	p12_190828_190909_190909_a000	225	Pyramidal	FALSE	FALSE
1683	12	9.2	190828_190909	p12_190828_190909_190909_a000	226	Pyramidal	FALSE	FALSE
1684	12	9.2	190828_190909	p12_190828_190909_190909_a000	227	Pyramidal	FALSE	TRUE
1685	12	9.2	190828_190909	p12_190828_190909_190909_a000	228	Pyramidal	FALSE	TRUE
1686	12	9.2	190828_190909	p12_190828_190909_190909_a000	229	Pyramidal	FALSE	FALSE
1687	12	9.2	190828_190909	p12_190828_190909_190909_a000	230	Pyramidal	FALSE	TRUE
1688	12	9.2	190828_190909	p12_190828_190909_190909_a000	231	Pyramidal	FALSE	FALSE
1689	12	9.2	190828_190909	p12_190828_190909_190909_a000	232	Pyramidal	FALSE	FALSE
1690	12	9.2	190828_190909	p12_190828_190909_190909_a000	233	Pyramidal	FALSE	FALSE
1691	12	9.2	190828_190909	p12_190828_190909_190909_a000	234	Interneuron	FALSE	FALSE
1692	12	9.2	190828_190909	p12_190828_190909_190909_a000	235	Pyramidal	FALSE	FALSE
1693	12	9.2	190828_190909	p12_190828_190909_190909_a000	236	Pyramidal	FALSE	TRUE
1694	12	9.2	190828_190909	p12_190828_190909_190909_a000	237	Interneuron	FALSE	FALSE
1695	12	9.2	190828_190909	p12_190828_190909_190909_a000	238	Pyramidal	FALSE	FALSE
1696	12	9.2	190828_190909	p12_190828_190909_190909_a000	239	Pyramidal	FALSE	TRUE
1697	12	9.2	190828_190909	p12_190828_190909_190909_a000	240	Pyramidal	FALSE	FALSE
1698	12	9.2	190828_190909	p12_190828_190909_190909_a000	241	Pyramidal	FALSE	FALSE
1699	12	9.2	190828_190909	p12_190828_190909_190909_a000	242	Pyramidal	FALSE	FALSE
1700	12	9.2	190828_190909	p12_190828_190909_190909_a000	243	Pyramidal	FALSE	FALSE
1701	12	9.2	190828_190909	p12_190828_190909_190909_a000	244	Pyramidal	FALSE	FALSE
1702	12	9.2	190828_190909	p12_190828_190909_190909_a000	245	Pyramidal	FALSE	TRUE
1703	12	9.2	190828_190909	p12_190828_190909_190909_a000	246	Pyramidal	FALSE	FALSE
1704	12	9.2	190828_190909	p12_190828_190909_190909_a000	247	Interneuron	FALSE	FALSE
1705	12	9.2	190828_190909	p12_190828_190909_190909_a000	248	Pyramidal	FALSE	TRUE
1706	12	9.2	190828_190909	p12_190828_190909_190909_a000	249	Pyramidal	FALSE	FALSE
1707	12	9.2	190828_190909	p12_190828_190909_190909_a000	250	Pyramidal	FALSE	FALSE
1708	12	9.2	190828_190909	p12_190828_190909_190909_a000	251	Interneuron	TRUE	FALSE
1709	12	9.2	190828_190909	p12_190828_190909_190909_a000	252	Pyramidal	FALSE	FALSE
1710	12	9.2	190828_190909	p12_190828_190909_190909_a000	253	Pyramidal	FALSE	FALSE
1711	12	9.2	190828_190909	p12_190828_190909_190909_a000	254	Pyramidal	FALSE	FALSE
1712	12	9.2	190828_190909	p12_190828_190909_190909_a000	255	Pyramidal	TRUE	FALSE
1713	12	9.2	190828_190909	p12_190828_190909_190909_a000	256	Pyramidal	FALSE	FALSE
1714	12	9.2	190828_190909	p12_190828_190909_190909_a000	257	Pyramidal	FALSE	FALSE
1715	12	9.2	190828_190909	p12_190828_190909_190909_a000	258	Pyramidal	FALSE	FALSE
1716	12	9.2	190828_190909	p12_190828_190909_190909_a000	259	Pyramidal	FALSE	FALSE
1717	12	9.2	190828_190909	p12_190828_190909_190909_a000	260	Pyramidal	TRUE	FALSE
1718	12	9.2	190828_190909	p12_190828_190909_190909_a000	261	Pyramidal	FALSE	FALSE
1719	12	9.2	190828_190909	p12_190828_190909_190909_a000	262	Pyramidal	FALSE	FALSE
1720	12	9.2	190828_190909	p12_190828_190909_190909_a000	263	Pyramidal	TRUE	FALSE
1721	12	9.2	190828_190909	p12_190828_190909_190909_a000	264	Interneuron	FALSE	TRUE
1722	12	9.2	190828_190909	p12_190828_190909_190909_a000	265	Interneuron	FALSE	FALSE
1723	12	9.2	190828_190909	p12_190828_190909_190909_a000	266	Pyramidal	FALSE	TRUE
1724	12	9.2	190828_190909	p12_190828_190909_190909_a000	267	Pyramidal	FALSE	FALSE
1725	12	9.2	190828_190909	p12_190828_190909_190909_a000	268	Pyramidal	FALSE	FALSE
1726	12	9.2	190828_190909	p12_190828_190909_190909_a000	269	Pyramidal	FALSE	FALSE
1727	12	9.2	190828_190909	p12_190828_190909_190909_a000	270	Pyramidal	FALSE	FALSE
1728	12	9.2	190828_190909	p12_190828_190909_190909_a000	271	Pyramidal	FALSE	TRUE
1729	12	9.2	190828_190909	p12_190828_190909_190909_a000	272	Pyramidal	FALSE	FALSE
1730	12	9.2	190828_190909	p12_190828_190909_190909_a000	273	Pyramidal	FALSE	FALSE
1731	12	9.2	190828_190909	p12_190828_190909_190909_a000	274	Pyramidal	FALSE	TRUE
1732	12	9.2	190828_190909	p12_190828_190909_190909_a000	275	Pyramidal	FALSE	TRUE
1733	12	9.2	190828_190909	p12_190828_190909_190909_a000	276	Pyramidal	FALSE	FALSE
1734	12	9.2	190828_190909	p12_190828_190909_190909_a000	277	Pyramidal	FALSE	TRUE
1735	12	9.2	190828_190909	p12_190828_190909_190909_a000	278	Pyramidal	FALSE	TRUE
1736	12	9.2	190828_190909	p12_190828_190909_190909_a000	279	Pyramidal	FALSE	FALSE
1737	12	9.2	190828_190909	p12_190828_190909_190909_a000	280	Pyramidal	FALSE	FALSE
1738	12	9.2	190828_190909	p12_190828_190909_190909_a000	281	Pyramidal	FALSE	FALSE
1739	12	9.2	190828_190909	p12_190828_190909_190909_a000	282	Pyramidal	FALSE	FALSE
1740	12	9.2	190828_190909	p12_190828_190909_190909_a000	283	Pyramidal	FALSE	FALSE
1741	12	9.2	190828_190909	p12_190828_190909_190909_a000	284	Pyramidal	FALSE	FALSE
1742	12	9.2	190828_190909	p12_190828_190909_190909_a000	285	Pyramidal	FALSE	FALSE
1743	12	9.2	190828_190909	p12_190828_190909_190909_a000	286	Pyramidal	FALSE	FALSE
1744	12	9.2	190828_190909	p12_190828_190909_190909_a000	287	Pyramidal	FALSE	FALSE
1745	12	9.2	190828_190909	p12_190828_190909_190909_a000	288	Pyramidal	FALSE	FALSE
1746	12	9.2	190828_190909	p12_190828_190909_190909_a000	289	Pyramidal	FALSE	FALSE
1747	12	9.2	190828_190909	p12_190828_190909_190909_a000	290	Pyramidal	FALSE	TRUE
1748	12	9.2	190828_190909	p12_190828_190909_190909_a000	291	Pyramidal	FALSE	TRUE
1749	12	9.2	190828_190909	p12_190828_190909_190909_a000	292	Pyramidal	FALSE	FALSE
1750	12	9.2	190828_190909	p12_190828_190909_190909_a000	293	Pyramidal	FALSE	TRUE
1751	12	9.2	190828_190909	p12_190828_190909_190909_a000	294	Pyramidal	FALSE	FALSE
1752	12	9.2	190828_190909	p12_190828_190909_190909_a000	295	Pyramidal	FALSE	FALSE
1753	12	9.2	190828_190909	p12_190828_190909_190909_a000	296	Pyramidal	FALSE	FALSE
1754	12	9.2	190828_190909	p12_190828_190909_190909_a000	297	Pyramidal	FALSE	TRUE
1755	12	9.2	190828_190909	p12_190828_190909_190909_a000	298	Pyramidal	FALSE	FALSE
1756	12	9.2	190828_190909	p12_190828_190909_190909_a000	299	Pyramidal	FALSE	TRUE
1757	12	9.2	190828_190909	p12_190828_190909_190909_a000	300	Pyramidal	FALSE	FALSE
1758	12	9.2	190828_190909	p12_190828_190909_190909_a000	301	Pyramidal	FALSE	FALSE
1759	12	9.2	190828_190909	p12_190828_190909_190909_a000	302	Pyramidal	FALSE	FALSE
1760	12	9.2	190828_190909	p12_190828_190909_190909_a000	303	Interneuron	FALSE	FALSE
1761	12	9.2	190828_190909	p12_190828_190909_190909_a000	304	Pyramidal	FALSE	FALSE
1762	12	9.2	190828_190909	p12_190828_190909_190909_a000	305	Pyramidal	FALSE	FALSE
1763	12	9.2	190828_190909	p12_190828_190909_190909_a000	306	Pyramidal	FALSE	FALSE
1764	12	9.2	190828_190909	p12_190828_190909_190909_a000	307	Pyramidal	FALSE	FALSE
1765	12	9.2	190828_190909	p12_190828_190909_190909_a000	308	Pyramidal	FALSE	FALSE
1766	12	9.2	190828_190909	p12_190828_190909_190909_a000	309	Pyramidal	FALSE	TRUE
1767	12	9.2	190828_190909	p12_190828_190909_190909_a000	310	Pyramidal	FALSE	FALSE
1768	12	9.2	190828_190909	p12_190828_190909_190909_a000	311	Pyramidal	FALSE	FALSE
1769	12	9.2	190828_190909	p12_190828_190909_190909_a000	312	Pyramidal	FALSE	TRUE
1770	12	9.2	190828_190909	p12_190828_190909_190909_a000	313	Pyramidal	FALSE	FALSE
1771	12	9.2	190828_190909	p12_190828_190909_190909_a000	314	Pyramidal	FALSE	FALSE
1772	12	9.2	190828_190909	p12_190828_190909_190909_a000	315	Pyramidal	FALSE	FALSE
1773	12	9.2	190828_190909	p12_190828_190909_190909_a000	316	Pyramidal	FALSE	FALSE
1774	12	9.2	190828_190909	p12_190828_190909_190909_a000	317	Pyramidal	FALSE	TRUE
1775	12	9.2	190828_190909	p12_190828_190909_190909_a000	318	Pyramidal	FALSE	FALSE
1776	12	9.2	190828_190909	p12_190828_190909_190909_a000	319	Pyramidal	FALSE	TRUE
1777	12	9.2	190828_190909	p12_190828_190909_190909_a000	320	Pyramidal	FALSE	FALSE
1778	12	9.2	190828_190909	p12_190828_190909_190909_a000	321	Pyramidal	FALSE	FALSE
1779	12	9.2	190828_190909	p12_190828_190909_190909_a000	322	Pyramidal	FALSE	FALSE
1780	12	9.2	190828_190909	p12_190828_190909_190909_a000	323	Interneuron	FALSE	FALSE
1781	12	9.2	190828_190909	p12_190828_190909_190909_a000	324	Pyramidal	FALSE	FALSE
1782	12	9.2	190828_190909	p12_190828_190909_190909_a000	325	Pyramidal	FALSE	FALSE
1783	12	9.2	190828_190909	p12_190828_190909_190909_a000	326	Pyramidal	FALSE	FALSE
1784	12	9.2	190828_190909	p12_190828_190909_190909_a000	327	Pyramidal	FALSE	TRUE
1785	12	9.2	190828_190909	p12_190828_190909_190909_a000	328	Pyramidal	FALSE	TRUE
1786	12	9.2	190828_190909	p12_190828_190909_190909_a000	329	Pyramidal	FALSE	FALSE
1787	12	9.2	190828_190909	p12_190828_190909_190909_a000	330	Pyramidal	FALSE	FALSE
1788	12	9.2	190828_190909	p12_190828_190909_190909_a000	331	Pyramidal	FALSE	TRUE
1789	12	9.2	190828_190909	p12_190828_190909_190909_a000	332	Pyramidal	FALSE	FALSE
1790	12	9.2	190828_190909	p12_190828_190909_190909_a000	333	Pyramidal	FALSE	TRUE
1791	12	9.2	190828_190909	p12_190828_190909_190909_a000	334	Pyramidal	FALSE	TRUE
1792	12	9.2	190828_190909	p12_190828_190909_190909_a000	335	Pyramidal	TRUE	TRUE
1793	12	9.2	190828_190909	p12_190828_190909_190909_a000	336	Pyramidal	FALSE	FALSE
1794	12	9.2	190828_190909	p12_190828_190909_190909_a000	337	Pyramidal	FALSE	FALSE
1795	12	9.2	190828_190909	p12_190828_190909_190909_a000	338	Pyramidal	FALSE	FALSE
1796	12	9.2	190828_190909	p12_190828_190909_190909_a000	339	Pyramidal	FALSE	FALSE
1797	12	9.2	190828_190909	p12_190828_190909_190909_a000	340	Pyramidal	TRUE	FALSE
1798	12	9.2	190828_190909	p12_190828_190909_190909_a000	341	Pyramidal	FALSE	FALSE
1799	12	9.2	190828_190909	p12_190828_190909_190909_a000	342	Pyramidal	FALSE	TRUE
1800	12	9.2	190828_190909	p12_190828_190909_190909_a000	343	Pyramidal	FALSE	TRUE
1801	12	9.2	190828_190909	p12_190828_190909_190909_a000	344	Pyramidal	FALSE	TRUE
1802	12	9.2	190828_190909	p12_190828_190909_190909_a000	345	Pyramidal	FALSE	FALSE
1803	12	9.2	190828_190909	p12_190828_190909_190909_a000	346	Pyramidal	FALSE	FALSE
1804	12	9.2	190828_190909	p12_190828_190909_190909_a000	347	Pyramidal	FALSE	TRUE
1805	12	9.2	190828_190909	p12_190828_190909_190909_a000	348	Pyramidal	FALSE	FALSE
1806	12	9.2	190828_190909	p12_190828_190909_190909_a000	349	Pyramidal	FALSE	FALSE
1807	12	9.2	190828_190909	p12_190828_190909_190909_a000	350	Pyramidal	FALSE	TRUE
1808	12	9.2	190828_190909	p12_190828_190909_190909_a000	351	Pyramidal	TRUE	FALSE
1809	12	9.2	190828_190909	p12_190828_190909_190909_a000	352	Pyramidal	TRUE	TRUE
1810	12	9.2	190828_190909	p12_190828_190909_190909_a000	353	Pyramidal	FALSE	FALSE
1811	12	9.2	190828_190909	p12_190828_190909_190909_a000	354	Pyramidal	FALSE	FALSE
1812	12	9.2	190828_190909	p12_190828_190909_190909_a000	355	Pyramidal	FALSE	FALSE
1813	12	9.2	190828_190909	p12_190828_190909_190909_a000	356	Pyramidal	FALSE	FALSE
1814	12	9.2	190828_190909	p12_190828_190909_190909_a000	357	Pyramidal	FALSE	FALSE
1815	12	9.2	190828_190909	p12_190828_190909_190909_a000	358	Pyramidal	TRUE	FALSE
1816	12	9.2	190828_190909	p12_190828_190909_190909_a000	359	Pyramidal	FALSE	TRUE
1817	12	9.2	190828_190909	p12_190828_190909_190909_a000	360	Pyramidal	FALSE	FALSE
1818	12	9.2	190828_190909	p12_190828_190909_190909_a000	361	Pyramidal	FALSE	FALSE
1819	12	9.2	190828_190909	p12_190828_190909_190909_a000	362	Pyramidal	FALSE	TRUE
1820	12	9.2	190828_190909	p12_190828_190909_190909_a000	363	Pyramidal	FALSE	FALSE
1821	12	9.2	190828_190909	p12_190828_190909_190909_a000	364	Pyramidal	TRUE	TRUE
1822	12	9.2	190828_190909	p12_190828_190909_190909_a000	365	Pyramidal	FALSE	FALSE
1823	12	9.2	190828_190909	p12_190828_190909_190909_a000	366	Pyramidal	FALSE	FALSE
1824	12	9.2	190828_190909	p12_190828_190909_190909_a000	367	Pyramidal	FALSE	TRUE
1825	12	9.2	190828_190909	p12_190828_190909_190909_a000	368	Pyramidal	FALSE	FALSE
1826	12	9.2	190828_190909	p12_190828_190909_190909_a000	369	Pyramidal	FALSE	FALSE
1827	12	9.2	190828_190909	p12_190828_190909_190909_a000	370	Pyramidal	TRUE	FALSE
1828	12	9.2	190828_190909	p12_190828_190909_190909_a000	371	Pyramidal	FALSE	TRUE
1829	12	9.2	190828_190909	p12_190828_190909_190909_a000	372	Pyramidal	FALSE	FALSE
1830	12	9.2	190828_190909	p12_190828_190909_190909_a000	373	Interneuron	FALSE	FALSE
1831	12	9.2	190828_190909	p12_190828_190909_190909_a000	374	Pyramidal	FALSE	FALSE
1832	12	9.2	190828_190909	p12_190828_190909_190909_a000	375	Pyramidal	TRUE	FALSE
1833	12	9.2	190828_190909	p12_190828_190909_190909_a000	376	Pyramidal	FALSE	TRUE
1834	12	9.2	190828_190909	p12_190828_190909_190909_a000	377	Pyramidal	FALSE	FALSE
1835	12	9.2	190828_190909	p12_190828_190909_190909_a000	378	Pyramidal	FALSE	TRUE
1836	12	9.2	190828_190909	p12_190828_190909_190909_a000	379	Pyramidal	FALSE	FALSE
1837	12	9.2	190828_190909	p12_190828_190909_190909_a000	380	Pyramidal	FALSE	FALSE
1838	12	9.2	190828_190909	p12_190828_190909_190909_a000	381	Pyramidal	FALSE	FALSE
1839	12	9.2	190828_190909	p12_190828_190909_190909_a000	382	Pyramidal	FALSE	FALSE
1840	12	9.2	190828_190909	p12_190828_190909_190909_a000	383	Pyramidal	TRUE	FALSE
1841	12	9.2	190828_190909	p12_190828_190909_190909_a000	384	Pyramidal	FALSE	FALSE
1842	12	9.2	190828_190909	p12_190828_190909_190909_a000	385	Pyramidal	FALSE	FALSE
1843	12	9.2	190828_190909	p12_190828_190909_190909_a000	386	Pyramidal	FALSE	FALSE
1844	12	9.2	190828_190909	p12_190828_190909_190909_a000	387	Pyramidal	FALSE	FALSE
1845	12	9.2	190828_190909	p12_190828_190909_190909_a000	388	Pyramidal	FALSE	FALSE
1846	12	9.2	190828_190909	p12_190828_190909_190909_a000	389	Pyramidal	FALSE	TRUE
1847	12	9.2	190828_190909	p12_190828_190909_190909_a000	390	Pyramidal	TRUE	TRUE
1848	12	9.2	190828_190909	p12_190828_190909_190909_a000	391	Pyramidal	FALSE	TRUE
1849	12	9.2	190828_190909	p12_190828_190909_190909_a000	392	Pyramidal	FALSE	FALSE
1850	12	9.2	190828_190909	p12_190828_190909_190909_a000	393	Pyramidal	FALSE	FALSE
1851	12	9.2	190828_190909	p12_190828_190909_190909_a000	394	Pyramidal	FALSE	FALSE
1852	12	9.2	190828_190909	p12_190828_190909_190909_a000	395	Pyramidal	TRUE	FALSE
1853	12	9.2	190828_190909	p12_190828_190909_190909_a001	0	Interneuron	FALSE	TRUE
1854	12	9.2	190828_190909	p12_190828_190909_190909_a001	1	Interneuron	TRUE	FALSE
1855	12	9.2	190828_190909	p12_190828_190909_190909_a001	2	Interneuron	TRUE	FALSE
1856	12	9.2	190828_190909	p12_190828_190909_190909_a001	3	Pyramidal	FALSE	FALSE
1857	12	9.2	190828_190909	p12_190828_190909_190909_a001	4	Interneuron	TRUE	FALSE
1858	12	9.2	190828_190909	p12_190828_190909_190909_a001	5	Pyramidal	FALSE	TRUE
1859	12	9.2	190828_190909	p12_190828_190909_190909_a001	6	Pyramidal	FALSE	FALSE
1860	12	9.2	190828_190909	p12_190828_190909_190909_a001	7	Pyramidal	FALSE	FALSE
1861	12	9.2	190828_190909	p12_190828_190909_190909_a001	8	Pyramidal	TRUE	FALSE
1862	12	9.2	190828_190909	p12_190828_190909_190909_a001	9	Pyramidal	FALSE	FALSE
1863	12	9.2	190828_190909	p12_190828_190909_190909_a001	10	Pyramidal	FALSE	FALSE
1864	12	9.2	190828_190909	p12_190828_190909_190909_a001	11	Pyramidal	FALSE	FALSE
1865	12	9.2	190828_190909	p12_190828_190909_190909_a001	12	Pyramidal	FALSE	FALSE
1866	12	9.2	190828_190909	p12_190828_190909_190909_a001	13	Pyramidal	FALSE	FALSE
1867	12	9.2	190828_190909	p12_190828_190909_190909_a001	14	Pyramidal	TRUE	FALSE
1868	12	9.2	190828_190909	p12_190828_190909_190909_a001	15	Interneuron	TRUE	FALSE
1869	12	9.2	190828_190909	p12_190828_190909_190909_a001	16	Interneuron	TRUE	FALSE
1870	12	9.2	190828_190909	p12_190828_190909_190909_a001	17	Pyramidal	FALSE	FALSE
1871	12	9.2	190828_190909	p12_190828_190909_190909_a001	18	Pyramidal	FALSE	TRUE
1872	12	9.2	190828_190909	p12_190828_190909_190909_a001	19	Interneuron	TRUE	FALSE
1873	12	9.2	190828_190909	p12_190828_190909_190909_a001	20	Interneuron	TRUE	FALSE
1874	12	9.2	190828_190909	p12_190828_190909_190909_a001	21	Pyramidal	FALSE	TRUE
1875	12	9.2	190828_190909	p12_190828_190909_190909_a001	22	Pyramidal	FALSE	TRUE
1876	12	9.2	190828_190909	p12_190828_190909_190909_a001	23	Pyramidal	FALSE	FALSE
1877	12	9.2	190828_190909	p12_190828_190909_190909_a001	24	Pyramidal	TRUE	FALSE
1878	12	9.2	190828_190909	p12_190828_190909_190909_a001	25	Interneuron	FALSE	TRUE
1879	12	9.2	190828_190909	p12_190828_190909_190909_a001	26	Pyramidal	FALSE	TRUE
1880	12	9.2	190828_190909	p12_190828_190909_190909_a001	27	Pyramidal	FALSE	FALSE
1881	12	9.2	190828_190909	p12_190828_190909_190909_a001	28	Pyramidal	FALSE	TRUE
1882	12	9.2	190828_190909	p12_190828_190909_190909_a001	29	Pyramidal	FALSE	FALSE
1883	12	9.2	190828_190909	p12_190828_190909_190909_a001	30	Pyramidal	FALSE	TRUE
1884	12	9.2	190828_190909	p12_190828_190909_190909_a001	31	Pyramidal	TRUE	FALSE
1885	12	9.2	190828_190909	p12_190828_190909_190909_a001	32	Pyramidal	TRUE	FALSE
1886	12	9.2	190828_190909	p12_190828_190909_190909_a001	33	Interneuron	FALSE	TRUE
1887	12	9.2	190828_190909	p12_190828_190909_190909_a001	34	Pyramidal	FALSE	FALSE
1888	12	9.2	190828_190909	p12_190828_190909_190909_a001	35	Pyramidal	FALSE	FALSE
1889	12	9.2	190828_190909	p12_190828_190909_190909_a001	36	Pyramidal	TRUE	FALSE
1890	12	9.2	190828_190909	p12_190828_190909_190909_a001	37	Pyramidal	FALSE	FALSE
1891	12	9.2	190828_190909	p12_190828_190909_190909_a001	38	Interneuron	TRUE	FALSE
1892	12	9.2	190828_190909	p12_190828_190909_190909_a001	39	Pyramidal	FALSE	FALSE
1893	12	9.2	190828_190909	p12_190828_190909_190909_a001	40	Pyramidal	FALSE	TRUE
1894	12	9.2	190828_190909	p12_190828_190909_190909_a001	41	Pyramidal	FALSE	FALSE
1895	12	9.2	190828_190909	p12_190828_190909_190909_a001	42	Pyramidal	FALSE	TRUE
1896	12	9.2	190828_190909	p12_190828_190909_190909_a001	43	Pyramidal	FALSE	TRUE
1897	12	9.2	190828_190909	p12_190828_190909_190909_a001	44	Pyramidal	FALSE	FALSE
1898	12	9.2	190828_190909	p12_190828_190909_190909_a001	45	Pyramidal	FALSE	FALSE
1899	12	9.2	190828_190909	p12_190828_190909_190909_a001	46	Pyramidal	FALSE	FALSE
1900	12	9.2	190828_190909	p12_190828_190909_190909_a001	47	Pyramidal	FALSE	FALSE
1901	12	9.2	190828_190909	p12_190828_190909_190909_a001	48	Pyramidal	FALSE	FALSE
1902	12	9.2	190828_190909	p12_190828_190909_190909_a001	49	Pyramidal	FALSE	FALSE
1903	12	9.2	190828_190909	p12_190828_190909_190909_a001	50	Pyramidal	FALSE	FALSE
1904	12	9.2	190828_190909	p12_190828_190909_190909_a001	51	Pyramidal	FALSE	FALSE
1905	12	9.2	190828_190909	p12_190828_190909_190909_a001	52	Pyramidal	TRUE	FALSE
1906	12	9.2	190828_190909	p12_190828_190909_190909_a001	53	Pyramidal	TRUE	FALSE
1907	12	9.2	190828_190909	p12_190828_190909_190909_a001	54	Pyramidal	FALSE	TRUE
1908	12	9.2	190828_190909	p12_190828_190909_190909_a001	55	Pyramidal	FALSE	FALSE
1909	12	9.2	190828_190909	p12_190828_190909_190909_a001	56	Pyramidal	FALSE	FALSE
1910	12	9.2	190828_190909	p12_190828_190909_190909_a001	57	Pyramidal	FALSE	FALSE
1911	12	9.2	190828_190909	p12_190828_190909_190909_a001	58	Pyramidal	FALSE	FALSE
1912	12	9.2	190828_190909	p12_190828_190909_190909_a001	59	Pyramidal	FALSE	FALSE
1913	12	9.2	190828_190909	p12_190828_190909_190909_a001	60	Pyramidal	FALSE	FALSE
1914	12	9.2	190828_190909	p12_190828_190909_190909_a001	61	Pyramidal	FALSE	FALSE
1915	12	9.2	190828_190909	p12_190828_190909_190909_a001	62	Interneuron	FALSE	FALSE
1916	12	9.2	190828_190909	p12_190828_190909_190909_a001	63	Pyramidal	FALSE	FALSE
1917	12	9.2	190828_190909	p12_190828_190909_190909_a001	64	Pyramidal	FALSE	FALSE
1918	12	9.2	190828_190909	p12_190828_190909_190909_a001	65	Interneuron	FALSE	FALSE
1919	12	9.2	190828_190909	p12_190828_190909_190909_a001	66	Pyramidal	FALSE	TRUE
1920	12	9.2	190828_190909	p12_190828_190909_190909_a001	67	Pyramidal	FALSE	TRUE
1921	12	9.2	190828_190909	p12_190828_190909_190909_a001	68	Pyramidal	FALSE	FALSE
1922	12	9.2	190828_190909	p12_190828_190909_190909_a001	69	Pyramidal	FALSE	FALSE
1923	12	9.2	190828_190909	p12_190828_190909_190909_a001	70	Pyramidal	FALSE	TRUE
1924	12	9.2	190828_190909	p12_190828_190909_190909_a001	71	Pyramidal	FALSE	TRUE
1925	12	9.2	190828_190909	p12_190828_190909_190909_a001	72	Pyramidal	FALSE	FALSE
1926	12	9.2	190828_190909	p12_190828_190909_190909_a001	73	Pyramidal	FALSE	FALSE
1927	12	9.2	190828_190909	p12_190828_190909_190909_a001	74	Pyramidal	FALSE	FALSE
1928	12	9.2	190828_190909	p12_190828_190909_190909_a001	75	Pyramidal	FALSE	TRUE
1929	12	9.2	190828_190909	p12_190828_190909_190909_a001	76	Interneuron	FALSE	TRUE
1930	12	9.2	190828_190909	p12_190828_190909_190909_a001	77	Pyramidal	FALSE	TRUE
1931	12	9.2	190828_190909	p12_190828_190909_190909_a001	78	Pyramidal	TRUE	TRUE
1932	12	9.2	190828_190909	p12_190828_190909_190909_a001	79	Pyramidal	FALSE	FALSE
1933	12	9.2	190828_190909	p12_190828_190909_190909_a001	80	Pyramidal	FALSE	TRUE
1934	12	9.2	190828_190909	p12_190828_190909_190909_a001	81	Pyramidal	FALSE	FALSE
1935	12	9.2	190828_190909	p12_190828_190909_190909_a001	82	Pyramidal	FALSE	TRUE
1936	12	9.2	190828_190909	p12_190828_190909_190909_a001	83	Pyramidal	FALSE	TRUE
1937	12	9.2	190828_190909	p12_190828_190909_190909_a001	84	Pyramidal	FALSE	FALSE
1938	12	9.2	190828_190909	p12_190828_190909_190909_a001	85	Interneuron	FALSE	FALSE
1939	12	9.2	190828_190909	p12_190828_190909_190909_a001	86	Pyramidal	FALSE	FALSE
1940	12	9.2	190828_190909	p12_190828_190909_190909_a001	87	Pyramidal	FALSE	TRUE
1941	12	9.2	190828_190909	p12_190828_190909_190909_a001	88	Pyramidal	FALSE	FALSE
1942	12	9.2	190828_190909	p12_190828_190909_190909_a001	89	Pyramidal	FALSE	FALSE
1943	12	9.2	190828_190909	p12_190828_190909_190909_a001	90	Pyramidal	FALSE	FALSE
1944	12	9.2	190828_190909	p12_190828_190909_190909_a001	91	Pyramidal	FALSE	FALSE
1945	12	9.2	190828_190909	p12_190828_190909_190909_a001	92	Pyramidal	FALSE	TRUE
1946	12	9.2	190828_190909	p12_190828_190909_190909_a001	93	Pyramidal	FALSE	FALSE
1947	12	9.2	190828_190909	p12_190828_190909_190909_a001	94	Pyramidal	FALSE	FALSE
1948	12	9.2	190828_190909	p12_190828_190909_190909_a001	95	Pyramidal	FALSE	FALSE
1949	12	9.2	190828_190909	p12_190828_190909_190909_a001	96	Interneuron	TRUE	FALSE
1950	12	9.2	190828_190909	p12_190828_190909_190909_a001	97	Pyramidal	TRUE	FALSE
1951	12	9.2	190828_190909	p12_190828_190909_190909_a001	98	Pyramidal	FALSE	TRUE
1952	12	9.2	190828_190909	p12_190828_190909_190909_a001	99	Pyramidal	FALSE	FALSE
1953	12	9.2	190828_190909	p12_190828_190909_190909_a001	100	Pyramidal	FALSE	FALSE
1954	12	9.2	190828_190909	p12_190828_190909_190909_a001	101	Pyramidal	FALSE	FALSE
1955	12	9.2	190828_190909	p12_190828_190909_190909_a001	102	Pyramidal	FALSE	TRUE
1956	12	9.2	190828_190909	p12_190828_190909_190909_a001	103	Pyramidal	FALSE	FALSE
1957	12	9.2	190828_190909	p12_190828_190909_190909_a001	104	Interneuron	TRUE	FALSE
1958	12	9.2	190828_190909	p12_190828_190909_190909_a001	105	Pyramidal	FALSE	FALSE
1959	12	9.2	190828_190909	p12_190828_190909_190909_a001	106	Pyramidal	FALSE	TRUE
1960	12	9.2	190828_190909	p12_190828_190909_190909_a001	107	Pyramidal	FALSE	FALSE
1961	12	9.2	190828_190909	p12_190828_190909_190909_a001	108	Interneuron	FALSE	FALSE
1962	12	9.2	190828_190909	p12_190828_190909_190909_a001	109	Pyramidal	TRUE	FALSE
1963	12	9.2	190828_190909	p12_190828_190909_190909_a001	110	Pyramidal	FALSE	TRUE
1964	12	9.2	190828_190909	p12_190828_190909_190909_a001	111	Pyramidal	FALSE	FALSE
1965	12	9.2	190828_190909	p12_190828_190909_190909_a001	112	Pyramidal	FALSE	FALSE
1966	12	9.2	190828_190909	p12_190828_190909_190909_a001	113	Pyramidal	FALSE	TRUE
1967	12	9.2	190828_190909	p12_190828_190909_190909_a001	114	Pyramidal	FALSE	FALSE
1968	12	9.2	190828_190909	p12_190828_190909_190909_a001	115	Pyramidal	FALSE	TRUE
1969	12	9.2	190828_190909	p12_190828_190909_190909_a001	116	Pyramidal	FALSE	FALSE
1970	12	9.2	190828_190909	p12_190828_190909_190909_a001	117	Pyramidal	FALSE	FALSE
1971	12	9.2	190828_190909	p12_190828_190909_190909_a001	118	Interneuron	TRUE	FALSE
1972	12	9.2	190828_190909	p12_190828_190909_190909_a001	119	Pyramidal	FALSE	TRUE
1973	12	9.2	190828_190909	p12_190828_190909_190909_a001	120	Pyramidal	FALSE	FALSE
1974	12	9.2	190828_190909	p12_190828_190909_190909_a001	121	Pyramidal	FALSE	FALSE
1975	12	9.2	190828_190909	p12_190828_190909_190909_a001	122	Pyramidal	FALSE	FALSE
1976	12	9.2	190828_190909	p12_190828_190909_190909_a001	123	Pyramidal	FALSE	TRUE
1977	12	9.2	190828_190909	p12_190828_190909_190909_a001	124	Pyramidal	FALSE	TRUE
1978	12	9.2	190828_190909	p12_190828_190909_190909_a001	125	Pyramidal	FALSE	FALSE
1979	12	9.2	190828_190909	p12_190828_190909_190909_a001	126	Pyramidal	FALSE	FALSE
1980	12	9.2	190828_190909	p12_190828_190909_190909_a001	127	Pyramidal	FALSE	FALSE
1981	12	9.2	190828_190909	p12_190828_190909_190909_a001	128	Pyramidal	FALSE	TRUE
1982	12	9.2	190828_190909	p12_190828_190909_190909_a001	129	Pyramidal	FALSE	TRUE
1983	12	9.2	190828_190909	p12_190828_190909_190909_a001	130	Pyramidal	FALSE	TRUE
1984	12	9.2	190828_190909	p12_190828_190909_190909_a001	131	Pyramidal	TRUE	FALSE
1985	12	9.2	190828_190909	p12_190828_190909_190909_a001	132	Pyramidal	FALSE	TRUE
1986	12	9.2	190828_190909	p12_190828_190909_190909_a001	133	Pyramidal	FALSE	FALSE
1987	12	9.2	190828_190909	p12_190828_190909_190909_a001	134	Pyramidal	FALSE	FALSE
1988	12	9.2	190828_190909	p12_190828_190909_190909_a001	135	Pyramidal	FALSE	FALSE
1989	12	9.2	190828_190909	p12_190828_190909_190909_a001	136	Pyramidal	FALSE	TRUE
1990	12	9.2	190828_190909	p12_190828_190909_190909_a001	137	Pyramidal	FALSE	FALSE
1991	12	9.2	190828_190909	p12_190828_190909_190909_a001	138	Pyramidal	TRUE	FALSE
1992	12	9.2	190828_190909	p12_190828_190909_190909_a001	139	Pyramidal	FALSE	TRUE
1993	12	9.2	190828_190909	p12_190828_190909_190909_a001	140	Pyramidal	FALSE	FALSE
1994	12	9.2	190828_190909	p12_190828_190909_190909_a001	141	Pyramidal	FALSE	FALSE
1995	12	9.2	190828_190909	p12_190828_190909_190909_a001	142	Pyramidal	FALSE	FALSE
1996	12	9.2	190828_190909	p12_190828_190909_190909_a001	143	Pyramidal	FALSE	TRUE
1997	12	9.2	190828_190909	p12_190828_190909_190909_a001	144	Interneuron	FALSE	FALSE
1998	12	9.2	190828_190909	p12_190828_190909_190909_a001	145	Pyramidal	FALSE	FALSE
[truncated: 27,132 more rows]
