# Supplementary material for: The rapid developmental rise of somatic inhibition disengages hippocampal dynamics from self-motion
Source: eLife journal article supplement (doi:10.7554/elife.78116), 2022-07-20
Supplement: supp [file inSCE_spikes_ratio_table_animal.xlsx]

## Sheet: Sheet1
	Age	N_Cells	Weight	Mean_N_spikes	Mean_N_spikes_in_SCE	In_SCE_spike_ratio_description
	mean	size	mean	mean	mean	mean	std	min	median	max
SubjectID
171029_171110	12	1058	7	35.0983	12.587	0.392771	0.197769	0	0.394737	1
171211_171220	9	372	5.05	31.6317	16.2473	0.505931	0.16573	0	0.51788	1
180201_180207	6	971	4.35	25.794	15.2822	0.578242	0.221119	0	0.57634	1
180201_180208	7	2725	3.85	24.5479	13.6029	0.560524	0.201879	0	0.565217	1
181009_181017	8	1215	6	23.4658	12.6568	0.51007	0.214575	0	0.5	1
181016_181024	8	565	6.4	26.9593	13.3628	0.496376	0.193798	0	0.5	1
190211_190220_0	9	2930	5.2	16.3365	6.61297	0.397291	0.231997	0	0.380952	1
190211_190221_0	10	1535	6.55	16.7003	7.30619	0.444946	0.252532	0	0.433333	1
190211_190222	11	606	7.95	17.8977	6.76898	0.427394	0.257662	0	0.416667	1
190226_190305	7	410	7	11.1341	6.28049	0.503381	0.288211	0	0.5	1
190226_190308	10	1142	8.6	12.0368	4.26357	0.3478	0.273917	0	0.3125	1
190305_190314	9	943	5.75	20.6903	9.03499	0.435491	0.207762	0	0.4375	1
190313_190322	9	1540	7.1	14.5195	5.97597	0.446454	0.253841	0	0.44	1
190320_190325	5	1552	3.75	8.91753	4.75515	0.541876	0.327129	0	0.547727	1
190320_190327	7	2157	4.85	12.2364	5.50487	0.445053	0.254742	0	0.4375	1
190828_190909	12	826	9.2	52.6005	16.0993	0.334803	0.171589	0	0.333333	1
190911_190923	12	413	5.75	60.3535	17.2518	0.29817	0.145692	0	0.283951	1
190921_190927_1	6	240	3.75	38.9583	21.4917	0.548669	0.166238	0.125	0.55102	1
190921_190929_1	8	698	5.6	37.3567	15.8524	0.436167	0.167467	0	0.428571	1
190921_190930	9	1899	6.3	30.3728	11.9458	0.398653	0.177049	0	0.384615	1
190921_191001	10	486	5.9	34.4753	14.3827	0.416687	0.161665	0	0.416667	1
190921_191002	11	567	5.75	45.2099	15.2099	0.328737	0.133495	0	0.325	1
190921_191003	12	294	6.15	46.0544	12.6939	0.27546	0.141405	0	0.25	1
191122_191204	12	1432	6.8	42.7556	14.8673	0.378301	0.194596	0	0.358209	1
191205_191210_0	5	444	3.55	59.7748	31.7973	0.558645	0.206937	0	0.54717	1
191205_191210_1	5	629	3.95	33.5819	17.0541	0.522554	0.211284	0	0.5	1
191205_191211_1	6	961	4.45	31.9594	16.4006	0.543562	0.198202	0	0.533333	1
191205_191213	8	1009	4.6	38.9029	17.6432	0.443866	0.169944	0	0.440339	1
191212_191220	8	1157	5.25	57.7658	28.5428	0.488451	0.146846	0	0.492754	1
200103_200110_0	7	939	5.15	39.8147	18.9052	0.485229	0.192956	0	0.470588	1
200206_200213	7	933	6.25	41.8864	24.0772	0.565834	0.202717	0	0.560303	1
200306_200311	5	660	3.8	40.9955	24.9409	0.6264	0.199681	0	0.645161	1
