# Supplementary figures and images for: The rapid developmental rise of somatic inhibition disengages hippocampal dynamics from self-motion
Source: eLife journal article supplement (doi:10.7554/elife.78116), 2022-07-20

# Figure 3 – figure supplement 1

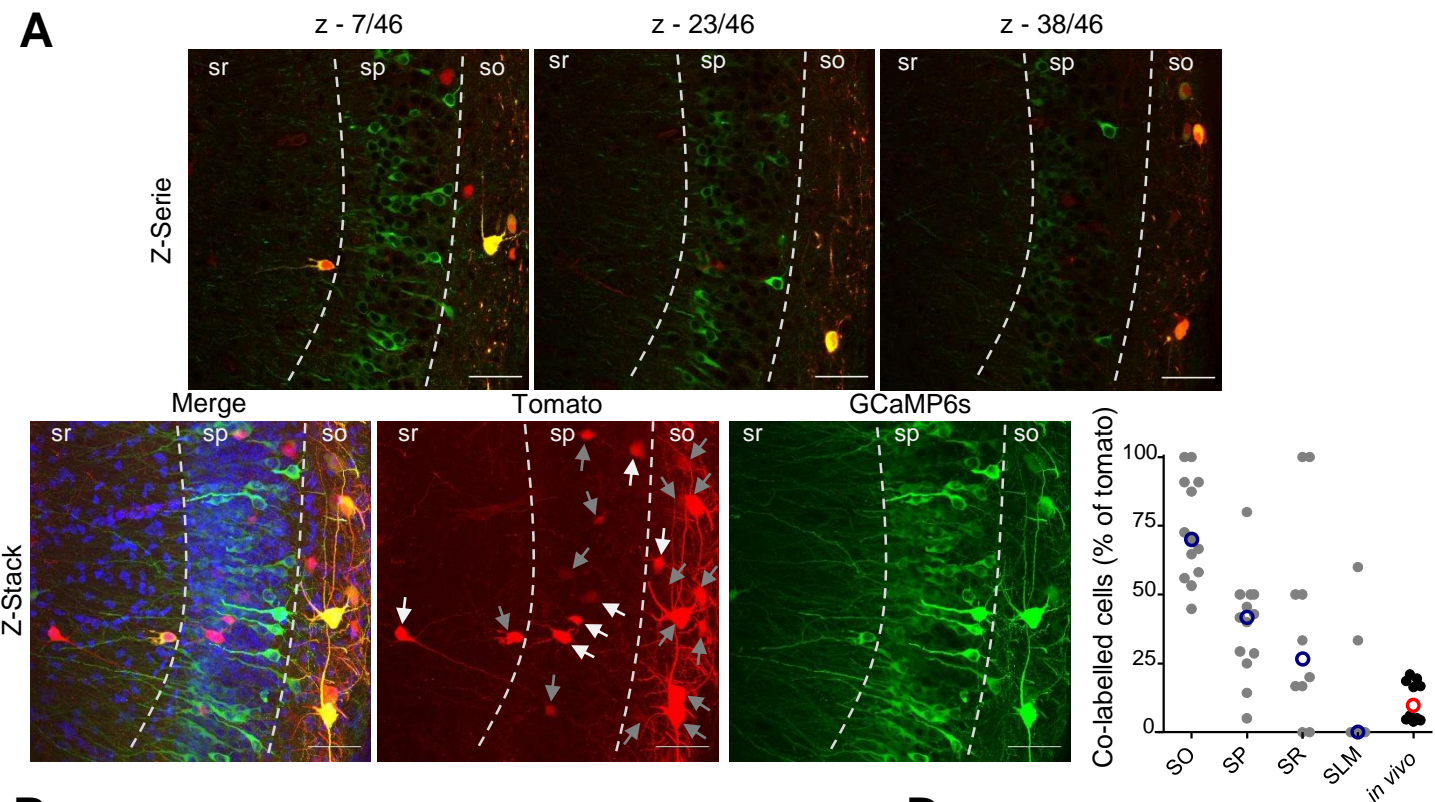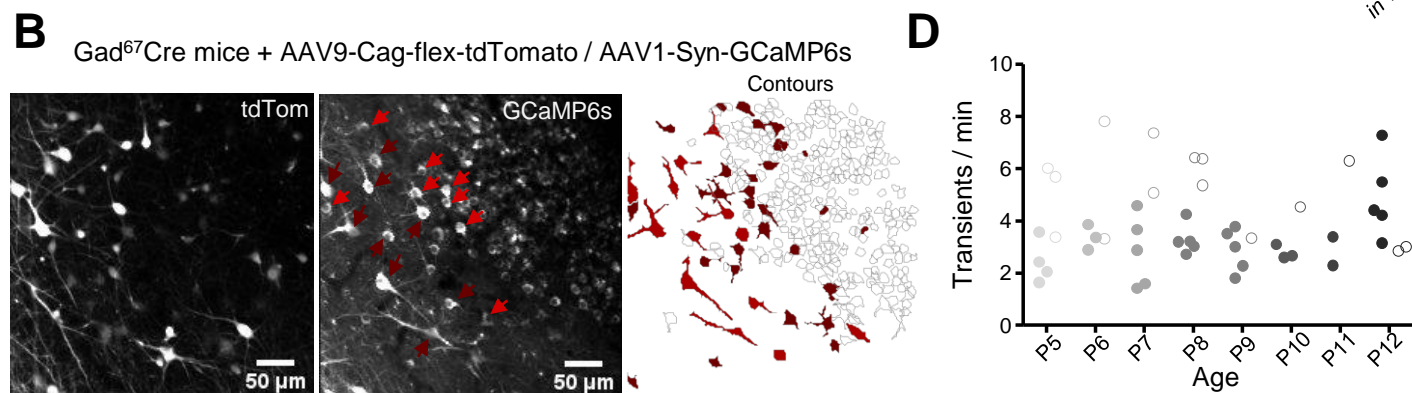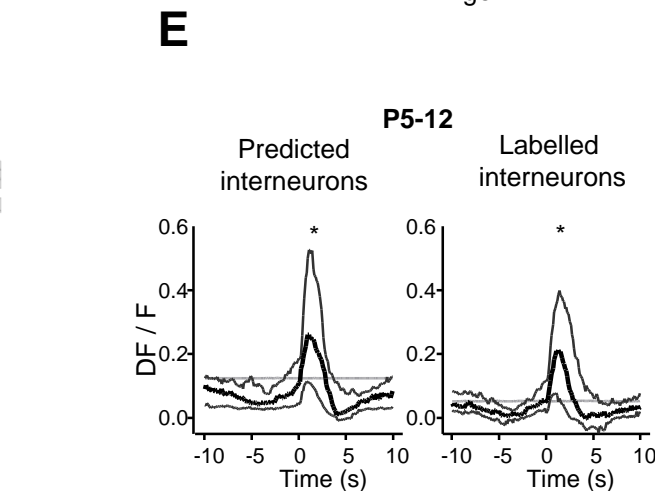

**C**

|            |     | Ground Truth |     |   |
|------------|-----|--------------|-----|---|
|            |     | Pyr          | INs | N |
| Prediction | Pyr | 46           | 5   | 0 |
|            | INs | 1            | 31  | 2 |
|            | N   | 4            | 2   | 9 |

Supplement: supp [file elife-78116-supp-v1.zip]

Figure 4 – figure supplement 1

A

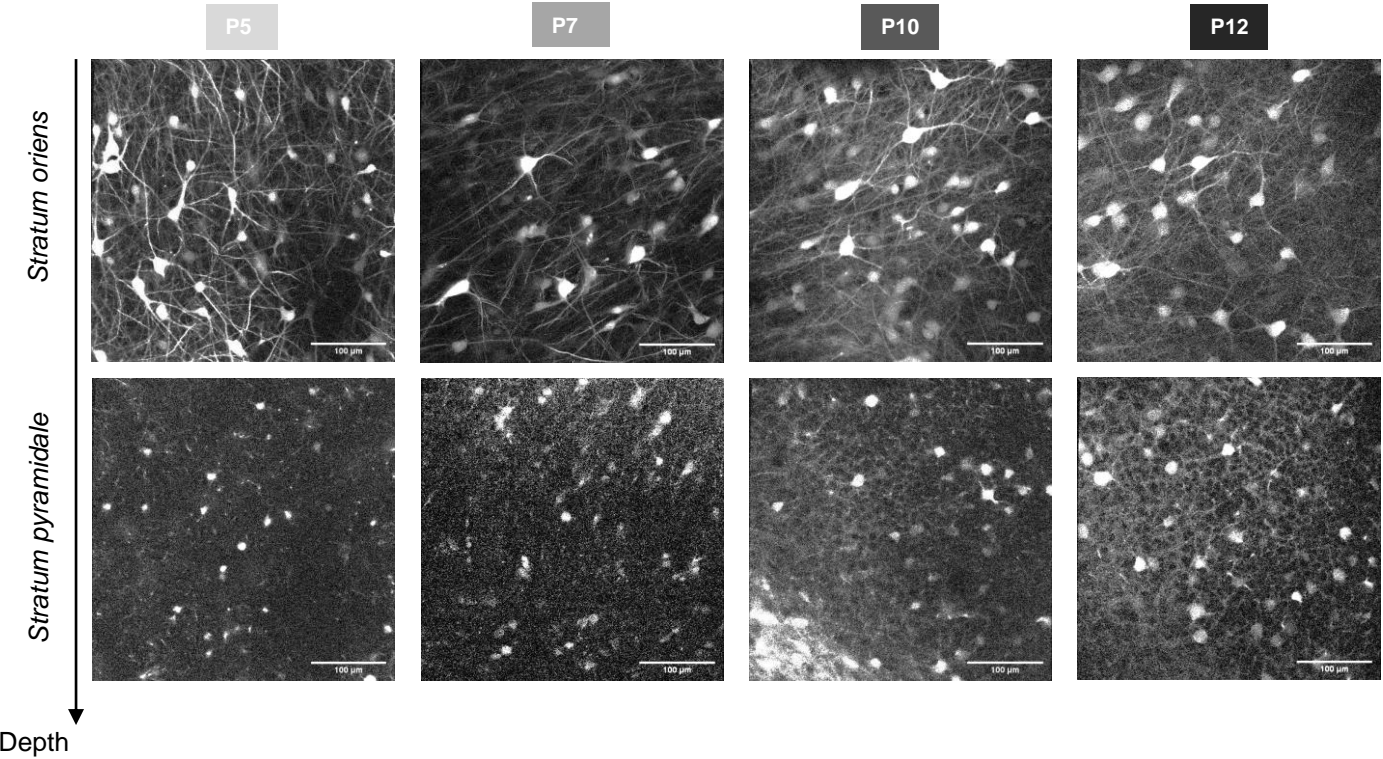

B

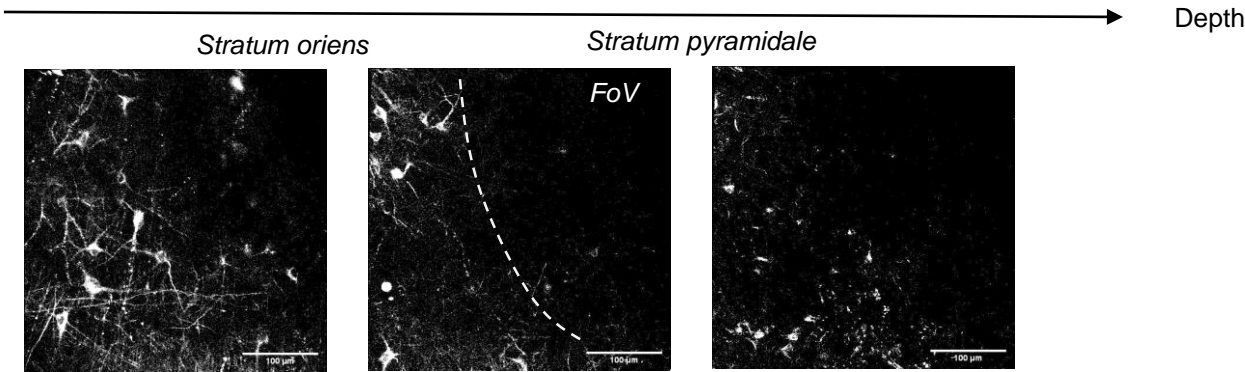

Supplement: supp [file elife-78116-supp-v1.zip]

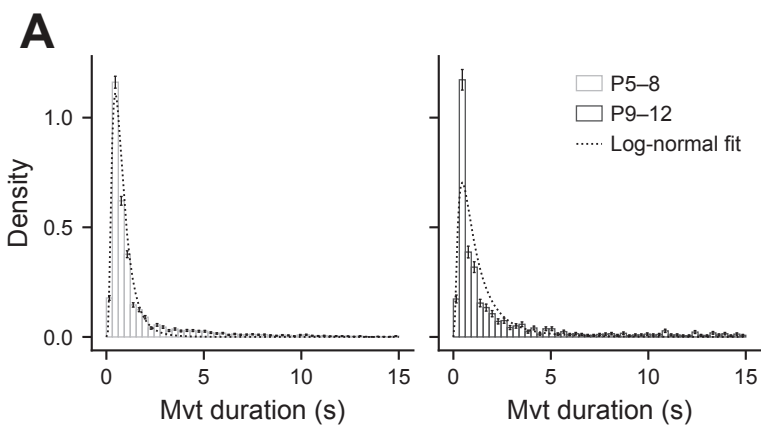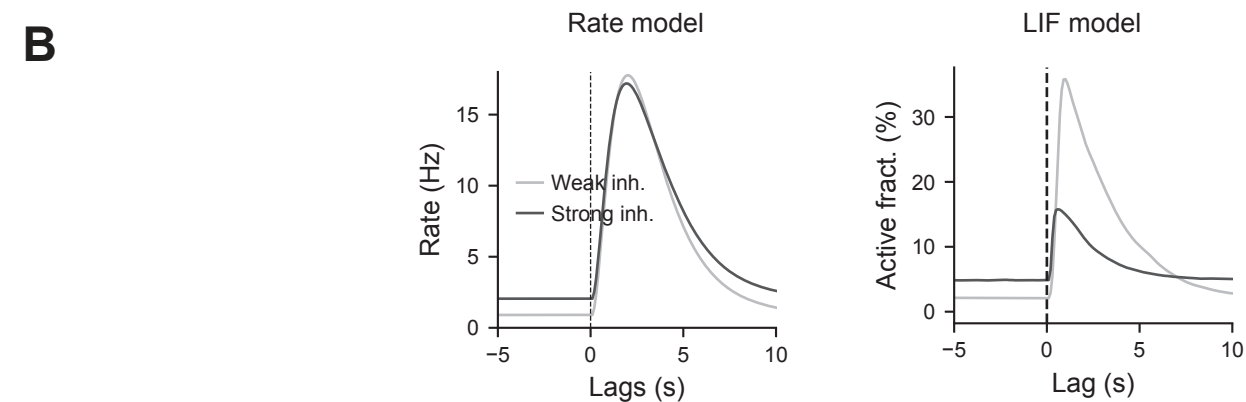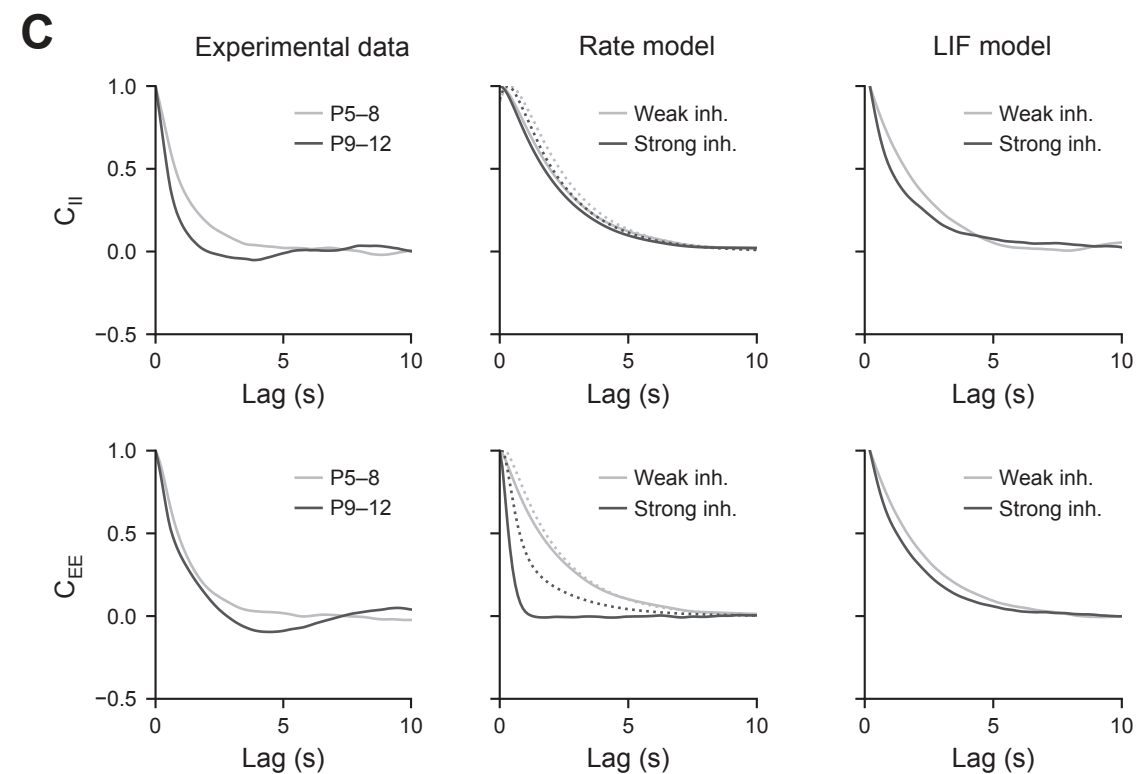

Supplement: supp [file elife-78116-supp-v1.zip]

**Figure 2 – figure supplement 1**

**A**

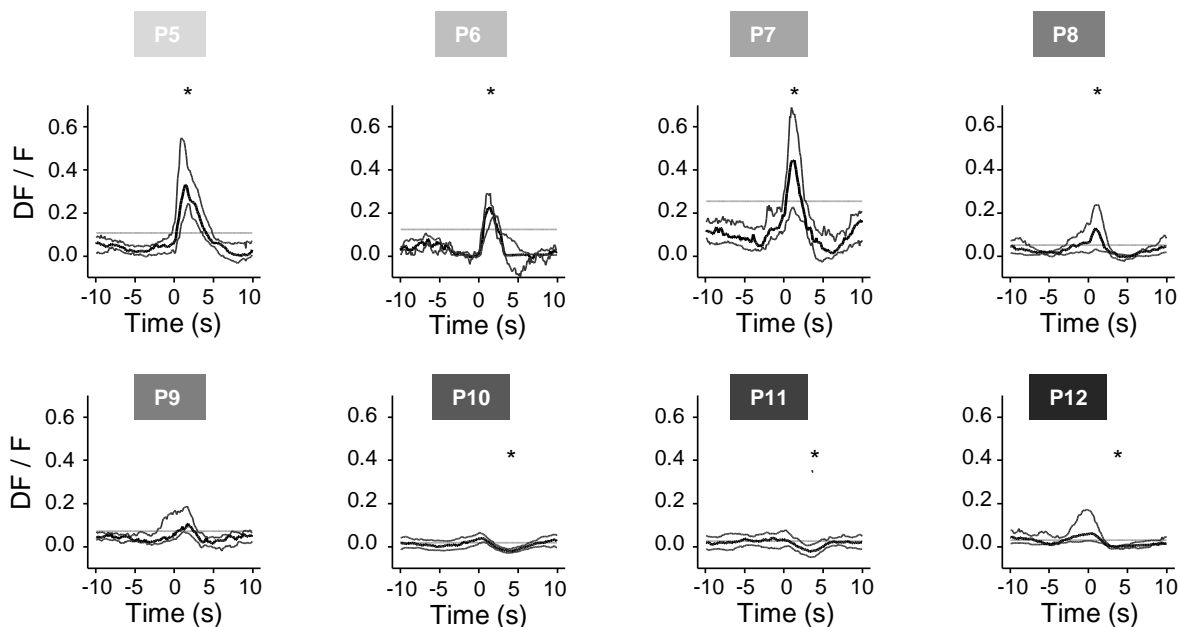

**B**

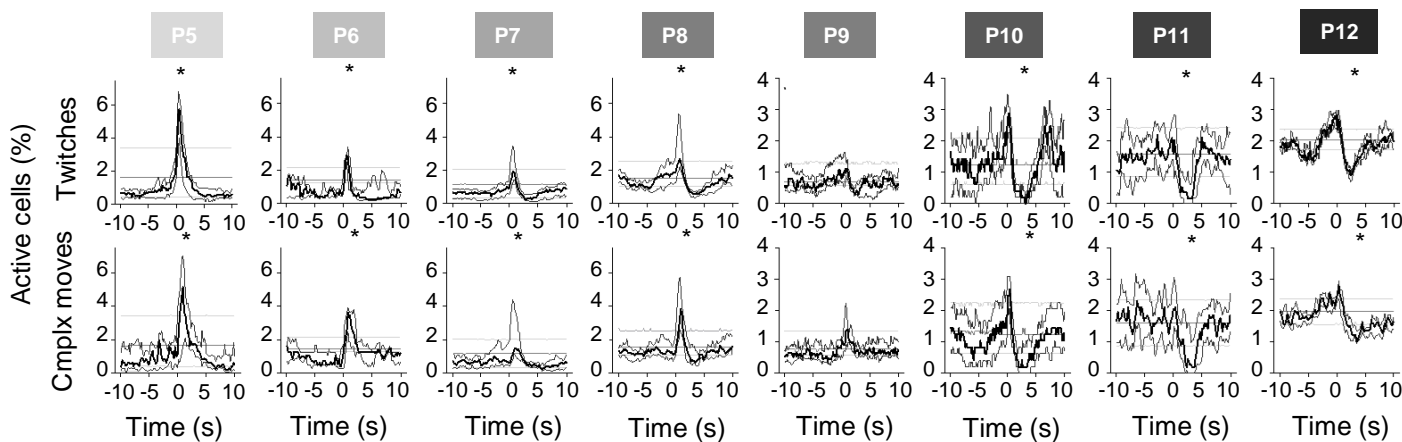

**C**

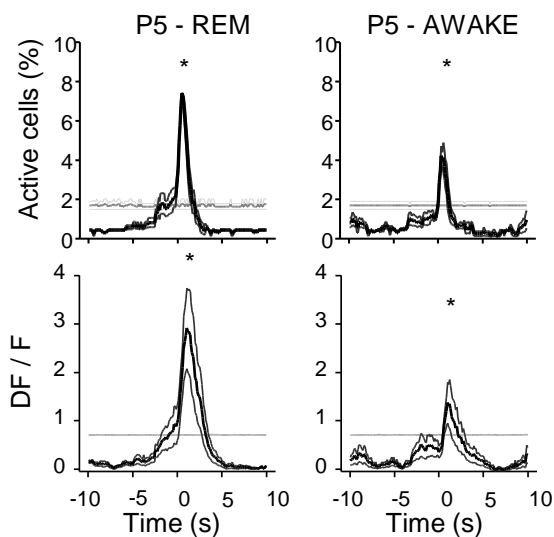

**D**

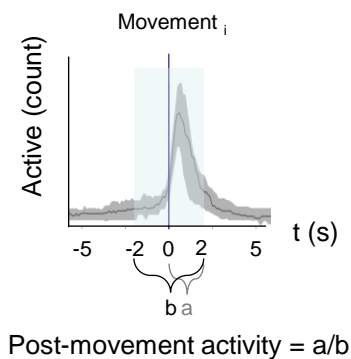

**E**

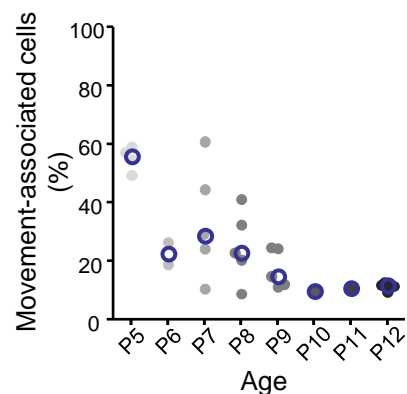

Supplement: supp [file elife-78116-supp-v1.zip]

**Figure 3 – figure supplement 2**

**A**

P5-8

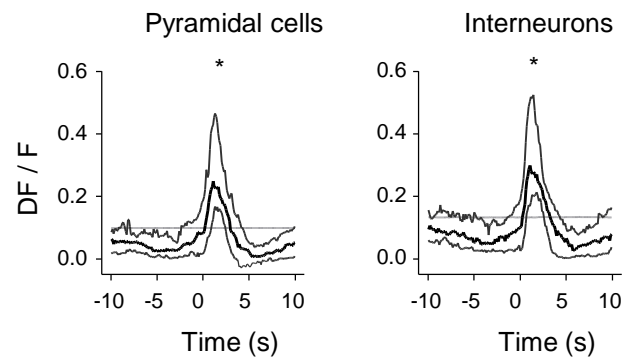

**B**

P10-12

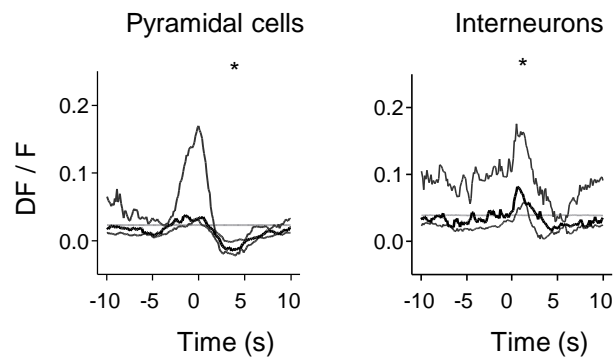

Supplement: supp [file elife-78116-supp-v1.zip]

# Figure 3 – figure supplement 3

A

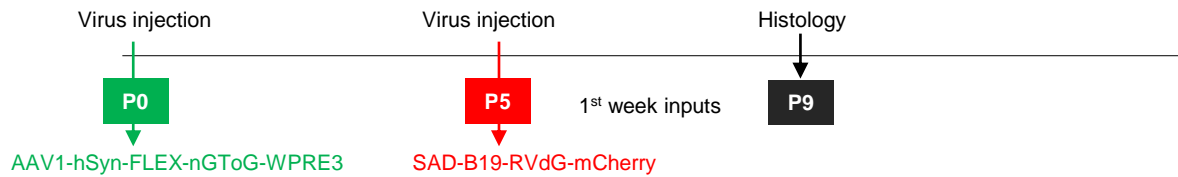

B

*Gad67-Cre*

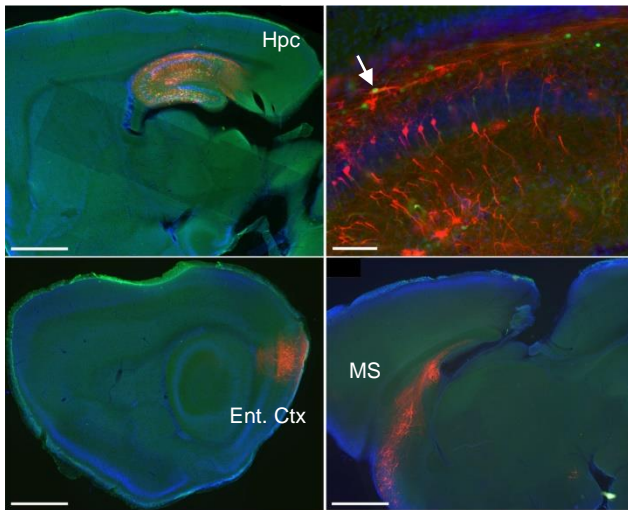

C

*Emx1-Cre*

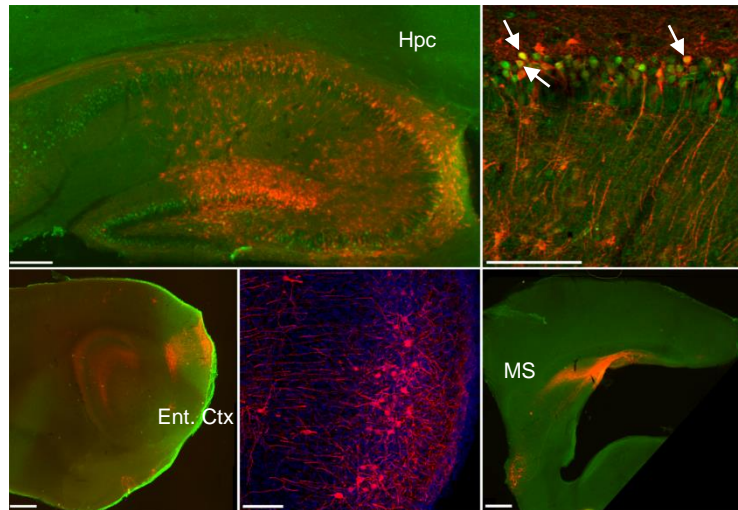

D

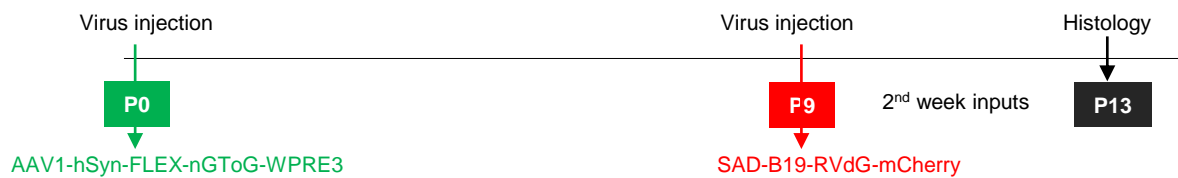

E

*Gad67-Cre*

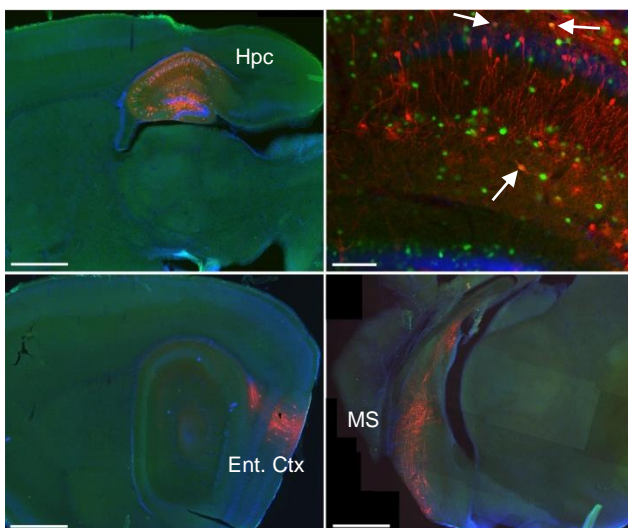

F

*Emx1-Cre*

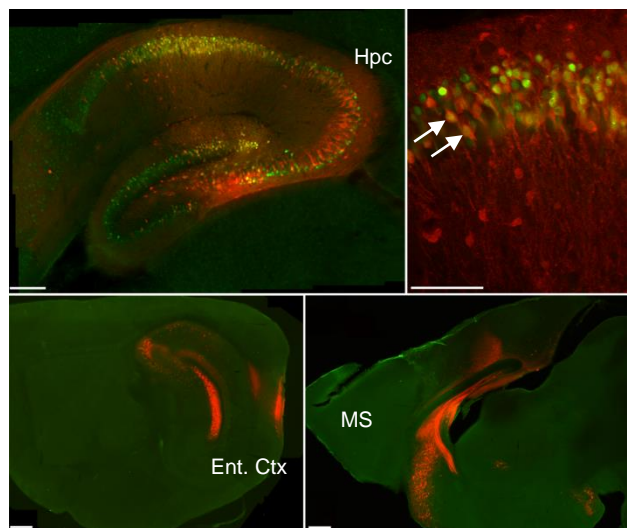

Supplement: supp [file elife-78116-supp-v1.zip]

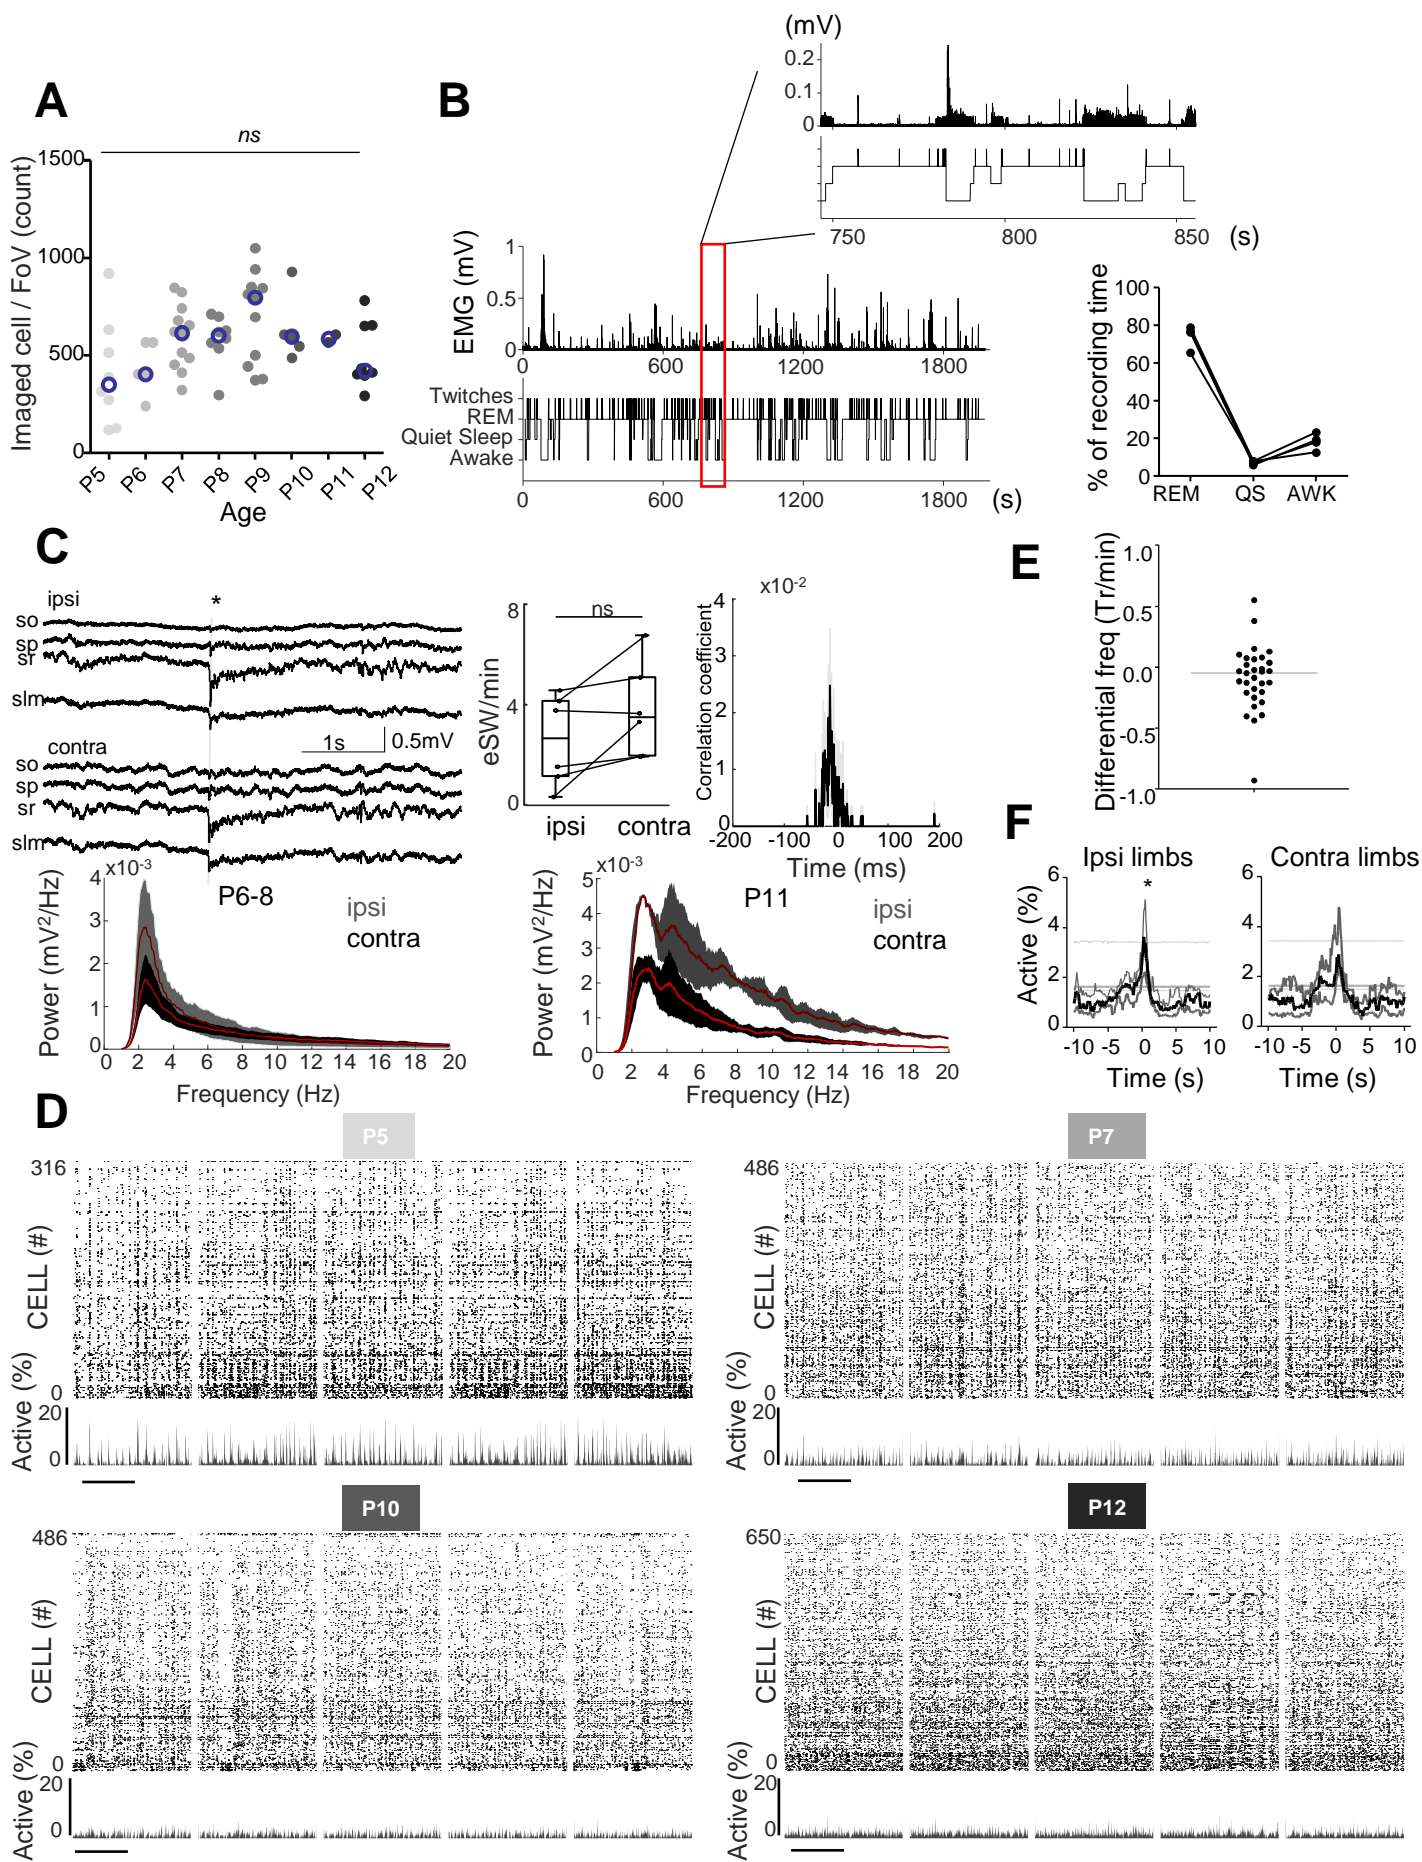

Supplement: supp [file elife-78116-supp-v1.zip]
